# Supplementary material for: Predicting metabolic modules in incomplete bacterial genomes with MetaPathPredict
Source: eLife. 2024 May 2;13:e85749. doi: 10.7554/eLife.85749 (PMC11065424; doi:10.7554/eLife.85749)
Supplement: Appendix 1—figure 1—source data 1. [file elife-85749-app1-fig1-data1.xlsx]

## Sheet: Appendix_Figure_1_Source_Data
Genome ID	Phylum	Class	Order	Family	Genus	Species	Ecosystem category
3300029574_20	Actinobacteriota	Actinobacteria	Actinomycetales	Bifidobacteriaceae	Bifidobacterium	Bifidobacterium adolescentis_B	Human
3300029656_20	Actinobacteriota	Coriobacteriia	Coriobacteriales	Coriobacteriaceae	Collinsella	Collinsella intestinalis	Human
3300029603_19	Actinobacteriota	Actinobacteria	Actinomycetales	Bifidobacteriaceae	Bifidobacterium	Bifidobacterium adolescentis_B	Human
3300029610_31	Actinobacteriota	Actinobacteria	Actinomycetales	Bifidobacteriaceae	Bifidobacterium	Bifidobacterium animalis	Human
3300029767_20	Actinobacteriota	Actinobacteria	Actinomycetales	Bifidobacteriaceae	Bifidobacterium	Bifidobacterium longum	Human
3300029356_18	Actinobacteriota	Actinobacteria	Actinomycetales	Bifidobacteriaceae	Bifidobacterium	Bifidobacterium longum	Human
3300029414_15	Actinobacteriota	Actinobacteria	Actinomycetales	Bifidobacteriaceae	Bifidobacterium	Bifidobacterium longum	Human
3300029562_23	Actinobacteriota	Actinobacteria	Actinomycetales	Bifidobacteriaceae	Bifidobacterium	Bifidobacterium animalis	Human
3300014595_4	Bacteroidota	Bacteroidia	Flavobacteriales	Weeksellaceae	Chryseobacterium_B	NA	Built environment
3300007648_16	Bacteroidota	Bacteroidia	Flavobacteriales	Weeksellaceae	NA	NA	Human
3300017650_9	Bacteroidota	Bacteroidia	Chitinophagales	Chitinophagaceae	46-32	GCA_001898405.1	Terrestrial
3300029733_12	Bacteroidota	Bacteroidia	Bacteroidales	Rikenellaceae	Alistipes_A	Alistipes_A sp1	Human
3300027319_4	Bacteroidota	Rhodothermia	Rhodothermales	Rhodothermaceae	Rhodothermus	Rhodothermus marinus	Lab enrichment
3300024038_3	Bacteroidota	Bacteroidia	Chitinophagales	Chitinophagaceae	46-32	GCA_001898405.1	Arthropoda
3300027322_5	Bacteroidota	Rhodothermia	Rhodothermales	Rhodothermaceae	Rhodothermus	Rhodothermus marinus	Lab enrichment
3300029297_21	Bacteroidota	Bacteroidia	Bacteroidales	Rikenellaceae	Alistipes	NA	Mammals
3300011824_5	Bacteroidota	Bacteroidia	Flavobacteriales	Weeksellaceae	Chishuiella	Chishuiella changwenlii	Built environment
3300017560_8	Bacteroidota	Bacteroidia	Chitinophagales	Chitinophagaceae	46-32	GCA_001898405.1	Terrestrial
3300024218_5	Bacteroidota	Bacteroidia	Chitinophagales	Chitinophagaceae	46-32	GCA_001898405.1	Arthropoda
3300022736_3	Bacteroidota	Bacteroidia	Chitinophagales	Chitinophagaceae	46-32	GCA_001898405.1	Arthropoda
3300022823_4	Bacteroidota	Bacteroidia	Chitinophagales	Chitinophagaceae	46-32	GCA_001898405.1	Arthropoda
3300013855_2	Bacteroidota	Bacteroidia	Flavobacteriales	Weeksellaceae	Elizabethkingia	Elizabethkingia miricola	Built environment
3300005326_35	Edwardsbacteria	AC1	AC1	EtOH8	UBA2226	NA	Bioremediation
3300007500_43	Firmicutes	Bacilli	Mycoplasmatales	Mycoplasmataceae_B	Mycoplasma_D	Mycoplasma_D salivarium	Human
3300014630_4	Firmicutes	Bacilli	Lactobacillales	Enterococcaceae	Enterococcus	Enterococcus faecalis	Built environment
3300013497_7	Firmicutes	Bacilli	Lactobacillales	Streptococcaceae	Lactococcus	Lactococcus garvieae	Built environment
3300008630_5	Firmicutes_C	Negativicutes	Veillonellales	Veillonellaceae	Veillonella	Veillonella parvula	Human
3300007732_6	Firmicutes_C	Negativicutes	Veillonellales	Veillonellaceae	Veillonella	Veillonella parvula	Human
3300014589_2	Proteobacteria	Alphaproteobacteria	Caulobacterales	Caulobacteraceae	Brevundimonas	Brevundimonas naejangsanensis_A	Built environment
3300028569_51	Proteobacteria	Alphaproteobacteria	NA	NA	NA	NA	Aquatic
3300011213_6	Proteobacteria	Gammaproteobacteria	Pseudomonadales	Moraxellaceae	Acinetobacter	Acinetobacter radioresistens	Built environment
3300013815_2	Proteobacteria	Gammaproteobacteria	Pseudomonadales	Moraxellaceae	Acinetobacter	GCA_002365595.1	Built environment
3300013630_2	Proteobacteria	Alphaproteobacteria	Caulobacterales	Caulobacteraceae	Brevundimonas	Brevundimonas diminuta	Built environment
3300013992_2	Proteobacteria	Alphaproteobacteria	Caulobacterales	Caulobacteraceae	Brevundimonas	Brevundimonas naejangsanensis_A	Built environment
3300011750_2	Proteobacteria	Gammaproteobacteria	Betaproteobacteriales	Burkholderiaceae	Alcaligenes	Alcaligenes phenolicus	Built environment
3300028571_42	Proteobacteria	Alphaproteobacteria	NA	NA	NA	NA	Aquatic
3300024953_8	Proteobacteria	Gammaproteobacteria	Betaproteobacteriales	Rhodocyclaceae	Dechloromonas	NA	Aquatic
3300011536_5	Proteobacteria	Gammaproteobacteria	Pseudomonadales	Moraxellaceae	Enhydrobacter	NA	Built environment
3300021419_19	Proteobacteria	Gammaproteobacteria	NA	NA	NA	NA	Aquatic
3300029823_13	Synergistota	Synergistia	Synergistales	Aminobacteriaceae	Aminobacterium	Aminobacterium mobile	Bioreactor
