# Supplementary material for: Predicting metabolic modules in incomplete bacterial genomes with MetaPathPredict
Source: eLife. 2024 May 2;13:e85749. doi: 10.7554/eLife.85749 (PMC11065424; doi:10.7554/eLife.85749)
Supplement: Appendix 1—figure 2—source data 1. [file elife-85749-app1-fig2-data1.xlsx]

## Sheet: Appendix_Figure_3_Source_Data
Genome ID	Database	Phylum	Class	Order	Family	Genus	Species
GCA_001071285.1_ASM107128v1_genomic.fna	gtdb	Proteobacteria	Gammaproteobacteria	Xanthomonadales	Xanthomonadaceae	Stenotrophomonas	Stenotrophomonas maltophilia
GCA_001222745.1_4976_1_10_genomic.fna	gtdb	Proteobacteria	Gammaproteobacteria	Enterobacterales	Yersiniaceae	Yersinia	Yersinia enterocolitica
GCA_001063375.1_ASM106337v1_genomic.fna	gtdb	Proteobacteria	Gammaproteobacteria	Enterobacterales	Yersiniaceae	Serratia	Serratia marcescens
GCA_001062925.1_ASM106292v1_genomic.fna	gtdb	Proteobacteria	Gammaproteobacteria	Enterobacterales	Yersiniaceae	Serratia	Serratia liquefaciens
GCA_001184545.1_ASM118454v1_genomic.fna	gtdb	Proteobacteria	Gammaproteobacteria	Pasteurellales	Pasteurellaceae	Haemophilus	Haemophilus influenzae
GCA_001123825.1_5139_2_1_genomic.fna	gtdb	Proteobacteria	Gammaproteobacteria	Enterobacterales	Yersiniaceae	Yersinia	Yersinia kristensenii
GCA_001125265.1_5139_3_8_genomic.fna	gtdb	Proteobacteria	Gammaproteobacteria	Enterobacterales	Yersiniaceae	Yersinia	Yersinia pseudotuberculosis
GCA_001182105.1_4976_7_10_genomic.fna	gtdb	Proteobacteria	Gammaproteobacteria	Enterobacterales	Yersiniaceae	Yersinia	Yersinia enterocolitica
GCA_001053555.1_ASM105355v1_genomic.fna	gtdb	Actinobacteria	Actinobacteria	Corynebacteriales	Corynebacteriaceae	Corynebacterium	Corynebacterium propinquum
GCA_001186365.1_ASM118636v1_genomic.fna	gtdb	Actinobacteria	Actinobacteria	Corynebacteriales	Gordoniaceae	Gordonia	Gordonia jacobaea
GCA_001174985.1_5749_7_3_genomic.fna	gtdb	Proteobacteria	Gammaproteobacteria	Enterobacterales	Yersiniaceae	Yersinia	Yersinia enterocolitica
GCA_001064405.1_ASM106440v1_genomic.fna	gtdb	Proteobacteria	Gammaproteobacteria	Pseudomonadales	Moraxellaceae	Moraxella	Moraxella canis
GCA_001059235.1_ASM105923v1_genomic.fna	gtdb	Actinobacteria	Actinobacteria	Micrococcales	Promicromonosporaceae	Isoptericola	Isoptericola variabilis
GCA_001067855.1_ASM106785v1_genomic.fna	gtdb	Actinobacteria	Actinobacteria	Micrococcales	Micrococcaceae	Rothia	Rothia mucilaginosa
GCA_001166625.1_4821_6_10_genomic.fna	gtdb	Proteobacteria	Gammaproteobacteria	Enterobacterales	Yersiniaceae	Yersinia	Yersinia intermedia
GCA_001076415.1_ASM107641v1_genomic.fna	gtdb	Proteobacteria	Betaproteobacteria	Burkholderiales	Alcaligenaceae	Oligella	Oligella urethralis
GCA_001160045.1_8016_2_85_genomic.fna	gtdb	Proteobacteria	Gammaproteobacteria	Enterobacterales	Yersiniaceae	Yersinia	Yersinia enterocolitica
GCA_001189595.1_ASM118959v1_genomic.fna	gtdb	Proteobacteria	Betaproteobacteria	Burkholderiales	Alcaligenaceae	Achromobacter	Achromobacter spanius
GCA_001189235.2_ASM118923v2_genomic.fna	gtdb	Proteobacteria	Alphaproteobacteria	Rhizobiales	Bradyrhizobiaceae	Bradyrhizobium	Bradyrhizobium embrapense
GCA_001223065.1_4976_2_7_genomic.fna	gtdb	Proteobacteria	Gammaproteobacteria	Enterobacterales	Yersiniaceae	Yersinia	Yersinia enterocolitica
GCA_001153365.1_5139_5_10_genomic.fna	gtdb	Proteobacteria	Gammaproteobacteria	Enterobacterales	Yersiniaceae	Yersinia	Yersinia kristensenii
GCA_001078335.1_B.canis_SCL_genomic.fna	gtdb	Proteobacteria	Alphaproteobacteria	Rhizobiales	Brucellaceae	Brucella	Brucella canis
GCA_001090225.1_8016_2_66_genomic.fna	gtdb	Proteobacteria	Gammaproteobacteria	Enterobacterales	Yersiniaceae	Yersinia	Yersinia enterocolitica
GCA_001249155.1_8489_2_85_genomic.fna	gtdb	Proteobacteria	Gammaproteobacteria	Enterobacterales	Enterobacteriaceae	Shigella	Shigella sonnei
GCA_001222425.1_4821_8_2_genomic.fna	gtdb	Proteobacteria	Gammaproteobacteria	Enterobacterales	Yersiniaceae	Yersinia	Yersinia intermedia
GCA_001089645.1_4821_6_9_genomic.fna	gtdb	Proteobacteria	Gammaproteobacteria	Enterobacterales	Yersiniaceae	Yersinia	Yersinia frederiksenii
GCA_001219745.1_4976_1_6_genomic.fna	gtdb	Proteobacteria	Gammaproteobacteria	Enterobacterales	Yersiniaceae	Yersinia	Yersinia enterocolitica
GCA_001244855.1_4840_7_12_genomic.fna	gtdb	Proteobacteria	Gammaproteobacteria	Enterobacterales	Yersiniaceae	Yersinia	Yersinia pseudotuberculosis
GCA_001065115.1_ASM106511v1_genomic.fna	gtdb	Actinobacteria	Actinobacteria	Micrococcales	Micrococcaceae	Rothia	Rothia mucilaginosa
GCA_001244995.1_Intestinimonas_massiliensis_genomic.fna	gtdb	Firmicutes	Clostridia	Clostridiales	NA	Intestinimonas	Intestinimonas massiliensis
GCA_001105265.1_8016_2_79_genomic.fna	gtdb	Proteobacteria	Gammaproteobacteria	Enterobacterales	Yersiniaceae	Yersinia	Yersinia enterocolitica
GCA_001217685.1_5103_7_4_genomic.fna	gtdb	Proteobacteria	Gammaproteobacteria	Enterobacterales	Yersiniaceae	Yersinia	Yersinia enterocolitica
GCA_001238615.1_ASM123861v1_genomic.fna	gtdb	Proteobacteria	Gammaproteobacteria	Enterobacterales	Erwiniaceae	Pantoea	Pantoea vagans
GCA_001123345.1_5139_1_6_genomic.fna	gtdb	Proteobacteria	Gammaproteobacteria	Enterobacterales	Yersiniaceae	Yersinia	Yersinia pseudotuberculosis
GCA_001077795.1_ASM107779v1_genomic.fna	gtdb	Bacteroidetes	Flavobacteriia	Flavobacteriales	Flavobacteriaceae	Riemerella	Riemerella anatipestifer
GCA_001072635.1_ASM107263v1_genomic.fna	gtdb	Proteobacteria	Gammaproteobacteria	Xanthomonadales	Xanthomonadaceae	Stenotrophomonas	Stenotrophomonas maltophilia
GCA_001222845.1_4840_8_10_genomic.fna	gtdb	Proteobacteria	Gammaproteobacteria	Enterobacterales	Yersiniaceae	Yersinia	Yersinia frederiksenii
GCA_001220485.1_5116_2_9_genomic.fna	gtdb	Proteobacteria	Gammaproteobacteria	Enterobacterales	Yersiniaceae	Yersinia	Yersinia enterocolitica
GCA_001063545.1_ASM106354v1_genomic.fna	gtdb	Actinobacteria	Actinobacteria	Micrococcales	Micrococcaceae	Rothia	Rothia mucilaginosa
GCA_001247995.1_8290_4_42_genomic.fna	gtdb	Proteobacteria	Gammaproteobacteria	Enterobacterales	Enterobacteriaceae	Shigella	Shigella sonnei
GCA_001219245.1_4976_6_2_genomic.fna	gtdb	Proteobacteria	Gammaproteobacteria	Enterobacterales	Yersiniaceae	Yersinia	Yersinia enterocolitica
GCA_001098625.1_5139_5_4_genomic.fna	gtdb	Proteobacteria	Gammaproteobacteria	Enterobacterales	Yersiniaceae	Yersinia	Yersinia frederiksenii
GCA_001167085.1_4821_8_7_genomic.fna	gtdb	Proteobacteria	Gammaproteobacteria	Enterobacterales	Yersiniaceae	Yersinia	Yersinia intermedia
GCA_001064855.1_ASM106485v1_genomic.fna	gtdb	Proteobacteria	Gammaproteobacteria	Enterobacterales	Yersiniaceae	Serratia	Serratia marcescens
GCA_001187845.1_ASM118784v1_genomic.fna	gtdb	Proteobacteria	Alphaproteobacteria	Rhodobacterales	Rhodobacteraceae	Octadecabacter	Octadecabacter temperatus
GCA_001112925.1_8016_2_91_genomic.fna	gtdb	Proteobacteria	Gammaproteobacteria	Enterobacterales	Yersiniaceae	Yersinia	Yersinia nurmii
GCA_001064975.1_ASM106497v1_genomic.fna	gtdb	Proteobacteria	Gammaproteobacteria	Enterobacterales	Yersiniaceae	Serratia	Serratia marcescens
GCA_001118285.1_4976_3_10_genomic.fna	gtdb	Proteobacteria	Gammaproteobacteria	Enterobacterales	Yersiniaceae	Yersinia	Yersinia enterocolitica
GCA_001174965.1_5749_7_1_genomic.fna	gtdb	Proteobacteria	Gammaproteobacteria	Enterobacterales	Yersiniaceae	Yersinia	Yersinia enterocolitica
GCA_001062815.1_ASM106281v1_genomic.fna	gtdb	Proteobacteria	Gammaproteobacteria	Pseudomonadales	Moraxellaceae	Moraxella	Moraxella catarrhalis
GCA_001056295.1_ASM105629v1_genomic.fna	gtdb	Actinobacteria	Actinobacteria	Corynebacteriales	Corynebacteriaceae	Corynebacterium	Corynebacterium halotolerans
GCA_001104045.1_4821_8_12_genomic.fna	gtdb	Proteobacteria	Gammaproteobacteria	Enterobacterales	Yersiniaceae	Yersinia	Yersinia pseudotuberculosis
GCA_001248805.1_5008_8_1_genomic.fna	gtdb	Proteobacteria	Gammaproteobacteria	Enterobacterales	Enterobacteriaceae	Shigella	Shigella sonnei
GCA_001064535.1_ASM106453v1_genomic.fna	gtdb	Proteobacteria	Gammaproteobacteria	Pseudomonadales	Moraxellaceae	Moraxella	Moraxella canis
GCA_001063195.1_ASM106319v1_genomic.fna	gtdb	Actinobacteria	Actinobacteria	Micrococcales	Microbacteriaceae	Leifsonia	Leifsonia xyli
GCA_001054325.1_ASM105432v1_genomic.fna	gtdb	Actinobacteria	Actinobacteria	Corynebacteriales	Corynebacteriaceae	Corynebacterium	Corynebacterium vitaeruminis
GCA_001106265.1_5116_3_10_genomic.fna	gtdb	Proteobacteria	Gammaproteobacteria	Enterobacterales	Yersiniaceae	Yersinia	Yersinia enterocolitica
GCA_001071065.1_ASM107106v1_genomic.fna	gtdb	Proteobacteria	Gammaproteobacteria	Xanthomonadales	Xanthomonadaceae	Stenotrophomonas	Stenotrophomonas maltophilia
GCA_001053795.1_ASM105379v1_genomic.fna	gtdb	Proteobacteria	Gammaproteobacteria	Pasteurellales	Pasteurellaceae	Haemophilus	Haemophilus influenzae
GCA_001065525.1_ASM106552v1_genomic.fna	gtdb	Proteobacteria	Betaproteobacteria	Burkholderiales	Burkholderiaceae	Ralstonia	Ralstonia solanacearum
GCA_001248405.1_6496_8_11_genomic.fna	gtdb	Proteobacteria	Gammaproteobacteria	Enterobacterales	Enterobacteriaceae	Shigella	Shigella sonnei
GCA_001249595.1_12971_8_38_genomic.fna	gtdb	Proteobacteria	Gammaproteobacteria	Enterobacterales	Enterobacteriaceae	Shigella	Shigella sonnei
GCA_001218165.1_4976_2_2_genomic.fna	gtdb	Proteobacteria	Gammaproteobacteria	Enterobacterales	Yersiniaceae	Yersinia	Yersinia enterocolitica
GCA_001188325.1_YPY_1_genomic.fna	gtdb	Proteobacteria	Gammaproteobacteria	Enterobacterales	Yersiniaceae	Yersinia	Yersinia pestis
GCA_001249535.1_8489_2_82_genomic.fna	gtdb	Proteobacteria	Gammaproteobacteria	Enterobacterales	Enterobacteriaceae	Shigella	Shigella sonnei
GCA_001084885.1_8016_2_75_genomic.fna	gtdb	Proteobacteria	Gammaproteobacteria	Enterobacterales	Yersiniaceae	Yersinia	Yersinia enterocolitica
GCA_001245775.1_8290_4_13_genomic.fna	gtdb	Proteobacteria	Gammaproteobacteria	Enterobacterales	Enterobacteriaceae	Shigella	Shigella sonnei
GCA_001065625.1_ASM106562v1_genomic.fna	gtdb	Proteobacteria	Gammaproteobacteria	Pseudomonadales	Moraxellaceae	Moraxella	Moraxella catarrhalis
GCA_001149865.1_4976_6_10_genomic.fna	gtdb	Proteobacteria	Gammaproteobacteria	Enterobacterales	Yersiniaceae	Yersinia	Yersinia enterocolitica
GCA_001064715.1_ASM106471v1_genomic.fna	gtdb	Proteobacteria	Gammaproteobacteria	Enterobacterales	Yersiniaceae	Serratia	Serratia marcescens
GCA_001187965.2_ASM118796v2_genomic.fna	gtdb	Proteobacteria	Gammaproteobacteria	Enterobacterales	Pectobacteriaceae	Dickeya	Dickeya fangzhongdai
GCA_001055315.1_ASM105531v1_genomic.fna	gtdb	Proteobacteria	Gammaproteobacteria	Enterobacterales	Enterobacteriaceae	Citrobacter	Citrobacter freundii
GCA_001097785.1_4840_7_8_genomic.fna	gtdb	Proteobacteria	Gammaproteobacteria	Enterobacterales	Yersiniaceae	Yersinia	Yersinia enterocolitica
GCA_001157485.1_4821_6_3_genomic.fna	gtdb	Proteobacteria	Gammaproteobacteria	Enterobacterales	Yersiniaceae	Yersinia	Yersinia frederiksenii
GCA_001071655.1_ASM107165v1_genomic.fna	gtdb	Proteobacteria	Gammaproteobacteria	Xanthomonadales	Xanthomonadaceae	Stenotrophomonas	Stenotrophomonas maltophilia
GCA_001136465.1_5139_2_7_genomic.fna	gtdb	Proteobacteria	Gammaproteobacteria	Enterobacterales	Yersiniaceae	Yersinia	Yersinia pseudotuberculosis
GCA_001184135.1_ASM118413v1_genomic.fna	gtdb	Proteobacteria	Gammaproteobacteria	Enterobacterales	Enterobacteriaceae	Shigella	Shigella sonnei
GCA_001063325.1_ASM106332v1_genomic.fna	gtdb	Proteobacteria	Gammaproteobacteria	Enterobacterales	Yersiniaceae	Serratia	Serratia marcescens
GCA_001202045.1_ASM120204v1_genomic.fna	gtdb	Proteobacteria	Alphaproteobacteria	Rhodobacterales	Rhodobacteraceae	Pseudorhodobacter	Pseudorhodobacter ferrugineus
GCA_001072535.1_ASM107253v1_genomic.fna	gtdb	Proteobacteria	Gammaproteobacteria	Xanthomonadales	Xanthomonadaceae	Stenotrophomonas	Stenotrophomonas maltophilia
GCA_001151605.1_4976_7_8_genomic.fna	gtdb	Proteobacteria	Gammaproteobacteria	Enterobacterales	Yersiniaceae	Yersinia	Yersinia enterocolitica
GCA_001247155.1_6350_1_16_genomic.fna	gtdb	Proteobacteria	Gammaproteobacteria	Enterobacterales	Enterobacteriaceae	Shigella	Shigella sonnei
GCA_001071815.1_ASM107181v1_genomic.fna	gtdb	Proteobacteria	Gammaproteobacteria	Xanthomonadales	Xanthomonadaceae	Stenotrophomonas	Stenotrophomonas maltophilia
GCA_001187975.2_ASM118797v2_genomic.fna	gtdb	Proteobacteria	Gammaproteobacteria	Enterobacterales	Pectobacteriaceae	Dickeya	Dickeya fangzhongdai
GCA_001249475.1_6246_5_5_genomic.fna	gtdb	Proteobacteria	Gammaproteobacteria	Enterobacterales	Enterobacteriaceae	Shigella	Shigella sonnei
GCA_001120245.1_4976_3_9_genomic.fna	gtdb	Proteobacteria	Gammaproteobacteria	Enterobacterales	Yersiniaceae	Yersinia	Yersinia enterocolitica
GCA_001087205.1_5116_2_3_genomic.fna	gtdb	Proteobacteria	Gammaproteobacteria	Enterobacterales	Yersiniaceae	Yersinia	Yersinia enterocolitica
GCA_001147045.1_4821_5_5_genomic.fna	gtdb	Proteobacteria	Gammaproteobacteria	Enterobacterales	Yersiniaceae	Yersinia	Yersinia frederiksenii
GCA_001249255.1_11822_8_61_genomic.fna	gtdb	Proteobacteria	Gammaproteobacteria	Enterobacterales	Enterobacteriaceae	Shigella	Shigella sonnei
GCA_001248925.1_5236_3_12_genomic.fna	gtdb	Proteobacteria	Gammaproteobacteria	Enterobacterales	Enterobacteriaceae	Shigella	Shigella sonnei
GCA_001086525.1_4976_6_7_genomic.fna	gtdb	Proteobacteria	Gammaproteobacteria	Enterobacterales	Yersiniaceae	Yersinia	Yersinia enterocolitica
GCA_001248765.1_12971_8_40_genomic.fna	gtdb	Proteobacteria	Gammaproteobacteria	Enterobacterales	Enterobacteriaceae	Shigella	Shigella sonnei
GCA_001244565.1_5139_2_5_genomic.fna	gtdb	Proteobacteria	Gammaproteobacteria	Enterobacterales	Yersiniaceae	Yersinia	Yersinia intermedia
GCA_001085265.1_5103_7_7_genomic.fna	gtdb	Proteobacteria	Gammaproteobacteria	Enterobacterales	Yersiniaceae	Yersinia	Yersinia enterocolitica
GCA_001063455.1_ASM106345v1_genomic.fna	gtdb	Proteobacteria	Betaproteobacteria	Neisseriales	Neisseriaceae	Morococcus	Morococcus cerebrosus
GCA_001248965.1_5417_1_11_genomic.fna	gtdb	Proteobacteria	Gammaproteobacteria	Enterobacterales	Enterobacteriaceae	Shigella	Shigella sonnei
GCA_001063605.1_ASM106360v1_genomic.fna	gtdb	Actinobacteria	Actinobacteria	Propionibacteriales	Propionibacteriaceae	Cutibacterium	Cutibacterium acnes
GCA_001184535.1_ASM118453v1_genomic.fna	gtdb	Proteobacteria	Gammaproteobacteria	Pasteurellales	Pasteurellaceae	Haemophilus	Haemophilus influenzae
GCA_001144105.1_5139_2_8_genomic.fna	gtdb	Proteobacteria	Gammaproteobacteria	Enterobacterales	Yersiniaceae	Yersinia	Yersinia pseudotuberculosis
GCA_001078375.1_ASM107837v1_genomic.fna	gtdb	Firmicutes	Negativicutes	Veillonellales	Veillonellaceae	Veillonella	Veillonella tobetsuensis
GCA_001184265.1_ASM118426v1_genomic.fna	gtdb	Firmicutes	Bacilli	Lactobacillales	Leuconostocaceae	Leuconostoc	Leuconostoc mesenteroides
GCA_001115185.1_5139_3_1_genomic.fna	gtdb	Proteobacteria	Gammaproteobacteria	Enterobacterales	Yersiniaceae	Yersinia	Yersinia kristensenii
GCA_001217565.1_4976_1_4_genomic.fna	gtdb	Proteobacteria	Gammaproteobacteria	Enterobacterales	Yersiniaceae	Yersinia	Yersinia enterocolitica
GCA_001064185.1_ASM106418v1_genomic.fna	gtdb	Actinobacteria	Actinobacteria	Micrococcales	Dermacoccaceae	Kytococcus	Kytococcus sedentarius
GCA_001064265.1_ASM106426v1_genomic.fna	gtdb	Actinobacteria	Actinobacteria	Micrococcales	Micrococcaceae	Rothia	Rothia mucilaginosa
GCA_001062635.1_ASM106263v1_genomic.fna	gtdb	Firmicutes	Bacilli	Lactobacillales	Leuconostocaceae	Leuconostoc	Leuconostoc citreum
GCA_001158365.1_5139_5_1_genomic.fna	gtdb	Proteobacteria	Gammaproteobacteria	Enterobacterales	Yersiniaceae	Yersinia	Yersinia frederiksenii
GCA_001151185.1_4821_8_8_genomic.fna	gtdb	Proteobacteria	Gammaproteobacteria	Enterobacterales	Yersiniaceae	Yersinia	Yersinia frederiksenii
GCA_001069615.1_ASM106961v1_genomic.fna	gtdb	Proteobacteria	Gammaproteobacteria	Xanthomonadales	Xanthomonadaceae	Stenotrophomonas	Stenotrophomonas maltophilia
GCA_001058435.1_ASM105843v1_genomic.fna	gtdb	Proteobacteria	Gammaproteobacteria	Pasteurellales	Pasteurellaceae	Haemophilus	Haemophilus parainfluenzae
GCA_001246455.1_12971_8_24_genomic.fna	gtdb	Proteobacteria	Gammaproteobacteria	Enterobacterales	Enterobacteriaceae	Shigella	Shigella sonnei
GCA_001055565.1_ASM105556v1_genomic.fna	gtdb	Proteobacteria	Gammaproteobacteria	Pasteurellales	Pasteurellaceae	Haemophilus	Haemophilus influenzae
GCA_001182185.1_4976_7_1_genomic.fna	gtdb	Proteobacteria	Gammaproteobacteria	Enterobacterales	Yersiniaceae	Yersinia	Yersinia enterocolitica
GCA_001116865.1_4840_6_5_genomic.fna	gtdb	Proteobacteria	Gammaproteobacteria	Enterobacterales	Yersiniaceae	Yersinia	Yersinia intermedia
GCA_001248605.1_8489_2_90_genomic.fna	gtdb	Proteobacteria	Gammaproteobacteria	Enterobacterales	Enterobacteriaceae	Shigella	Shigella sonnei
GCA_001107025.1_8016_2_72_genomic.fna	gtdb	Proteobacteria	Gammaproteobacteria	Enterobacterales	Yersiniaceae	Yersinia	Yersinia enterocolitica
GCA_001219325.1_4976_1_7_genomic.fna	gtdb	Proteobacteria	Gammaproteobacteria	Enterobacterales	Yersiniaceae	Yersinia	Yersinia enterocolitica
GCA_001060545.1_ASM106054v1_genomic.fna	gtdb	Actinobacteria	Actinobacteria	Micrococcales	Micrococcaceae	Rothia	Rothia mucilaginosa
GCA_001189965.1_ASM118996v1_genomic.fna	gtdb	Proteobacteria	Betaproteobacteria	Burkholderiales	Oxalobacteraceae	Herbaspirillum	Herbaspirillum rhizosphaerae
GCA_001246675.1_6551_1_10_genomic.fna	gtdb	Proteobacteria	Gammaproteobacteria	Enterobacterales	Enterobacteriaceae	Shigella	Shigella sonnei
GCA_001245885.1_8290_4_91_genomic.fna	gtdb	Proteobacteria	Gammaproteobacteria	Enterobacterales	Enterobacteriaceae	Shigella	Shigella sonnei
GCA_001056575.1_ASM105657v1_genomic.fna	gtdb	Proteobacteria	Gammaproteobacteria	Pasteurellales	Pasteurellaceae	Haemophilus	Haemophilus influenzae
GCA_001246155.1_8290_4_93_genomic.fna	gtdb	Proteobacteria	Gammaproteobacteria	Enterobacterales	Enterobacteriaceae	Shigella	Shigella sonnei
GCA_001076835.1_ASM107683v1_genomic.fna	gtdb	Proteobacteria	Gammaproteobacteria	Pasteurellales	Pasteurellaceae	Haemophilus	Haemophilus influenzae
GCA_001124705.1_8016_2_74_genomic.fna	gtdb	Proteobacteria	Gammaproteobacteria	Enterobacterales	Yersiniaceae	Yersinia	Yersinia enterocolitica
GCA_001184475.1_ASM118447v1_genomic.fna	gtdb	Proteobacteria	Gammaproteobacteria	Pasteurellales	Pasteurellaceae	Haemophilus	Haemophilus influenzae
GCA_001249375.1_9870_6_31_genomic.fna	gtdb	Proteobacteria	Gammaproteobacteria	Enterobacterales	Enterobacteriaceae	Shigella	Shigella sonnei
GCA_001188675.1_ASM118867v1_genomic.fna	gtdb	Proteobacteria	Gammaproteobacteria	Enterobacterales	Yersiniaceae	Yersinia	Yersinia pestis
GCA_001052555.1_ASM105255v1_genomic.fna	gtdb	Actinobacteria	Actinobacteria	Corynebacteriales	Corynebacteriaceae	Corynebacterium	Corynebacterium propinquum
GCA_001140625.1_5139_1_11_genomic.fna	gtdb	Proteobacteria	Gammaproteobacteria	Enterobacterales	Yersiniaceae	Yersinia	Yersinia pseudotuberculosis
GCA_001218905.1_5116_2_2_genomic.fna	gtdb	Proteobacteria	Gammaproteobacteria	Enterobacterales	Yersiniaceae	Yersinia	Yersinia enterocolitica
GCA_001134585.1_4821_5_7_genomic.fna	gtdb	Proteobacteria	Gammaproteobacteria	Enterobacterales	Yersiniaceae	Yersinia	Yersinia kristensenii
GCA_001157205.1_5139_3_9_genomic.fna	gtdb	Proteobacteria	Gammaproteobacteria	Enterobacterales	Yersiniaceae	Yersinia	Yersinia pseudotuberculosis
GCA_001246015.1_5417_1_1_genomic.fna	gtdb	Proteobacteria	Gammaproteobacteria	Enterobacterales	Enterobacteriaceae	Shigella	Shigella sonnei
GCA_001150985.1_5139_2_3_genomic.fna	gtdb	Proteobacteria	Gammaproteobacteria	Enterobacterales	Yersiniaceae	Yersinia	Yersinia pseudotuberculosis
GCA_001053915.1_ASM105391v1_genomic.fna	gtdb	Proteobacteria	Gammaproteobacteria	Pasteurellales	Pasteurellaceae	Haemophilus	Haemophilus parainfluenzae
GCA_001249655.1_8289_7_60_genomic.fna	gtdb	Proteobacteria	Gammaproteobacteria	Enterobacterales	Enterobacteriaceae	Shigella	Shigella sonnei
GCA_001217805.1_4840_8_6_genomic.fna	gtdb	Proteobacteria	Gammaproteobacteria	Enterobacterales	Yersiniaceae	Yersinia	Yersinia rohdei
GCA_001222985.1_4976_2_5_genomic.fna	gtdb	Proteobacteria	Gammaproteobacteria	Enterobacterales	Yersiniaceae	Yersinia	Yersinia enterocolitica
GCA_001102185.1_4976_6_1_genomic.fna	gtdb	Proteobacteria	Gammaproteobacteria	Enterobacterales	Yersiniaceae	Yersinia	Yersinia enterocolitica
GCA_001249415.1_9870_6_40_genomic.fna	gtdb	Proteobacteria	Gammaproteobacteria	Enterobacterales	Enterobacteriaceae	Shigella	Shigella sonnei
GCA_001055885.1_ASM105588v1_genomic.fna	gtdb	Proteobacteria	Gammaproteobacteria	Pasteurellales	Pasteurellaceae	Haemophilus	Haemophilus parainfluenzae
GCA_001056285.1_ASM105628v1_genomic.fna	gtdb	Proteobacteria	Betaproteobacteria	Burkholderiales	Alcaligenaceae	Oligella	Oligella urethralis
GCA_001218185.1_4821_8_1_genomic.fna	gtdb	Proteobacteria	Gammaproteobacteria	Enterobacterales	Yersiniaceae	Yersinia	Yersinia frederiksenii
GCA_001059185.1_ASM105918v1_genomic.fna	gtdb	Proteobacteria	Gammaproteobacteria	Pasteurellales	Pasteurellaceae	Haemophilus	Haemophilus influenzae
GCA_001136265.1_4840_6_6_genomic.fna	gtdb	Proteobacteria	Gammaproteobacteria	Enterobacterales	Yersiniaceae	Yersinia	Yersinia enterocolitica
GCA_001054395.1_ASM105439v1_genomic.fna	gtdb	Actinobacteria	Actinobacteria	Corynebacteriales	Corynebacteriaceae	Corynebacterium	Corynebacterium propinquum
GCA_001247045.1_Sg_201311953_TACAGC_L001_genomic.fna	gtdb	Proteobacteria	Gammaproteobacteria	Enterobacterales	Enterobacteriaceae	Shigella	Shigella sonnei
GCA_001144805.1_4821_5_12_genomic.fna	gtdb	Proteobacteria	Gammaproteobacteria	Enterobacterales	Yersiniaceae	Yersinia	Yersinia kristensenii
GCA_001171065.1_4840_6_7_genomic.fna	gtdb	Proteobacteria	Gammaproteobacteria	Enterobacterales	Yersiniaceae	Yersinia	Yersinia frederiksenii
GCA_001072465.1_ASM107246v1_genomic.fna	gtdb	Actinobacteria	Actinobacteria	Micrococcales	Promicromonosporaceae	Xylanimonas	Xylanimonas cellulosilytica
GCA_001174945.1_5749_7_5_genomic.fna	gtdb	Proteobacteria	Gammaproteobacteria	Enterobacterales	Yersiniaceae	Yersinia	Yersinia enterocolitica
GCA_001061665.1_ASM106166v1_genomic.fna	gtdb	Actinobacteria	Actinobacteria	Micrococcales	Micrococcaceae	Rothia	Rothia mucilaginosa
GCA_001218045.1_4821_8_5_genomic.fna	gtdb	Proteobacteria	Gammaproteobacteria	Enterobacterales	Yersiniaceae	Yersinia	Yersinia intermedia
GCA_001223385.1_4821_7_2_genomic.fna	gtdb	Proteobacteria	Gammaproteobacteria	Enterobacterales	Yersiniaceae	Yersinia	Yersinia rohdei
GCA_001064335.1_ASM106433v1_genomic.fna	gtdb	Proteobacteria	Gammaproteobacteria	Enterobacterales	Yersiniaceae	Serratia	Serratia marcescens
GCA_001068915.1_ASM106891v1_genomic.fna	gtdb	Proteobacteria	Gammaproteobacteria	Xanthomonadales	Xanthomonadaceae	Stenotrophomonas	Stenotrophomonas maltophilia
GCA_001085865.1_4821_5_6_genomic.fna	gtdb	Proteobacteria	Gammaproteobacteria	Enterobacterales	Yersiniaceae	Yersinia	Yersinia kristensenii
GCA_001071045.1_ASM107104v1_genomic.fna	gtdb	Proteobacteria	Gammaproteobacteria	Xanthomonadales	Xanthomonadaceae	Stenotrophomonas	Stenotrophomonas maltophilia
GCA_001248485.1_5417_1_6_genomic.fna	gtdb	Proteobacteria	Gammaproteobacteria	Enterobacterales	Enterobacteriaceae	Shigella	Shigella sonnei
GCA_001246975.1_9870_6_25_genomic.fna	gtdb	Proteobacteria	Gammaproteobacteria	Enterobacterales	Enterobacteriaceae	Shigella	Shigella sonnei
GCA_001061655.1_ASM106165v1_genomic.fna	gtdb	Actinobacteria	Actinobacteria	Micrococcales	Micrococcaceae	Rothia	Rothia mucilaginosa
GCA_001076975.1_ASM107697v1_genomic.fna	gtdb	Actinobacteria	Actinobacteria	Corynebacteriales	Corynebacteriaceae	Corynebacterium	Corynebacterium striatum
GCA_001248275.1_12971_8_29_genomic.fna	gtdb	Proteobacteria	Gammaproteobacteria	Enterobacterales	Enterobacteriaceae	Shigella	Shigella sonnei
GCA_001248885.1_12971_8_64_genomic.fna	gtdb	Proteobacteria	Gammaproteobacteria	Enterobacterales	Enterobacteriaceae	Shigella	Shigella sonnei
GCA_001059425.1_ASM105942v1_genomic.fna	gtdb	Proteobacteria	Gammaproteobacteria	Pasteurellales	Pasteurellaceae	Aggregatibacter	Aggregatibacter segnis
GCA_001184145.1_ASM118414v1_genomic.fna	gtdb	Proteobacteria	Gammaproteobacteria	Enterobacterales	Enterobacteriaceae	Shigella	Shigella flexneri
GCA_001202035.1_ASM120203v1_genomic.fna	gtdb	Proteobacteria	Alphaproteobacteria	Rhodobacterales	Rhodobacteraceae	Pseudorhodobacter	Pseudorhodobacter wandonensis
GCA_001061885.1_ASM106188v1_genomic.fna	gtdb	Actinobacteria	Actinobacteria	Micrococcales	Dermacoccaceae	Kytococcus	Kytococcus sedentarius
GCA_001066935.1_ASM106693v1_genomic.fna	gtdb	Actinobacteria	Actinobacteria	Micrococcales	Micrococcaceae	Rothia	Rothia dentocariosa
GCA_001102905.1_4976_7_9_genomic.fna	gtdb	Proteobacteria	Gammaproteobacteria	Enterobacterales	Yersiniaceae	Yersinia	Yersinia enterocolitica
GCA_001249295.1_Sg_201400049_GCCAAT_L001_genomic.fna	gtdb	Proteobacteria	Gammaproteobacteria	Enterobacterales	Enterobacteriaceae	Shigella	Shigella sonnei
GCA_001249635.1_5236_2_9_genomic.fna	gtdb	Proteobacteria	Gammaproteobacteria	Enterobacterales	Enterobacteriaceae	Shigella	Shigella sonnei
GCA_001248525.1_Sg_201400893_GGCTAC_L001_genomic.fna	gtdb	Proteobacteria	Gammaproteobacteria	Enterobacterales	Enterobacteriaceae	Shigella	Shigella sonnei
GCA_001091065.1_4821_5_4_genomic.fna	gtdb	Proteobacteria	Gammaproteobacteria	Enterobacterales	Yersiniaceae	Yersinia	Yersinia kristensenii
GCA_001064745.1_ASM106474v1_genomic.fna	gtdb	Proteobacteria	Betaproteobacteria	Neisseriales	Neisseriaceae	Morococcus	Morococcus cerebrosus
GCA_001055195.1_ASM105519v1_genomic.fna	gtdb	Proteobacteria	Gammaproteobacteria	Aeromonadales	Aeromonadaceae	Aeromonas	Aeromonas hydrophila
GCA_001076115.1_ASM107611v1_genomic.fna	gtdb	Proteobacteria	Gammaproteobacteria	Pasteurellales	Pasteurellaceae	Haemophilus	Haemophilus influenzae
GCA_001149645.1_4821_8_10_genomic.fna	gtdb	Proteobacteria	Gammaproteobacteria	Enterobacterales	Yersiniaceae	Yersinia	Yersinia mollaretii
GCA_001248545.1_6551_1_12_genomic.fna	gtdb	Proteobacteria	Gammaproteobacteria	Enterobacterales	Enterobacteriaceae	Shigella	Shigella sonnei
GCA_001249175.1_5236_3_7_genomic.fna	gtdb	Proteobacteria	Gammaproteobacteria	Enterobacterales	Enterobacteriaceae	Shigella	Shigella sonnei
GCA_001063995.1_ASM106399v1_genomic.fna	gtdb	Actinobacteria	Actinobacteria	Micrococcales	Micrococcaceae	Rothia	Rothia mucilaginosa
GCA_001055095.1_ASM105509v1_genomic.fna	gtdb	Proteobacteria	Gammaproteobacteria	Pasteurellales	Pasteurellaceae	Haemophilus	Haemophilus parainfluenzae
GCA_001172905.1_4840_7_5_genomic.fna	gtdb	Proteobacteria	Gammaproteobacteria	Enterobacterales	Yersiniaceae	Yersinia	Yersinia ruckeri
GCA_001184075.1_ASM118407v1_genomic.fna	gtdb	Proteobacteria	Gammaproteobacteria	Enterobacterales	Enterobacteriaceae	Shigella	Shigella flexneri
GCA_001189245.1_ASM118924v1_genomic.fna	gtdb	Proteobacteria	Alphaproteobacteria	Rhizobiales	Bradyrhizobiaceae	Bradyrhizobium	Bradyrhizobium pachyrhizi
GCA_001244635.1_8016_2_92_genomic.fna	gtdb	Proteobacteria	Gammaproteobacteria	Enterobacterales	Yersiniaceae	Yersinia	Yersinia pekkanenii
GCA_001219625.1_4976_2_8_genomic.fna	gtdb	Proteobacteria	Gammaproteobacteria	Enterobacterales	Yersiniaceae	Yersinia	Yersinia enterocolitica
GCA_001135745.1_8016_2_62_genomic.fna	gtdb	Proteobacteria	Gammaproteobacteria	Enterobacterales	Yersiniaceae	Yersinia	Yersinia enterocolitica
GCA_001103745.1_4976_7_7_genomic.fna	gtdb	Proteobacteria	Gammaproteobacteria	Enterobacterales	Yersiniaceae	Yersinia	Yersinia enterocolitica
GCA_001221145.1_4976_2_10_genomic.fna	gtdb	Proteobacteria	Gammaproteobacteria	Enterobacterales	Yersiniaceae	Yersinia	Yersinia enterocolitica
GCA_001220805.1_5139_3_4_genomic.fna	gtdb	Proteobacteria	Gammaproteobacteria	Enterobacterales	Yersiniaceae	Yersinia	Yersinia pseudotuberculosis
GCA_001220745.1_4976_2_3_genomic.fna	gtdb	Proteobacteria	Gammaproteobacteria	Enterobacterales	Yersiniaceae	Yersinia	Yersinia enterocolitica
GCA_001188335.1_DYA_1_genomic.fna	gtdb	Proteobacteria	Gammaproteobacteria	Enterobacterales	Yersiniaceae	Yersinia	Yersinia pestis
GCA_001218645.1_4821_7_4_genomic.fna	gtdb	Proteobacteria	Gammaproteobacteria	Enterobacterales	Yersiniaceae	Yersinia	Yersinia mollaretii
GCA_001147425.1_4821_5_9_genomic.fna	gtdb	Proteobacteria	Gammaproteobacteria	Enterobacterales	Yersiniaceae	Yersinia	Yersinia frederiksenii
GCA_001249555.1_Sg_201401054_AGTCAA_L001_genomic.fna	gtdb	Proteobacteria	Gammaproteobacteria	Enterobacterales	Enterobacteriaceae	Shigella	Shigella sonnei
GCA_001069405.1_ASM106940v1_genomic.fna	gtdb	Proteobacteria	Gammaproteobacteria	Xanthomonadales	Xanthomonadaceae	Stenotrophomonas	Stenotrophomonas maltophilia
GCA_001220845.1_4840_8_8_genomic.fna	gtdb	Proteobacteria	Gammaproteobacteria	Enterobacterales	Yersiniaceae	Yersinia	Yersinia mollaretii
GCA_001184485.1_ASM118448v1_genomic.fna	gtdb	Proteobacteria	Gammaproteobacteria	Pasteurellales	Pasteurellaceae	Haemophilus	Haemophilus influenzae
GCA_001058525.1_ASM105852v1_genomic.fna	gtdb	Actinobacteria	Actinobacteria	Corynebacteriales	Corynebacteriaceae	Corynebacterium	Corynebacterium jeikeium
GCA_001221865.1_5116_2_11_genomic.fna	gtdb	Proteobacteria	Gammaproteobacteria	Enterobacterales	Yersiniaceae	Yersinia	Yersinia enterocolitica
GCA_001071195.1_ASM107119v1_genomic.fna	gtdb	Proteobacteria	Gammaproteobacteria	Xanthomonadales	Xanthomonadaceae	Stenotrophomonas	Stenotrophomonas maltophilia
GCA_001221165.1_4821_7_8_genomic.fna	gtdb	Proteobacteria	Gammaproteobacteria	Enterobacterales	Yersiniaceae	Yersinia	Yersinia intermedia
GCA_001222445.1_4976_6_3_genomic.fna	gtdb	Proteobacteria	Gammaproteobacteria	Enterobacterales	Yersiniaceae	Yersinia	Yersinia enterocolitica
GCA_001249135.1_8289_7_88_genomic.fna	gtdb	Proteobacteria	Gammaproteobacteria	Enterobacterales	Enterobacteriaceae	Shigella	Shigella sonnei
GCA_001155565.1_4840_6_2_genomic.fna	gtdb	Proteobacteria	Gammaproteobacteria	Enterobacterales	Yersiniaceae	Yersinia	Yersinia frederiksenii
GCA_001152565.1_4821_6_12_genomic.fna	gtdb	Proteobacteria	Gammaproteobacteria	Enterobacterales	Yersiniaceae	Yersinia	Yersinia pekkanenii
GCA_001248155.1_12971_8_75_genomic.fna	gtdb	Proteobacteria	Gammaproteobacteria	Enterobacterales	Enterobacteriaceae	Shigella	Shigella sonnei
GCA_001136125.1_5139_3_10_genomic.fna	gtdb	Proteobacteria	Gammaproteobacteria	Enterobacterales	Yersiniaceae	Yersinia	Yersinia pseudotuberculosis
GCA_001249005.1_7655_8_14_genomic.fna	gtdb	Proteobacteria	Gammaproteobacteria	Enterobacterales	Enterobacteriaceae	Shigella	Shigella sonnei
GCA_001182365.1_8016_2_77_genomic.fna	gtdb	Proteobacteria	Gammaproteobacteria	Enterobacterales	Yersiniaceae	Yersinia	Yersinia enterocolitica
GCA_001186445.1_ASM118644v1_genomic.fna	gtdb	Actinobacteria	Actinobacteria	Corynebacteriales	Corynebacteriaceae	Corynebacterium	Corynebacterium pseudotuberculosis
GCA_001125285.1_5116_3_4_genomic.fna	gtdb	Proteobacteria	Gammaproteobacteria	Enterobacterales	Yersiniaceae	Yersinia	Yersinia enterocolitica
GCA_001218005.1_5103_7_11_genomic.fna	gtdb	Proteobacteria	Gammaproteobacteria	Enterobacterales	Yersiniaceae	Yersinia	Yersinia enterocolitica
GCA_001220565.1_5103_7_10_genomic.fna	gtdb	Proteobacteria	Gammaproteobacteria	Enterobacterales	Yersiniaceae	Yersinia	Yersinia enterocolitica
GCA_001063175.1_ASM106317v1_genomic.fna	gtdb	Proteobacteria	Gammaproteobacteria	Enterobacterales	Yersiniaceae	Serratia	Serratia marcescens
GCA_001188735.1_ASM118873v1_genomic.fna	gtdb	Proteobacteria	Gammaproteobacteria	Enterobacterales	Yersiniaceae	Yersinia	Yersinia pestis
GCA_001057275.1_ASM105727v1_genomic.fna	gtdb	Proteobacteria	Gammaproteobacteria	Aeromonadales	Aeromonadaceae	Aeromonas	Aeromonas hydrophila
GCA_001069645.1_ASM106964v1_genomic.fna	gtdb	Proteobacteria	Gammaproteobacteria	Xanthomonadales	Xanthomonadaceae	Stenotrophomonas	Stenotrophomonas maltophilia
GCA_001051115.1_ASM105111v1_genomic.fna	gtdb	Bacteroidetes	Flavobacteriia	Flavobacteriales	Flavobacteriaceae	Riemerella	Riemerella anatipestifer
GCA_001127065.1_5139_5_7_genomic.fna	gtdb	Proteobacteria	Gammaproteobacteria	Enterobacterales	Yersiniaceae	Yersinia	Yersinia mollaretii
GCA_001072195.1_ASM107219v1_genomic.fna	gtdb	Proteobacteria	Gammaproteobacteria	Xanthomonadales	Xanthomonadaceae	Stenotrophomonas	Stenotrophomonas maltophilia
GCA_001249575.1_8289_7_94_genomic.fna	gtdb	Proteobacteria	Gammaproteobacteria	Enterobacterales	Enterobacteriaceae	Shigella	Shigella sonnei
GCA_001110725.1_5139_3_3_genomic.fna	gtdb	Proteobacteria	Gammaproteobacteria	Enterobacterales	Yersiniaceae	Yersinia	Yersinia pseudotuberculosis
GCA_001073225.1_ASM107322v1_genomic.fna	gtdb	Proteobacteria	Gammaproteobacteria	Xanthomonadales	Xanthomonadaceae	Stenotrophomonas	Stenotrophomonas maltophilia
GCA_001249275.1_Sg_201312374_TCATTC_L001_genomic.fna	gtdb	Proteobacteria	Gammaproteobacteria	Enterobacterales	Enterobacteriaceae	Shigella	Shigella sonnei
GCA_001064675.1_ASM106467v1_genomic.fna	gtdb	Proteobacteria	Gammaproteobacteria	Enterobacterales	Enterobacteriaceae	Shigella	Shigella boydii
GCA_001083805.1_ASM108380v1_genomic.fna	gtdb	Proteobacteria	Gammaproteobacteria	Enterobacterales	Morganellaceae	Photorhabdus	Photorhabdus luminescens
GCA_001172325.1_5139_3_2_genomic.fna	gtdb	Proteobacteria	Gammaproteobacteria	Enterobacterales	Yersiniaceae	Yersinia	Yersinia pseudotuberculosis
GCA_001064485.1_ASM106448v1_genomic.fna	gtdb	Actinobacteria	Actinobacteria	Micrococcales	Micrococcaceae	Rothia	Rothia dentocariosa
GCA_001218705.1_4976_1_9_genomic.fna	gtdb	Proteobacteria	Gammaproteobacteria	Enterobacterales	Yersiniaceae	Yersinia	Yersinia enterocolitica
GCA_001131685.1_5139_5_11_genomic.fna	gtdb	Proteobacteria	Gammaproteobacteria	Enterobacterales	Yersiniaceae	Yersinia	Yersinia bercovieri
GCA_001247975.1_12971_8_32_genomic.fna	gtdb	Proteobacteria	Gammaproteobacteria	Enterobacterales	Enterobacteriaceae	Shigella	Shigella sonnei
GCA_001249215.1_8290_4_53_genomic.fna	gtdb	Proteobacteria	Gammaproteobacteria	Enterobacterales	Enterobacteriaceae	Shigella	Shigella sonnei
GCA_001090885.1_5116_3_8_genomic.fna	gtdb	Proteobacteria	Gammaproteobacteria	Enterobacterales	Yersiniaceae	Yersinia	Yersinia enterocolitica
GCA_001064415.1_ASM106441v1_genomic.fna	gtdb	Proteobacteria	Gammaproteobacteria	Pasteurellales	Pasteurellaceae	Pasteurella	Pasteurella multocida
GCA_001060585.1_ASM106058v1_genomic.fna	gtdb	Proteobacteria	Gammaproteobacteria	Enterobacterales	Yersiniaceae	Serratia	Serratia marcescens
GCA_001054455.1_ASM105445v1_genomic.fna	gtdb	Proteobacteria	Gammaproteobacteria	Pasteurellales	Pasteurellaceae	Haemophilus	Haemophilus influenzae
GCA_001248785.1_5417_3_8_genomic.fna	gtdb	Proteobacteria	Gammaproteobacteria	Enterobacterales	Enterobacteriaceae	Shigella	Shigella sonnei
GCA_001248625.1_5236_8_8_genomic.fna	gtdb	Proteobacteria	Gammaproteobacteria	Enterobacterales	Enterobacteriaceae	Shigella	Shigella sonnei
GCA_001053885.1_ASM105388v1_genomic.fna	gtdb	Proteobacteria	Gammaproteobacteria	Pasteurellales	Pasteurellaceae	Haemophilus	Haemophilus influenzae
GCA_001078805.1_14928_1_79_genomic.fna	gtdb	Proteobacteria	Gammaproteobacteria	Enterobacterales	Enterobacteriaceae	Shigella	Shigella flexneri
GCA_001056955.1_ASM105695v1_genomic.fna	gtdb	Proteobacteria	Gammaproteobacteria	Aeromonadales	Aeromonadaceae	Aeromonas	Aeromonas hydrophila
GCA_001059125.1_ASM105912v1_genomic.fna	gtdb	Proteobacteria	Gammaproteobacteria	Pasteurellales	Pasteurellaceae	Haemophilus	Haemophilus influenzae
GCA_001247385.1_8489_2_91_genomic.fna	gtdb	Proteobacteria	Gammaproteobacteria	Enterobacterales	Enterobacteriaceae	Shigella	Shigella sonnei
GCA_001064585.1_ASM106458v1_genomic.fna	gtdb	Actinobacteria	Actinobacteria	Micrococcales	Micrococcaceae	Rothia	Rothia mucilaginosa
GCA_001248705.1_8290_4_40_genomic.fna	gtdb	Proteobacteria	Gammaproteobacteria	Enterobacterales	Enterobacteriaceae	Shigella	Shigella sonnei
GCA_001182085.1_5749_7_4_genomic.fna	gtdb	Proteobacteria	Gammaproteobacteria	Enterobacterales	Yersiniaceae	Yersinia	Yersinia enterocolitica
GCA_001076435.1_ASM107643v1_genomic.fna	gtdb	Actinobacteria	Actinobacteria	Corynebacteriales	Corynebacteriaceae	Corynebacterium	Corynebacterium jeikeium
GCA_001088505.1_4840_7_1_genomic.fna	gtdb	Proteobacteria	Gammaproteobacteria	Enterobacterales	Yersiniaceae	Yersinia	Yersinia intermedia
GCA_001166025.1_5139_2_10_genomic.fna	gtdb	Proteobacteria	Gammaproteobacteria	Enterobacterales	Yersiniaceae	Yersinia	Yersinia pseudotuberculosis
GCA_001182345.1_8016_2_78_genomic.fna	gtdb	Proteobacteria	Gammaproteobacteria	Enterobacterales	Yersiniaceae	Yersinia	Yersinia enterocolitica
GCA_001220045.1_4976_3_1_genomic.fna	gtdb	Proteobacteria	Gammaproteobacteria	Enterobacterales	Yersiniaceae	Yersinia	Yersinia enterocolitica
GCA_001146765.1_8016_2_63_genomic.fna	gtdb	Proteobacteria	Gammaproteobacteria	Enterobacterales	Yersiniaceae	Yersinia	Yersinia enterocolitica
GCA_001055915.1_ASM105591v1_genomic.fna	gtdb	Actinobacteria	Actinobacteria	Corynebacteriales	Corynebacteriaceae	Corynebacterium	Corynebacterium jeikeium
GCA_001219605.1_5116_2_4_genomic.fna	gtdb	Proteobacteria	Gammaproteobacteria	Enterobacterales	Yersiniaceae	Yersinia	Yersinia enterocolitica
GCA_001058575.1_ASM105857v1_genomic.fna	gtdb	Proteobacteria	Gammaproteobacteria	Pasteurellales	Pasteurellaceae	Haemophilus	Haemophilus influenzae
GCA_001220765.1_4821_7_10_genomic.fna	gtdb	Proteobacteria	Gammaproteobacteria	Enterobacterales	Yersiniaceae	Yersinia	Yersinia mollaretii
GCA_001184255.1_ASM118425v1_genomic.fna	gtdb	Firmicutes	Bacilli	Lactobacillales	Leuconostocaceae	Leuconostoc	Leuconostoc mesenteroides
GCA_001150565.1_8016_2_83_genomic.fna	gtdb	Proteobacteria	Gammaproteobacteria	Enterobacterales	Yersiniaceae	Yersinia	Yersinia enterocolitica
GCA_001219785.1_4976_1_8_genomic.fna	gtdb	Proteobacteria	Gammaproteobacteria	Enterobacterales	Yersiniaceae	Yersinia	Yersinia enterocolitica
GCA_001182205.1_5116_3_1_genomic.fna	gtdb	Proteobacteria	Gammaproteobacteria	Enterobacterales	Yersiniaceae	Yersinia	Yersinia enterocolitica
GCA_001249235.1_5417_3_3_genomic.fna	gtdb	Proteobacteria	Gammaproteobacteria	Enterobacterales	Enterobacteriaceae	Shigella	Shigella sonnei
GCA_001218485.1_8016_2_82_genomic.fna	gtdb	Proteobacteria	Gammaproteobacteria	Enterobacterales	Yersiniaceae	Yersinia	Yersinia enterocolitica
GCA_001052725.1_ASM105272v1_genomic.fna	gtdb	Proteobacteria	Gammaproteobacteria	Pasteurellales	Pasteurellaceae	Haemophilus	Haemophilus influenzae
GCA_001105765.1_4821_5_3_genomic.fna	gtdb	Proteobacteria	Gammaproteobacteria	Enterobacterales	Yersiniaceae	Yersinia	Yersinia frederiksenii
GCA_001142745.1_4821_6_5_genomic.fna	gtdb	Proteobacteria	Gammaproteobacteria	Enterobacterales	Yersiniaceae	Yersinia	Yersinia frederiksenii
GCA_001222265.1_4976_3_3_genomic.fna	gtdb	Proteobacteria	Gammaproteobacteria	Enterobacterales	Yersiniaceae	Yersinia	Yersinia enterocolitica
GCA_001135485.1_5139_5_6_genomic.fna	gtdb	Proteobacteria	Gammaproteobacteria	Enterobacterales	Yersiniaceae	Yersinia	Yersinia frederiksenii
GCA_001064725.1_ASM106472v1_genomic.fna	gtdb	Proteobacteria	Gammaproteobacteria	Enterobacterales	Yersiniaceae	Serratia	Serratia marcescens
GCA_001105985.1_8016_2_86_genomic.fna	gtdb	Proteobacteria	Gammaproteobacteria	Enterobacterales	Yersiniaceae	Yersinia	Yersinia enterocolitica
GCA_001182165.1_4976_7_3_genomic.fna	gtdb	Proteobacteria	Gammaproteobacteria	Enterobacterales	Yersiniaceae	Yersinia	Yersinia enterocolitica
GCA_001248255.1_5236_8_2_genomic.fna	gtdb	Proteobacteria	Gammaproteobacteria	Enterobacterales	Enterobacteriaceae	Shigella	Shigella sonnei
GCA_001244605.1_5139_2_4_genomic.fna	gtdb	Proteobacteria	Gammaproteobacteria	Enterobacterales	Yersiniaceae	Yersinia	Yersinia kristensenii
GCA_001244675.1_5139_5_2_genomic.fna	gtdb	Proteobacteria	Gammaproteobacteria	Enterobacterales	Yersiniaceae	Yersinia	Yersinia intermedia
GCA_001249615.1_Sg_201400696_ACTTGA_L001_genomic.fna	gtdb	Proteobacteria	Gammaproteobacteria	Enterobacterales	Enterobacteriaceae	Shigella	Shigella sonnei
GCA_001188555.1_ASM118855v1_genomic.fna	gtdb	Proteobacteria	Alphaproteobacteria	Rhodobacterales	Rhodobacteraceae	Pannonibacter	Pannonibacter phragmitetus
GCA_001104645.1_4821_5_8_genomic.fna	gtdb	Proteobacteria	Gammaproteobacteria	Enterobacterales	Yersiniaceae	Yersinia	Yersinia intermedia
GCA_001124425.1_5139_2_9_genomic.fna	gtdb	Proteobacteria	Gammaproteobacteria	Enterobacterales	Yersiniaceae	Yersinia	Yersinia pseudotuberculosis
GCA_001249395.1_9870_6_6_genomic.fna	gtdb	Proteobacteria	Gammaproteobacteria	Enterobacterales	Enterobacteriaceae	Shigella	Shigella sonnei
GCA_001182145.1_4976_7_5_genomic.fna	gtdb	Proteobacteria	Gammaproteobacteria	Enterobacterales	Yersiniaceae	Yersinia	Yersinia enterocolitica
GCA_001057055.1_ASM105705v1_genomic.fna	gtdb	Actinobacteria	Actinobacteria	Micrococcales	Cellulomonadaceae	Cellulomonas	Cellulomonas flavigena
GCA_001155645.1_5139_1_10_genomic.fna	gtdb	Proteobacteria	Gammaproteobacteria	Enterobacterales	Yersiniaceae	Yersinia	Yersinia pseudotuberculosis
GCA_001055485.1_ASM105548v1_genomic.fna	gtdb	Proteobacteria	Gammaproteobacteria	Pasteurellales	Pasteurellaceae	Haemophilus	Haemophilus influenzae
GCA_001157385.1_5139_5_8_genomic.fna	gtdb	Proteobacteria	Gammaproteobacteria	Enterobacterales	Yersiniaceae	Yersinia	Yersinia intermedia
GCA_001064145.1_ASM106414v1_genomic.fna	gtdb	Actinobacteria	Actinobacteria	Micrococcales	Sanguibacteraceae	Sanguibacter	Sanguibacter keddieii
GCA_001238575.1_ASM123857v1_genomic.fna	gtdb	Proteobacteria	Gammaproteobacteria	Enterobacterales	Pectobacteriaceae	Pectobacterium	Pectobacterium carotovorum
GCA_001065915.1_ASM106591v1_genomic.fna	gtdb	Proteobacteria	Gammaproteobacteria	Enterobacterales	Morganellaceae	Proteus	Proteus mirabilis
GCA_001248385.1_6551_1_3_genomic.fna	gtdb	Proteobacteria	Gammaproteobacteria	Enterobacterales	Enterobacteriaceae	Shigella	Shigella sonnei
GCA_001222305.1_5103_7_2_genomic.fna	gtdb	Proteobacteria	Gammaproteobacteria	Enterobacterales	Yersiniaceae	Yersinia	Yersinia enterocolitica
GCA_001114105.1_5139_1_4_genomic.fna	gtdb	Proteobacteria	Gammaproteobacteria	Enterobacterales	Yersiniaceae	Yersinia	Yersinia similis
GCA_001069685.1_ASM106968v1_genomic.fna	gtdb	Proteobacteria	Gammaproteobacteria	Xanthomonadales	Xanthomonadaceae	Stenotrophomonas	Stenotrophomonas maltophilia
GCA_001220825.1_4976_2_9_genomic.fna	gtdb	Proteobacteria	Gammaproteobacteria	Enterobacterales	Yersiniaceae	Yersinia	Yersinia enterocolitica
GCA_001064655.1_ASM106465v1_genomic.fna	gtdb	Proteobacteria	Gammaproteobacteria	Pseudomonadales	Moraxellaceae	Moraxella	Moraxella catarrhalis
GCA_001051325.1_Rickettsia_aeschlimannii_genomic.fna	gtdb	Proteobacteria	Alphaproteobacteria	Rickettsiales	Rickettsiaceae	Rickettsia	Rickettsia aeschlimannii
GCA_001166725.1_4840_7_6_genomic.fna	gtdb	Proteobacteria	Gammaproteobacteria	Enterobacterales	Yersiniaceae	Yersinia	Yersinia ruckeri
GCA_001152185.1_5139_5_9_genomic.fna	gtdb	Proteobacteria	Gammaproteobacteria	Enterobacterales	Yersiniaceae	Yersinia	Yersinia rohdei
GCA_001121425.1_8016_2_68_genomic.fna	gtdb	Proteobacteria	Gammaproteobacteria	Enterobacterales	Yersiniaceae	Yersinia	Yersinia enterocolitica
GCA_001222925.1_4821_7_3_genomic.fna	gtdb	Proteobacteria	Gammaproteobacteria	Enterobacterales	Yersiniaceae	Yersinia	Yersinia mollaretii
GCA_001053095.1_5139_1_3_genomic.fna	gtdb	Proteobacteria	Gammaproteobacteria	Enterobacterales	Yersiniaceae	Yersinia	Yersinia similis
GCA_001220145.1_5116_2_8_genomic.fna	gtdb	Proteobacteria	Gammaproteobacteria	Enterobacterales	Yersiniaceae	Yersinia	Yersinia enterocolitica
GCA_001221085.1_5116_2_5_genomic.fna	gtdb	Proteobacteria	Gammaproteobacteria	Enterobacterales	Yersiniaceae	Yersinia	Yersinia enterocolitica
GCA_001217745.1_4976_6_4_genomic.fna	gtdb	Proteobacteria	Gammaproteobacteria	Enterobacterales	Yersiniaceae	Yersinia	Yersinia enterocolitica
GCA_001073045.1_ASM107304v1_genomic.fna	gtdb	Proteobacteria	Gammaproteobacteria	Xanthomonadales	Xanthomonadaceae	Stenotrophomonas	Stenotrophomonas maltophilia
GCA_001223145.1_4976_1_5_genomic.fna	gtdb	Proteobacteria	Gammaproteobacteria	Enterobacterales	Yersiniaceae	Yersinia	Yersinia enterocolitica
GCA_001218525.1_5116_2_6_genomic.fna	gtdb	Proteobacteria	Gammaproteobacteria	Enterobacterales	Yersiniaceae	Yersinia	Yersinia enterocolitica
GCA_001244655.1_5139_1_7_genomic.fna	gtdb	Proteobacteria	Gammaproteobacteria	Enterobacterales	Yersiniaceae	Yersinia	Yersinia pseudotuberculosis
GCA_001062855.1_ASM106285v1_genomic.fna	gtdb	Actinobacteria	Actinobacteria	Micrococcales	Micrococcaceae	Rothia	Rothia mucilaginosa
GCA_001059385.1_ASM105938v1_genomic.fna	gtdb	Actinobacteria	Actinobacteria	Corynebacteriales	Corynebacteriaceae	Corynebacterium	Corynebacterium jeikeium
GCA_001184245.1_ASM118424v1_genomic.fna	gtdb	Firmicutes	Bacilli	Lactobacillales	Leuconostocaceae	Leuconostoc	Leuconostoc mesenteroides
GCA_001122605.1_8016_2_88_genomic.fna	gtdb	Proteobacteria	Gammaproteobacteria	Enterobacterales	Yersiniaceae	Yersinia	Yersinia aldovae
GCA_001065405.1_ASM106540v1_genomic.fna	gtdb	Proteobacteria	Gammaproteobacteria	Enterobacterales	Yersiniaceae	Serratia	Serratia marcescens
GCA_001068765.1_ASM106876v1_genomic.fna	gtdb	Proteobacteria	Gammaproteobacteria	Xanthomonadales	Xanthomonadaceae	Stenotrophomonas	Stenotrophomonas maltophilia
GCA_001214465.1_7396_7_36_genomic.fna	gtdb	Actinobacteria	Actinobacteria	Corynebacteriales	Mycobacteriaceae	Mycobacteroides	Mycobacteroides abscessus
GCA_001158505.1_5139_5_5_genomic.fna	gtdb	Proteobacteria	Gammaproteobacteria	Enterobacterales	Yersiniaceae	Yersinia	Yersinia kristensenii
GCA_001160345.1_8016_2_61_genomic.fna	gtdb	Proteobacteria	Gammaproteobacteria	Enterobacterales	Yersiniaceae	Yersinia	Yersinia enterocolitica
GCA_001171185.1_5116_3_5_genomic.fna	gtdb	Proteobacteria	Gammaproteobacteria	Enterobacterales	Yersiniaceae	Yersinia	Yersinia enterocolitica
GCA_001245685.1_12971_8_30_genomic.fna	gtdb	Proteobacteria	Gammaproteobacteria	Enterobacterales	Enterobacteriaceae	Shigella	Shigella sonnei
GCA_001220185.1_4976_1_11_genomic.fna	gtdb	Proteobacteria	Gammaproteobacteria	Enterobacterales	Yersiniaceae	Yersinia	Yersinia enterocolitica
GCA_001153385.1_4821_5_2_genomic.fna	gtdb	Proteobacteria	Gammaproteobacteria	Enterobacterales	Yersiniaceae	Yersinia	Yersinia intermedia
GCA_001077695.1_ASM107769v1_genomic.fna	gtdb	Proteobacteria	Gammaproteobacteria	Alteromonadales	Alteromonadaceae	Alteromonas	Alteromonas macleodii
GCA_001058455.1_ASM105845v1_genomic.fna	gtdb	Actinobacteria	Actinobacteria	Corynebacteriales	Corynebacteriaceae	Corynebacterium	Corynebacterium striatum
GCA_001077275.1_ASM107727v1_genomic.fna	gtdb	Firmicutes	Bacilli	Lactobacillales	Leuconostocaceae	Leuconostoc	Leuconostoc citreum
GCA_001249355.1_12971_8_69_genomic.fna	gtdb	Proteobacteria	Gammaproteobacteria	Enterobacterales	Enterobacteriaceae	Shigella	Shigella sonnei
GCA_001064835.1_ASM106483v1_genomic.fna	gtdb	Proteobacteria	Gammaproteobacteria	Enterobacterales	Yersiniaceae	Serratia	Serratia marcescens
GCA_001246385.1_5417_3_1_genomic.fna	gtdb	Proteobacteria	Gammaproteobacteria	Enterobacterales	Enterobacteriaceae	Shigella	Shigella sonnei
GCA_001140765.1_4821_5_11_genomic.fna	gtdb	Proteobacteria	Gammaproteobacteria	Enterobacterales	Yersiniaceae	Yersinia	Yersinia intermedia
GCA_001248345.1_8290_4_87_genomic.fna	gtdb	Proteobacteria	Gammaproteobacteria	Enterobacterales	Enterobacteriaceae	Shigella	Shigella sonnei
GCA_001248725.1_9870_6_5_genomic.fna	gtdb	Proteobacteria	Gammaproteobacteria	Enterobacterales	Enterobacteriaceae	Shigella	Shigella sonnei
GCA_001062845.1_ASM106284v1_genomic.fna	gtdb	Proteobacteria	Gammaproteobacteria	Pseudomonadales	Moraxellaceae	Moraxella	Moraxella catarrhalis
GCA_001248315.1_5236_3_11_genomic.fna	gtdb	Proteobacteria	Gammaproteobacteria	Enterobacterales	Enterobacteriaceae	Shigella	Shigella sonnei
GCA_001071115.1_ASM107111v1_genomic.fna	gtdb	Proteobacteria	Gammaproteobacteria	Xanthomonadales	Xanthomonadaceae	Stenotrophomonas	Stenotrophomonas maltophilia
GCA_001060765.1_ASM106076v1_genomic.fna	gtdb	Proteobacteria	Gammaproteobacteria	Enterobacterales	Morganellaceae	Proteus	Proteus mirabilis
GCA_001249115.1_12971_8_80_genomic.fna	gtdb	Proteobacteria	Gammaproteobacteria	Enterobacterales	Enterobacteriaceae	Shigella	Shigella sonnei
GCA_001059955.1_ASM105995v1_genomic.fna	gtdb	Actinobacteria	Actinobacteria	Corynebacteriales	Corynebacteriaceae	Corynebacterium	Corynebacterium striatum
GCA_001247905.1_12971_8_78_genomic.fna	gtdb	Proteobacteria	Gammaproteobacteria	Enterobacterales	Enterobacteriaceae	Shigella	Shigella sonnei
GCA_001055995.1_ASM105599v1_genomic.fna	gtdb	Actinobacteria	Actinobacteria	Corynebacteriales	Corynebacteriaceae	Corynebacterium	Corynebacterium jeikeium
GCA_001222805.1_4976_1_1_genomic.fna	gtdb	Proteobacteria	Gammaproteobacteria	Enterobacterales	Yersiniaceae	Yersinia	Yersinia enterocolitica
GCA_001168925.1_5116_3_7_genomic.fna	gtdb	Proteobacteria	Gammaproteobacteria	Enterobacterales	Yersiniaceae	Yersinia	Yersinia enterocolitica
GCA_001125325.1_5103_7_5_genomic.fna	gtdb	Proteobacteria	Gammaproteobacteria	Enterobacterales	Yersiniaceae	Yersinia	Yersinia enterocolitica
GCA_001248685.1_8290_4_4_genomic.fna	gtdb	Proteobacteria	Gammaproteobacteria	Enterobacterales	Enterobacteriaceae	Shigella	Shigella sonnei
GCA_001223425.1_5749_7_2_genomic.fna	gtdb	Proteobacteria	Gammaproteobacteria	Enterobacterales	Yersiniaceae	Yersinia	Yersinia enterocolitica
GCA_000473025.1_ASM47302v1_genomic.fna	gtdb	Proteobacteria	Alphaproteobacteria	Rhizobiales	Bradyrhizobiaceae	Bradyrhizobium	Bradyrhizobium diazoefficiens
GCA_000425645.1_ASM42564v1_genomic.fna	gtdb	Bacteroidetes	Flavobacteriia	Flavobacteriales	Flavobacteriaceae	Gaetbulibacter	Gaetbulibacter saemankumensis
GCA_000455225.1_Megasphaera_massiliensis_genomic.fna	gtdb	Firmicutes	Negativicutes	Veillonellales	Veillonellaceae	Megasphaera	Megasphaera massiliensis
GCA_000465615.2_GS_De_Novo_Assembly_genomic.fna	gtdb	Proteobacteria	Gammaproteobacteria	Enterobacterales	Yersiniaceae	Serratia	Serratia marcescens
GCA_000427825.1_ASM42782v1_genomic.fna	gtdb	Actinobacteria	Actinobacteria	Pseudonocardiales	Pseudonocardiaceae	Thermocrispum	Thermocrispum municipale
GCA_000473105.1_ASM47310v1_genomic.fna	gtdb	Proteobacteria	Alphaproteobacteria	Rhodobacterales	Rhodobacteraceae	Phaeobacter	Phaeobacter inhibens
GCA_000472965.1_ASM47296v1_genomic.fna	gtdb	Proteobacteria	Alphaproteobacteria	Rhizobiales	Bradyrhizobiaceae	Bradyrhizobium	Bradyrhizobium elkanii
GCA_000480035.1_Bruc_suis_06-791-1309_V1_genomic.fna	gtdb	Proteobacteria	Alphaproteobacteria	Rhizobiales	Brucellaceae	Brucella	Brucella suis
GCA_000473425.1_ASM47342v1_genomic.fna	gtdb	Proteobacteria	Alphaproteobacteria	Rhizobiales	Rhizobiaceae	Sinorhizobium	Sinorhizobium meliloti
GCA_000447435.2_ASM44743v2_genomic.fna	gtdb	Proteobacteria	Gammaproteobacteria	Aeromonadales	Aeromonadaceae	Aeromonas	Aeromonas salmonicida
GCA_000467955.1_ASM46795v1_genomic.fna	gtdb	Bacteroidetes	Bacteroidia	Bacteroidales	Porphyromonadaceae	Porphyromonas	Porphyromonas gingivalis
GCA_000425185.1_ASM42518v1_genomic.fna	gtdb	Proteobacteria	Alphaproteobacteria	Rhizobiales	Methylocystaceae	Pleomorphomonas	Pleomorphomonas koreensis
GCA_000428885.1_ASM42888v1_genomic.fna	gtdb	Acidobacteria	Holophagae	Holophagales	Holophagaceae	Geothrix	Geothrix fermentans
GCA_000447885.1_LLT1.01_genomic.fna	gtdb	Firmicutes	Bacilli	Lactobacillales	Streptococcaceae	Lactococcus	Lactococcus lactis
GCA_000429065.1_ASM42906v1_genomic.fna	gtdb	Proteobacteria	Gammaproteobacteria	Xanthomonadales	Xanthomonadaceae	Silanimonas	Silanimonas lenta
GCA_000467245.1_Shigella_dysenteriae_strain_SD1D_genomic.fna	gtdb	Proteobacteria	Gammaproteobacteria	Enterobacterales	Enterobacteriaceae	Shigella	Shigella dysenteriae
GCA_000429125.1_ASM42912v1_genomic.fna	gtdb	Bacteroidetes	Flavobacteriia	Flavobacteriales	Flavobacteriaceae	Aequorivita	Aequorivita capsosiphonis
GCA_000473205.1_ASM47320v1_genomic.fna	gtdb	Proteobacteria	Alphaproteobacteria	Rhodobacterales	Rhodobacteraceae	Pseudophaeobacter	Pseudophaeobacter arcticus
GCA_000443105.1_MhD38v2_genomic.fna	gtdb	Proteobacteria	Gammaproteobacteria	Pasteurellales	Pasteurellaceae	Mannheimia	Mannheimia haemolytica
GCA_000468055.1_ASM46805v1_genomic.fna	gtdb	Spirochaetes	Spirochaetia	Spirochaetales	Spirochaetaceae	Treponema	Treponema lecithinolyticum
GCA_000421725.1_ASM42172v1_genomic.fna	gtdb	Firmicutes	Clostridia	Thermoanaerobacterales	Thermoanaerobacterales Family III. Incertae Sedis	Caldicellulosiruptor	Caldicellulosiruptor acetigenus
GCA_000464785.1_NC407_1_genomic.fna	gtdb	Cyanobacteria	NA	Oscillatoriales	Microcoleaceae	Planktothrix	Planktothrix rubescens
GCA_000478885.1_ASM47888v1_genomic.fna	gtdb	Actinobacteria	Coriobacteriia	Eggerthellales	Eggerthellaceae	Adlercreutzia	Adlercreutzia equolifaciens
GCA_000421625.1_ASM42162v1_genomic.fna	gtdb	Deinococcus-Thermus	Deinococci	Thermales	Thermaceae	Thermus	Thermus islandicus
GCA_000472485.1_ASM47248v1_genomic.fna	gtdb	Bacteroidetes	Cytophagia	Cytophagales	Hymenobacteraceae	Pontibacter	Pontibacter actiniarum
GCA_000468595.1_Cbal13_1.0_genomic.fna	gtdb	Bacteroidetes	Flavobacteriia	Flavobacteriales	Flavobacteriaceae	Cellulophaga	Cellulophaga baltica
GCA_000447905.1_LLDT2.01_genomic.fna	gtdb	Firmicutes	Bacilli	Lactobacillales	Streptococcaceae	Lactococcus	Lactococcus lactis
GCA_000421285.1_ASM42128v1_genomic.fna	gtdb	Proteobacteria	Deltaproteobacteria	Desulfobacterales	Desulfobacteraceae	Desulfotignum	Desulfotignum balticum
GCA_000479285.1_Fuso_nucl_CTI-1_V1_genomic.fna	gtdb	Fusobacteria	Fusobacteriia	Fusobacteriales	Fusobacteriaceae	Fusobacterium	Fusobacterium nucleatum
GCA_000451885.2_ASM45188v2_genomic.fna	gtdb	Firmicutes	Clostridia	Clostridiales	Peptostreptococcaceae	Clostridioides	Clostridioides difficile
GCA_000428705.1_ASM42870v1_genomic.fna	gtdb	Tenericutes	Mollicutes	Acholeplasmatales	Acholeplasmataceae	Acholeplasma	Acholeplasma axanthum
GCA_000472605.1_ASM47260v1_genomic.fna	gtdb	Proteobacteria	Alphaproteobacteria	Pelagibacterales	Pelagibacteraceae	Candidatus Pelagibacter	Candidatus Pelagibacter ubique
GCA_000429865.1_ASM42986v1_genomic.fna	gtdb	Proteobacteria	Alphaproteobacteria	Rhizobiales	Hyphomicrobiaceae	Cucumibacter	Cucumibacter marinus
GCA_000427645.1_ASM42764v1_genomic.fna	gtdb	Proteobacteria	Alphaproteobacteria	Sphingomonadales	Sphingomonadaceae	Sphingomonas	Sphingomonas phyllosphaerae
GCA_000423065.1_ASM42306v1_genomic.fna	gtdb	Bacteroidetes	Flavobacteriia	Flavobacteriales	Flavobacteriaceae	Gramella	Gramella echinicola
GCA_000428665.1_ASM42866v1_genomic.fna	gtdb	Proteobacteria	Gammaproteobacteria	Xanthomonadales	Xanthomonadaceae	Xylella	Xylella fastidiosa
GCA_000427745.1_ASM42774v1_genomic.fna	gtdb	Proteobacteria	Alphaproteobacteria	Rhizobiales	Rhizobiaceae	Sinorhizobium	Sinorhizobium meliloti
GCA_000465555.2_GS_De_Novo_Assembly_genomic.fna	gtdb	Proteobacteria	Gammaproteobacteria	Enterobacterales	Erwiniaceae	Pantoea	Pantoea dispersa
GCA_000427485.1_ASM42748v1_genomic.fna	gtdb	Proteobacteria	Alphaproteobacteria	Rhizobiales	Rhizobiaceae	Sinorhizobium	Sinorhizobium meliloti
GCA_000423905.1_ASM42390v1_genomic.fna	gtdb	Deinococcus-Thermus	Deinococci	Thermales	Thermaceae	Thermus	Thermus antranikianii
GCA_000472865.1_ASM47286v1_genomic.fna	gtdb	Proteobacteria	Alphaproteobacteria	Rhizobiales	Bradyrhizobiaceae	Bradyrhizobium	Bradyrhizobium elkanii
GCA_000466185.1_ASM46618v1_genomic.fna	gtdb	Actinobacteria	Actinobacteria	Actinomycetales	Actinomycetaceae	Actinomyces	Actinomyces graevenitzii
GCA_000449565.2_ASM44956v2_genomic.fna	gtdb	Firmicutes	Clostridia	Clostridiales	Peptostreptococcaceae	Clostridioides	Clostridioides difficile
GCA_000439225.1_AtWRT31V1.0_genomic.fna	gtdb	Proteobacteria	Alphaproteobacteria	Rhizobiales	Rhizobiaceae	Agrobacterium	Agrobacterium tumefaciens
GCA_000422265.1_ASM42226v1_genomic.fna	gtdb	Bacteroidetes	Flavobacteriia	Flavobacteriales	Flavobacteriaceae	Chryseobacterium	Chryseobacterium palustre
GCA_000478275.1_AO9412_01_genomic.fna	gtdb	Actinobacteria	Actinobacteria	Pseudonocardiales	Pseudonocardiaceae	Amycolatopsis	Amycolatopsis orientalis
GCA_000425425.1_ASM42542v1_genomic.fna	gtdb	Bacteroidetes	Flavobacteriia	Flavobacteriales	Flavobacteriaceae	Flavobacterium	Flavobacterium daejeonense
GCA_000474945.1_ASM47494v1_genomic.fna	gtdb	Proteobacteria	Gammaproteobacteria	Nevskiales	Sinobacteraceae	Solimonas	Solimonas soli
GCA_000426465.1_ASM42646v1_genomic.fna	gtdb	Bacteroidetes	Flavobacteriia	Flavobacteriales	Flavobacteriaceae	Chryseobacterium	Chryseobacterium caeni
GCA_000422305.1_ASM42230v1_genomic.fna	gtdb	Proteobacteria	Gammaproteobacteria	Xanthomonadales	Xanthomonadaceae	Luteimonas	Luteimonas mephitis
GCA_000421545.1_ASM42154v1_genomic.fna	gtdb	Actinobacteria	Actinobacteria	Micrococcales	Microbacteriaceae	Agromyces	Agromyces italicus
GCA_000474215.1_ASM47421v1_genomic.fna	gtdb	Proteobacteria	Gammaproteobacteria	Enterobacterales	Hafniaceae	Edwardsiella	Edwardsiella hoshinae
GCA_000471625.1_PsAq1.0_genomic.fna	gtdb	Proteobacteria	Gammaproteobacteria	Pseudomonadales	Moraxellaceae	Psychrobacter	Psychrobacter aquaticus
GCA_000472565.1_ASM47256v1_genomic.fna	gtdb	Proteobacteria	Alphaproteobacteria	Pelagibacterales	Pelagibacteraceae	Candidatus Pelagibacter	Candidatus Pelagibacter ubique
GCA_000423005.1_ASM42300v1_genomic.fna	gtdb	Bacteroidetes	Flavobacteriia	Flavobacteriales	Flavobacteriaceae	Gelidibacter	Gelidibacter mesophilus
GCA_000427465.1_ASM42746v1_genomic.fna	gtdb	Proteobacteria	Alphaproteobacteria	Rhizobiales	Rhizobiaceae	Sinorhizobium	Sinorhizobium arboris
GCA_000423485.1_ASM42348v1_genomic.fna	gtdb	Actinobacteria	Actinobacteria	Propionibacteriales	Propionibacteriaceae	Propionimicrobium	Propionimicrobium lymphophilum
GCA_000463645.1_TM16_assembly2012_genomic.fna	gtdb	Actinobacteria	Actinobacteria	Propionibacteriales	Propionibacteriaceae	Cutibacterium	Cutibacterium avidum
GCA_000427445.1_ASM42744v1_genomic.fna	gtdb	Proteobacteria	Alphaproteobacteria	Rhizobiales	Beijerinckiaceae	Methylocapsa	Methylocapsa acidiphila
GCA_000421525.1_ASM42152v1_genomic.fna	gtdb	Actinobacteria	Actinobacteria	Propionibacteriales	Propionibacteriaceae	Aestuariimicrobium	Aestuariimicrobium kwangyangense
GCA_000450105.2_ASM45010v2_genomic.fna	gtdb	Firmicutes	Clostridia	Clostridiales	Peptostreptococcaceae	Clostridioides	Clostridioides difficile
GCA_000422365.1_ASM42236v1_genomic.fna	gtdb	Bacteroidetes	Flavobacteriia	Flavobacteriales	Flavobacteriaceae	Mesoflavibacter	Mesoflavibacter zeaxanthinifaciens
GCA_000424685.1_ASM42468v1_genomic.fna	gtdb	Proteobacteria	Gammaproteobacteria	Methylococcales	Methylococcaceae	Methylococcus	Methylococcus capsulatus
GCA_000475035.1_ASM47503v1_genomic.fna	gtdb	Proteobacteria	Gammaproteobacteria	Enterobacterales	Erwiniaceae	Pantoea	Pantoea ananatis
GCA_000480055.1_Bruc_suis_04-0115_V1_genomic.fna	gtdb	Proteobacteria	Alphaproteobacteria	Rhizobiales	Brucellaceae	Brucella	Brucella suis
GCA_000478545.1_ASM47854v1_genomic.fna	gtdb	Proteobacteria	Gammaproteobacteria	Enterobacterales	Yersiniaceae	Serratia	Serratia plymuthica
GCA_000480215.1_Bruc_meli_11-1823-3434_V1_genomic.fna	gtdb	Proteobacteria	Alphaproteobacteria	Rhizobiales	Brucellaceae	Brucella	Brucella melitensis
GCA_000470885.1_RhoBCP1_1.0_genomic.fna	gtdb	Actinobacteria	Actinobacteria	Corynebacteriales	Nocardiaceae	Rhodococcus	Rhodococcus aetherivorans
GCA_000422945.1_ASM42294v1_genomic.fna	gtdb	Bacteroidetes	Sphingobacteriia	Sphingobacteriales	Sphingobacteriaceae	Pedobacter	Pedobacter oryzae
GCA_000421645.1_ASM42164v1_genomic.fna	gtdb	Proteobacteria	Alphaproteobacteria	Rhizobiales	Aurantimonadaceae	Aurantimonas	Aurantimonas coralicida
GCA_000421185.1_ASM42118v1_genomic.fna	gtdb	Actinobacteria	Actinobacteria	Micrococcales	Intrasporangiaceae	Ornithinimicrobium	Ornithinimicrobium pekingense
GCA_000430025.1_ASM43002v1_genomic.fna	gtdb	Bacteroidetes	Flavobacteriia	Flavobacteriales	Flavobacteriaceae	Flavobacterium	Flavobacterium suncheonense
GCA_000468755.1_OprofF0195v1.0_genomic.fna	gtdb	Actinobacteria	Coriobacteriia	Coriobacteriales	Atopobiaceae	Olsenella	Olsenella profusa
GCA_000422685.1_ASM42268v1_genomic.fna	gtdb	Bacteroidetes	Flavobacteriia	Flavobacteriales	Flavobacteriaceae	Flavobacterium	Flavobacterium gelidilacus
GCA_000452325.2_ASM45232v2_genomic.fna	gtdb	Firmicutes	Clostridia	Clostridiales	Peptostreptococcaceae	Clostridioides	Clostridioides difficile
GCA_000442845.1_LLA12V1_genomic.fna	gtdb	Firmicutes	Bacilli	Lactobacillales	Streptococcaceae	Lactococcus	Lactococcus lactis
GCA_000423705.1_ASM42370v1_genomic.fna	gtdb	Proteobacteria	Alphaproteobacteria	Rhodobacterales	Rhodobacteraceae	Stappia	Stappia stellulata
GCA_000480095.1_Bruc_meli_02-5863-1_V1_genomic.fna	gtdb	Proteobacteria	Alphaproteobacteria	Rhizobiales	Brucellaceae	Brucella	Brucella melitensis
GCA_000445475.1_Version_1_of_the_Sulfurimonas_hongkongensis_AST-10_genome_genomic.fna	gtdb	Proteobacteria	Epsilonproteobacteria	Campylobacterales	Helicobacteraceae	Sulfurimonas	Sulfurimonas hongkongensis
GCA_000423445.1_ASM42344v1_genomic.fna	gtdb	Actinobacteria	Actinobacteria	Propionibacteriales	Propionibacteriaceae	Acidipropionibacterium	Acidipropionibacterium thoenii
GCA_000480155.1_Bruc_suis_97-9757_V1_genomic.fna	gtdb	Proteobacteria	Alphaproteobacteria	Rhizobiales	Brucellaceae	Brucella	Brucella suis
GCA_000443185.1_MhSwine2000v2_genomic.fna	gtdb	Proteobacteria	Gammaproteobacteria	Pasteurellales	Pasteurellaceae	Mannheimia	Mannheimia haemolytica
GCA_000421705.1_ASM42170v1_genomic.fna	gtdb	Proteobacteria	Alphaproteobacteria	Caulobacterales	Caulobacteraceae	Brevundimonas	Brevundimonas naejangsanensis
GCA_000479245.1_Fuso_nucl_CTI-3_V1_genomic.fna	gtdb	Fusobacteria	Fusobacteriia	Fusobacteriales	Fusobacteriaceae	Fusobacterium	Fusobacterium nucleatum
GCA_000426845.1_ASM42684v1_genomic.fna	gtdb	Proteobacteria	Alphaproteobacteria	Rhizobiales	Bradyrhizobiaceae	Bradyrhizobium	Bradyrhizobium japonicum
GCA_000480175.1_Bruc_abor_89-2646-1238_V1_genomic.fna	gtdb	Proteobacteria	Alphaproteobacteria	Rhizobiales	Brucellaceae	Brucella	Brucella abortus
GCA_000479225.1_Fuso_nucl_CTI-5_V1_genomic.fna	gtdb	Fusobacteria	Fusobacteriia	Fusobacteriales	Fusobacteriaceae	Fusobacterium	Fusobacterium nucleatum
GCA_000472025.1_Gordonia_amicalis_CCMA-559_genomic.fna	gtdb	Actinobacteria	Actinobacteria	Corynebacteriales	Gordoniaceae	Gordonia	Gordonia amicalis
GCA_000454725.1_ibidis.assembly_genomic.fna	gtdb	Chlamydiae	Chlamydiia	Chlamydiales	Chlamydiaceae	Chlamydia	Chlamydia ibidis
GCA_000427365.1_ASM42736v1_genomic.fna	gtdb	Bacteroidetes	Bacteroidia	Bacteroidales	Rikenellaceae	Rikenella	Rikenella microfusus
GCA_000427605.1_ASM42760v1_genomic.fna	gtdb	Proteobacteria	Gammaproteobacteria	Cellvibrionales	Cellvibrionaceae	Teredinibacter	Teredinibacter turnerae
GCA_000472985.1_ASM47298v1_genomic.fna	gtdb	Proteobacteria	Alphaproteobacteria	Rhizobiales	Bradyrhizobiaceae	Bradyrhizobium	Bradyrhizobium japonicum
GCA_000429005.1_ASM42900v1_genomic.fna	gtdb	Proteobacteria	Alphaproteobacteria	Sphingomonadales	Sphingomonadaceae	Novosphingobium	Novosphingobium acidiphilum
GCA_000422885.1_ASM42288v1_genomic.fna	gtdb	Proteobacteria	Betaproteobacteria	Burkholderiales	Comamonadaceae	Ottowia	Ottowia thiooxydans
GCA_000468635.1_PbaroF0067v1.0_genomic.fna	gtdb	Bacteroidetes	Bacteroidia	Bacteroidales	Prevotellaceae	Prevotella	Prevotella baroniae
GCA_000467795.1_ASM46779v1_genomic.fna	gtdb	Bacteroidetes	Bacteroidia	Bacteroidales	Porphyromonadaceae	Porphyromonas	Porphyromonas gingivalis
GCA_000468115.1_TsocrATCC35536v1.0_genomic.fna	gtdb	Spirochaetes	Spirochaetia	Spirochaetales	Spirochaetaceae	Treponema	Treponema socranskii
GCA_000472765.1_ASM47276v1_genomic.fna	gtdb	Proteobacteria	Alphaproteobacteria	Rhizobiales	Bradyrhizobiaceae	Bradyrhizobium	Bradyrhizobium elkanii
GCA_000424885.1_ASM42488v1_genomic.fna	gtdb	Actinobacteria	Actinobacteria	Micromonosporales	Micromonosporaceae	Salinispora	Salinispora arenicola
GCA_000451105.2_ASM45110v2_genomic.fna	gtdb	Firmicutes	Clostridia	Clostridiales	Peptostreptococcaceae	Clostridioides	Clostridioides difficile
GCA_000422985.1_ASM42298v1_genomic.fna	gtdb	Proteobacteria	Alphaproteobacteria	Sphingomonadales	Erythrobacteraceae	Porphyrobacter	Porphyrobacter cryptus
GCA_000427625.1_ASM42762v1_genomic.fna	gtdb	Proteobacteria	Gammaproteobacteria	Methylococcales	Methylococcaceae	Methylobacter	Methylobacter luteus
GCA_000450365.2_ASM45036v2_genomic.fna	gtdb	Firmicutes	Clostridia	Clostridiales	Peptostreptococcaceae	Clostridioides	Clostridioides difficile
GCA_000472685.1_ASM47268v1_genomic.fna	gtdb	Proteobacteria	Alphaproteobacteria	Rhizobiales	Bradyrhizobiaceae	Bradyrhizobium	Bradyrhizobium arachidis
GCA_000443085.1_MhD35v2_genomic.fna	gtdb	Proteobacteria	Gammaproteobacteria	Pasteurellales	Pasteurellaceae	Mannheimia	Mannheimia haemolytica
GCA_000472365.1_ASM47236v1_genomic.fna	gtdb	Proteobacteria	Alphaproteobacteria	Rhizobiales	Phyllobacteriaceae	Mesorhizobium	Mesorhizobium ciceri
GCA_000428465.1_ASM42846v1_genomic.fna	gtdb	Proteobacteria	Betaproteobacteria	Burkholderiales	Burkholderiaceae	Chitinimonas	Chitinimonas koreensis
GCA_000428005.1_ASM42800v1_genomic.fna	gtdb	Proteobacteria	Alphaproteobacteria	Rhizobiales	Rhizobiaceae	Sinorhizobium	Sinorhizobium meliloti
GCA_000423345.1_ASM42334v1_genomic.fna	gtdb	Proteobacteria	Gammaproteobacteria	Cellvibrionales	Cellvibrionaceae	Marinimicrobium	Marinimicrobium agarilyticum
GCA_000425585.1_ASM42558v1_genomic.fna	gtdb	Bacteroidetes	Chitinophagia	Chitinophagales	Chitinophagaceae	Terrimonas	Terrimonas ferruginea
GCA_000455805.1_ASM45580v1_genomic.fna	gtdb	Actinobacteria	Actinobacteria	Corynebacteriales	Corynebacteriaceae	Corynebacterium	Corynebacterium diphtheriae
GCA_000421565.1_ASM42156v1_genomic.fna	gtdb	Actinobacteria	Actinobacteria	Micrococcales	Microbacteriaceae	Agromyces	Agromyces subbeticus
GCA_000473145.1_ASM47314v1_genomic.fna	gtdb	Proteobacteria	Alphaproteobacteria	Rhodobacterales	Rhodobacteraceae	Leisingera	Leisingera daeponensis
GCA_000464765.1_NC406_1_genomic.fna	gtdb	Cyanobacteria	NA	Oscillatoriales	Microcoleaceae	Planktothrix	Planktothrix prolifica
GCA_000428505.1_ASM42850v1_genomic.fna	gtdb	Proteobacteria	Gammaproteobacteria	Oceanospirillales	Halomonadaceae	Halomonas	Halomonas anticariensis
GCA_000421845.1_ASM42184v1_genomic.fna	gtdb	Actinobacteria	Actinobacteria	Micrococcales	Microbacteriaceae	Leucobacter	Leucobacter chironomi
GCA_000476315.1_UTAD54_1_genomic.fna	gtdb	Proteobacteria	Gammaproteobacteria	Enterobacterales	Yersiniaceae	Serratia	Serratia fonticola
GCA_000473165.1_ASM47316v1_genomic.fna	gtdb	Proteobacteria	Alphaproteobacteria	Rhodobacterales	Rhodobacteraceae	Leisingera	Leisingera aquimarina
GCA_000442515.1_PhaespirillumFulvum_1.0_genomic.fna	gtdb	Proteobacteria	Alphaproteobacteria	Rhodospirillales	Rhodospirillaceae	Phaeospirillum	Phaeospirillum fulvum
GCA_000429405.1_ASM42940v1_genomic.fna	gtdb	Bacteroidetes	Cytophagia	Cytophagales	Cyclobacteriaceae	Algoriphagus	Algoriphagus marincola
GCA_000467835.1_ASM46783v1_genomic.fna	gtdb	Bacteroidetes	Bacteroidia	Bacteroidales	Porphyromonadaceae	Porphyromonas	Porphyromonas gingivalis
GCA_000473955.1__oprFasNSB1_genomic.fna	gtdb	Bacteroidetes	Bacteroidia	Bacteroidales	Barnesiellaceae	Coprobacter	Coprobacter fastidiosus
GCA_000473405.1_ASM47340v1_genomic.fna	gtdb	Proteobacteria	Alphaproteobacteria	Rhizobiales	Rhizobiaceae	Sinorhizobium	Sinorhizobium meliloti
GCA_000423645.1_ASM42364v1_genomic.fna	gtdb	Proteobacteria	Alphaproteobacteria	Rhodobacterales	Rhodobacteraceae	Sediminimonas	Sediminimonas qiaohouensis
GCA_000425045.1_ASM42504v1_genomic.fna	gtdb	Firmicutes	Negativicutes	Acidaminococcales	Acidaminococcaceae	Acidaminococcus	Acidaminococcus intestini
GCA_000425465.1_ASM42546v1_genomic.fna	gtdb	Bacteroidetes	Flavobacteriia	Flavobacteriales	Flavobacteriaceae	Flavobacterium	Flavobacterium filum
GCA_000475115.2_YP113_v2_genomic.fna	gtdb	Proteobacteria	Gammaproteobacteria	Enterobacterales	Yersiniaceae	Yersinia	Yersinia pestis
GCA_000425485.1_ASM42548v1_genomic.fna	gtdb	Bacteroidetes	Flavobacteriia	Flavobacteriales	Flavobacteriaceae	Flavobacterium	Flavobacterium tegetincola
GCA_000442275.2_Thalar_genomic.fna	gtdb	Proteobacteria	Alphaproteobacteria	Rhodobacterales	Rhodobacteraceae	Litoreibacter	Litoreibacter arenae
GCA_000421305.1_ASM42130v1_genomic.fna	gtdb	Proteobacteria	Alphaproteobacteria	Rhizobiales	Bradyrhizobiaceae	Bradyrhizobium	Bradyrhizobium japonicum
GCA_000445065.1_ASM44506v1_genomic.fna	gtdb	Proteobacteria	Alphaproteobacteria	Sphingomonadales	Sphingomonadaceae	Sphingobium	Sphingobium quisquiliarum
GCA_000429105.1_ASM42910v1_genomic.fna	gtdb	Actinobacteria	Actinobacteria	Actinomycetales	Actinomycetaceae	Schaalia	Schaalia suimastitidis
GCA_000426805.1_ASM42680v1_genomic.fna	gtdb	Proteobacteria	Gammaproteobacteria	Cellvibrionales	Cellvibrionaceae	Teredinibacter	Teredinibacter turnerae
GCA_000423365.1_ASM42336v1_genomic.fna	gtdb	Proteobacteria	Alphaproteobacteria	Rhizobiales	Hyphomicrobiaceae	Maritalea	Maritalea myrionectae
GCA_000426925.1_Acir310F_genomic.fna	gtdb	Cyanobacteria	NA	Nostocales	Aphanizomenonaceae	Dolichospermum	Dolichospermum circinale
GCA_000429965.1_ASM42996v1_genomic.fna	gtdb	Proteobacteria	Deltaproteobacteria	Desulfobacterales	Desulfobulbaceae	Desulfobulbus	Desulfobulbus mediterraneus
GCA_000480135.1_Bruc_suis_06-997-1672_V1_genomic.fna	gtdb	Proteobacteria	Alphaproteobacteria	Rhizobiales	Brucellaceae	Brucella	Brucella suis
GCA_000425145.1_ASM42514v1_genomic.fna	gtdb	Bacteroidetes	Sphingobacteriia	Sphingobacteriales	Sphingobacteriaceae	Pedobacter	Pedobacter glucosidilyticus
GCA_000430825.1_ASM43082v1_genomic.fna	gtdb	Bacteroidetes	Flavobacteriia	Flavobacteriales	Flavobacteriaceae	Chryseobacterium	Chryseobacterium daeguense
GCA_000450565.2_ASM45056v2_genomic.fna	gtdb	Firmicutes	Clostridia	Clostridiales	Peptostreptococcaceae	Clostridioides	Clostridioides difficile
GCA_000426505.1_ASM42650v1_genomic.fna	gtdb	Proteobacteria	Alphaproteobacteria	Rhodospirillales	Rhodospirillaceae	Nisaea	Nisaea denitrificans
GCA_000467975.1_ASM46797v1_genomic.fna	gtdb	Bacteroidetes	Bacteroidia	Bacteroidales	Porphyromonadaceae	Porphyromonas	Porphyromonas gingivalis
GCA_000470745.1_version_1_of_the_Halomonas_huanghegensis_genomic.fna	gtdb	Proteobacteria	Gammaproteobacteria	Oceanospirillales	Halomonadaceae	Halomonas	Halomonas huangheensis
GCA_000427585.1_ASM42758v1_genomic.fna	gtdb	Proteobacteria	Alphaproteobacteria	Rhizobiales	Rhizobiaceae	Sinorhizobium	Sinorhizobium meliloti
GCA_000443225.1_MhBrainv2_genomic.fna	gtdb	Proteobacteria	Gammaproteobacteria	Pasteurellales	Pasteurellaceae	Mannheimia	Mannheimia haemolytica
GCA_000426865.1_ASM42686v1_genomic.fna	gtdb	Proteobacteria	Deltaproteobacteria	Desulfuromonadales	Geobacteraceae	Geobacter	Geobacter bremensis
GCA_000428865.1_ASM42886v1_genomic.fna	gtdb	Firmicutes	Bacilli	Lactobacillales	Aerococcaceae	Eremococcus	Eremococcus coleocola
GCA_000479975.1_Bruc_meli_02-7258_V1_genomic.fna	gtdb	Proteobacteria	Alphaproteobacteria	Rhizobiales	Brucellaceae	Brucella	Brucella melitensis
GCA_000420765.1_ASM42076v1_genomic.fna	gtdb	Proteobacteria	Alphaproteobacteria	Sphingomonadales	Sphingomonadaceae	Sandarakinorhabdus	Sandarakinorhabdus limnophila
GCA_000473225.1_ASM47322v1_genomic.fna	gtdb	Proteobacteria	Alphaproteobacteria	Rhodobacterales	Rhodobacteraceae	Sedimentitalea	Sedimentitalea nanhaiensis
GCA_000427705.1_ASM42770v1_genomic.fna	gtdb	Proteobacteria	Alphaproteobacteria	Rhizobiales	Rhizobiaceae	Rhizobium	Rhizobium leguminosarum
GCA_000427195.1_ASM42719v1_genomic.fna	gtdb	Proteobacteria	Betaproteobacteria	Burkholderiales	Burkholderiaceae	Ralstonia	Ralstonia solanacearum
GCA_000420625.1_ASM42062v1_genomic.fna	gtdb	Proteobacteria	Alphaproteobacteria	Rhodospirillales	Rhodospirillaceae	Fodinicurvata	Fodinicurvata sediminis
GCA_000442985.1_AtP4V1.0_genomic.fna	gtdb	Proteobacteria	Alphaproteobacteria	Rhizobiales	Rhizobiaceae	Agrobacterium	Agrobacterium tumefaciens
GCA_000422285.1_ASM42228v1_genomic.fna	gtdb	Proteobacteria	Deltaproteobacteria	Desulfobacterales	Desulfobacteraceae	Desulfatiglans	Desulfatiglans anilini
GCA_000450405.2_ASM45040v2_genomic.fna	gtdb	Firmicutes	Clostridia	Clostridiales	Peptostreptococcaceae	Clostridioides	Clostridioides difficile
GCA_000420665.1_ASM42066v1_genomic.fna	gtdb	Proteobacteria	Alphaproteobacteria	Rhodobacterales	Hyphomonadaceae	Ponticaulis	Ponticaulis koreensis
GCA_000430545.1_ASM43054v1_genomic.fna	gtdb	Bacteroidetes	Flavobacteriia	Flavobacteriales	Flavobacteriaceae	Tenacibaculum	Tenacibaculum ovolyticum
GCA_000478765.1_PtemJ3_1.0_genomic.fna	gtdb	Proteobacteria	Gammaproteobacteria	Enterobacterales	Morganellaceae	Photorhabdus	Photorhabdus temperata
GCA_000473915.1_Prescottia_equi_Genome_sequencing_genomic.fna	gtdb	Actinobacteria	Actinobacteria	Corynebacteriales	Nocardiaceae	Rhodococcus	Rhodococcus hoagii
GCA_000423565.1_ASM42356v1_genomic.fna	gtdb	Bacteroidetes	Cytophagia	Cytophagales	Cytophagaceae	Runella	Runella zeae
GCA_000423505.1_ASM42350v1_genomic.fna	gtdb	Actinobacteria	Actinobacteria	Micrococcales	Microbacteriaceae	Pseudoclavibacter	Pseudoclavibacter soli
GCA_000427665.1_ASM42766v1_genomic.fna	gtdb	Proteobacteria	Alphaproteobacteria	Rhodospirillales	Geminicoccaceae	Geminicoccus	Geminicoccus roseus
GCA_000423805.1_ASM42380v1_genomic.fna	gtdb	Proteobacteria	Alphaproteobacteria	Rhodospirillales	Rhodospirillaceae	Thalassobaculum	Thalassobaculum salexigens
GCA_000472705.1_ASM47270v1_genomic.fna	gtdb	Proteobacteria	Alphaproteobacteria	Rhizobiales	Phyllobacteriaceae	Mesorhizobium	Mesorhizobium erdmanii
GCA_000467815.1_ASM46781v1_genomic.fna	gtdb	Bacteroidetes	Bacteroidia	Bacteroidales	Porphyromonadaceae	Porphyromonas	Porphyromonas gingivalis
GCA_000430645.1_ASM43064v1_genomic.fna	gtdb	Bacteroidetes	Flavobacteriia	Flavobacteriales	Flavobacteriaceae	Aquimarina	Aquimarina latercula
GCA_000467995.1_ASM46799v1_genomic.fna	gtdb	Bacteroidetes	Bacteroidia	Bacteroidales	Porphyromonadaceae	Porphyromonas	Porphyromonas gingivalis
GCA_000478845.1_FT_99A_genomic.fna	gtdb	Proteobacteria	Gammaproteobacteria	Thiotrichales	Francisellaceae	Francisella	Francisella tularensis
GCA_000426585.1_ASM42658v1_genomic.fna	gtdb	Bacteroidetes	Bacteroidia	Bacteroidales	Prevotellaceae	Prevotella	Prevotella baroniae
GCA_000429445.1_ASM42944v1_genomic.fna	gtdb	Bacteroidetes	Cytophagia	Cytophagales	Cyclobacteriaceae	Algoriphagus	Algoriphagus terrigena
GCA_000426225.1_ASM42622v1_genomic.fna	gtdb	Proteobacteria	Deltaproteobacteria	Desulfobacterales	Desulfobacteraceae	Desulforegula	Desulforegula conservatrix
GCA_000472785.1_ASM47278v1_genomic.fna	gtdb	Proteobacteria	Alphaproteobacteria	Rhizobiales	Phyllobacteriaceae	Mesorhizobium	Mesorhizobium loti
GCA_000420685.1_ASM42068v1_genomic.fna	gtdb	Actinobacteria	Actinobacteria	Corynebacteriales	Gordoniaceae	Gordonia	Gordonia hirsuta
GCA_000463315.1_B_cell_WH2_1.0_genomic.fna	gtdb	Bacteroidetes	Bacteroidia	Bacteroidales	Bacteroidaceae	Bacteroides	Bacteroides cellulosilyticus
GCA_000473365.1_ASM47336v1_genomic.fna	gtdb	Bacteroidetes	Cytophagia	Cytophagales	Hymenobacteraceae	Adhaeribacter	Adhaeribacter aquaticus
GCA_000473325.1_ASM47332v1_genomic.fna	gtdb	Proteobacteria	Alphaproteobacteria	Rhodobacterales	Rhodobacteraceae	Leisingera	Leisingera caerulea
GCA_000424745.1_ASM42474v1_genomic.fna	gtdb	Actinobacteria	Actinobacteria	Micromonosporales	Micromonosporaceae	Salinispora	Salinispora arenicola
GCA_000422805.1_ASM42280v1_genomic.fna	gtdb	Actinobacteria	Actinobacteria	Propionibacteriales	Nocardioidaceae	Nocardioides	Nocardioides halotolerans
GCA_000420745.1_ASM42074v1_genomic.fna	gtdb	Proteobacteria	Alphaproteobacteria	Rhodobacterales	Rhodobacteraceae	Pseudorhodobacter	Pseudorhodobacter ferrugineus
GCA_000464845.1_NC98_2_genomic.fna	gtdb	Cyanobacteria	NA	Oscillatoriales	Microcoleaceae	Planktothrix	Planktothrix prolifica
GCA_000472745.1_ASM47274v1_genomic.fna	gtdb	Proteobacteria	Alphaproteobacteria	Rhizobiales	Bradyrhizobiaceae	Bradyrhizobium	Bradyrhizobium japonicum
GCA_000464665.1_NC15_1_genomic.fna	gtdb	Cyanobacteria	NA	Oscillatoriales	Microcoleaceae	Planktothrix	Planktothrix agardhii
GCA_000474655.1_Dickeya1.0_genomic.fna	gtdb	Proteobacteria	Gammaproteobacteria	Enterobacterales	Pectobacteriaceae	Dickeya	Dickeya solani
GCA_000429165.1_ASM42916v1_genomic.fna	gtdb	Proteobacteria	Alphaproteobacteria	Rhodospirillales	Acetobacteraceae	Acetobacter	Acetobacter nitrogenifigens
GCA_000473005.1_ASM47300v1_genomic.fna	gtdb	Proteobacteria	Alphaproteobacteria	Rhizobiales	Bradyrhizobiaceae	Bradyrhizobium	Bradyrhizobium elkanii
GCA_000472725.1_ASM47272v1_genomic.fna	gtdb	Proteobacteria	Alphaproteobacteria	Rhizobiales	Bradyrhizobiaceae	Bradyrhizobium	Bradyrhizobium ottawaense
GCA_000443205.1_MhD193v2_genomic.fna	gtdb	Proteobacteria	Gammaproteobacteria	Pasteurellales	Pasteurellaceae	Mannheimia	Mannheimia haemolytica
GCA_000472945.1_ASM47294v1_genomic.fna	gtdb	Proteobacteria	Alphaproteobacteria	Rhizobiales	Bradyrhizobiaceae	Bradyrhizobium	Bradyrhizobium japonicum
GCA_000427925.1_ASM42792v1_genomic.fna	gtdb	Proteobacteria	Alphaproteobacteria	Rhizobiales	Rhizobiaceae	Rhizobium	Rhizobium mesoamericanum
GCA_000473085.1_ASM47308v1_genomic.fna	gtdb	Proteobacteria	Alphaproteobacteria	Rhizobiales	Xanthobacteraceae	Azorhizobium	Azorhizobium doebereinerae
GCA_000469645.1_ASM46964v1_genomic.fna	gtdb	Actinobacteria	Actinobacteria	Corynebacteriales	Nocardiaceae	Rhodococcus	Rhodococcus rhodochrous
GCA_000426365.1_ASM42636v1_genomic.fna	gtdb	Proteobacteria	Gammaproteobacteria	Xanthomonadales	Xanthomonadaceae	Arenimonas	Arenimonas composti
GCA_000472585.1_ASM47258v1_genomic.fna	gtdb	Proteobacteria	Alphaproteobacteria	Pelagibacterales	Pelagibacteraceae	Candidatus Pelagibacter	Candidatus Pelagibacter ubique
GCA_000428765.1_ASM42876v1_genomic.fna	gtdb	Proteobacteria	Alphaproteobacteria	Caulobacterales	Caulobacteraceae	Brevundimonas	Brevundimonas aveniformis
GCA_000423845.1_ASM42384v1_genomic.fna	gtdb	Thermodesulfobacteria	Thermodesulfobacteria	Thermodesulfobacteriales	Thermodesulfobacteriaceae	Thermodesulfobacterium	Thermodesulfobacterium hveragerdense
GCA_000423045.1_ASM42304v1_genomic.fna	gtdb	Bacteroidetes	Flavobacteriia	Flavobacteriales	Flavobacteriaceae	Gramella	Gramella portivictoriae
GCA_000443165.1_TT_genomic.fna	gtdb	Proteobacteria	Betaproteobacteria	Rhodocyclales	Zoogloeaceae	Thauera	Thauera terpenica
GCA_000429925.1_ASM42992v1_genomic.fna	gtdb	Proteobacteria	Deltaproteobacteria	Desulfobacterales	Desulfobacteraceae	Desulfatirhabdium	Desulfatirhabdium butyrativorans
GCA_000425105.1_ASM42510v1_genomic.fna	gtdb	Actinobacteria	Actinobacteria	Micrococcales	Microbacteriaceae	Agrococcus	Agrococcus lahaulensis
GCA_000439555.1_ASM43955v1_genomic.fna	gtdb	Proteobacteria	Gammaproteobacteria	Alteromonadales	Alteromonadaceae	Alteromonas	Alteromonas mediterranea
GCA_001713215.1_ASM171321v1_genomic.fna	gtdb	Spirochaetes	Spirochaetia	Spirochaetales	Spirochaetaceae	Treponema	Treponema pallidum
GCA_001679365.1_ASM167936v1_genomic.fna	gtdb	Proteobacteria	Gammaproteobacteria	Pasteurellales	Pasteurellaceae	Haemophilus	Haemophilus influenzae
GCA_001681955.1_ASM168195v1_genomic.fna	gtdb	Proteobacteria	Alphaproteobacteria	Rhodobacterales	Rhodobacteraceae	Epibacterium	Epibacterium mobile
GCA_001680765.1_ASM168076v1_genomic.fna	gtdb	Proteobacteria	Gammaproteobacteria	Pasteurellales	Pasteurellaceae	Aggregatibacter	Aggregatibacter aphrophilus
GCA_001676875.1_ASM167687v1_genomic.fna	gtdb	Proteobacteria	Betaproteobacteria	Neisseriales	Chromobacteriaceae	Chromobacterium	Chromobacterium subtsugae
GCA_001703535.1_ASM170353v1_genomic.fna	gtdb	Firmicutes	Bacilli	Bacillales	Listeriaceae	Brochothrix	Brochothrix thermosphacta
GCA_001688145.1_ASM168814v1_genomic.fna	gtdb	Proteobacteria	Gammaproteobacteria	Enterobacterales	Enterobacteriaceae	Shigella	Shigella sonnei
GCA_001696935.1_FTUL005-SEQ-1-ASM-1_genomic.fna	gtdb	Proteobacteria	Gammaproteobacteria	Thiotrichales	Francisellaceae	Francisella	Francisella tularensis
GCA_001662055.1_ASM166205v1_genomic.fna	gtdb	Proteobacteria	Alphaproteobacteria	Rhizobiales	Rhizobiaceae	Rhizobium	Rhizobium bangladeshense
GCA_001698225.1_ASM169822v1_genomic.fna	gtdb	Actinobacteria	Actinobacteria	Corynebacteriales	Gordoniaceae	Gordonia	Gordonia terrae
GCA_001670545.1_ASM167054v1_genomic.fna	gtdb	Proteobacteria	Gammaproteobacteria	Pasteurellales	Pasteurellaceae	Pasteurella	Pasteurella multocida
GCA_001691555.1_ASM169155v1_genomic.fna	gtdb	Proteobacteria	Gammaproteobacteria	Enterobacterales	Erwiniaceae	Pantoea	Pantoea eucrina
GCA_001699795.1_ASM169979v1_genomic.fna	gtdb	Proteobacteria	Betaproteobacteria	Burkholderiales	Burkholderiaceae	Ralstonia	Ralstonia pickettii
GCA_001679805.1_ASM167980v1_genomic.fna	gtdb	Firmicutes	Clostridia	Clostridiales	Clostridiaceae	Clostridium	Clostridium paraputrificum
GCA_001679235.1_ASM167923v1_genomic.fna	gtdb	Proteobacteria	Gammaproteobacteria	Pasteurellales	Pasteurellaceae	Haemophilus	Haemophilus influenzae
GCA_001700315.1_ASM170031v1_genomic.fna	gtdb	Firmicutes	Bacilli	Bacillales	Planococcaceae	Caryophanon	Caryophanon tenue
GCA_001689265.1_ASM168926v1_genomic.fna	gtdb	Proteobacteria	Gammaproteobacteria	Enterobacterales	Enterobacteriaceae	Shigella	Shigella sonnei
GCA_001656035.1_ASM165603v1_genomic.fna	gtdb	Proteobacteria	Gammaproteobacteria	Enterobacterales	Yersiniaceae	Yersinia	Yersinia entomophaga
GCA_001681525.1_ASM168152v1_genomic.fna	gtdb	Proteobacteria	Alphaproteobacteria	Rhodobacterales	Rhodobacteraceae	Epibacterium	Epibacterium mobile
GCA_001715655.1_ASM171565v1_genomic.fna	gtdb	Firmicutes	Bacilli	Bacillales	Listeriaceae	Brochothrix	Brochothrix thermosphacta
GCA_001656505.1_ASM165650v1_genomic.fna	gtdb	Proteobacteria	Gammaproteobacteria	Pseudomonadales	Moraxellaceae	Moraxella	Moraxella catarrhalis
GCA_001685575.1_ASM168557v1_genomic.fna	gtdb	Proteobacteria	Gammaproteobacteria	Legionellales	Legionellaceae	Legionella	Legionella pneumophila
GCA_001715735.1_ASM171573v1_genomic.fna	gtdb	Firmicutes	Bacilli	Bacillales	Listeriaceae	Brochothrix	Brochothrix thermosphacta
GCA_001660965.1_ASM166096v1_genomic.fna	gtdb	Actinobacteria	Actinobacteria	Propionibacteriales	Propionibacteriaceae	Cutibacterium	Cutibacterium acnes
GCA_001682035.1_ASM168203v1_genomic.fna	gtdb	Proteobacteria	Alphaproteobacteria	Rhodobacterales	Rhodobacteraceae	Epibacterium	Epibacterium mobile
GCA_001686935.1_ASM168693v1_genomic.fna	gtdb	Bacteroidetes	Flavobacteriia	Flavobacteriales	Flavobacteriaceae	Flavobacterium	Flavobacterium glycines
GCA_001649125.1_ASM164912v1_genomic.fna	gtdb	Proteobacteria	Gammaproteobacteria	Enterobacterales	Enterobacteriaceae	Shigella	Shigella flexneri
GCA_001688475.1_ASM168847v1_genomic.fna	gtdb	Proteobacteria	Gammaproteobacteria	Enterobacterales	Enterobacteriaceae	Shigella	Shigella sonnei
GCA_001654915.1_Bfe51602_DRAFTv1_genomic.fna	gtdb	Proteobacteria	Gammaproteobacteria	Enterobacterales	Enterobacteriaceae	Buttiauxella	Buttiauxella ferragutiae
GCA_001653675.1_ASM165367v1_genomic.fna	gtdb	Proteobacteria	Gammaproteobacteria	Enterobacterales	Morganellaceae	Morganella	Morganella morganii
GCA_001670525.1_ASM167052v1_genomic.fna	gtdb	Proteobacteria	Gammaproteobacteria	Pasteurellales	Pasteurellaceae	Pasteurella	Pasteurella multocida
GCA_001686265.1_ER_CSP_1.0_genomic.fna	gtdb	Proteobacteria	Alphaproteobacteria	Rickettsiales	Anaplasmataceae	Ehrlichia	Ehrlichia ruminantium
GCA_001649175.1_ASM164917v1_genomic.fna	gtdb	Proteobacteria	Gammaproteobacteria	Enterobacterales	Enterobacteriaceae	Shigella	Shigella flexneri
GCA_001662285.1_ASM166228v1_genomic.fna	gtdb	Proteobacteria	Gammaproteobacteria	Oceanospirillales	Halomonadaceae	Halomonas	Halomonas caseinilytica
GCA_001693815.1_ASM169381v1_genomic.fna	gtdb	Actinobacteria	Actinobacteria	Propionibacteriales	Propionibacteriaceae	Tessaracoccus	Tessaracoccus lapidicaptus
GCA_001716015.1_ASM171601v1_genomic.fna	gtdb	Firmicutes	Bacilli	Bacillales	Listeriaceae	Brochothrix	Brochothrix thermosphacta
GCA_001689015.1_ASM168901v1_genomic.fna	gtdb	Proteobacteria	Gammaproteobacteria	Enterobacterales	Enterobacteriaceae	Shigella	Shigella sonnei
GCA_001650835.1_ASM165083v1_genomic.fna	gtdb	Proteobacteria	Alphaproteobacteria	Rhodobacterales	Rhodobacteraceae	Sulfitobacter	Sulfitobacter pontiacus
GCA_001650195.1_ASM165019v1_genomic.fna	gtdb	Cyanobacteria	NA	Synechococcales	Leptolyngbyaceae	Phormidesmis	Phormidesmis priestleyi
GCA_001715645.1_ASM171564v1_genomic.fna	gtdb	Firmicutes	Bacilli	Bacillales	Listeriaceae	Brochothrix	Brochothrix thermosphacta
GCA_001699865.1_ASM169986v1_genomic.fna	gtdb	Bacteroidetes	Bacteroidia	Bacteroidales	Bacteroidaceae	Bacteroides	Bacteroides fragilis
GCA_001688075.1_ASM168807v1_genomic.fna	gtdb	Proteobacteria	Gammaproteobacteria	Enterobacterales	Enterobacteriaceae	Shigella	Shigella sonnei
GCA_001671475.1_ASM167147v1_genomic.fna	gtdb	Proteobacteria	Alphaproteobacteria	Rhizobiales	Phyllobacteriaceae	Mesorhizobium	Mesorhizobium loti
GCA_001696955.1_FTUL002-SEQ-1-ASM-1_genomic.fna	gtdb	Proteobacteria	Gammaproteobacteria	Thiotrichales	Francisellaceae	Francisella	Francisella tularensis
GCA_001649215.1_ASM164921v1_genomic.fna	gtdb	Proteobacteria	Gammaproteobacteria	Enterobacterales	Enterobacteriaceae	Shigella	Shigella flexneri
GCA_001689355.1_ASM168935v1_genomic.fna	gtdb	Proteobacteria	Gammaproteobacteria	Enterobacterales	Enterobacteriaceae	Shigella	Shigella sonnei
GCA_001662905.1_ASM166290v1_genomic.fna	gtdb	Proteobacteria	Alphaproteobacteria	Rhodospirillales	Acetobacteraceae	Acetobacter	Acetobacter pasteurianus
GCA_001679415.1_ASM167941v1_genomic.fna	gtdb	Proteobacteria	Gammaproteobacteria	Pasteurellales	Pasteurellaceae	Haemophilus	Haemophilus influenzae
GCA_001686925.1_ASM168692v1_genomic.fna	gtdb	Bacteroidetes	Flavobacteriia	Flavobacteriales	Flavobacteriaceae	Flavobacterium	Flavobacterium piscis
GCA_001679275.1_ASM167927v1_genomic.fna	gtdb	Proteobacteria	Gammaproteobacteria	Pseudomonadales	Moraxellaceae	Moraxella	Moraxella osloensis
GCA_001659725.1_ASM165972v1_genomic.fna	gtdb	Proteobacteria	Betaproteobacteria	Burkholderiales	Burkholderiaceae	Polynucleobacter	Polynucleobacter wuianus
GCA_001649265.1_ASM164926v1_genomic.fna	gtdb	Proteobacteria	Gammaproteobacteria	Enterobacterales	Enterobacteriaceae	Shigella	Shigella flexneri
GCA_001681715.1_ASM168171v1_genomic.fna	gtdb	Proteobacteria	Alphaproteobacteria	Rhodobacterales	Rhodobacteraceae	Epibacterium	Epibacterium mobile
GCA_001670875.1_RCAD0127_genomic.fna	gtdb	Bacteroidetes	Flavobacteriia	Flavobacteriales	Flavobacteriaceae	Riemerella	Riemerella anatipestifer
GCA_001653715.1_ASM165371v1_genomic.fna	gtdb	Proteobacteria	Alphaproteobacteria	Rhizobiales	Methylobacteriaceae	Methylobacterium	Methylobacterium platani
GCA_001681255.1_ASM168125v1_genomic.fna	gtdb	Proteobacteria	Alphaproteobacteria	Rhodobacterales	Rhodobacteraceae	Epibacterium	Epibacterium mobile
GCA_001687935.1_ASM168793v1_genomic.fna	gtdb	Proteobacteria	Gammaproteobacteria	Enterobacterales	Enterobacteriaceae	Shigella	Shigella sonnei
GCA_001684415.1_ASM168441v1_genomic.fna	gtdb	Proteobacteria	Gammaproteobacteria	Xanthomonadales	Xanthomonadaceae	Xylella	Xylella fastidiosa
GCA_001660955.1_ASM166095v1_genomic.fna	gtdb	Actinobacteria	Actinobacteria	Propionibacteriales	Propionibacteriaceae	Cutibacterium	Cutibacterium acnes
GCA_001655315.1_ASM165531v1_genomic.fna	gtdb	Spirochaetes	Spirochaetia	Spirochaetales	Spirochaetaceae	Treponema	Treponema pallidum
GCA_001678995.1_ASM167899v1_genomic.fna	gtdb	Proteobacteria	Gammaproteobacteria	Pseudomonadales	Moraxellaceae	Moraxella	Moraxella atlantae
GCA_001688755.1_ASM168875v1_genomic.fna	gtdb	Proteobacteria	Gammaproteobacteria	Enterobacterales	Enterobacteriaceae	Shigella	Shigella sonnei
GCA_001712955.1_ASM171295v1_genomic.fna	gtdb	Spirochaetes	Spirochaetia	Spirochaetales	Spirochaetaceae	Treponema	Treponema pallidum
GCA_001713335.1_ASM171333v1_genomic.fna	gtdb	Spirochaetes	Spirochaetia	Spirochaetales	Spirochaetaceae	Treponema	Treponema pallidum
GCA_001688605.1_ASM168860v1_genomic.fna	gtdb	Proteobacteria	Gammaproteobacteria	Enterobacterales	Enterobacteriaceae	Shigella	Shigella sonnei
GCA_001656475.1_ASM165647v1_genomic.fna	gtdb	Proteobacteria	Gammaproteobacteria	Pseudomonadales	Moraxellaceae	Moraxella	Moraxella catarrhalis
GCA_001712915.1_ASM171291v1_genomic.fna	gtdb	Spirochaetes	Spirochaetia	Spirochaetales	Spirochaetaceae	Treponema	Treponema pallidum
GCA_001688115.1_ASM168811v1_genomic.fna	gtdb	Proteobacteria	Gammaproteobacteria	Enterobacterales	Enterobacteriaceae	Shigella	Shigella sonnei
GCA_001680805.1_ASM168080v1_genomic.fna	gtdb	Proteobacteria	Gammaproteobacteria	Pasteurellales	Pasteurellaceae	Aggregatibacter	Aggregatibacter aphrophilus
GCA_001730205.1_ASM173020v1_genomic.fna	gtdb	Proteobacteria	Gammaproteobacteria	Aeromonadales	Aeromonadaceae	Aeromonas	Aeromonas caviae
GCA_001681675.1_ASM168167v1_genomic.fna	gtdb	Proteobacteria	Alphaproteobacteria	Rhodobacterales	Rhodobacteraceae	Epibacterium	Epibacterium mobile
GCA_001688045.1_ASM168804v1_genomic.fna	gtdb	Proteobacteria	Gammaproteobacteria	Enterobacterales	Enterobacteriaceae	Shigella	Shigella sonnei
GCA_001670435.1_ASM167043v1_genomic.fna	gtdb	Proteobacteria	Gammaproteobacteria	Pasteurellales	Pasteurellaceae	Pasteurella	Pasteurella multocida
GCA_001672355.1_NZP2042_genomic.fna	gtdb	Proteobacteria	Alphaproteobacteria	Rhizobiales	Phyllobacteriaceae	Mesorhizobium	Mesorhizobium loti
GCA_001679065.1_ASM167906v1_genomic.fna	gtdb	Proteobacteria	Gammaproteobacteria	Pseudomonadales	Moraxellaceae	Moraxella	Moraxella atlantae
GCA_001656115.1_ASM165611v1_genomic.fna	gtdb	Proteobacteria	Gammaproteobacteria	Pseudomonadales	Moraxellaceae	Moraxella	Moraxella catarrhalis
GCA_001682055.1_ASM168205v1_genomic.fna	gtdb	Proteobacteria	Alphaproteobacteria	Rhodobacterales	Rhodobacteraceae	Epibacterium	Epibacterium mobile
GCA_001692245.1_ASM169224v1_genomic.fna	gtdb	Proteobacteria	Alphaproteobacteria	Rhizobiales	Rhizobiaceae	Agrobacterium	Agrobacterium tumefaciens
GCA_001703555.1_ASM170355v1_genomic.fna	gtdb	Firmicutes	Bacilli	Lactobacillales	Carnobacteriaceae	Carnobacterium	Carnobacterium divergens
GCA_001660865.1_ASM166086v1_genomic.fna	gtdb	Actinobacteria	Actinobacteria	Propionibacteriales	Propionibacteriaceae	Cutibacterium	Cutibacterium acnes
GCA_001656195.1_ASM165619v1_genomic.fna	gtdb	Proteobacteria	Gammaproteobacteria	Pseudomonadales	Moraxellaceae	Moraxella	Moraxella catarrhalis
GCA_001662875.1_ASM166287v1_genomic.fna	gtdb	Proteobacteria	Alphaproteobacteria	Rhodospirillales	Rhodospirillaceae	Thalassospira	Thalassospira tepidiphila
GCA_001670785.1_RCAD0183_genomic.fna	gtdb	Bacteroidetes	Flavobacteriia	Flavobacteriales	Flavobacteriaceae	Riemerella	Riemerella anatipestifer
GCA_001676315.1_ASM167631v1_genomic.fna	gtdb	Proteobacteria	Gammaproteobacteria	Xanthomonadales	Xanthomonadaceae	Stenotrophomonas	Stenotrophomonas maltophilia
GCA_001692265.1_ASM169226v1_genomic.fna	gtdb	Proteobacteria	Alphaproteobacteria	Rhizobiales	Rhizobiaceae	Agrobacterium	Agrobacterium tumefaciens
GCA_001679445.1_ASM167944v1_genomic.fna	gtdb	Proteobacteria	Gammaproteobacteria	Pasteurellales	Pasteurellaceae	Haemophilus	Haemophilus haemolyticus
GCA_001656425.1_ASM165642v1_genomic.fna	gtdb	Proteobacteria	Gammaproteobacteria	Pseudomonadales	Moraxellaceae	Moraxella	Moraxella catarrhalis
GCA_001670775.1_ASM167077v1_genomic.fna	gtdb	Proteobacteria	Gammaproteobacteria	Pasteurellales	Pasteurellaceae	Pasteurella	Pasteurella multocida
GCA_001671465.1_ASM167146v1_genomic.fna	gtdb	Proteobacteria	Alphaproteobacteria	Rhizobiales	Phyllobacteriaceae	Mesorhizobium	Mesorhizobium loti
GCA_001688135.1_ASM168813v1_genomic.fna	gtdb	Proteobacteria	Gammaproteobacteria	Enterobacterales	Enterobacteriaceae	Shigella	Shigella sonnei
GCA_001713135.1_ASM171313v1_genomic.fna	gtdb	Spirochaetes	Spirochaetia	Spirochaetales	Spirochaetaceae	Treponema	Treponema pallidum
GCA_001689085.1_ASM168908v1_genomic.fna	gtdb	Proteobacteria	Gammaproteobacteria	Enterobacterales	Enterobacteriaceae	Shigella	Shigella sonnei
GCA_001712975.1_ASM171297v1_genomic.fna	gtdb	Spirochaetes	Spirochaetia	Spirochaetales	Spirochaetaceae	Treponema	Treponema pallidum
GCA_001654865.1_Bno51607_DRAFTv1_genomic.fna	gtdb	Proteobacteria	Gammaproteobacteria	Enterobacterales	Enterobacteriaceae	Buttiauxella	Buttiauxella noackiae
GCA_001671485.1_ASM167148v1_genomic.fna	gtdb	Proteobacteria	Alphaproteobacteria	Rhizobiales	Phyllobacteriaceae	Mesorhizobium	Mesorhizobium loti
GCA_001681815.1_ASM168181v1_genomic.fna	gtdb	Proteobacteria	Alphaproteobacteria	Rhodobacterales	Rhodobacteraceae	Epibacterium	Epibacterium mobile
GCA_001679335.1_ASM167933v1_genomic.fna	gtdb	Proteobacteria	Gammaproteobacteria	Pasteurellales	Pasteurellaceae	Haemophilus	Haemophilus aegyptius
GCA_001671145.1_RCAD0121_genomic.fna	gtdb	Bacteroidetes	Flavobacteriia	Flavobacteriales	Flavobacteriaceae	Riemerella	Riemerella anatipestifer
GCA_001689225.1_ASM168922v1_genomic.fna	gtdb	Proteobacteria	Gammaproteobacteria	Enterobacterales	Enterobacteriaceae	Shigella	Shigella sonnei
GCA_001707485.1_ASM170748v1_genomic.fna	gtdb	Proteobacteria	Betaproteobacteria	Burkholderiales	Alcaligenaceae	Achromobacter	Achromobacter xylosoxidans
GCA_001663495.1_ASM166349v1_genomic.fna	gtdb	Actinobacteria	Actinobacteria	Corynebacteriales	Corynebacteriaceae	Corynebacterium	Corynebacterium pseudotuberculosis
GCA_001688105.1_ASM168810v1_genomic.fna	gtdb	Proteobacteria	Gammaproteobacteria	Enterobacterales	Enterobacteriaceae	Shigella	Shigella sonnei
GCA_001676385.1_ASM167638v1_genomic.fna	gtdb	Proteobacteria	Gammaproteobacteria	Xanthomonadales	Xanthomonadaceae	Stenotrophomonas	Stenotrophomonas maltophilia
GCA_001691475.1_ASM169147v1_genomic.fna	gtdb	Proteobacteria	Gammaproteobacteria	Legionellales	Legionellaceae	Legionella	Legionella jamestowniensis
GCA_001713315.1_ASM171331v1_genomic.fna	gtdb	Spirochaetes	Spirochaetia	Spirochaetales	Spirochaetaceae	Treponema	Treponema pallidum
GCA_001718205.1_ASM171820v1_genomic.fna	gtdb	Proteobacteria	Alphaproteobacteria	Rhizobiales	Bradyrhizobiaceae	Bradyrhizobium	Bradyrhizobium elkanii
GCA_001696805.1_ASM169680v1_genomic.fna	gtdb	Proteobacteria	Gammaproteobacteria	Enterobacterales	Morganellaceae	Photorhabdus	Photorhabdus australis
GCA_001685985.1_ASM168598v1_genomic.fna	gtdb	Actinobacteria	Actinobacteria	Bifidobacteriales	Bifidobacteriaceae	Bifidobacterium	Bifidobacterium pseudocatenulatum
GCA_001682005.1_ASM168200v1_genomic.fna	gtdb	Proteobacteria	Alphaproteobacteria	Rhodobacterales	Rhodobacteraceae	Epibacterium	Epibacterium mobile
GCA_001653095.1_ASM165309v1_genomic.fna	gtdb	Actinobacteria	Actinobacteria	Corynebacteriales	Mycobacteriaceae	Hoyosella	Hoyosella altamirensis
GCA_001689005.1_ASM168900v1_genomic.fna	gtdb	Proteobacteria	Gammaproteobacteria	Enterobacterales	Enterobacteriaceae	Shigella	Shigella sonnei
GCA_001687645.1_ASM168764v1_genomic.fna	gtdb	Actinobacteria	Actinobacteria	Corynebacteriales	Corynebacteriaceae	Corynebacterium	Corynebacterium glutamicum
GCA_001656215.1_ASM165621v1_genomic.fna	gtdb	Proteobacteria	Gammaproteobacteria	Pseudomonadales	Moraxellaceae	Moraxella	Moraxella catarrhalis
GCA_001691565.1_ASM169156v1_genomic.fna	gtdb	Actinobacteria	Actinobacteria	Micrococcales	Microbacteriaceae	Microbacterium	Microbacterium oleivorans
GCA_001703655.1_wgs1_genomic.fna	gtdb	Actinobacteria	Actinobacteria	Actinomycetales	Actinomycetaceae	Trueperella	Trueperella bernardiae
GCA_001696865.1_RSOL001-SEQ-1-ASM-1_genomic.fna	gtdb	Proteobacteria	Betaproteobacteria	Burkholderiales	Burkholderiaceae	Ralstonia	Ralstonia solanacearum
GCA_001703515.1_ASM170351v1_genomic.fna	gtdb	Firmicutes	Bacilli	Bacillales	Listeriaceae	Brochothrix	Brochothrix thermosphacta
GCA_001679105.1_ASM167910v1_genomic.fna	gtdb	Proteobacteria	Gammaproteobacteria	Pseudomonadales	Moraxellaceae	Moraxella	Moraxella catarrhalis
GCA_001686005.1_ASM168600v1_genomic.fna	gtdb	Actinobacteria	Actinobacteria	Bifidobacteriales	Bifidobacteriaceae	Bifidobacterium	Bifidobacterium pseudocatenulatum
GCA_001702335.1_ASM170233v1_genomic.fna	gtdb	Proteobacteria	Alphaproteobacteria	Rhizobiales	Brucellaceae	Brucella	Brucella melitensis
GCA_001699815.1_ASM169981v1_genomic.fna	gtdb	Proteobacteria	Betaproteobacteria	Burkholderiales	Burkholderiaceae	Ralstonia	Ralstonia pickettii
GCA_001670535.1_ASM167053v1_genomic.fna	gtdb	Proteobacteria	Gammaproteobacteria	Pasteurellales	Pasteurellaceae	Pasteurella	Pasteurella multocida
GCA_001649535.1_ASM164953v1_genomic.fna	gtdb	Proteobacteria	Alphaproteobacteria	Rhizobiales	Rhizobiaceae	Agrobacterium	Agrobacterium rhizogenes
GCA_001672605.1_ASM167260v1_genomic.fna	gtdb	Firmicutes	Bacilli	Lactobacillales	Lactobacillaceae	Pediococcus	Pediococcus acidilactici
GCA_001719615.1_ASM171961v1_genomic.fna	gtdb	Proteobacteria	Alphaproteobacteria	Rhodobacterales	Rhodobacteraceae	Neptunicoccus	Neptunicoccus sediminis
GCA_001688875.1_ASM168887v1_genomic.fna	gtdb	Proteobacteria	Gammaproteobacteria	Enterobacterales	Enterobacteriaceae	Shigella	Shigella sonnei
GCA_001656125.1_ASM165612v1_genomic.fna	gtdb	Proteobacteria	Gammaproteobacteria	Pseudomonadales	Moraxellaceae	Moraxella	Moraxella catarrhalis
GCA_001713055.1_ASM171305v1_genomic.fna	gtdb	Spirochaetes	Spirochaetia	Spirochaetales	Spirochaetaceae	Treponema	Treponema pallidum
GCA_001676295.1_ASM167629v1_genomic.fna	gtdb	Proteobacteria	Gammaproteobacteria	Xanthomonadales	Xanthomonadaceae	Stenotrophomonas	Stenotrophomonas maltophilia
GCA_001688785.1_ASM168878v1_genomic.fna	gtdb	Proteobacteria	Gammaproteobacteria	Enterobacterales	Enterobacteriaceae	Shigella	Shigella sonnei
GCA_001692445.1_ASM169244v1_genomic.fna	gtdb	Actinobacteria	Actinobacteria	Micrococcales	Cellulomonadaceae	Oerskovia	Oerskovia enterophila
GCA_001680885.1_ASM168088v1_genomic.fna	gtdb	Bacteroidetes	Flavobacteriia	Flavobacteriales	Flavobacteriaceae	Polaribacter	Polaribacter vadi
GCA_001681975.1_ASM168197v1_genomic.fna	gtdb	Proteobacteria	Alphaproteobacteria	Rhodobacterales	Rhodobacteraceae	Epibacterium	Epibacterium mobile
GCA_001681445.1_ASM168144v1_genomic.fna	gtdb	Proteobacteria	Alphaproteobacteria	Rhodobacterales	Rhodobacteraceae	Epibacterium	Epibacterium mobile
GCA_001688055.1_ASM168805v1_genomic.fna	gtdb	Proteobacteria	Gammaproteobacteria	Enterobacterales	Enterobacteriaceae	Shigella	Shigella sonnei
GCA_001707465.1_ASM170746v1_genomic.fna	gtdb	Proteobacteria	Betaproteobacteria	Burkholderiales	Alcaligenaceae	Achromobacter	Achromobacter insolitus
GCA_001685175.1_ASM168517v1_genomic.fna	gtdb	Firmicutes	Clostridia	Clostridiales	Clostridiaceae	Clostridium	Clostridium beijerinckii
GCA_001679405.1_ASM167940v1_genomic.fna	gtdb	Proteobacteria	Gammaproteobacteria	Pasteurellales	Pasteurellaceae	Haemophilus	Haemophilus parainfluenzae
GCA_001687825.1_ASM168782v1_genomic.fna	gtdb	Proteobacteria	Gammaproteobacteria	Enterobacterales	Enterobacteriaceae	Shigella	Shigella sonnei
GCA_001679325.1_ASM167932v1_genomic.fna	gtdb	Proteobacteria	Gammaproteobacteria	Pasteurellales	Pasteurellaceae	Haemophilus	Haemophilus parainfluenzae
GCA_001658125.1_ASM165812v1_genomic.fna	gtdb	Proteobacteria	Betaproteobacteria	Burkholderiales	Burkholderiaceae	Cupriavidus	Cupriavidus gilardii
GCA_001681995.1_ASM168199v1_genomic.fna	gtdb	Proteobacteria	Alphaproteobacteria	Rhodobacterales	Rhodobacteraceae	Epibacterium	Epibacterium mobile
GCA_001656455.1_ASM165645v1_genomic.fna	gtdb	Proteobacteria	Gammaproteobacteria	Pseudomonadales	Moraxellaceae	Moraxella	Moraxella catarrhalis
GCA_001655235.1_ASM165523v1_genomic.fna	gtdb	Spirochaetes	Spirochaetia	Spirochaetales	Spirochaetaceae	Treponema	Treponema pallidum
GCA_001688455.1_ASM168845v1_genomic.fna	gtdb	Proteobacteria	Gammaproteobacteria	Enterobacterales	Enterobacteriaceae	Shigella	Shigella sonnei
GCA_001655435.1_ASM165543v1_genomic.fna	gtdb	Spirochaetes	Spirochaetia	Spirochaetales	Spirochaetaceae	Treponema	Treponema pallidum
GCA_001650635.1_ASM165063v1_genomic.fna	gtdb	Proteobacteria	Alphaproteobacteria	Rhodospirillales	Rhodospirillaceae	Magnetospirillum	Magnetospirillum moscoviense
GCA_001675175.1_ASM167517v1_genomic.fna	gtdb	Proteobacteria	Alphaproteobacteria	Rhizobiales	Rhizobiaceae	Rhizobium	Rhizobium leucaenae
GCA_001688445.1_ASM168844v1_genomic.fna	gtdb	Proteobacteria	Gammaproteobacteria	Enterobacterales	Enterobacteriaceae	Shigella	Shigella sonnei
GCA_001688235.1_ASM168823v1_genomic.fna	gtdb	Proteobacteria	Gammaproteobacteria	Enterobacterales	Enterobacteriaceae	Shigella	Shigella sonnei
GCA_001715775.1_ASM171577v1_genomic.fna	gtdb	Firmicutes	Bacilli	Bacillales	Listeriaceae	Brochothrix	Brochothrix thermosphacta
GCA_001722255.1_ASM172225v1_genomic.fna	gtdb	Actinobacteria	Actinobacteria	Corynebacteriales	Corynebacteriaceae	Corynebacterium	Corynebacterium amycolatum
GCA_001713235.1_ASM171323v1_genomic.fna	gtdb	Spirochaetes	Spirochaetia	Spirochaetales	Spirochaetaceae	Treponema	Treponema pallidum
GCA_001681385.1_ASM168138v1_genomic.fna	gtdb	Proteobacteria	Alphaproteobacteria	Rhodobacterales	Rhodobacteraceae	Epibacterium	Epibacterium mobile
GCA_001670805.1_RCAD0147_genomic.fna	gtdb	Bacteroidetes	Flavobacteriia	Flavobacteriales	Flavobacteriaceae	Riemerella	Riemerella anatipestifer
GCA_001713035.1_ASM171303v1_genomic.fna	gtdb	Spirochaetes	Spirochaetia	Spirochaetales	Spirochaetaceae	Treponema	Treponema pallidum
GCA_001679135.1_ASM167913v1_genomic.fna	gtdb	Proteobacteria	Gammaproteobacteria	Pasteurellales	Pasteurellaceae	Haemophilus	Haemophilus haemolyticus
GCA_001679305.1_ASM167930v1_genomic.fna	gtdb	Proteobacteria	Gammaproteobacteria	Pasteurellales	Pasteurellaceae	Haemophilus	Haemophilus aegyptius
GCA_001670625.1_RCAD0125_genomic.fna	gtdb	Bacteroidetes	Flavobacteriia	Flavobacteriales	Flavobacteriaceae	Riemerella	Riemerella anatipestifer
GCA_001655055.1_Phe35613_DRAFTv1_genomic.fna	gtdb	Proteobacteria	Gammaproteobacteria	Enterobacterales	Morganellaceae	Providencia	Providencia heimbachae
GCA_001688385.1_ASM168838v1_genomic.fna	gtdb	Proteobacteria	Gammaproteobacteria	Enterobacterales	Enterobacteriaceae	Shigella	Shigella sonnei
GCA_001688395.1_ASM168839v1_genomic.fna	gtdb	Proteobacteria	Gammaproteobacteria	Enterobacterales	Enterobacteriaceae	Shigella	Shigella sonnei
GCA_001661915.1_ASM166191v1_genomic.fna	gtdb	Proteobacteria	Alphaproteobacteria	Sphingomonadales	Erythrobacteraceae	Croceicoccus	Croceicoccus pelagius
GCA_001656385.1_ASM165638v1_genomic.fna	gtdb	Proteobacteria	Gammaproteobacteria	Pseudomonadales	Moraxellaceae	Moraxella	Moraxella catarrhalis
GCA_001662525.1_C48_V1_genomic.fna	gtdb	Proteobacteria	Gammaproteobacteria	Pasteurellales	Pasteurellaceae	Pasteurella	Pasteurella multocida
GCA_001684955.1_ASM168495v1_genomic.fna	gtdb	Bacteroidetes	Flavobacteriia	Flavobacteriales	Flavobacteriaceae	Chryseobacterium	Chryseobacterium contaminans
GCA_001680775.1_ASM168077v1_genomic.fna	gtdb	Proteobacteria	Gammaproteobacteria	Pasteurellales	Pasteurellaceae	Haemophilus	Haemophilus parainfluenzae
GCA_001692405.1_ASM169240v1_genomic.fna	gtdb	Proteobacteria	Alphaproteobacteria	Rhizobiales	Rhizobiaceae	Agrobacterium	Agrobacterium tumefaciens
GCA_001649345.1_ASM164934v1_genomic.fna	gtdb	Proteobacteria	Gammaproteobacteria	Enterobacterales	Enterobacteriaceae	Shigella	Shigella flexneri
GCA_001670555.1_ASM167055v1_genomic.fna	gtdb	Proteobacteria	Gammaproteobacteria	Pasteurellales	Pasteurellaceae	Pasteurella	Pasteurella multocida
GCA_001681535.1_ASM168153v1_genomic.fna	gtdb	Proteobacteria	Alphaproteobacteria	Rhodobacterales	Rhodobacteraceae	Epibacterium	Epibacterium mobile
GCA_001683015.1_ASM168301v1_genomic.fna	gtdb	Proteobacteria	Alphaproteobacteria	Rhodobacterales	Rhodobacteraceae	Epibacterium	Epibacterium mobile
GCA_001722495.1_ASM172249v1_genomic.fna	gtdb	Proteobacteria	Gammaproteobacteria	Oceanospirillales	Halomonadaceae	Halomonas	Halomonas caseinilytica
GCA_001650715.1_ASM165071v1_genomic.fna	gtdb	Proteobacteria	Alphaproteobacteria	Rhodospirillales	Rhodospirillaceae	Magnetospirillum	Magnetospirillum marisnigri
GCA_001681755.1_ASM168175v1_genomic.fna	gtdb	Proteobacteria	Alphaproteobacteria	Rhodobacterales	Rhodobacteraceae	Epibacterium	Epibacterium mobile
GCA_001649555.1_ASM164955v1_genomic.fna	gtdb	Proteobacteria	Gammaproteobacteria	Enterobacterales	Yersiniaceae	Yersinia	Yersinia enterocolitica
GCA_001688865.1_ASM168886v1_genomic.fna	gtdb	Proteobacteria	Gammaproteobacteria	Enterobacterales	Enterobacteriaceae	Shigella	Shigella sonnei
GCA_001715445.1_ASM171544v1_genomic.fna	gtdb	Proteobacteria	Alphaproteobacteria	Rhizobiales	Brucellaceae	Brucella	Brucella canis
GCA_001681415.1_ASM168141v1_genomic.fna	gtdb	Proteobacteria	Alphaproteobacteria	Rhodobacterales	Rhodobacteraceae	Epibacterium	Epibacterium mobile
GCA_001688195.1_ASM168819v1_genomic.fna	gtdb	Proteobacteria	Gammaproteobacteria	Enterobacterales	Enterobacteriaceae	Shigella	Shigella sonnei
GCA_001679455.1_ASM167945v1_genomic.fna	gtdb	Proteobacteria	Gammaproteobacteria	Pasteurellales	Pasteurellaceae	Haemophilus	Haemophilus parainfluenzae
GCA_001676395.1_ASM167639v1_genomic.fna	gtdb	Proteobacteria	Gammaproteobacteria	Xanthomonadales	Xanthomonadaceae	Stenotrophomonas	Stenotrophomonas maltophilia
GCA_001696545.1_ASM169654v1_genomic.fna	gtdb	Proteobacteria	Alphaproteobacteria	Rhodobacterales	Rhodobacteraceae	Stappia	Stappia indica
GCA_001713155.1_ASM171315v1_genomic.fna	gtdb	Spirochaetes	Spirochaetia	Spirochaetales	Spirochaetaceae	Treponema	Treponema pallidum
GCA_001656175.1_ASM165617v1_genomic.fna	gtdb	Proteobacteria	Gammaproteobacteria	Pseudomonadales	Moraxellaceae	Moraxella	Moraxella catarrhalis
GCA_001715665.1_ASM171566v1_genomic.fna	gtdb	Firmicutes	Bacilli	Bacillales	Listeriaceae	Brochothrix	Brochothrix thermosphacta
GCA_001649295.1_ASM164929v1_genomic.fna	gtdb	Proteobacteria	Gammaproteobacteria	Enterobacterales	Enterobacteriaceae	Shigella	Shigella flexneri
GCA_001715715.1_ASM171571v1_genomic.fna	gtdb	Firmicutes	Bacilli	Bacillales	Listeriaceae	Brochothrix	Brochothrix thermosphacta
GCA_001650795.1_ASM165079v1_genomic.fna	gtdb	Proteobacteria	Alphaproteobacteria	Rhodobacterales	Rhodobacteraceae	Sulfitobacter	Sulfitobacter geojensis
GCA_001670445.1_ASM167044v1_genomic.fna	gtdb	Proteobacteria	Gammaproteobacteria	Pasteurellales	Pasteurellaceae	Pasteurella	Pasteurella multocida
GCA_001692965.1_ASM169296v1_genomic.fna	gtdb	Actinobacteria	Actinobacteria	Propionibacteriales	Propionibacteriaceae	Cutibacterium	Cutibacterium avidum
GCA_001681305.1_ASM168130v1_genomic.fna	gtdb	Proteobacteria	Alphaproteobacteria	Rhodobacterales	Rhodobacteraceae	Epibacterium	Epibacterium mobile
GCA_001723465.1_ASM172346v1_genomic.fna	gtdb	Actinobacteria	Actinobacteria	Corynebacteriales	Corynebacteriaceae	Corynebacterium	Corynebacterium diphtheriae
GCA_001670615.1_RCAD0188_genomic.fna	gtdb	Bacteroidetes	Flavobacteriia	Flavobacteriales	Flavobacteriaceae	Riemerella	Riemerella anatipestifer
GCA_001719645.1_ASM171964v1_genomic.fna	gtdb	Actinobacteria	Actinobacteria	Corynebacteriales	Corynebacteriaceae	Corynebacterium	Corynebacterium pseudotuberculosis
GCA_001653135.1_ASM165313v1_genomic.fna	gtdb	Proteobacteria	Gammaproteobacteria	Alteromonadales	Pseudoalteromonadaceae	Pseudoalteromonas	Pseudoalteromonas neustonica
GCA_001715725.1_ASM171572v1_genomic.fna	gtdb	Firmicutes	Bacilli	Bacillales	Listeriaceae	Brochothrix	Brochothrix thermosphacta
GCA_001681635.1_ASM168163v1_genomic.fna	gtdb	Proteobacteria	Alphaproteobacteria	Rhodobacterales	Rhodobacteraceae	Epibacterium	Epibacterium mobile
GCA_001702255.1_ASM170225v1_genomic.fna	gtdb	Proteobacteria	Alphaproteobacteria	Rhizobiales	Brucellaceae	Brucella	Brucella melitensis
GCA_001687995.1_ASM168799v1_genomic.fna	gtdb	Proteobacteria	Gammaproteobacteria	Enterobacterales	Enterobacteriaceae	Shigella	Shigella sonnei
GCA_001687875.1_ASM168787v1_genomic.fna	gtdb	Proteobacteria	Gammaproteobacteria	Enterobacterales	Enterobacteriaceae	Shigella	Shigella sonnei
GCA_001672055.1_ASM167205v1_genomic.fna	gtdb	Proteobacteria	Gammaproteobacteria	Enterobacterales	Yersiniaceae	Serratia	Serratia marcescens
GCA_001696845.1_RSOL003-SEQ-1-ASM-1_genomic.fna	gtdb	Proteobacteria	Betaproteobacteria	Burkholderiales	Burkholderiaceae	Ralstonia	Ralstonia solanacearum
GCA_001670725.1_RCAD0124_genomic.fna	gtdb	Bacteroidetes	Flavobacteriia	Flavobacteriales	Flavobacteriaceae	Riemerella	Riemerella anatipestifer
GCA_001681595.1_ASM168159v1_genomic.fna	gtdb	Proteobacteria	Alphaproteobacteria	Rhodobacterales	Rhodobacteraceae	Epibacterium	Epibacterium mobile
GCA_001681265.1_ASM168126v1_genomic.fna	gtdb	Proteobacteria	Alphaproteobacteria	Rhodobacterales	Rhodobacteraceae	Epibacterium	Epibacterium mobile
GCA_001683355.1_ASM168335v1_genomic.fna	gtdb	Bacteroidetes	Bacteroidia	Bacteroidales	Prevotellaceae	Prevotella	Prevotella scopos
GCA_001679175.1_ASM167917v1_genomic.fna	gtdb	Proteobacteria	Gammaproteobacteria	Pseudomonadales	Moraxellaceae	Moraxella	Moraxella osloensis
GCA_001696855.1_RSOL002-SEQ-1-ASM-1_genomic.fna	gtdb	Proteobacteria	Betaproteobacteria	Burkholderiales	Burkholderiaceae	Ralstonia	Ralstonia solanacearum
GCA_001670425.1_ASM167042v1_genomic.fna	gtdb	Proteobacteria	Gammaproteobacteria	Pasteurellales	Pasteurellaceae	Pasteurella	Pasteurella multocida
GCA_001702305.1_ASM170230v1_genomic.fna	gtdb	Proteobacteria	Alphaproteobacteria	Rhizobiales	Brucellaceae	Brucella	Brucella melitensis
GCA_001681905.1_ASM168190v1_genomic.fna	gtdb	Proteobacteria	Alphaproteobacteria	Rhodobacterales	Rhodobacteraceae	Epibacterium	Epibacterium mobile
GCA_001679345.1_ASM167934v1_genomic.fna	gtdb	Proteobacteria	Gammaproteobacteria	Pseudomonadales	Moraxellaceae	Moraxella	Moraxella catarrhalis
GCA_001713095.1_ASM171309v1_genomic.fna	gtdb	Spirochaetes	Spirochaetia	Spirochaetales	Spirochaetaceae	Treponema	Treponema pallidum
GCA_001655395.1_ASM165539v1_genomic.fna	gtdb	Spirochaetes	Spirochaetia	Spirochaetales	Spirochaetaceae	Treponema	Treponema pallidum
GCA_001686085.1_ASM168608v1_genomic.fna	gtdb	Actinobacteria	Actinobacteria	Bifidobacteriales	Bifidobacteriaceae	Bifidobacterium	Bifidobacterium dentium
GCA_001671525.1_ASM167152v1_genomic.fna	gtdb	Proteobacteria	Alphaproteobacteria	Rhizobiales	Phyllobacteriaceae	Mesorhizobium	Mesorhizobium loti
GCA_001676585.1_ASM167658v1_genomic.fna	gtdb	Cyanobacteria	NA	Nostocales	Aphanizomenonaceae	Cylindrospermopsis	Cylindrospermopsis raciborskii
GCA_001655515.1_ASM165551v1_genomic.fna	gtdb	Spirochaetes	Spirochaetia	Spirochaetales	Spirochaetaceae	Treponema	Treponema pallidum
GCA_001670685.1_RCAD0150_genomic.fna	gtdb	Bacteroidetes	Flavobacteriia	Flavobacteriales	Flavobacteriaceae	Riemerella	Riemerella anatipestifer
GCA_001672385.1_SU343_genomic.fna	gtdb	Proteobacteria	Alphaproteobacteria	Rhizobiales	Phyllobacteriaceae	Mesorhizobium	Mesorhizobium loti
GCA_001713195.1_ASM171319v1_genomic.fna	gtdb	Spirochaetes	Spirochaetia	Spirochaetales	Spirochaetaceae	Treponema	Treponema pallidum
GCA_001681685.1_ASM168168v1_genomic.fna	gtdb	Proteobacteria	Alphaproteobacteria	Rhodobacterales	Rhodobacteraceae	Epibacterium	Epibacterium mobile
GCA_001670455.1_ASM167045v1_genomic.fna	gtdb	Proteobacteria	Gammaproteobacteria	Pasteurellales	Pasteurellaceae	Pasteurella	Pasteurella multocida
GCA_001699885.1_ASM169988v1_genomic.fna	gtdb	Bacteroidetes	Bacteroidia	Bacteroidales	Bacteroidaceae	Bacteroides	Bacteroides fragilis
GCA_001655475.1_ASM165547v1_genomic.fna	gtdb	Spirochaetes	Spirochaetia	Spirochaetales	Spirochaetaceae	Treponema	Treponema pallidum
GCA_001681335.1_ASM168133v1_genomic.fna	gtdb	Proteobacteria	Alphaproteobacteria	Rhodobacterales	Rhodobacteraceae	Epibacterium	Epibacterium mobile
GCA_001713275.1_ASM171327v1_genomic.fna	gtdb	Spirochaetes	Spirochaetia	Spirochaetales	Spirochaetaceae	Treponema	Treponema pallidum
GCA_001688185.1_ASM168818v1_genomic.fna	gtdb	Proteobacteria	Gammaproteobacteria	Enterobacterales	Enterobacteriaceae	Shigella	Shigella sonnei
GCA_001712895.1_ASM171289v1_genomic.fna	gtdb	Spirochaetes	Spirochaetia	Spirochaetales	Spirochaetaceae	Treponema	Treponema pallidum
GCA_001715635.1_ASM171563v1_genomic.fna	gtdb	Firmicutes	Bacilli	Bacillales	Listeriaceae	Brochothrix	Brochothrix thermosphacta
GCA_001716895.1_ASM171689v1_genomic.fna	gtdb	Proteobacteria	Gammaproteobacteria	Enterobacterales	Yersiniaceae	Serratia	Serratia marcescens
GCA_001695355.1_ASM169535v1_genomic.fna	gtdb	Bacteroidetes	Bacteroidia	Bacteroidales	Bacteroidaceae	Bacteroides	Bacteroides fragilis
GCA_001649715.1_ASM164971v1_genomic.fna	gtdb	Firmicutes	Bacilli	Lactobacillales	Aerococcaceae	Aerococcus	Aerococcus urinae
GCA_001688975.1_ASM168897v1_genomic.fna	gtdb	Proteobacteria	Gammaproteobacteria	Enterobacterales	Enterobacteriaceae	Shigella	Shigella sonnei
GCA_001709345.1_ASM170934v1_genomic.fna	gtdb	Proteobacteria	Gammaproteobacteria	Oceanospirillales	NA	Terasakiispira	Terasakiispira papahanaumokuakeensis
GCA_001670855.1_RCAD0134_genomic.fna	gtdb	Bacteroidetes	Flavobacteriia	Flavobacteriales	Flavobacteriaceae	Riemerella	Riemerella anatipestifer
GCA_001681765.1_ASM168176v1_genomic.fna	gtdb	Proteobacteria	Alphaproteobacteria	Rhodobacterales	Rhodobacteraceae	Epibacterium	Epibacterium mobile
GCA_001681795.1_ASM168179v1_genomic.fna	gtdb	Proteobacteria	Alphaproteobacteria	Rhodobacterales	Rhodobacteraceae	Epibacterium	Epibacterium mobile
GCA_001689145.1_ASM168914v1_genomic.fna	gtdb	Proteobacteria	Gammaproteobacteria	Enterobacterales	Enterobacteriaceae	Shigella	Shigella sonnei
GCA_001687965.1_ASM168796v1_genomic.fna	gtdb	Proteobacteria	Gammaproteobacteria	Enterobacterales	Enterobacteriaceae	Shigella	Shigella sonnei
GCA_001681355.1_ASM168135v1_genomic.fna	gtdb	Proteobacteria	Alphaproteobacteria	Rhodobacterales	Rhodobacteraceae	Epibacterium	Epibacterium mobile
GCA_001688415.1_ASM168841v1_genomic.fna	gtdb	Proteobacteria	Gammaproteobacteria	Enterobacterales	Enterobacteriaceae	Shigella	Shigella sonnei
GCA_001681405.1_ASM168140v1_genomic.fna	gtdb	Proteobacteria	Alphaproteobacteria	Rhodobacterales	Rhodobacteraceae	Epibacterium	Epibacterium mobile
GCA_001654705.1_ASM165470v1_genomic.fna	gtdb	Proteobacteria	Betaproteobacteria	Burkholderiales	Alcaligenaceae	Achromobacter	Achromobacter xylosoxidans
GCA_001689195.1_ASM168919v1_genomic.fna	gtdb	Proteobacteria	Gammaproteobacteria	Enterobacterales	Enterobacteriaceae	Shigella	Shigella sonnei
GCA_001730215.1_ASM173021v1_genomic.fna	gtdb	Proteobacteria	Gammaproteobacteria	Aeromonadales	Aeromonadaceae	Aeromonas	Aeromonas caviae
GCA_001713015.1_ASM171301v1_genomic.fna	gtdb	Spirochaetes	Spirochaetia	Spirochaetales	Spirochaetaceae	Treponema	Treponema pallidum
GCA_001670735.1_RCAD0111_genomic.fna	gtdb	Bacteroidetes	Flavobacteriia	Flavobacteriales	Flavobacteriaceae	Riemerella	Riemerella anatipestifer
GCA_001653295.1_ASM165329v1_genomic.fna	gtdb	Actinobacteria	Actinobacteria	Corynebacteriales	Corynebacteriaceae	Corynebacterium	Corynebacterium pseudotuberculosis
GCA_001681845.1_ASM168184v1_genomic.fna	gtdb	Proteobacteria	Alphaproteobacteria	Rhodobacterales	Rhodobacteraceae	Epibacterium	Epibacterium mobile
GCA_001681875.1_ASM168187v1_genomic.fna	gtdb	Proteobacteria	Alphaproteobacteria	Rhodobacterales	Rhodobacteraceae	Epibacterium	Epibacterium mobile
GCA_001693695.1_ASM169369v1_genomic.fna	gtdb	Bacteroidetes	Bacteroidia	Bacteroidales	Bacteroidaceae	Bacteroides	Bacteroides fragilis
GCA_001715465.1_ASM171546v1_genomic.fna	gtdb	Proteobacteria	Alphaproteobacteria	Rhizobiales	Brucellaceae	Brucella	Brucella melitensis
GCA_001712995.1_ASM171299v1_genomic.fna	gtdb	Spirochaetes	Spirochaetia	Spirochaetales	Spirochaetaceae	Treponema	Treponema pallidum
GCA_001655005.1_Hpa29927_DRAFTv1_genomic.fna	gtdb	Proteobacteria	Gammaproteobacteria	Enterobacterales	Hafniaceae	Hafnia	Hafnia paralvei
GCA_001670695.1_RCAD0123_genomic.fna	gtdb	Bacteroidetes	Flavobacteriia	Flavobacteriales	Flavobacteriaceae	Riemerella	Riemerella anatipestifer
GCA_001692365.1_ASM169236v1_genomic.fna	gtdb	Proteobacteria	Alphaproteobacteria	Rhizobiales	Rhizobiaceae	Agrobacterium	Agrobacterium tumefaciens
GCA_001676375.1_ASM167637v1_genomic.fna	gtdb	Proteobacteria	Gammaproteobacteria	Xanthomonadales	Xanthomonadaceae	Stenotrophomonas	Stenotrophomonas maltophilia
GCA_001693415.1_ASM169341v1_genomic.fna	gtdb	Bacteroidetes	Flavobacteriia	Flavobacteriales	Flavobacteriaceae	Tenacibaculum	Tenacibaculum soleae
GCA_001689365.1_ASM168936v1_genomic.fna	gtdb	Proteobacteria	Gammaproteobacteria	Enterobacterales	Enterobacteriaceae	Shigella	Shigella sonnei
GCA_001688885.1_ASM168888v1_genomic.fna	gtdb	Proteobacteria	Gammaproteobacteria	Enterobacterales	Enterobacteriaceae	Shigella	Shigella sonnei
GCA_001676055.1_ASM167605v1_genomic.fna	gtdb	Proteobacteria	Gammaproteobacteria	Enterobacterales	Morganellaceae	Morganella	Morganella psychrotolerans
GCA_001715835.1_ASM171583v1_genomic.fna	gtdb	Firmicutes	Bacilli	Bacillales	Listeriaceae	Brochothrix	Brochothrix thermosphacta
GCA_001713115.1_ASM171311v1_genomic.fna	gtdb	Spirochaetes	Spirochaetia	Spirochaetales	Spirochaetaceae	Treponema	Treponema pallidum
GCA_001681475.1_ASM168147v1_genomic.fna	gtdb	Proteobacteria	Alphaproteobacteria	Rhodobacterales	Rhodobacteraceae	Epibacterium	Epibacterium mobile
GCA_001653315.1_ASM165331v1_genomic.fna	gtdb	Actinobacteria	Actinobacteria	Corynebacteriales	Corynebacteriaceae	Corynebacterium	Corynebacterium pseudotuberculosis
GCA_001649115.1_ASM164911v1_genomic.fna	gtdb	Proteobacteria	Gammaproteobacteria	Enterobacterales	Enterobacteriaceae	Shigella	Shigella flexneri
GCA_001651505.1_ISMMS7v1_genomic.fna	gtdb	Proteobacteria	Gammaproteobacteria	Xanthomonadales	Xanthomonadaceae	Stenotrophomonas	Stenotrophomonas maltophilia
GCA_001681735.1_ASM168173v1_genomic.fna	gtdb	Proteobacteria	Alphaproteobacteria	Rhodobacterales	Rhodobacteraceae	Epibacterium	Epibacterium mobile
GCA_001676435.1_ASM167643v1_genomic.fna	gtdb	Proteobacteria	Gammaproteobacteria	Xanthomonadales	Xanthomonadaceae	Stenotrophomonas	Stenotrophomonas maltophilia
GCA_001687865.1_ASM168786v1_genomic.fna	gtdb	Proteobacteria	Gammaproteobacteria	Enterobacterales	Enterobacteriaceae	Shigella	Shigella sonnei
GCA_001650325.1_ASM165032v1_genomic.fna	gtdb	Firmicutes	Bacilli	Bacillales	NA	Exiguobacterium	Exiguobacterium undae
GCA_001672365.1_ASM167236v1_genomic.fna	gtdb	Proteobacteria	Alphaproteobacteria	Rhizobiales	Phyllobacteriaceae	Mesorhizobium	Mesorhizobium loti
GCA_001715795.1_ASM171579v1_genomic.fna	gtdb	Firmicutes	Bacilli	Bacillales	Listeriaceae	Brochothrix	Brochothrix thermosphacta
GCA_001689325.1_ASM168932v1_genomic.fna	gtdb	Proteobacteria	Gammaproteobacteria	Enterobacterales	Enterobacteriaceae	Shigella	Shigella sonnei
GCA_001696925.1_FTUL004-SEQ-1-ASM-1_genomic.fna	gtdb	Proteobacteria	Gammaproteobacteria	Thiotrichales	Francisellaceae	Francisella	Francisella tularensis
GCA_001670605.1_RCAD0142_genomic.fna	gtdb	Bacteroidetes	Flavobacteriia	Flavobacteriales	Flavobacteriaceae	Riemerella	Riemerella anatipestifer
GCA_001655555.1_ASM165555v1_genomic.fna	gtdb	Spirochaetes	Spirochaetia	Spirochaetales	Spirochaetaceae	Treponema	Treponema pallidum
GCA_001703635.1_ASM170363v1_genomic.fna	gtdb	Proteobacteria	Alphaproteobacteria	Rhizobiales	Phyllobacteriaceae	Hoeflea	Hoeflea olei
GCA_001679205.1_ASM167920v1_genomic.fna	gtdb	Proteobacteria	Gammaproteobacteria	Pseudomonadales	Moraxellaceae	Moraxella	Moraxella osloensis
GCA_001684975.1_ASM168497v1_genomic.fna	gtdb	Bacteroidetes	Flavobacteriia	Flavobacteriales	Flavobacteriaceae	Chryseobacterium	Chryseobacterium artocarpi
GCA_001681515.1_ASM168151v1_genomic.fna	gtdb	Proteobacteria	Alphaproteobacteria	Rhodobacterales	Rhodobacteraceae	Epibacterium	Epibacterium mobile
GCA_001652265.1_ASM165226v1_genomic.fna	gtdb	Proteobacteria	Alphaproteobacteria	Rhizobiales	Rhizobiaceae	Rhizobium	Rhizobium leguminosarum
GCA_001679075.1_ASM167907v1_genomic.fna	gtdb	Proteobacteria	Gammaproteobacteria	Pseudomonadales	Moraxellaceae	Moraxella	Moraxella catarrhalis
GCA_001692425.1_ASM169242v1_genomic.fna	gtdb	Proteobacteria	Alphaproteobacteria	Rhizobiales	Rhizobiaceae	Agrobacterium	Agrobacterium tumefaciens
GCA_001730005.1_ASM173000v1_genomic.fna	gtdb	Firmicutes	Bacilli	Bacillales	Planococcaceae	Planococcus	Planococcus maritimus
GCA_001717765.1_ASM171776v1_genomic.fna	gtdb	Proteobacteria	Gammaproteobacteria	Alteromonadales	Alteromonadaceae	Marinobacter	Marinobacter adhaerens
GCA_001673685.1_ASM167368v1_genomic.fna	gtdb	Proteobacteria	Gammaproteobacteria	Aeromonadales	Aeromonadaceae	Aeromonas	Aeromonas dhakensis
GCA_001681235.1_ASM168123v1_genomic.fna	gtdb	Proteobacteria	Alphaproteobacteria	Rhodobacterales	Rhodobacteraceae	Epibacterium	Epibacterium mobile
GCA_001705905.1_ASM170590v1_genomic.fna	gtdb	Proteobacteria	Gammaproteobacteria	Aeromonadales	Aeromonadaceae	Aeromonas	Aeromonas hydrophila
GCA_001712935.1_ASM171293v1_genomic.fna	gtdb	Spirochaetes	Spirochaetia	Spirochaetales	Spirochaetaceae	Treponema	Treponema pallidum
GCA_001719065.1_ASM171906v1_genomic.fna	gtdb	Thermotogae	Thermotogae	Thermotogales	Fervidobacteriaceae	Fervidobacterium	Fervidobacterium thailandense
GCA_001677335.1_ASM167733v1_genomic.fna	gtdb	Proteobacteria	Alphaproteobacteria	Sphingomonadales	Erythrobacteraceae	Porphyrobacter	Porphyrobacter dokdonensis
GCA_001696535.1_ASM169653v1_genomic.fna	gtdb	Proteobacteria	Alphaproteobacteria	Rhodobacterales	Rhodobacteraceae	Stappia	Stappia indica
GCA_001696875.1_RSOL004-SEQ-1-ASM-1_genomic.fna	gtdb	Proteobacteria	Betaproteobacteria	Burkholderiales	Burkholderiaceae	Ralstonia	Ralstonia solanacearum
GCA_001681825.1_ASM168182v1_genomic.fna	gtdb	Proteobacteria	Alphaproteobacteria	Rhodobacterales	Rhodobacteraceae	Epibacterium	Epibacterium mobile
GCA_001681925.1_ASM168192v1_genomic.fna	gtdb	Proteobacteria	Alphaproteobacteria	Rhodobacterales	Rhodobacteraceae	Epibacterium	Epibacterium mobile
GCA_001699855.1_ASM169985v1_genomic.fna	gtdb	Bacteroidetes	Bacteroidia	Bacteroidales	Bacteroidaceae	Bacteroides	Bacteroides fragilis
GCA_001670865.1_ASM167086v1_genomic.fna	gtdb	Bacteroidetes	Flavobacteriia	Flavobacteriales	Flavobacteriaceae	Riemerella	Riemerella anatipestifer
GCA_001655275.1_ASM165527v1_genomic.fna	gtdb	Spirochaetes	Spirochaetia	Spirochaetales	Spirochaetaceae	Treponema	Treponema pallidum
GCA_001702075.2_ASM170207v2_genomic.fna	gtdb	Proteobacteria	Gammaproteobacteria	Pasteurellales	Pasteurellaceae	Haemophilus	Haemophilus quentini
GCA_001713295.1_ASM171329v1_genomic.fna	gtdb	Spirochaetes	Spirochaetia	Spirochaetales	Spirochaetaceae	Treponema	Treponema pallidum
GCA_001713175.1_ASM171317v1_genomic.fna	gtdb	Spirochaetes	Spirochaetia	Spirochaetales	Spirochaetaceae	Treponema	Treponema pallidum
GCA_001662505.1_ASM166250v1_genomic.fna	gtdb	Actinobacteria	Actinobacteria	Corynebacteriales	Nocardiaceae	Rhodococcus	Rhodococcus qingshengii
GCA_001681485.1_ASM168148v1_genomic.fna	gtdb	Proteobacteria	Alphaproteobacteria	Rhodobacterales	Rhodobacteraceae	Epibacterium	Epibacterium mobile
GCA_001681645.1_ASM168164v1_genomic.fna	gtdb	Proteobacteria	Alphaproteobacteria	Rhodobacterales	Rhodobacteraceae	Epibacterium	Epibacterium mobile
GCA_001649275.1_ASM164927v1_genomic.fna	gtdb	Proteobacteria	Gammaproteobacteria	Enterobacterales	Enterobacteriaceae	Shigella	Shigella flexneri
GCA_001653075.1_Psphaerica_assembly01_genomic.fna	gtdb	Actinobacteria	Actinobacteria	Streptosporangiales	Streptosporangiaceae	Planomonospora	Planomonospora sphaerica
GCA_001689095.1_ASM168909v1_genomic.fna	gtdb	Proteobacteria	Gammaproteobacteria	Enterobacterales	Enterobacteriaceae	Shigella	Shigella sonnei
GCA_001692195.1_ASM169219v1_genomic.fna	gtdb	Proteobacteria	Alphaproteobacteria	Rhizobiales	Rhizobiaceae	Agrobacterium	Agrobacterium tumefaciens
GCA_001685545.1_ASM168554v1_genomic.fna	gtdb	Proteobacteria	Gammaproteobacteria	Legionellales	Legionellaceae	Legionella	Legionella pneumophila
GCA_001713255.1_ASM171325v1_genomic.fna	gtdb	Spirochaetes	Spirochaetia	Spirochaetales	Spirochaetaceae	Treponema	Treponema pallidum
GCA_001720165.1_MmBur1_1.0_genomic.fna	gtdb	Proteobacteria	Gammaproteobacteria	Thiotrichales	Piscirickettsiaceae	Methylophaga	Methylophaga muralis
GCA_001682275.1_ASM168227v1_genomic.fna	gtdb	Actinobacteria	Actinobacteria	Corynebacteriales	Corynebacteriaceae	Corynebacterium	Corynebacterium pseudotuberculosis
GCA_001688545.1_ASM168854v1_genomic.fna	gtdb	Proteobacteria	Gammaproteobacteria	Enterobacterales	Enterobacteriaceae	Shigella	Shigella sonnei
GCA_001655355.1_ASM165535v1_genomic.fna	gtdb	Spirochaetes	Spirochaetia	Spirochaetales	Spirochaetaceae	Treponema	Treponema pallidum
GCA_001703835.1_ASM170383v1_genomic.fna	gtdb	Bacteroidetes	Flavobacteriia	Flavobacteriales	Flavobacteriaceae	Elizabethkingia	Elizabethkingia anophelis
GCA_001681285.1_ASM168128v1_genomic.fna	gtdb	Proteobacteria	Alphaproteobacteria	Rhodobacterales	Rhodobacteraceae	Epibacterium	Epibacterium mobile
GCA_001671545.1_ASM167154v1_genomic.fna	gtdb	Proteobacteria	Alphaproteobacteria	Rhizobiales	Phyllobacteriaceae	Mesorhizobium	Mesorhizobium loti
GCA_001702315.1_ASM170231v1_genomic.fna	gtdb	Proteobacteria	Alphaproteobacteria	Rhizobiales	Brucellaceae	Brucella	Brucella melitensis
GCA_001681205.1_ASM168120v1_genomic.fna	gtdb	Proteobacteria	Alphaproteobacteria	Rhodobacterales	Rhodobacteraceae	Epibacterium	Epibacterium mobile
GCA_001685965.1_ASM168596v1_genomic.fna	gtdb	Actinobacteria	Actinobacteria	Bifidobacteriales	Bifidobacteriaceae	Bifidobacterium	Bifidobacterium pseudocatenulatum
GCA_001689215.1_ASM168921v1_genomic.fna	gtdb	Proteobacteria	Gammaproteobacteria	Enterobacterales	Enterobacteriaceae	Shigella	Shigella sonnei
GCA_001688895.1_ASM168889v1_genomic.fna	gtdb	Proteobacteria	Gammaproteobacteria	Enterobacterales	Enterobacteriaceae	Shigella	Shigella sonnei
GCA_001702375.1_ASM170237v1_genomic.fna	gtdb	Proteobacteria	Alphaproteobacteria	Rhizobiales	Brucellaceae	Brucella	Brucella melitensis
GCA_001681605.1_ASM168160v1_genomic.fna	gtdb	Proteobacteria	Alphaproteobacteria	Rhodobacterales	Rhodobacteraceae	Epibacterium	Epibacterium mobile
GCA_001715785.1_ASM171578v1_genomic.fna	gtdb	Firmicutes	Bacilli	Bacillales	Listeriaceae	Brochothrix	Brochothrix thermosphacta
GCA_001718185.1_ASM171818v1_genomic.fna	gtdb	Proteobacteria	Alphaproteobacteria	Rhizobiales	Bradyrhizobiaceae	Bradyrhizobium	Bradyrhizobium elkanii
GCA_001686025.1_ASM168602v1_genomic.fna	gtdb	Actinobacteria	Actinobacteria	Bifidobacteriales	Bifidobacteriaceae	Bifidobacterium	Bifidobacterium pseudocatenulatum
GCA_001656095.1_ASM165609v1_genomic.fna	gtdb	Proteobacteria	Gammaproteobacteria	Pseudomonadales	Moraxellaceae	Moraxella	Moraxella catarrhalis
GCA_001655675.1_ASM165567v1_genomic.fna	gtdb	Proteobacteria	Gammaproteobacteria	Enterobacterales	Enterobacteriaceae	Mangrovibacter	Mangrovibacter phragmitis
GCA_001705915.1_ASM170591v1_genomic.fna	gtdb	Proteobacteria	Gammaproteobacteria	Aeromonadales	Aeromonadaceae	Aeromonas	Aeromonas hydrophila
GCA_001618955.1_ASM161895v1_genomic.fna	gtdb	Proteobacteria	Alphaproteobacteria	Rhizobiales	Bradyrhizobiaceae	Tardiphaga	Tardiphaga robiniae
GCA_001596665.1_ASM159666v1_genomic.fna	gtdb	Proteobacteria	Gammaproteobacteria	Pasteurellales	Pasteurellaceae	Mannheimia	Mannheimia haemolytica
GCA_001573515.1_ASM157351v1_genomic.fna	gtdb	Firmicutes	Clostridia	Clostridiales	Clostridiaceae	Clostridium	Clostridium botulinum
GCA_001618385.1_ASM161838v1_genomic.fna	gtdb	Bacteroidetes	Bacteroidia	Bacteroidales	Paludibacteraceae	Paludibacter	Paludibacter jiangxiensis
GCA_001583575.1_ASM158357v1_genomic.fna	gtdb	Proteobacteria	Gammaproteobacteria	Legionellales	Legionellaceae	Legionella	Legionella pneumophila
GCA_001574695.1_ASM157469v1_genomic.fna	gtdb	Proteobacteria	Gammaproteobacteria	Thiotrichales	Francisellaceae	Francisella	Francisella tularensis
GCA_001597895.1_ASM159789v1_genomic.fna	gtdb	Proteobacteria	Gammaproteobacteria	Aeromonadales	Aeromonadaceae	Aeromonas	Aeromonas salmonicida
GCA_001586255.1_ASM158625v1_genomic.fna	gtdb	Proteobacteria	Gammaproteobacteria	Cellvibrionales	Spongiibacteraceae	Zhongshania	Zhongshania aliphaticivorans
GCA_001582565.1_ASM158256v1_genomic.fna	gtdb	Proteobacteria	Gammaproteobacteria	Legionellales	Legionellaceae	Legionella	Legionella pneumophila
GCA_001573905.1_ASM157390v1_genomic.fna	gtdb	Firmicutes	Clostridia	Clostridiales	Clostridiaceae	Clostridium	Clostridium botulinum
GCA_001601505.1_ASM160150v1_genomic.fna	gtdb	Proteobacteria	Gammaproteobacteria	Legionellales	Legionellaceae	Legionella	Legionella pneumophila
GCA_001617735.1_Yersinia_pestis_M-1763_genomic.fna	gtdb	Proteobacteria	Gammaproteobacteria	Enterobacterales	Yersiniaceae	Yersinia	Yersinia pestis
GCA_001582485.1_ASM158248v1_genomic.fna	gtdb	Proteobacteria	Gammaproteobacteria	Legionellales	Legionellaceae	Legionella	Legionella pneumophila
GCA_001628715.1_ASM162871v1_genomic.fna	gtdb	Proteobacteria	Alphaproteobacteria	Rhodospirillales	Acetobacteraceae	Acetobacter	Acetobacter oryzifermentans
GCA_001582625.1_ASM158262v1_genomic.fna	gtdb	Proteobacteria	Gammaproteobacteria	Legionellales	Legionellaceae	Legionella	Legionella pneumophila
GCA_001570905.1_ASM157090v1_genomic.fna	gtdb	Actinobacteria	Actinobacteria	Micrococcales	Microbacteriaceae	Pseudoclavibacter	Pseudoclavibacter alba
GCA_001608445.1_FHIS001-SEQ-1-ASM-1_genomic.fna	gtdb	Proteobacteria	Gammaproteobacteria	Thiotrichales	Francisellaceae	Francisella	Francisella hispaniensis
GCA_001592945.1_ASM159294v1_genomic.fna	gtdb	Bacteroidetes	Cytophagia	Cytophagales	Flammeovirgaceae	Roseivirga	Roseivirga seohaensis
GCA_001611935.1_ASM161193v1_genomic.fna	gtdb	Tenericutes	Mollicutes	Mycoplasmatales	Mycoplasmataceae	Mycoplasma	Mycoplasma bovis
GCA_001574675.1_ASM157467v1_genomic.fna	gtdb	Proteobacteria	Gammaproteobacteria	Thiotrichales	Francisellaceae	Francisella	Francisella tularensis
GCA_001582235.1_ASM158223v1_genomic.fna	gtdb	Proteobacteria	Gammaproteobacteria	Legionellales	Legionellaceae	Legionella	Legionella pneumophila
GCA_001598235.1_ASM159823v1_genomic.fna	gtdb	Proteobacteria	Betaproteobacteria	Burkholderiales	Comamonadaceae	Polaromonas	Polaromonas jejuensis
GCA_001645365.1_WG2_genomic.fna	gtdb	Firmicutes	Bacilli	Lactobacillales	Streptococcaceae	Lactococcus	Lactococcus lactis
GCA_001583505.1_ASM158350v1_genomic.fna	gtdb	Proteobacteria	Gammaproteobacteria	Chromatiales	Chromatiaceae	Marichromatium	Marichromatium gracile
GCA_001594165.1_ASM159416v1_genomic.fna	gtdb	Proteobacteria	Alphaproteobacteria	Rhizobiales	Brucellaceae	Brucella	Brucella suis
GCA_001592045.1_ASM159204v1_genomic.fna	gtdb	Actinobacteria	Actinobacteria	Streptosporangiales	Nocardiopsaceae	Thermobifida	Thermobifida fusca
GCA_001580865.1_ASM158086v1_genomic.fna	gtdb	Proteobacteria	Alphaproteobacteria	Rhodospirillales	Acetobacteraceae	Gluconobacter	Gluconobacter japonicus
GCA_001598575.1_ASM159857v1_genomic.fna	gtdb	Proteobacteria	Alphaproteobacteria	Sphingomonadales	Sphingomonadaceae	Novosphingobium	Novosphingobium subterraneum
GCA_001582645.1_ASM158264v1_genomic.fna	gtdb	Proteobacteria	Gammaproteobacteria	Legionellales	Legionellaceae	Legionella	Legionella pneumophila
GCA_001580625.1_ASM158062v1_genomic.fna	gtdb	Proteobacteria	Alphaproteobacteria	Rhodospirillales	Acetobacteraceae	Gluconobacter	Gluconobacter oxydans
GCA_001577795.1_ASM157779v1_genomic.fna	gtdb	Firmicutes	Clostridia	Clostridiales	Peptostreptococcaceae	Clostridioides	Clostridioides difficile
GCA_001572945.1_ASM157294v1_genomic.fna	gtdb	Proteobacteria	Epsilonproteobacteria	Campylobacterales	Campylobacteraceae	Arcobacter	Arcobacter skirrowii
GCA_001591025.1_ASM159102v1_genomic.fna	gtdb	Proteobacteria	Alphaproteobacteria	Sphingomonadales	Sphingomonadaceae	Sphingomonas	Sphingomonas soli
GCA_001602115.1_ASM160211v1_genomic.fna	gtdb	Actinobacteria	Actinobacteria	Propionibacteriales	Propionibacteriaceae	Acidipropionibacterium	Acidipropionibacterium acidipropionici
GCA_001582635.1_ASM158263v1_genomic.fna	gtdb	Proteobacteria	Gammaproteobacteria	Legionellales	Legionellaceae	Legionella	Legionella pneumophila
GCA_001634445.1_ASM163444v1_genomic.fna	gtdb	Firmicutes	Bacilli	Lactobacillales	Lactobacillaceae	Pediococcus	Pediococcus acidilactici
GCA_001643285.1_ASM164328v1_genomic.fna	gtdb	Proteobacteria	Gammaproteobacteria	Aeromonadales	Aeromonadaceae	Aeromonas	Aeromonas salmonicida
GCA_001634345.1_ASM163434v1_genomic.fna	gtdb	Proteobacteria	Gammaproteobacteria	Aeromonadales	Aeromonadaceae	Aeromonas	Aeromonas veronii
GCA_001573725.1_ASM157372v1_genomic.fna	gtdb	Firmicutes	Clostridia	Clostridiales	Clostridiaceae	Clostridium	Clostridium botulinum
GCA_001571185.1_ASM157118v1_genomic.fna	gtdb	Proteobacteria	Betaproteobacteria	Burkholderiales	Oxalobacteraceae	Janthinobacterium	Janthinobacterium agaricidamnosum
GCA_001632285.1_ASM163228v1_genomic.fna	gtdb	Proteobacteria	Gammaproteobacteria	Pseudomonadales	Moraxellaceae	Moraxella	Moraxella catarrhalis
GCA_001583565.1_ASM158356v1_genomic.fna	gtdb	Proteobacteria	Gammaproteobacteria	Legionellales	Legionellaceae	Legionella	Legionella pneumophila
GCA_001622385.1_ASM162238v1_genomic.fna	gtdb	Firmicutes	Bacilli	Lactobacillales	Streptococcaceae	Lactococcus	Lactococcus lactis
GCA_001643035.1_ASM164303v1_genomic.fna	gtdb	Actinobacteria	Actinobacteria	Corynebacteriales	Corynebacteriaceae	Corynebacterium	Corynebacterium glutamicum
GCA_001601535.1_ASM160153v1_genomic.fna	gtdb	Proteobacteria	Gammaproteobacteria	Legionellales	Legionellaceae	Legionella	Legionella pneumophila
GCA_001645385.1_ASM164538v1_genomic.fna	gtdb	Actinobacteria	Actinobacteria	Corynebacteriales	Nocardiaceae	Rhodococcus	Rhodococcus kyotonensis
GCA_001645775.1_PAQ99-XT_genomic.fna	gtdb	Firmicutes	Bacilli	Lactobacillales	Streptococcaceae	Lactococcus	Lactococcus garvieae
GCA_001582555.1_ASM158255v1_genomic.fna	gtdb	Proteobacteria	Gammaproteobacteria	Legionellales	Legionellaceae	Legionella	Legionella pneumophila
GCA_001613125.1_ASM161312v1_genomic.fna	gtdb	Actinobacteria	Actinobacteria	Corynebacteriales	Nocardiaceae	Nocardia	Nocardia shimofusensis
GCA_001581075.1_ASM158107v1_genomic.fna	gtdb	Proteobacteria	Alphaproteobacteria	Rhodospirillales	Acetobacteraceae	Acetobacter	Acetobacter cerevisiae
GCA_001634455.1_ASM163445v1_genomic.fna	gtdb	Firmicutes	Bacilli	Lactobacillales	Lactobacillaceae	Pediococcus	Pediococcus acidilactici
GCA_001598795.1_ASM159879v1_genomic.fna	gtdb	Proteobacteria	Betaproteobacteria	Burkholderiales	Comamonadaceae	Delftia	Delftia acidovorans
GCA_001582015.1_ASM158201v1_genomic.fna	gtdb	Actinobacteria	Actinobacteria	Corynebacteriales	Mycobacteriaceae	Mycolicibacterium	Mycolicibacterium phlei
GCA_001582695.1_ASM158269v1_genomic.fna	gtdb	Proteobacteria	Gammaproteobacteria	Legionellales	Legionellaceae	Legionella	Legionella pneumophila
GCA_001591325.1_ASM159132v1_genomic.fna	gtdb	Proteobacteria	Gammaproteobacteria	Alteromonadales	Shewanellaceae	Shewanella	Shewanella putrefaciens
GCA_001597735.1_ASM159773v1_genomic.fna	gtdb	Proteobacteria	Gammaproteobacteria	Oceanospirillales	Oceanospirillaceae	Neptuniibacter	Neptuniibacter pectenicola
GCA_001573705.1_ASM157370v1_genomic.fna	gtdb	Firmicutes	Clostridia	Clostridiales	Clostridiaceae	Clostridium	Clostridium botulinum
GCA_001596225.1_SA2149v1.0_genomic.fna	gtdb	Proteobacteria	Gammaproteobacteria	Pasteurellales	Pasteurellaceae	Aggregatibacter	Aggregatibacter actinomycetemcomitans
GCA_001581045.1_ASM158104v1_genomic.fna	gtdb	Proteobacteria	Alphaproteobacteria	Rhodospirillales	Acetobacteraceae	Gluconobacter	Gluconobacter oxydans
GCA_001592205.1_ASM159220v1_genomic.fna	gtdb	Proteobacteria	Alphaproteobacteria	Caulobacterales	Caulobacteraceae	Brevundimonas	Brevundimonas vesicularis
GCA_001619585.1_ASM161958v1_genomic.fna	gtdb	Firmicutes	Bacilli	Bacillales	Planococcaceae	Bhargavaea	Bhargavaea cecembensis
GCA_001623435.1_ASM162343v1_genomic.fna	gtdb	Actinobacteria	Actinobacteria	Corynebacteriales	Nocardiaceae	Rhodococcus	Rhodococcus qingshengii
GCA_001612535.1_ASM161253v1_genomic.fna	gtdb	Proteobacteria	Alphaproteobacteria	Rhizobiales	Rhizobiaceae	Rhizobium	Rhizobium leguminosarum
GCA_001623895.1_ASM162389v1_genomic.fna	gtdb	Actinobacteria	Actinobacteria	Corynebacteriales	Tsukamurellaceae	Tsukamurella	Tsukamurella tyrosinosolvens
GCA_001646925.1_re13_genomic.fna	gtdb	Actinobacteria	Actinobacteria	Corynebacteriales	Nocardiaceae	Rhodococcus	Rhodococcus hoagii
GCA_001574335.1_ASM157433v1_genomic.fna	gtdb	Firmicutes	Clostridia	Clostridiales	Clostridiaceae	Clostridium	Clostridium botulinum
GCA_001582455.1_ASM158245v1_genomic.fna	gtdb	Proteobacteria	Gammaproteobacteria	Legionellales	Legionellaceae	Legionella	Legionella pneumophila
GCA_001573385.1_ASM157338v1_genomic.fna	gtdb	Firmicutes	Clostridia	Clostridiales	Clostridiaceae	Clostridium	Clostridium botulinum
GCA_001573335.1_ASM157333v1_genomic.fna	gtdb	Firmicutes	Clostridia	Clostridiales	Clostridiaceae	Clostridium	Clostridium botulinum
GCA_001597395.1_ASM159739v1_genomic.fna	gtdb	Fusobacteria	Fusobacteriia	Fusobacteriales	Fusobacteriaceae	Fusobacterium	Fusobacterium necrophorum
GCA_001602525.1_ASM160252v1_genomic.fna	gtdb	Bacteroidetes	Flavobacteriia	Flavobacteriales	Flavobacteriaceae	Flavobacterium	Flavobacterium chilense
GCA_001639725.1_ASM163972v1_genomic.fna	gtdb	Proteobacteria	Gammaproteobacteria	Oceanospirillales	Oceanospirillaceae	Marinomonas	Marinomonas atlantica
GCA_001571225.1_ASM157122v1_genomic.fna	gtdb	Proteobacteria	Betaproteobacteria	Burkholderiales	Comamonadaceae	Hydrogenophaga	Hydrogenophaga palleronii
GCA_001574555.1_ASM157455v1_genomic.fna	gtdb	Proteobacteria	Gammaproteobacteria	Thiotrichales	Francisellaceae	Francisella	Francisella tularensis
GCA_001582545.1_ASM158254v1_genomic.fna	gtdb	Proteobacteria	Gammaproteobacteria	Legionellales	Legionellaceae	Legionella	Legionella pneumophila
GCA_001622235.1_ASM162223v1_genomic.fna	gtdb	Firmicutes	Bacilli	Lactobacillales	Streptococcaceae	Lactococcus	Lactococcus lactis
GCA_001574785.1_ASM157478v1_genomic.fna	gtdb	Proteobacteria	Gammaproteobacteria	Thiotrichales	Francisellaceae	Francisella	Francisella tularensis
GCA_001574605.1_ASM157460v1_genomic.fna	gtdb	Proteobacteria	Gammaproteobacteria	Thiotrichales	Francisellaceae	Francisella	Francisella tularensis
GCA_001644045.1_ASM164404v1_genomic.fna	gtdb	Proteobacteria	Gammaproteobacteria	Methylococcales	Methylococcaceae	Methylomonas	Methylomonas methanica
GCA_001622315.1_ASM162231v1_genomic.fna	gtdb	Firmicutes	Bacilli	Lactobacillales	Streptococcaceae	Lactococcus	Lactococcus lactis
GCA_001597335.1_ASM159733v1_genomic.fna	gtdb	Fusobacteria	Fusobacteriia	Fusobacteriales	Fusobacteriaceae	Fusobacterium	Fusobacterium necrophorum
GCA_001617715.1_Yersinia_pestis_M-519_genomic.fna	gtdb	Proteobacteria	Gammaproteobacteria	Enterobacterales	Yersiniaceae	Yersinia	Yersinia pestis
GCA_001600895.1_ASM160089v1_genomic.fna	gtdb	Proteobacteria	Gammaproteobacteria	Legionellales	Legionellaceae	Legionella	Legionella pneumophila
GCA_001644095.1_ASM164409v1_genomic.fna	gtdb	Proteobacteria	Gammaproteobacteria	Methylococcales	Methylococcaceae	Methylomonas	Methylomonas koyamae
GCA_001571245.1_ASM157124v1_genomic.fna	gtdb	Proteobacteria	Betaproteobacteria	Burkholderiales	Alcaligenaceae	Achromobacter	Achromobacter piechaudii
GCA_001596485.1_ASM159648v1_genomic.fna	gtdb	Fusobacteria	Fusobacteriia	Fusobacteriales	Fusobacteriaceae	Fusobacterium	Fusobacterium necrophorum
GCA_001573805.1_ASM157380v1_genomic.fna	gtdb	Firmicutes	Clostridia	Clostridiales	Clostridiaceae	Clostridium	Clostridium botulinum
GCA_001574835.1_ASM157483v1_genomic.fna	gtdb	Proteobacteria	Gammaproteobacteria	Thiotrichales	Francisellaceae	Francisella	Francisella tularensis
GCA_001622215.1_ASM162221v1_genomic.fna	gtdb	Firmicutes	Bacilli	Lactobacillales	Streptococcaceae	Lactococcus	Lactococcus lactis
GCA_001574755.1_ASM157475v1_genomic.fna	gtdb	Proteobacteria	Gammaproteobacteria	Thiotrichales	Francisellaceae	Francisella	Francisella tularensis
GCA_001597575.1_ASM159757v1_genomic.fna	gtdb	Fusobacteria	Fusobacteriia	Fusobacteriales	Fusobacteriaceae	Fusobacterium	Fusobacterium necrophorum
GCA_001644795.1_ASM164479v1_genomic.fna	gtdb	Proteobacteria	Betaproteobacteria	Burkholderiales	Burkholderiaceae	Ralstonia	Ralstonia solanacearum
GCA_001582165.1_ASM158216v1_genomic.fna	gtdb	Proteobacteria	Gammaproteobacteria	Legionellales	Legionellaceae	Legionella	Legionella pneumophila
GCA_001582785.1_ASM158278v1_genomic.fna	gtdb	Proteobacteria	Gammaproteobacteria	Legionellales	Legionellaceae	Legionella	Legionella pneumophila
GCA_001580535.1_ASM158053v1_genomic.fna	gtdb	Proteobacteria	Alphaproteobacteria	Rhodospirillales	Acetobacteraceae	Acetobacter	Acetobacter cerevisiae
GCA_001570765.1_ASM157076v1_genomic.fna	gtdb	Actinobacteria	Actinobacteria	Streptosporangiales	Nocardiopsaceae	Nocardiopsis	Nocardiopsis listeri
GCA_001592185.1_ASM159218v1_genomic.fna	gtdb	Proteobacteria	Betaproteobacteria	Neisseriales	Neisseriaceae	Bergeriella	Bergeriella denitrificans
GCA_001593005.1_ASM159300v1_genomic.fna	gtdb	Bacteroidetes	Cytophagia	Cytophagales	Flammeovirgaceae	Roseivirga	Roseivirga ehrenbergii
GCA_001578565.1_ASM157856v1_genomic.fna	gtdb	Bacteroidetes	Bacteroidia	Bacteroidales	Bacteroidaceae	Bacteroides	Bacteroides thetaiotaomicron
GCA_001595975.1_ASM159597v1_genomic.fna	gtdb	Proteobacteria	Gammaproteobacteria	Xanthomonadales	Xanthomonadaceae	Stenotrophomonas	Stenotrophomonas maltophilia
GCA_001596415.1_SC383sv1.0_genomic.fna	gtdb	Proteobacteria	Gammaproteobacteria	Pasteurellales	Pasteurellaceae	Aggregatibacter	Aggregatibacter actinomycetemcomitans
GCA_001622305.1_ASM162230v1_genomic.fna	gtdb	Firmicutes	Bacilli	Lactobacillales	Streptococcaceae	Lactococcus	Lactococcus lactis
GCA_001598595.1_ASM159859v1_genomic.fna	gtdb	Proteobacteria	Betaproteobacteria	Burkholderiales	Alcaligenaceae	Achromobacter	Achromobacter xylosoxidans
GCA_001583585.1_ASM158358v1_genomic.fna	gtdb	Proteobacteria	Gammaproteobacteria	Legionellales	Legionellaceae	Legionella	Legionella pneumophila
GCA_001583645.1_ASM158364v1_genomic.fna	gtdb	Proteobacteria	Gammaproteobacteria	Legionellales	Legionellaceae	Legionella	Legionella pneumophila
GCA_001645605.1_ASM164560v1_genomic.fna	gtdb	Proteobacteria	Betaproteobacteria	Burkholderiales	Comamonadaceae	Variovorax	Variovorax paradoxus
GCA_001574885.1_ASM157488v1_genomic.fna	gtdb	Proteobacteria	Gammaproteobacteria	Thiotrichales	Francisellaceae	Francisella	Francisella tularensis
GCA_001592265.1_ASM159226v1_genomic.fna	gtdb	Proteobacteria	Betaproteobacteria	Burkholderiales	Comamonadaceae	Curvibacter	Curvibacter delicatus
GCA_001596565.1_ASM159656v1_genomic.fna	gtdb	Proteobacteria	Gammaproteobacteria	Pasteurellales	Pasteurellaceae	Mannheimia	Mannheimia haemolytica
GCA_001574705.1_ASM157470v1_genomic.fna	gtdb	Proteobacteria	Gammaproteobacteria	Thiotrichales	Francisellaceae	Francisella	Francisella tularensis
GCA_001595985.1_ASM159598v1_genomic.fna	gtdb	Proteobacteria	Betaproteobacteria	Burkholderiales	Burkholderiaceae	Polynucleobacter	Polynucleobacter sinensis
GCA_001637095.1_ASM163709v1_genomic.fna	gtdb	Proteobacteria	Betaproteobacteria	Burkholderiales	Alcaligenaceae	Achromobacter	Achromobacter ruhlandii
GCA_001573235.1_ASM157323v1_genomic.fna	gtdb	Firmicutes	Clostridia	Clostridiales	Clostridiaceae	Clostridium	Clostridium botulinum
GCA_001596305.1_SC29Rv1.0_genomic.fna	gtdb	Proteobacteria	Gammaproteobacteria	Pasteurellales	Pasteurellaceae	Aggregatibacter	Aggregatibacter actinomycetemcomitans
GCA_001593385.1_ASM159338v1_genomic.fna	gtdb	Bacteroidetes	Flavobacteriia	Flavobacteriales	Flavobacteriaceae	Chryseobacterium	Chryseobacterium cucumeris
GCA_001645815.1_ASM164581v1_genomic.fna	gtdb	Proteobacteria	Alphaproteobacteria	Rhodospirillales	Acetobacteraceae	Komagataeibacter	Komagataeibacter hansenii
GCA_001641425.1_ASM164142v1_genomic.fna	gtdb	Proteobacteria	Alphaproteobacteria	Rhizobiales	Rhizobiaceae	Agrobacterium	Agrobacterium tumefaciens
GCA_001591725.1_ASM159172v1_genomic.fna	gtdb	Firmicutes	Bacilli	Lactobacillales	Streptococcaceae	Lactococcus	Lactococcus lactis
GCA_001571205.1_ASM157120v1_genomic.fna	gtdb	Proteobacteria	Betaproteobacteria	Burkholderiales	Comamonadaceae	Hydrogenophaga	Hydrogenophaga intermedia
GCA_001573655.1_ASM157365v1_genomic.fna	gtdb	Firmicutes	Clostridia	Clostridiales	Clostridiaceae	Clostridium	Clostridium botulinum
GCA_001582145.1_ASM158214v1_genomic.fna	gtdb	Proteobacteria	Gammaproteobacteria	Legionellales	Legionellaceae	Legionella	Legionella pneumophila
GCA_001582325.1_ASM158232v1_genomic.fna	gtdb	Proteobacteria	Gammaproteobacteria	Legionellales	Legionellaceae	Legionella	Legionella pneumophila
GCA_001582705.1_ASM158270v1_genomic.fna	gtdb	Proteobacteria	Gammaproteobacteria	Legionellales	Legionellaceae	Legionella	Legionella pneumophila
GCA_001573435.1_ASM157343v1_genomic.fna	gtdb	Firmicutes	Clostridia	Clostridiales	Clostridiaceae	Clostridium	Clostridium botulinum
GCA_001613385.1_ASM161338v1_genomic.fna	gtdb	Actinobacteria	Actinobacteria	Corynebacteriales	Nocardiaceae	Nocardia	Nocardia flavorosea
GCA_001619695.1_ASM161969v1_genomic.fna	gtdb	Proteobacteria	Betaproteobacteria	Neisseriales	Neisseriaceae	Crenobacter	Crenobacter luteus
GCA_001646905.1_re12_genomic.fna	gtdb	Actinobacteria	Actinobacteria	Corynebacteriales	Nocardiaceae	Rhodococcus	Rhodococcus hoagii
GCA_001598055.1_ASM159805v1_genomic.fna	gtdb	Proteobacteria	Betaproteobacteria	Burkholderiales	Burkholderiaceae	Cupriavidus	Cupriavidus nantongensis
GCA_001582305.1_ASM158230v1_genomic.fna	gtdb	Proteobacteria	Gammaproteobacteria	Legionellales	Legionellaceae	Legionella	Legionella pneumophila
GCA_001582475.1_ASM158247v1_genomic.fna	gtdb	Proteobacteria	Gammaproteobacteria	Legionellales	Legionellaceae	Legionella	Legionella pneumophila
GCA_001574735.1_ASM157473v1_genomic.fna	gtdb	Proteobacteria	Gammaproteobacteria	Thiotrichales	Francisellaceae	Francisella	Francisella tularensis
GCA_001582795.1_ASM158279v1_genomic.fna	gtdb	Proteobacteria	Gammaproteobacteria	Legionellales	Legionellaceae	Legionella	Legionella pneumophila
GCA_001646885.1_re11_genomic.fna	gtdb	Actinobacteria	Actinobacteria	Corynebacteriales	Nocardiaceae	Rhodococcus	Rhodococcus hoagii
GCA_001639695.1_ASM163969v1_genomic.fna	gtdb	Proteobacteria	Gammaproteobacteria	Oceanospirillales	Oceanospirillaceae	Marinomonas	Marinomonas aquimarina
GCA_001641405.1_ASM164140v1_genomic.fna	gtdb	Bacteroidetes	Flavobacteriia	Flavobacteriales	Flavobacteriaceae	Tenacibaculum	Tenacibaculum ovolyticum
GCA_001582465.1_ASM158246v1_genomic.fna	gtdb	Proteobacteria	Gammaproteobacteria	Legionellales	Legionellaceae	Legionella	Legionella pneumophila
GCA_001622225.1_ASM162222v1_genomic.fna	gtdb	Firmicutes	Bacilli	Lactobacillales	Streptococcaceae	Lactococcus	Lactococcus lactis
GCA_001574485.1_ASM157448v1_genomic.fna	gtdb	Proteobacteria	Gammaproteobacteria	Thiotrichales	Francisellaceae	Francisella	Francisella tularensis
GCA_001574475.1_ASM157447v1_genomic.fna	gtdb	Proteobacteria	Gammaproteobacteria	Thiotrichales	Francisellaceae	Francisella	Francisella tularensis
GCA_001590965.1_ASM159096v1_genomic.fna	gtdb	Proteobacteria	Alphaproteobacteria	Sphingomonadales	Sphingomonadaceae	Novosphingobium	Novosphingobium lentum
GCA_001597485.1_ASM159748v1_genomic.fna	gtdb	Fusobacteria	Fusobacteriia	Fusobacteriales	Fusobacteriaceae	Fusobacterium	Fusobacterium necrophorum
GCA_001648935.1_ASM164893v1_genomic.fna	gtdb	Proteobacteria	Gammaproteobacteria	Enterobacterales	Enterobacteriaceae	Shigella	Shigella flexneri
GCA_001574855.1_ASM157485v1_genomic.fna	gtdb	Proteobacteria	Gammaproteobacteria	Thiotrichales	Francisellaceae	Francisella	Francisella tularensis
GCA_001637115.1_ASM163711v1_genomic.fna	gtdb	Proteobacteria	Betaproteobacteria	Burkholderiales	Alcaligenaceae	Achromobacter	Achromobacter ruhlandii
GCA_001644025.1_ASM164402v1_genomic.fna	gtdb	Proteobacteria	Gammaproteobacteria	Methylococcales	Methylococcaceae	Methylomonas	Methylomonas koyamae
GCA_001573465.1_ASM157346v1_genomic.fna	gtdb	Firmicutes	Clostridia	Clostridiales	Clostridiaceae	Clostridium	Clostridium botulinum
GCA_001582855.1_ASM158285v1_genomic.fna	gtdb	Proteobacteria	Gammaproteobacteria	Legionellales	Legionellaceae	Legionella	Legionella pneumophila
GCA_001589345.1_RCAD0122_genomic.fna	gtdb	Bacteroidetes	Flavobacteriia	Flavobacteriales	Flavobacteriaceae	Riemerella	Riemerella anatipestifer
GCA_001644135.1_ASM164413v1_genomic.fna	gtdb	Proteobacteria	Gammaproteobacteria	Methylococcales	Methylococcaceae	Methylomonas	Methylomonas koyamae
GCA_001592165.1_ASM159216v1_genomic.fna	gtdb	Proteobacteria	Betaproteobacteria	Burkholderiales	Comamonadaceae	Caldimonas	Caldimonas taiwanensis
GCA_001592825.1_ASM159282v1_genomic.fna	gtdb	Firmicutes	Bacilli	Bacillales	Planococcaceae	Planococcus	Planococcus maritimus
GCA_001581005.1_ASM158100v1_genomic.fna	gtdb	Proteobacteria	Alphaproteobacteria	Rhodospirillales	Acetobacteraceae	Acetobacter	Acetobacter orleanensis
GCA_001573245.1_ASM157324v1_genomic.fna	gtdb	Firmicutes	Clostridia	Clostridiales	Clostridiaceae	Clostridium	Clostridium botulinum
GCA_001640785.1_ASM164078v1_genomic.fna	gtdb	Firmicutes	Bacilli	Lactobacillales	Lactobacillaceae	Pediococcus	Pediococcus parvulus
GCA_001606005.1_ASM160600v1_genomic.fna	gtdb	Actinobacteria	Actinobacteria	Micrococcales	Brevibacteriaceae	Brevibacterium	Brevibacterium linens
GCA_001574775.1_ASM157477v1_genomic.fna	gtdb	Proteobacteria	Gammaproteobacteria	Thiotrichales	Francisellaceae	Francisella	Francisella tularensis
GCA_001646745.1_ASM164674v1_genomic.fna	gtdb	Actinobacteria	Actinobacteria	Corynebacteriales	Nocardiaceae	Rhodococcus	Rhodococcus qingshengii
GCA_001598495.1_ASM159849v1_genomic.fna	gtdb	Proteobacteria	Alphaproteobacteria	Rhodospirillales	Acetobacteraceae	Neokomagataea	Neokomagataea thailandica
GCA_001604895.1_ASM160489v1_genomic.fna	gtdb	Proteobacteria	Gammaproteobacteria	Aeromonadales	Aeromonadaceae	Aeromonas	Aeromonas hydrophila
GCA_001584605.1_ASM158460v1_genomic.fna	gtdb	Actinobacteria	Actinobacteria	Micrococcales	Microbacteriaceae	Microbacterium	Microbacterium laevaniformans
GCA_001641335.1_ASM164133v1_genomic.fna	gtdb	Proteobacteria	Alphaproteobacteria	Rhizobiales	Bradyrhizobiaceae	Bradyrhizobium	Bradyrhizobium stylosanthis
GCA_001574795.1_ASM157479v1_genomic.fna	gtdb	Proteobacteria	Gammaproteobacteria	Thiotrichales	Francisellaceae	Francisella	Francisella tularensis
GCA_001641495.1_ASM164149v1_genomic.fna	gtdb	Proteobacteria	Alphaproteobacteria	Rhizobiales	Brucellaceae	Ochrobactrum	Ochrobactrum intermedium
GCA_001573175.1_10148_genomic.fna	gtdb	Firmicutes	Clostridia	Clostridiales	Clostridiaceae	Clostridium	Clostridium botulinum
GCA_001581035.1_ASM158103v1_genomic.fna	gtdb	Proteobacteria	Alphaproteobacteria	Rhodospirillales	Acetobacteraceae	Acetobacter	Acetobacter malorum
GCA_001597525.1_ASM159752v1_genomic.fna	gtdb	Fusobacteria	Fusobacteriia	Fusobacteriales	Fusobacteriaceae	Fusobacterium	Fusobacterium necrophorum
GCA_001624335.1_ASM162433v1_genomic.fna	gtdb	Actinobacteria	Actinobacteria	Micrococcales	Cellulomonadaceae	Oerskovia	Oerskovia enterophila
GCA_001597625.1_ASM159762v1_genomic.fna	gtdb	Proteobacteria	Gammaproteobacteria	Enterobacterales	Erwiniaceae	Pantoea	Pantoea agglomerans
GCA_001594285.1_ASM159428v1_genomic.fna	gtdb	Bacteroidetes	Bacteroidia	Bacteroidales	Prevotellaceae	Prevotella	Prevotella intermedia
GCA_001574565.1_ASM157456v1_genomic.fna	gtdb	Proteobacteria	Gammaproteobacteria	Thiotrichales	Francisellaceae	Francisella	Francisella tularensis
GCA_001598815.1_ASM159881v1_genomic.fna	gtdb	Proteobacteria	Alphaproteobacteria	Sphingomonadales	Sphingomonadaceae	Sphingopyxis	Sphingopyxis terrae
GCA_001579275.1_ASM157927v1_genomic.fna	gtdb	Actinobacteria	Actinobacteria	Corynebacteriales	Corynebacteriaceae	Corynebacterium	Corynebacterium simulans
GCA_001582385.1_ASM158238v1_genomic.fna	gtdb	Proteobacteria	Gammaproteobacteria	Legionellales	Legionellaceae	Legionella	Legionella pneumophila
GCA_001596575.1_ASM159657v1_genomic.fna	gtdb	Proteobacteria	Gammaproteobacteria	Pasteurellales	Pasteurellaceae	Mannheimia	Mannheimia haemolytica
GCA_001592285.1_ASM159228v1_genomic.fna	gtdb	Proteobacteria	Betaproteobacteria	Burkholderiales	Comamonadaceae	Hydrogenophaga	Hydrogenophaga pseudoflava
GCA_001573935.1_ASM157393v1_genomic.fna	gtdb	Firmicutes	Clostridia	Clostridiales	Clostridiaceae	Clostridium	Clostridium botulinum
GCA_001582375.1_ASM158237v1_genomic.fna	gtdb	Proteobacteria	Gammaproteobacteria	Legionellales	Legionellaceae	Legionella	Legionella pneumophila
GCA_001643015.1_ASM164301v1_genomic.fna	gtdb	Actinobacteria	Actinobacteria	Corynebacteriales	Corynebacteriaceae	Corynebacterium	Corynebacterium crudilactis
GCA_001639685.1_ASM163968v1_genomic.fna	gtdb	Proteobacteria	Betaproteobacteria	Burkholderiales	Alcaligenaceae	Achromobacter	Achromobacter insolitus
GCA_001574935.1_ASM157493v1_genomic.fna	gtdb	Proteobacteria	Gammaproteobacteria	Thiotrichales	Francisellaceae	Francisella	Francisella tularensis
GCA_001572925.1_ASM157292v1_genomic.fna	gtdb	Proteobacteria	Epsilonproteobacteria	Campylobacterales	Campylobacteraceae	Arcobacter	Arcobacter skirrowii
GCA_001580175.1_ASM158017v1_genomic.fna	gtdb	Proteobacteria	Gammaproteobacteria	Enterobacterales	Enterobacteriaceae	Shigella	Shigella flexneri
GCA_001579765.1_ASM157976v1_genomic.fna	gtdb	Firmicutes	Clostridia	Clostridiales	Clostridiaceae	Clostridium	Clostridium perfringens
GCA_001579885.2_ASM157988v2_genomic.fna	gtdb	Actinobacteria	Actinobacteria	Corynebacteriales	Corynebacteriaceae	Corynebacterium	Corynebacterium pseudotuberculosis
GCA_001582295.1_ASM158229v1_genomic.fna	gtdb	Proteobacteria	Gammaproteobacteria	Legionellales	Legionellaceae	Legionella	Legionella pneumophila
GCA_001597305.1_ASM159730v1_genomic.fna	gtdb	Fusobacteria	Fusobacteriia	Fusobacteriales	Fusobacteriaceae	Fusobacterium	Fusobacterium necrophorum
GCA_001617805.1_Yersinia_pestis_173_genomic.fna	gtdb	Proteobacteria	Gammaproteobacteria	Enterobacterales	Yersiniaceae	Yersinia	Yersinia pestis
GCA_001582865.1_ASM158286v1_genomic.fna	gtdb	Proteobacteria	Gammaproteobacteria	Legionellales	Legionellaceae	Legionella	Legionella pneumophila
GCA_001637565.1_ASM163756v1_genomic.fna	gtdb	Actinobacteria	Actinobacteria	Micrococcales	Intrasporangiaceae	Janibacter	Janibacter melonis
GCA_001573255.1_ASM157325v1_genomic.fna	gtdb	Firmicutes	Clostridia	Clostridiales	Clostridiaceae	Clostridium	Clostridium botulinum
GCA_001595995.1_ASM159599v1_genomic.fna	gtdb	Proteobacteria	Alphaproteobacteria	Rhizobiales	Bradyrhizobiaceae	Bradyrhizobium	Bradyrhizobium liaoningense
GCA_001597725.1_ASM159772v1_genomic.fna	gtdb	Proteobacteria	Gammaproteobacteria	Oceanospirillales	Oceanospirillaceae	Neptuniibacter	Neptuniibacter marinus
GCA_001574365.1_ASM157436v1_genomic.fna	gtdb	Firmicutes	Clostridia	Clostridiales	Clostridiaceae	Clostridium	Clostridium botulinum
GCA_001592305.1_ASM159230v1_genomic.fna	gtdb	Proteobacteria	Betaproteobacteria	Burkholderiales	Comamonadaceae	Hydrogenophaga	Hydrogenophaga taeniospiralis
GCA_001619675.1_ASM161967v1_genomic.fna	gtdb	Proteobacteria	Gammaproteobacteria	Xanthomonadales	Xanthomonadaceae	Stenotrophomonas	Stenotrophomonas maltophilia
GCA_001582225.1_ASM158222v1_genomic.fna	gtdb	Proteobacteria	Gammaproteobacteria	Legionellales	Legionellaceae	Legionella	Legionella pneumophila
GCA_001641515.1_ASM164151v1_genomic.fna	gtdb	Proteobacteria	Betaproteobacteria	Burkholderiales	Alcaligenaceae	Achromobacter	Achromobacter insolitus
GCA_001582735.1_ASM158273v1_genomic.fna	gtdb	Proteobacteria	Gammaproteobacteria	Legionellales	Legionellaceae	Legionella	Legionella pneumophila
GCA_001578515.1_ASM157851v1_genomic.fna	gtdb	Proteobacteria	Gammaproteobacteria	Alteromonadales	Alteromonadaceae	Alteromonas	Alteromonas macleodii
GCA_001598195.1_ASM159819v1_genomic.fna	gtdb	Spirochaetes	Spirochaetia	Spirochaetales	Borreliaceae	Borrelia	Borrelia hermsii
GCA_001570805.1_ASM157080v1_genomic.fna	gtdb	Actinobacteria	Actinobacteria	Micrococcales	Brevibacteriaceae	Brevibacterium	Brevibacterium epidermidis
GCA_001596715.1_ASM159671v1_genomic.fna	gtdb	Proteobacteria	Gammaproteobacteria	Pasteurellales	Pasteurellaceae	Mannheimia	Mannheimia haemolytica
GCA_001644865.1_ASM164486v1_genomic.fna	gtdb	Proteobacteria	Betaproteobacteria	Burkholderiales	Burkholderiaceae	Ralstonia	Ralstonia solanacearum
GCA_001596425.1_SA3096v1.0_genomic.fna	gtdb	Proteobacteria	Gammaproteobacteria	Pasteurellales	Pasteurellaceae	Aggregatibacter	Aggregatibacter actinomycetemcomitans
GCA_001574635.1_ASM157463v1_genomic.fna	gtdb	Proteobacteria	Gammaproteobacteria	Thiotrichales	Francisellaceae	Francisella	Francisella tularensis
GCA_001611895.1_ASM161189v1_genomic.fna	gtdb	Tenericutes	Mollicutes	Mycoplasmatales	Mycoplasmataceae	Mycoplasma	Mycoplasma bovis
GCA_001580705.1_ASM158070v1_genomic.fna	gtdb	Proteobacteria	Alphaproteobacteria	Rhodospirillales	Acetobacteraceae	Gluconobacter	Gluconobacter oxydans
GCA_001596235.1_SC936v1.0_genomic.fna	gtdb	Proteobacteria	Gammaproteobacteria	Pasteurellales	Pasteurellaceae	Aggregatibacter	Aggregatibacter actinomycetemcomitans
GCA_001611905.1_ASM161190v1_genomic.fna	gtdb	Cyanobacteria	NA	Oscillatoriales	Microcoleaceae	Arthrospira	Arthrospira platensis
GCA_001573315.1_ASM157331v1_genomic.fna	gtdb	Firmicutes	Clostridia	Clostridiales	Clostridiaceae	Clostridium	Clostridium botulinum
GCA_001640115.1_ASM164011v1_genomic.fna	gtdb	Bacteroidetes	Flavobacteriia	Flavobacteriales	Flavobacteriaceae	Polaribacter	Polaribacter atrinae
GCA_001632485.1_ASM163248v1_genomic.fna	gtdb	Proteobacteria	Gammaproteobacteria	NA	NA	Wohlfahrtiimonas	Wohlfahrtiimonas chitiniclastica
GCA_001637105.1_ASM163710v1_genomic.fna	gtdb	Proteobacteria	Betaproteobacteria	Burkholderiales	Alcaligenaceae	Achromobacter	Achromobacter ruhlandii
GCA_001648045.1_ASM164804v1_genomic.fna	gtdb	Proteobacteria	Gammaproteobacteria	Thiotrichales	Francisellaceae	Francisella	Francisella noatunensis
GCA_001601455.1_ASM160145v1_genomic.fna	gtdb	Proteobacteria	Gammaproteobacteria	Legionellales	Legionellaceae	Legionella	Legionella pneumophila
GCA_001574355.1_ASM157435v1_genomic.fna	gtdb	Firmicutes	Clostridia	Clostridiales	Clostridiaceae	Clostridium	Clostridium botulinum
GCA_001580695.1_ASM158069v1_genomic.fna	gtdb	Proteobacteria	Alphaproteobacteria	Rhodospirillales	Acetobacteraceae	Acetobacter	Acetobacter malorum
GCA_001579925.1_ASM157992v1_genomic.fna	gtdb	Actinobacteria	Actinobacteria	Corynebacteriales	Corynebacteriaceae	Corynebacterium	Corynebacterium pseudotuberculosis
GCA_001646605.1_ASM164660v1_genomic.fna	gtdb	Firmicutes	Clostridia	Clostridiales	Clostridiaceae	Clostridium	Clostridium butyricum
GCA_001592125.1_ASM159212v1_genomic.fna	gtdb	Actinobacteria	Actinobacteria	Micrococcales	Microbacteriaceae	Microbacterium	Microbacterium hominis
GCA_001573825.1_ASM157382v1_genomic.fna	gtdb	Firmicutes	Clostridia	Clostridiales	Clostridiaceae	Clostridium	Clostridium botulinum
GCA_001592965.1_ASM159296v1_genomic.fna	gtdb	Bacteroidetes	Cytophagia	Cytophagales	Flammeovirgaceae	Roseivirga	Roseivirga spongicola
GCA_001574055.1_ASM157405v1_genomic.fna	gtdb	Firmicutes	Clostridia	Clostridiales	Clostridiaceae	Clostridium	Clostridium botulinum
GCA_001582315.1_ASM158231v1_genomic.fna	gtdb	Proteobacteria	Gammaproteobacteria	Legionellales	Legionellaceae	Legionella	Legionella pneumophila
GCA_001573775.1_ASM157377v1_genomic.fna	gtdb	Firmicutes	Clostridia	Clostridiales	Clostridiaceae	Clostridium	Clostridium botulinum
GCA_001591365.1_ASM159136v1_genomic.fna	gtdb	Proteobacteria	Betaproteobacteria	Burkholderiales	Comamonadaceae	Variovorax	Variovorax paradoxus
GCA_001582215.1_ASM158221v1_genomic.fna	gtdb	Proteobacteria	Gammaproteobacteria	Legionellales	Legionellaceae	Legionella	Legionella pneumophila
GCA_001622295.1_ASM162229v1_genomic.fna	gtdb	Firmicutes	Bacilli	Lactobacillales	Streptococcaceae	Lactococcus	Lactococcus lactis
GCA_001646805.1_ASM164680v1_genomic.fna	gtdb	Actinobacteria	Actinobacteria	Corynebacteriales	Nocardiaceae	Rhodococcus	Rhodococcus pyridinivorans
GCA_001571345.1_ASM157134v1_genomic.fna	gtdb	Proteobacteria	Alphaproteobacteria	Rhodospirillales	Acetobacteraceae	Komagataeibacter	Komagataeibacter xylinus
GCA_001580635.1_ASM158063v1_genomic.fna	gtdb	Proteobacteria	Alphaproteobacteria	Rhodospirillales	Acetobacteraceae	Gluconobacter	Gluconobacter oxydans
GCA_001570665.1_ASM157066v1_genomic.fna	gtdb	Firmicutes	Bacilli	Lactobacillales	Leuconostocaceae	Leuconostoc	Leuconostoc mesenteroides
GCA_001644645.1_ASM164464v1_genomic.fna	gtdb	Bacteroidetes	Chitinophagia	Chitinophagales	Chitinophagaceae	Flavisolibacter	Flavisolibacter tropicus
GCA_001601235.1_ASM160123v1_genomic.fna	gtdb	Proteobacteria	Gammaproteobacteria	Legionellales	Legionellaceae	Legionella	Legionella pneumophila
GCA_001572765.1_ASM157276v1_genomic.fna	gtdb	Proteobacteria	Gammaproteobacteria	Legionellales	Coxiellaceae	Coxiella	Coxiella burnetii
GCA_001625575.1_S2607_1.0_genomic.fna	gtdb	Proteobacteria	Gammaproteobacteria	Alteromonadales	Pseudoalteromonadaceae	Pseudoalteromonas	Pseudoalteromonas luteoviolacea
GCA_001573005.1_ASM157300v1_genomic.fna	gtdb	Proteobacteria	Epsilonproteobacteria	Campylobacterales	Campylobacteraceae	Arcobacter	Arcobacter cryaerophilus
GCA_001572875.1_ASM157287v1_genomic.fna	gtdb	Proteobacteria	Epsilonproteobacteria	Campylobacterales	Campylobacteraceae	Arcobacter	Arcobacter cryaerophilus
GCA_001583415.1_ASM158341v1_genomic.fna	gtdb	Actinobacteria	Actinobacteria	Corynebacteriales	Mycobacteriaceae	Mycolicibacterium	Mycolicibacterium phlei
GCA_001573295.1_ASM157329v1_genomic.fna	gtdb	Firmicutes	Clostridia	Clostridiales	Clostridiaceae	Clostridium	Clostridium botulinum
GCA_001596635.1_ASM159663v1_genomic.fna	gtdb	Proteobacteria	Gammaproteobacteria	Pasteurellales	Pasteurellaceae	Mannheimia	Mannheimia haemolytica
GCA_001596655.1_ASM159665v1_genomic.fna	gtdb	Proteobacteria	Gammaproteobacteria	Pasteurellales	Pasteurellaceae	Mannheimia	Mannheimia haemolytica
GCA_001643355.1_ASM164335v1_genomic.fna	gtdb	Proteobacteria	Gammaproteobacteria	Aeromonadales	Aeromonadaceae	Aeromonas	Aeromonas salmonicida
GCA_001641385.1_ASM164138v1_genomic.fna	gtdb	Firmicutes	Bacilli	Lactobacillales	Lactobacillaceae	Pediococcus	Pediococcus inopinatus
GCA_001582535.1_ASM158253v1_genomic.fna	gtdb	Proteobacteria	Gammaproteobacteria	Legionellales	Legionellaceae	Legionella	Legionella pneumophila
GCA_001596385.1_SA3033v1.0_genomic.fna	gtdb	Proteobacteria	Gammaproteobacteria	Pasteurellales	Pasteurellaceae	Aggregatibacter	Aggregatibacter actinomycetemcomitans
GCA_001580915.1_ASM158091v1_genomic.fna	gtdb	Proteobacteria	Alphaproteobacteria	Rhodospirillales	Acetobacteraceae	Acetobacter	Acetobacter tropicalis
GCA_001642325.1_ASM164232v1_genomic.fna	gtdb	Thermodesulfobacteria	Thermodesulfobacteria	Thermodesulfobacteriales	Thermodesulfobacteriaceae	Thermodesulfatator	Thermodesulfatator autotrophicus
GCA_001573395.1_ASM157339v1_genomic.fna	gtdb	Firmicutes	Clostridia	Clostridiales	Clostridiaceae	Clostridium	Clostridium botulinum
GCA_001574905.1_ASM157490v1_genomic.fna	gtdb	Proteobacteria	Gammaproteobacteria	Thiotrichales	Francisellaceae	Francisella	Francisella tularensis
GCA_001596555.1_ASM159655v1_genomic.fna	gtdb	Proteobacteria	Gammaproteobacteria	Pasteurellales	Pasteurellaceae	Mannheimia	Mannheimia haemolytica
GCA_001611865.1_ASM161186v1_genomic.fna	gtdb	Tenericutes	Mollicutes	Mycoplasmatales	Mycoplasmataceae	Mycoplasma	Mycoplasma bovis
GCA_001573695.1_ASM157369v1_genomic.fna	gtdb	Firmicutes	Clostridia	Clostridiales	Clostridiaceae	Clostridium	Clostridium botulinum
GCA_001608495.1_ERUM001-SEQ-1-ASM-1_genomic.fna	gtdb	Proteobacteria	Alphaproteobacteria	Rickettsiales	Anaplasmataceae	Ehrlichia	Ehrlichia ruminantium
GCA_001601355.1_ASM160135v1_genomic.fna	gtdb	Proteobacteria	Gammaproteobacteria	Legionellales	Legionellaceae	Legionella	Legionella pneumophila
GCA_001613245.1_ASM161324v1_genomic.fna	gtdb	Actinobacteria	Actinobacteria	Corynebacteriales	Nocardiaceae	Nocardia	Nocardia speluncae
GCA_001641615.1_ASM164161v1_genomic.fna	gtdb	Proteobacteria	Gammaproteobacteria	Alteromonadales	Pseudoalteromonadaceae	Pseudoalteromonas	Pseudoalteromonas gelatinilytica
GCA_001582245.1_ASM158224v1_genomic.fna	gtdb	Proteobacteria	Gammaproteobacteria	Legionellales	Legionellaceae	Legionella	Legionella pneumophila
GCA_001645725.1_ASM164572v1_genomic.fna	gtdb	Proteobacteria	Betaproteobacteria	Burkholderiales	Burkholderiaceae	Ralstonia	Ralstonia solanacearum
GCA_001641085.1_ASM164108v1_genomic.fna	gtdb	Bacteroidetes	Flavobacteriia	Flavobacteriales	Flavobacteriaceae	Aequorivita	Aequorivita soesokkakensis
GCA_001575155.1_ASM157515v1_genomic.fna	gtdb	Actinobacteria	Actinobacteria	Corynebacteriales	Tsukamurellaceae	Tsukamurella	Tsukamurella tyrosinosolvens
GCA_001582615.1_ASM158261v1_genomic.fna	gtdb	Proteobacteria	Gammaproteobacteria	Legionellales	Legionellaceae	Legionella	Legionella pneumophila
GCA_001583595.1_ASM158359v1_genomic.fna	gtdb	Proteobacteria	Gammaproteobacteria	Legionellales	Legionellaceae	Legionella	Legionella pneumophila
GCA_001572935.1_ASM157293v1_genomic.fna	gtdb	Proteobacteria	Epsilonproteobacteria	Campylobacterales	Campylobacteraceae	Arcobacter	Arcobacter skirrowii
GCA_001640105.1_ASM164010v1_genomic.fna	gtdb	Proteobacteria	Betaproteobacteria	Burkholderiales	Comamonadaceae	Hydrogenophaga	Hydrogenophaga crassostreae
GCA_001574945.1_ASM157494v1_genomic.fna	gtdb	Proteobacteria	Gammaproteobacteria	Thiotrichales	Francisellaceae	Francisella	Francisella tularensis
GCA_001643055.1_ASM164305v1_genomic.fna	gtdb	Actinobacteria	Actinobacteria	Micrococcales	Microbacteriaceae	Clavibacter	Clavibacter michiganensis
GCA_001637085.1_ASM163708v1_genomic.fna	gtdb	Proteobacteria	Betaproteobacteria	Burkholderiales	Alcaligenaceae	Achromobacter	Achromobacter ruhlandii
GCA_001580765.1_ASM158076v1_genomic.fna	gtdb	Proteobacteria	Alphaproteobacteria	Rhodospirillales	Acetobacteraceae	Gluconobacter	Gluconobacter japonicus
GCA_001573455.1_ASM157345v1_genomic.fna	gtdb	Firmicutes	Clostridia	Clostridiales	Clostridiaceae	Clostridium	Clostridium botulinum
GCA_001573535.1_ASM157353v1_genomic.fna	gtdb	Firmicutes	Clostridia	Clostridiales	Clostridiaceae	Clostridium	Clostridium botulinum
GCA_001630765.1_scaffolds_genomic.fna	gtdb	Actinobacteria	Actinobacteria	Corynebacteriales	Dietziaceae	Dietzia	Dietzia maris
GCA_001574585.1_ASM157458v1_genomic.fna	gtdb	Proteobacteria	Gammaproteobacteria	Thiotrichales	Francisellaceae	Francisella	Francisella tularensis
GCA_001596245.1_SA2876v1.0_genomic.fna	gtdb	Proteobacteria	Gammaproteobacteria	Pasteurellales	Pasteurellaceae	Aggregatibacter	Aggregatibacter actinomycetemcomitans
GCA_001596585.1_ASM159658v1_genomic.fna	gtdb	Proteobacteria	Gammaproteobacteria	Pasteurellales	Pasteurellaceae	Mannheimia	Mannheimia haemolytica
GCA_001583655.1_ASM158365v1_genomic.fna	gtdb	Proteobacteria	Gammaproteobacteria	Legionellales	Legionellaceae	Legionella	Legionella pneumophila
GCA_001580785.1_ASM158078v1_genomic.fna	gtdb	Proteobacteria	Alphaproteobacteria	Rhodospirillales	Acetobacteraceae	Gluconobacter	Gluconobacter japonicus
GCA_001597325.1_ASM159732v1_genomic.fna	gtdb	Fusobacteria	Fusobacteriia	Fusobacteriales	Fusobacteriaceae	Fusobacterium	Fusobacterium necrophorum
GCA_001572105.1_ASM157210v1_genomic.fna	gtdb	Proteobacteria	Gammaproteobacteria	Xanthomonadales	Xanthomonadaceae	Xylella	Xylella fastidiosa
GCA_001582775.1_ASM158277v1_genomic.fna	gtdb	Proteobacteria	Gammaproteobacteria	Legionellales	Legionellaceae	Legionella	Legionella pneumophila
GCA_001642655.1_ASM164265v1_genomic.fna	gtdb	Firmicutes	Clostridia	Clostridiales	Clostridiaceae	Clostridium	Clostridium tyrobutyricum
GCA_001625595.1_NCIMB1942_1.0_genomic.fna	gtdb	Proteobacteria	Gammaproteobacteria	Alteromonadales	Pseudoalteromonadaceae	Pseudoalteromonas	Pseudoalteromonas luteoviolacea
GCA_001573795.1_ASM157379v1_genomic.fna	gtdb	Firmicutes	Clostridia	Clostridiales	Clostridiaceae	Clostridium	Clostridium botulinum
GCA_001573985.1_ASM157398v1_genomic.fna	gtdb	Firmicutes	Clostridia	Clostridiales	Clostridiaceae	Clostridium	Clostridium botulinum
GCA_001639045.1_ASM163904v1_genomic.fna	gtdb	Proteobacteria	Gammaproteobacteria	Legionellales	Legionellaceae	Legionella	Legionella pneumophila
GCA_001573635.1_ASM157363v1_genomic.fna	gtdb	Firmicutes	Clostridia	Clostridiales	Clostridiaceae	Clostridium	Clostridium botulinum
GCA_001580945.1_ASM158094v1_genomic.fna	gtdb	Proteobacteria	Alphaproteobacteria	Rhodospirillales	Acetobacteraceae	Acetobacter	Acetobacter tropicalis
GCA_001591345.1_ASM159134v1_genomic.fna	gtdb	Proteobacteria	Betaproteobacteria	Burkholderiales	Comamonadaceae	Variovorax	Variovorax boronicumulans
GCA_001574865.1_ASM157486v1_genomic.fna	gtdb	Proteobacteria	Gammaproteobacteria	Thiotrichales	Francisellaceae	Francisella	Francisella tularensis
GCA_001601325.1_ASM160132v1_genomic.fna	gtdb	Proteobacteria	Gammaproteobacteria	Legionellales	Legionellaceae	Legionella	Legionella pneumophila
GCA_001575225.1_ASM157522v1_genomic.fna	gtdb	Actinobacteria	Actinobacteria	Corynebacteriales	Tsukamurellaceae	Tsukamurella	Tsukamurella tyrosinosolvens
GCA_001612925.1_ASM161292v1_genomic.fna	gtdb	Actinobacteria	Actinobacteria	Corynebacteriales	Nocardiaceae	Nocardia	Nocardia farcinica
GCA_001573755.1_ASM157375v1_genomic.fna	gtdb	Firmicutes	Clostridia	Clostridiales	Clostridiaceae	Clostridium	Clostridium botulinum
GCA_001622375.1_ASM162237v1_genomic.fna	gtdb	Firmicutes	Bacilli	Lactobacillales	Streptococcaceae	Lactococcus	Lactococcus lactis
GCA_001596675.1_ASM159667v1_genomic.fna	gtdb	Proteobacteria	Gammaproteobacteria	Pasteurellales	Pasteurellaceae	Mannheimia	Mannheimia haemolytica
GCA_001648615.1_ASM164861v1_genomic.fna	gtdb	Proteobacteria	Gammaproteobacteria	Legionellales	Legionellaceae	Legionella	Legionella feeleii
GCA_001647635.1_ASM164763v1_genomic.fna	gtdb	Actinobacteria	Actinobacteria	Micrococcales	Microbacteriaceae	Leifsonia	Leifsonia xyli
GCA_001648595.1_ASM164859v1_genomic.fna	gtdb	Proteobacteria	Gammaproteobacteria	Legionellales	Legionellaceae	Fluoribacter	Fluoribacter bozemanae
GCA_001619955.1_ASM161995v1_genomic.fna	gtdb	Proteobacteria	Alphaproteobacteria	Sphingomonadales	Sphingomonadaceae	Sphingomonas	Sphingomonas hankookensis
GCA_001582135.1_ASM158213v1_genomic.fna	gtdb	Proteobacteria	Gammaproteobacteria	Legionellales	Legionellaceae	Legionella	Legionella pneumophila
GCA_001625565.1_NCIMB1944_1.0_genomic.fna	gtdb	Proteobacteria	Gammaproteobacteria	Alteromonadales	Pseudoalteromonadaceae	Pseudoalteromonas	Pseudoalteromonas luteoviolacea
GCA_001574655.1_ASM157465v1_genomic.fna	gtdb	Proteobacteria	Gammaproteobacteria	Thiotrichales	Francisellaceae	Francisella	Francisella tularensis
GCA_001578635.1_ASM157863v1_genomic.fna	gtdb	Bacteroidetes	Bacteroidia	Bacteroidales	Bacteroidaceae	Bacteroides	Bacteroides intestinalis
GCA_001598255.1_ASM159825v1_genomic.fna	gtdb	Proteobacteria	Betaproteobacteria	Burkholderiales	NA	Mitsuaria	Mitsuaria chitosanitabida
GCA_001574495.1_ASM157449v1_genomic.fna	gtdb	Proteobacteria	Gammaproteobacteria	Thiotrichales	Francisellaceae	Francisella	Francisella tularensis
GCA_001595965.1_ASM159596v1_genomic.fna	gtdb	Proteobacteria	Betaproteobacteria	Burkholderiales	Burkholderiaceae	Polynucleobacter	Polynucleobacter yangtzensis
GCA_001573485.1_ASM157348v1_genomic.fna	gtdb	Firmicutes	Clostridia	Clostridiales	Clostridiaceae	Clostridium	Clostridium botulinum
GCA_001574175.1_ASM157417v1_genomic.fna	gtdb	Firmicutes	Clostridia	Clostridiales	Clostridiaceae	Clostridium	Clostridium botulinum
GCA_001596795.1_ASM159679v1_genomic.fna	gtdb	Proteobacteria	Gammaproteobacteria	Alteromonadales	Pseudoalteromonadaceae	Pseudoalteromonas	Pseudoalteromonas telluritireducens
GCA_001586755.1_ASM158675v1_genomic.fna	gtdb	Cyanobacteria	NA	Nostocales	Aphanizomenonaceae	Cylindrospermopsis	Cylindrospermopsis raciborskii
GCA_001613935.1_ASM161393v1_genomic.fna	gtdb	Actinobacteria	Actinobacteria	Pseudonocardiales	Pseudonocardiaceae	Amycolatopsis	Amycolatopsis regifaucium
GCA_001617705.1_Yersinia_pestis_C-791_genomic.fna	gtdb	Proteobacteria	Gammaproteobacteria	Enterobacterales	Yersiniaceae	Yersinia	Yersinia pestis
GCA_001573375.1_ASM157337v1_genomic.fna	gtdb	Firmicutes	Clostridia	Clostridiales	Clostridiaceae	Clostridium	Clostridium botulinum
GCA_001647435.1_ASM164743v1_genomic.fna	gtdb	Proteobacteria	Gammaproteobacteria	Aeromonadales	Aeromonadaceae	Aeromonas	Aeromonas veronii
GCA_001597385.1_ASM159738v1_genomic.fna	gtdb	Fusobacteria	Fusobacteriia	Fusobacteriales	Fusobacteriaceae	Fusobacterium	Fusobacterium necrophorum
GCA_001582155.1_ASM158215v1_genomic.fna	gtdb	Proteobacteria	Gammaproteobacteria	Legionellales	Legionellaceae	Legionella	Legionella pneumophila
GCA_001598895.1_ASM159889v1_genomic.fna	gtdb	Proteobacteria	Gammaproteobacteria	Enterobacterales	Morganellaceae	Morganella	Morganella morganii
GCA_001591705.1_ASM159170v1_genomic.fna	gtdb	Firmicutes	Bacilli	Lactobacillales	Streptococcaceae	Lactococcus	Lactococcus lactis
GCA_001596735.1_ASM159673v1_genomic.fna	gtdb	Proteobacteria	Gammaproteobacteria	Pasteurellales	Pasteurellaceae	Mannheimia	Mannheimia haemolytica
GCA_001572865.1_ASM157286v1_genomic.fna	gtdb	Proteobacteria	Epsilonproteobacteria	Campylobacterales	Campylobacteraceae	Arcobacter	Arcobacter cryaerophilus
GCA_001573585.1_ASM157358v1_genomic.fna	gtdb	Firmicutes	Clostridia	Clostridiales	Clostridiaceae	Clostridium	Clostridium botulinum
GCA_001582405.1_ASM158240v1_genomic.fna	gtdb	Proteobacteria	Gammaproteobacteria	Legionellales	Legionellaceae	Legionella	Legionella pneumophila
GCA_001578435.2_ASM157843v2_genomic.fna	gtdb	Proteobacteria	Gammaproteobacteria	Pasteurellales	Pasteurellaceae	Pasteurella	Pasteurella multocida
GCA_001594385.1_ASM159438v1_genomic.fna	gtdb	Proteobacteria	Gammaproteobacteria	Enterobacterales	Yersiniaceae	Serratia	Serratia marcescens
GCA_001573015.1_ASM157301v1_genomic.fna	gtdb	Proteobacteria	Epsilonproteobacteria	Campylobacterales	Campylobacteraceae	Arcobacter	Arcobacter cryaerophilus
GCA_003311635.1_ASM331163v1_genomic.fna	gtdb	Proteobacteria	Alphaproteobacteria	Rhodospirillales	Acetobacteraceae	Komagataeibacter	Komagataeibacter cocois
GCA_003265585.1_ASM326558v1_genomic.fna	gtdb	Proteobacteria	Gammaproteobacteria	Aeromonadales	Aeromonadaceae	Aeromonas	Aeromonas veronii
GCA_003236175.1_ASM323617v1_genomic.fna	gtdb	Bacteroidetes	Chitinophagia	Chitinophagales	Chitinophagaceae	Taibaiella	Taibaiella soli
GCA_003265465.1_ASM326546v1_genomic.fna	gtdb	Proteobacteria	Gammaproteobacteria	Aeromonadales	Aeromonadaceae	Aeromonas	Aeromonas bivalvium
GCA_003350005.1_ASM335000v1_genomic.fna	gtdb	Proteobacteria	Gammaproteobacteria	Pseudomonadales	Moraxellaceae	Psychrobacter	Psychrobacter proteolyticus
GCA_003253005.1_ASM325300v1_genomic.fna	gtdb	Proteobacteria	Gammaproteobacteria	Pasteurellales	Pasteurellaceae	Haemophilus	Haemophilus parainfluenzae
GCA_003315555.1_ASM331555v1_genomic.fna	gtdb	Proteobacteria	Gammaproteobacteria	Alteromonadales	Alteromonadaceae	Marinobacter	Marinobacter hydrocarbonoclasticus
GCA_003253705.1_ASM325370v1_genomic.fna	gtdb	Proteobacteria	Alphaproteobacteria	Rhodospirillales	Acetobacteraceae	Humitalea	Humitalea rosea
GCA_003326715.1_ASM332671v1_genomic.fna	gtdb	Proteobacteria	Alphaproteobacteria	Rhodospirillales	Rhodospirillaceae	Thalassospira	Thalassospira xiamenensis
GCA_003253485.1_ASM325348v1_genomic.fna	gtdb	Bacteroidetes	Cytophagia	Cytophagales	Cyclobacteriaceae	Algoriphagus	Algoriphagus aquaeductus
GCA_003244315.1_ASM324431v1_genomic.fna	gtdb	Actinobacteria	Actinobacteria	Micrococcales	Promicromonosporaceae	Isoptericola	Isoptericola variabilis
GCA_003314995.1_ASM331499v1_genomic.fna	gtdb	Proteobacteria	Alphaproteobacteria	Rhizobiales	Brucellaceae	Pseudochrobactrum	Pseudochrobactrum asaccharolyticum
GCA_003337305.1_ASM333730v1_genomic.fna	gtdb	Bacteroidetes	Flavobacteriia	Flavobacteriales	Flavobacteriaceae	Winogradskyella	Winogradskyella arenosi
GCA_003367475.1_ASM336747v1_genomic.fna	gtdb	Proteobacteria	Gammaproteobacteria	Alteromonadales	Alteromonadaceae	Alteromonas	Alteromonas aestuariivivens
GCA_003287405.1_ASM328740v1_genomic.fna	gtdb	Firmicutes	Clostridia	Clostridiales	Ruminococcaceae	Faecalibacterium	Faecalibacterium prausnitzii
GCA_003350285.1_ASM335028v1_genomic.fna	gtdb	Proteobacteria	Alphaproteobacteria	Rhizobiales	Rhizobiaceae	Agrobacterium	Agrobacterium tumefaciens
GCA_003340255.1_ASM334025v1_genomic.fna	gtdb	Actinobacteria	Coriobacteriia	Eggerthellales	Eggerthellaceae	Eggerthella	Eggerthella lenta
GCA_003259955.1_ASM325995v1_genomic.fna	gtdb	Proteobacteria	Alphaproteobacteria	Rhizobiales	Brucellaceae	Falsochrobactrum	Falsochrobactrum ovis
GCA_003343285.1_ASM334328v1_genomic.fna	gtdb	Actinobacteria	Actinobacteria	Micrococcales	Micrococcaceae	Renibacterium	Renibacterium salmoninarum
GCA_003286895.1_ASM328689v1_genomic.fna	gtdb	Firmicutes	Bacilli	Lactobacillales	Aerococcaceae	Aerococcus	Aerococcus urinae
GCA_003339975.1_ASM333997v1_genomic.fna	gtdb	Actinobacteria	Coriobacteriia	Eggerthellales	Eggerthellaceae	Eggerthella	Eggerthella lenta
GCA_003286525.1_ASM328652v1_genomic.fna	gtdb	Firmicutes	Bacilli	Lactobacillales	Aerococcaceae	Aerococcus	Aerococcus urinae
GCA_003340145.1_ASM334014v1_genomic.fna	gtdb	Actinobacteria	Coriobacteriia	Eggerthellales	Eggerthellaceae	Eggerthella	Eggerthella lenta
GCA_003286845.1_ASM328684v1_genomic.fna	gtdb	Firmicutes	Bacilli	Lactobacillales	Aerococcaceae	Aerococcus	Aerococcus urinae
GCA_003315425.1_ASM331542v1_genomic.fna	gtdb	Proteobacteria	Gammaproteobacteria	Alteromonadales	Shewanellaceae	Shewanella	Shewanella putrefaciens
GCA_003259835.1_ASM325983v1_genomic.fna	gtdb	Bacteroidetes	Flavobacteriia	Flavobacteriales	Flavobacteriaceae	Flavobacterium	Flavobacterium aquaticum
GCA_003312345.1_ASM331234v1_genomic.fna	gtdb	Proteobacteria	Gammaproteobacteria	Enterobacterales	Pectobacteriaceae	Pectobacterium	Pectobacterium peruviense
GCA_003268895.1_ASM326889v1_genomic.fna	gtdb	Proteobacteria	Betaproteobacteria	Nitrosomonadales	Nitrosomonadaceae	Nitrosospira	Nitrosospira multiformis
GCA_003336745.1_ASM333674v1_genomic.fna	gtdb	Deinococcus-Thermus	Deinococci	Thermales	Thermaceae	Thermus	Thermus caldifontis
GCA_003340445.1_ASM334044v1_genomic.fna	gtdb	Actinobacteria	Coriobacteriia	Eggerthellales	Eggerthellaceae	Eggerthella	Eggerthella lenta
GCA_003336705.1_ASM333670v1_genomic.fna	gtdb	Proteobacteria	Gammaproteobacteria	Alteromonadales	Alteromonadaceae	Marinobacter	Marinobacter litoralis
GCA_003343265.1_ASM334326v1_genomic.fna	gtdb	Actinobacteria	Actinobacteria	Micrococcales	Micrococcaceae	Renibacterium	Renibacterium salmoninarum
GCA_003326675.1_ASM332667v1_genomic.fna	gtdb	Proteobacteria	Alphaproteobacteria	Rhodospirillales	Rhodospirillaceae	Thalassospira	Thalassospira profundimaris
GCA_003309065.1_ASM330906v1_genomic.fna	gtdb	Actinobacteria	Actinobacteria	Micrococcales	Micrococcaceae	Glutamicibacter	Glutamicibacter soli
GCA_003287205.1_ASM328720v1_genomic.fna	gtdb	Proteobacteria	Gammaproteobacteria	Oceanospirillales	Halomonadaceae	Halomonas	Halomonas elongata
GCA_003349825.1_ASM334982v1_genomic.fna	gtdb	Proteobacteria	Betaproteobacteria	Burkholderiales	Comamonadaceae	Schlegelella	Schlegelella thermodepolymerans
GCA_003367075.1_ASM336707v1_genomic.fna	gtdb	Cyanobacteria	NA	Nostocales	Aphanizomenonaceae	Cylindrospermopsis	Cylindrospermopsis raciborskii
GCA_003254095.1_ASM325409v1_genomic.fna	gtdb	Bacteroidetes	Flavobacteriia	Flavobacteriales	Flavobacteriaceae	Salegentibacter	Salegentibacter mishustinae
GCA_003268795.1_ASM326879v1_genomic.fna	gtdb	Proteobacteria	Gammaproteobacteria	Enterobacterales	Erwiniaceae	Pantoea	Pantoea ananatis
GCA_003340385.1_ASM334038v1_genomic.fna	gtdb	Actinobacteria	Coriobacteriia	Eggerthellales	Eggerthellaceae	Gordonibacter	Gordonibacter pamelaeae
GCA_003313565.1_ASM331356v1_genomic.fna	gtdb	Firmicutes	Clostridia	Clostridiales	Peptostreptococcaceae	Clostridioides	Clostridioides difficile
GCA_003254185.1_ASM325418v1_genomic.fna	gtdb	Proteobacteria	Alphaproteobacteria	Rhodobacterales	Rhodobacteraceae	Planktotalea	Planktotalea frisia
GCA_003313585.1_ASM331358v1_genomic.fna	gtdb	Firmicutes	Clostridia	Clostridiales	Peptostreptococcaceae	Clostridioides	Clostridioides difficile
GCA_003265475.1_ASM326547v1_genomic.fna	gtdb	Proteobacteria	Gammaproteobacteria	Aeromonadales	Aeromonadaceae	Aeromonas	Aeromonas caviae
GCA_003252835.1_ASM325283v1_genomic.fna	gtdb	Proteobacteria	Gammaproteobacteria	Pasteurellales	Pasteurellaceae	Aggregatibacter	Aggregatibacter aphrophilus
GCA_003384285.1_ASM338428v1_genomic.fna	gtdb	Actinobacteria	Actinobacteria	Propionibacteriales	Propionibacteriaceae	Cutibacterium	Cutibacterium acnes
GCA_003254565.1_ASM325456v1_genomic.fna	gtdb	Bacteroidetes	Flavobacteriia	Flavobacteriales	Flavobacteriaceae	Flavobacterium	Flavobacterium nitrogenifigens
GCA_003265605.1_ASM326560v1_genomic.fna	gtdb	Proteobacteria	Gammaproteobacteria	Aeromonadales	Aeromonadaceae	Aeromonas	Aeromonas caviae
GCA_003244635.1_ASM324463v1_genomic.fna	gtdb	Proteobacteria	Gammaproteobacteria	Xanthomonadales	Xanthomonadaceae	Stenotrophomonas	Stenotrophomonas maltophilia
GCA_003286645.1_ASM328664v1_genomic.fna	gtdb	Firmicutes	Bacilli	Lactobacillales	Aerococcaceae	Aerococcus	Aerococcus urinae
GCA_003340465.1_ASM334046v1_genomic.fna	gtdb	Actinobacteria	Coriobacteriia	Eggerthellales	Eggerthellaceae	Eggerthella	Eggerthella lenta
GCA_003369935.1_ASM336993v1_genomic.fna	gtdb	Actinobacteria	Actinobacteria	Bifidobacteriales	Bifidobacteriaceae	Gardnerella	Gardnerella vaginalis
GCA_003252885.1_ASM325288v1_genomic.fna	gtdb	Proteobacteria	Gammaproteobacteria	Pasteurellales	Pasteurellaceae	Haemophilus	Haemophilus parainfluenzae
GCA_003340165.1_ASM334016v1_genomic.fna	gtdb	Actinobacteria	Coriobacteriia	Eggerthellales	Eggerthellaceae	Eggerthella	Eggerthella lenta
GCA_003217475.1_ASM321747v1_genomic.fna	gtdb	Actinobacteria	Actinobacteria	Corynebacteriales	Williamsiaceae	Williamsia	Williamsia limnetica
GCA_003252875.1_ASM325287v1_genomic.fna	gtdb	Proteobacteria	Gammaproteobacteria	Pasteurellales	Pasteurellaceae	Haemophilus	Haemophilus sputorum
GCA_003336445.1_ASM333644v1_genomic.fna	gtdb	Actinobacteria	Actinobacteria	Streptosporangiales	Nocardiopsaceae	Marinateneraspora	Marinateneraspora sediminis
GCA_003226255.1_ASM322625v1_genomic.fna	gtdb	Proteobacteria	Gammaproteobacteria	Alteromonadales	Idiomarinaceae	Idiomarina	Idiomarina fontislapidosi
GCA_003315195.1_ASM331519v1_genomic.fna	gtdb	Proteobacteria	Betaproteobacteria	Burkholderiales	Sutterellaceae	Sutterella	Sutterella wadsworthensis
GCA_003252725.1_ASM325272v1_genomic.fna	gtdb	Proteobacteria	Gammaproteobacteria	Pasteurellales	Pasteurellaceae	Haemophilus	Haemophilus parainfluenzae
GCA_003326795.1_ASM332679v1_genomic.fna	gtdb	Proteobacteria	Alphaproteobacteria	Rhodospirillales	Rhodospirillaceae	Thalassospira	Thalassospira profundimaris
GCA_003268855.1_ASM326885v1_genomic.fna	gtdb	Bacteroidetes	Flavobacteriia	Flavobacteriales	Flavobacteriaceae	Flavobacterium	Flavobacterium aciduliphilum
GCA_003340075.1_ASM334007v1_genomic.fna	gtdb	Actinobacteria	Coriobacteriia	Eggerthellales	Eggerthellaceae	Eggerthella	Eggerthella lenta
GCA_003340005.1_ASM334000v1_genomic.fna	gtdb	Actinobacteria	Coriobacteriia	Eggerthellales	Eggerthellaceae	Eggerthella	Eggerthella lenta
GCA_003259435.1_ASM325943v1_genomic.fna	gtdb	Bacteroidetes	Chitinophagia	Chitinophagales	Chitinophagaceae	Chitinophaga	Chitinophaga dinghuensis
GCA_003384535.1_ASM338453v1_genomic.fna	gtdb	Actinobacteria	Actinobacteria	Propionibacteriales	Propionibacteriaceae	Cutibacterium	Cutibacterium acnes
GCA_003339815.1_ASM333981v1_genomic.fna	gtdb	Actinobacteria	Coriobacteriia	Eggerthellales	Eggerthellaceae	Eggerthella	Eggerthella sinensis
GCA_003326755.1_ASM332675v1_genomic.fna	gtdb	Proteobacteria	Alphaproteobacteria	Rhodospirillales	Rhodospirillaceae	Thalassospira	Thalassospira profundimaris
GCA_003335295.1_ASM333529v1_genomic.fna	gtdb	Actinobacteria	Actinobacteria	Micrococcales	Dermabacteraceae	Brachybacterium	Brachybacterium alimentarium
GCA_003293895.1_ASM329389v1_genomic.fna	gtdb	Proteobacteria	Betaproteobacteria	Burkholderiales	Alcaligenaceae	Taylorella	Taylorella equigenitalis
GCA_003335435.1_ASM333543v1_genomic.fna	gtdb	Actinobacteria	Actinobacteria	Micrococcales	Brevibacteriaceae	Brevibacterium	Brevibacterium aurantiacum
GCA_003217575.1_ASM321757v1_genomic.fna	gtdb	Proteobacteria	Betaproteobacteria	Burkholderiales	NA	Xylophilus	Xylophilus ampelinus
GCA_003261435.1_ASM326143v1_genomic.fna	gtdb	Proteobacteria	Gammaproteobacteria	Pasteurellales	Pasteurellaceae	Pasteurella	Pasteurella multocida
GCA_003259525.1_ASM325952v1_genomic.fna	gtdb	Bacteroidetes	Flavobacteriia	Flavobacteriales	Flavobacteriaceae	Olleya	Olleya aquimaris
GCA_003264325.1_ASM326432v1_genomic.fna	gtdb	Actinobacteria	Actinobacteria	Micromonosporales	Micromonosporaceae	Micromonospora	Micromonospora saelicesensis
GCA_003252955.1_ASM325295v1_genomic.fna	gtdb	Proteobacteria	Gammaproteobacteria	Pasteurellales	Pasteurellaceae	Aggregatibacter	Aggregatibacter aphrophilus
GCA_003324185.1_ASM332418v1_genomic.fna	gtdb	Firmicutes	Clostridia	Clostridiales	Ruminococcaceae	Faecalibacterium	Faecalibacterium prausnitzii
GCA_003289955.1_ASM328995v1_genomic.fna	gtdb	Firmicutes	Bacilli	Bacillales	Planococcaceae	Planococcus	Planococcus halotolerans
GCA_003326125.1_ASM332612v1_genomic.fna	gtdb	Tenericutes	Mollicutes	Mycoplasmatales	Mycoplasmataceae	Mycoplasma	Mycoplasma hominis
GCA_003346375.1_ASM334637v1_genomic.fna	gtdb	Firmicutes	Bacilli	Lactobacillales	Leuconostocaceae	Leuconostoc	Leuconostoc pseudomesenteroides
GCA_003350405.1_ASM335040v1_genomic.fna	gtdb	Proteobacteria	Alphaproteobacteria	Rhodospirillales	Acetobacteraceae	Gluconacetobacter	Gluconacetobacter liquefaciens
GCA_003265515.1_ASM326551v1_genomic.fna	gtdb	Proteobacteria	Gammaproteobacteria	Aeromonadales	Aeromonadaceae	Aeromonas	Aeromonas salmonicida
GCA_003384525.1_ASM338452v1_genomic.fna	gtdb	Actinobacteria	Actinobacteria	Propionibacteriales	Propionibacteriaceae	Cutibacterium	Cutibacterium acnes
GCA_003384305.1_ASM338430v1_genomic.fna	gtdb	Actinobacteria	Actinobacteria	Propionibacteriales	Propionibacteriaceae	Cutibacterium	Cutibacterium acnes
GCA_003259195.1_ASM325919v1_genomic.fna	gtdb	Proteobacteria	Alphaproteobacteria	Rhodobacterales	Rhodobacteraceae	Paracoccus	Paracoccus sediminilitoris
GCA_003255745.1_ASM325574v1_genomic.fna	gtdb	Proteobacteria	Alphaproteobacteria	Rhodobacterales	Rhodobacteraceae	Paracoccus	Paracoccus saliphilus
GCA_003253075.1_ASM325307v1_genomic.fna	gtdb	Proteobacteria	Gammaproteobacteria	Pasteurellales	Pasteurellaceae	Haemophilus	Haemophilus parahaemolyticus
GCA_003287735.1_ASM328773v1_genomic.fna	gtdb	Proteobacteria	Gammaproteobacteria	Enterobacterales	Morganellaceae	Photorhabdus	Photorhabdus bodei
GCA_003254255.1_ASM325425v1_genomic.fna	gtdb	Firmicutes	Clostridia	Clostridiales	Lachnospiraceae	Lachnoanaerobaculum	Lachnoanaerobaculum umeaense
GCA_003340105.1_ASM334010v1_genomic.fna	gtdb	Actinobacteria	Coriobacteriia	Eggerthellales	Eggerthellaceae	Eggerthella	Eggerthella lenta
GCA_003287375.1_ASM328737v1_genomic.fna	gtdb	Tenericutes	Mollicutes	Mycoplasmatales	Mycoplasmataceae	Mycoplasma	Mycoplasma hominis
GCA_003363485.1_ASM336348v1_genomic.fna	gtdb	Proteobacteria	Gammaproteobacteria	Alteromonadales	Alteromonadaceae	Marinobacter	Marinobacter flavimaris
GCA_003382585.2_ASM338258v2_genomic.fna	gtdb	Proteobacteria	Gammaproteobacteria	Enterobacterales	Pectobacteriaceae	Pectobacterium	Pectobacterium aquaticum
GCA_003335045.1_ASM333504v1_genomic.fna	gtdb	Proteobacteria	Alphaproteobacteria	Rhizobiales	Phyllobacteriaceae	Phyllobacterium	Phyllobacterium salinisoli
GCA_003265425.1_ASM326542v1_genomic.fna	gtdb	Proteobacteria	Gammaproteobacteria	Aeromonadales	Aeromonadaceae	Aeromonas	Aeromonas caviae
GCA_003325675.1_ASM332567v1_genomic.fna	gtdb	Proteobacteria	Alphaproteobacteria	Rhizobiales	Brucellaceae	Ochrobactrum	Ochrobactrum anthropi
GCA_003340315.1_ASM334031v1_genomic.fna	gtdb	Actinobacteria	Coriobacteriia	Eggerthellales	Eggerthellaceae	Slackia	Slackia isoflavoniconvertens
GCA_003290005.1_ASM329000v1_genomic.fna	gtdb	Proteobacteria	Alphaproteobacteria	Rhodobacterales	Rhodobacteraceae	Rhodobacter	Rhodobacter johrii
GCA_003315415.1_ASM331541v1_genomic.fna	gtdb	Actinobacteria	Actinobacteria	Micrococcales	Brevibacteriaceae	Brevibacterium	Brevibacterium celere
GCA_003226565.1_ASM322656v1_genomic.fna	gtdb	Proteobacteria	Betaproteobacteria	Rhodocyclales	Zoogloeaceae	Azoarcus	Azoarcus communis
GCA_003339915.1_ASM333991v1_genomic.fna	gtdb	Actinobacteria	Coriobacteriia	Eggerthellales	Eggerthellaceae	Eggerthella	Eggerthella lenta
GCA_003315025.1_ASM331502v1_genomic.fna	gtdb	Proteobacteria	Gammaproteobacteria	Alteromonadales	Idiomarinaceae	Idiomarina	Idiomarina tainanensis
GCA_003353435.1_ASM335343v1_genomic.fna	gtdb	Proteobacteria	Gammaproteobacteria	Alteromonadales	Idiomarinaceae	Idiomarina	Idiomarina abyssalis
GCA_003287475.1_ASM328747v1_genomic.fna	gtdb	Firmicutes	Clostridia	Clostridiales	Ruminococcaceae	Faecalibacterium	Faecalibacterium prausnitzii
GCA_003298875.1_ASM329887v1_genomic.fna	gtdb	Bacteroidetes	Flavobacteriia	Flavobacteriales	Flavobacteriaceae	Elizabethkingia	Elizabethkingia miricola
GCA_003259745.1_ASM325974v1_genomic.fna	gtdb	Bacteroidetes	Cytophagia	Cytophagales	Cytophagaceae	Larkinella	Larkinella arboricola
GCA_003384315.1_ASM338431v1_genomic.fna	gtdb	Actinobacteria	Actinobacteria	Propionibacteriales	Propionibacteriaceae	Cutibacterium	Cutibacterium acnes
GCA_003337435.1_ASM333743v1_genomic.fna	gtdb	Bacteroidetes	Flavobacteriia	Flavobacteriales	Schleiferiaceae	Schleiferia	Schleiferia thermophila
GCA_003337275.1_ASM333727v1_genomic.fna	gtdb	Proteobacteria	Gammaproteobacteria	Oceanospirillales	Oceanospirillaceae	Marinomonas	Marinomonas foliarum
GCA_003347575.1_ASM334757v1_genomic.fna	gtdb	Proteobacteria	Alphaproteobacteria	Rhodobacterales	Rhodobacteraceae	Epibacterium	Epibacterium mobile
GCA_003315335.1_ASM331533v1_genomic.fna	gtdb	Proteobacteria	Gammaproteobacteria	Enterobacterales	Enterobacteriaceae	Pseudocitrobacter	Pseudocitrobacter faecalis
GCA_003268815.1_ASM326881v1_genomic.fna	gtdb	Bacteroidetes	Flavobacteriia	Flavobacteriales	Flavobacteriaceae	Flavobacterium	Flavobacterium lacus
GCA_003326725.1_ASM332672v1_genomic.fna	gtdb	Proteobacteria	Alphaproteobacteria	Rhodospirillales	Rhodospirillaceae	Thalassospira	Thalassospira xiamenensis
GCA_003384415.1_ASM338441v1_genomic.fna	gtdb	Actinobacteria	Actinobacteria	Propionibacteriales	Propionibacteriaceae	Cutibacterium	Cutibacterium acnes
GCA_003382595.2_ASM338259v2_genomic.fna	gtdb	Proteobacteria	Gammaproteobacteria	Enterobacterales	Pectobacteriaceae	Pectobacterium	Pectobacterium aquaticum
GCA_003315405.1_ASM331540v1_genomic.fna	gtdb	Actinobacteria	Actinobacteria	Micrococcales	Brevibacteriaceae	Brevibacterium	Brevibacterium sanguinis
GCA_003384195.1_ASM338419v1_genomic.fna	gtdb	Actinobacteria	Actinobacteria	Propionibacteriales	Propionibacteriaceae	Cutibacterium	Cutibacterium acnes
GCA_003286665.1_ASM328666v1_genomic.fna	gtdb	Firmicutes	Bacilli	Lactobacillales	Aerococcaceae	Aerococcus	Aerococcus urinae
GCA_003340395.1_ASM334039v1_genomic.fna	gtdb	Actinobacteria	Coriobacteriia	Eggerthellales	Eggerthellaceae	Eggerthella	Eggerthella lenta
GCA_003346165.1_ASM334616v1_genomic.fna	gtdb	Firmicutes	Bacilli	Lactobacillales	Leuconostocaceae	Leuconostoc	Leuconostoc mesenteroides
GCA_003335105.1_ASM333510v1_genomic.fna	gtdb	Proteobacteria	Gammaproteobacteria	Xanthomonadales	Rhodanobacteraceae	Rhodanobacter	Rhodanobacter denitrificans
GCA_003346345.1_ASM334634v1_genomic.fna	gtdb	Firmicutes	Bacilli	Lactobacillales	Leuconostocaceae	Leuconostoc	Leuconostoc mesenteroides
GCA_003254055.1_ASM325405v1_genomic.fna	gtdb	Bacteroidetes	Cytophagia	Cytophagales	Cyclobacteriaceae	Algoriphagus	Algoriphagus chordae
GCA_003315175.1_ASM331517v1_genomic.fna	gtdb	Proteobacteria	Betaproteobacteria	Burkholderiales	Alcaligenaceae	Eoetvoesia	Eoetvoesia caeni
GCA_003287575.1_ASM328757v1_genomic.fna	gtdb	Proteobacteria	Gammaproteobacteria	Enterobacterales	Morganellaceae	Photorhabdus	Photorhabdus laumondii
GCA_003363355.1_ASM336335v1_genomic.fna	gtdb	Proteobacteria	Gammaproteobacteria	Pasteurellales	Pasteurellaceae	Haemophilus	Haemophilus influenzae
GCA_003323285.1_ASM332328v1_genomic.fna	gtdb	Proteobacteria	Gammaproteobacteria	Aeromonadales	Aeromonadaceae	Aeromonas	Aeromonas hydrophila
GCA_003345335.1_ASM334533v1_genomic.fna	gtdb	Firmicutes	Clostridia	Clostridiales	Clostridiaceae	Clostridium	Clostridium botulinum
GCA_003315485.1_ASM331548v1_genomic.fna	gtdb	Proteobacteria	Gammaproteobacteria	Oceanospirillales	Oceanospirillaceae	Marinomonas	Marinomonas rhizomae
GCA_003336425.1_ASM333642v1_genomic.fna	gtdb	Actinobacteria	Actinobacteria	Streptosporangiales	Nocardiopsaceae	Marinateneraspora	Marinateneraspora sediminis
GCA_003293615.1_ASM329361v1_genomic.fna	gtdb	Proteobacteria	Betaproteobacteria	Burkholderiales	Alcaligenaceae	Achromobacter	Achromobacter xylosoxidans
GCA_003226435.1_ASM322643v1_genomic.fna	gtdb	Actinobacteria	Actinobacteria	Propionibacteriales	Propionibacteriaceae	Cutibacterium	Cutibacterium acnes
GCA_003335215.1_ASM333521v1_genomic.fna	gtdb	Proteobacteria	Betaproteobacteria	Burkholderiales	Alcaligenaceae	Parvibium	Parvibium lacunae
GCA_003351185.1_ASM335118v1_genomic.fna	gtdb	Proteobacteria	Alphaproteobacteria	Rhizobiales	Rhizobiaceae	Rhizobium	Rhizobium phaseoli
GCA_003363115.1_ASM336311v1_genomic.fna	gtdb	Bacteroidetes	Bacteroidia	Bacteroidales	Bacteroidaceae	Bacteroides	Bacteroides fragilis
GCA_003384385.1_ASM338438v1_genomic.fna	gtdb	Actinobacteria	Actinobacteria	Propionibacteriales	Propionibacteriaceae	Cutibacterium	Cutibacterium acnes
GCA_003254005.1_ASM325400v1_genomic.fna	gtdb	Proteobacteria	Alphaproteobacteria	Rhodobacterales	Rhodobacteraceae	Roseinatronobacter	Roseinatronobacter thiooxidans
GCA_003342795.1_ASM334279v1_genomic.fna	gtdb	Proteobacteria	Gammaproteobacteria	Xanthomonadales	Xanthomonadaceae	Stenotrophomonas	Stenotrophomonas maltophilia
GCA_003337575.1_ASM333757v1_genomic.fna	gtdb	Proteobacteria	Alphaproteobacteria	Rhizobiales	Phyllobacteriaceae	Phyllobacterium	Phyllobacterium bourgognense
GCA_003326095.1_ASM332609v1_genomic.fna	gtdb	Tenericutes	Mollicutes	Mycoplasmatales	Mycoplasmataceae	Mycoplasma	Mycoplasma hominis
GCA_003286805.1_ASM328680v1_genomic.fna	gtdb	Firmicutes	Bacilli	Lactobacillales	Aerococcaceae	Aerococcus	Aerococcus urinae
GCA_003350945.1_ASM335094v1_genomic.fna	gtdb	Firmicutes	Clostridia	Clostridiales	Clostridiaceae	Clostridium	Clostridium perfringens
GCA_003340065.1_ASM334006v1_genomic.fna	gtdb	Actinobacteria	Coriobacteriia	Eggerthellales	Eggerthellaceae	Eggerthella	Eggerthella lenta
GCA_003340585.1_ASM334058v1_genomic.fna	gtdb	Proteobacteria	Gammaproteobacteria	Enterobacterales	Morganellaceae	Morganella	Morganella morganii
GCA_003226155.1_ASM322615v1_genomic.fna	gtdb	Proteobacteria	Gammaproteobacteria	Enterobacterales	Enterobacteriaceae	Citrobacter	Citrobacter koseri
GCA_003252645.1_ASM325264v1_genomic.fna	gtdb	Proteobacteria	Gammaproteobacteria	Pasteurellales	Pasteurellaceae	Aggregatibacter	Aggregatibacter segnis
GCA_003346155.1_ASM334615v1_genomic.fna	gtdb	Firmicutes	Bacilli	Lactobacillales	Leuconostocaceae	Leuconostoc	Leuconostoc mesenteroides
GCA_003265245.1_ASM326524v1_genomic.fna	gtdb	Proteobacteria	Gammaproteobacteria	Enterobacterales	Enterobacteriaceae	Shigella	Shigella sonnei
GCA_003350165.1_ASM335016v1_genomic.fna	gtdb	Proteobacteria	Gammaproteobacteria	Aeromonadales	Aeromonadaceae	Aeromonas	Aeromonas caviae
GCA_003384395.1_ASM338439v1_genomic.fna	gtdb	Actinobacteria	Actinobacteria	Propionibacteriales	Propionibacteriaceae	Cutibacterium	Cutibacterium acnes
GCA_003298795.1_ASM329879v1_genomic.fna	gtdb	Proteobacteria	Gammaproteobacteria	Oceanospirillales	Halomonadaceae	Halomonas	Halomonas sulfidaeris
GCA_003351505.1_ASM335150v1_genomic.fna	gtdb	Proteobacteria	Gammaproteobacteria	Pasteurellales	Pasteurellaceae	Haemophilus	Haemophilus influenzae
GCA_003337565.1_ASM333756v1_genomic.fna	gtdb	Proteobacteria	Alphaproteobacteria	Rhodobacterales	Rhodobacteraceae	Paracoccus	Paracoccus lutimaris
GCA_003259905.1_ASM325990v1_genomic.fna	gtdb	Proteobacteria	Alphaproteobacteria	Rhodobacterales	Rhodobacteraceae	Salipiger	Salipiger aestuarii
GCA_003384175.1_ASM338417v1_genomic.fna	gtdb	Actinobacteria	Actinobacteria	Propionibacteriales	Propionibacteriaceae	Cutibacterium	Cutibacterium acnes
GCA_003293845.1_ASM329384v1_genomic.fna	gtdb	Bacteroidetes	Flavobacteriia	Flavobacteriales	Flavobacteriaceae	Flavobacterium	Flavobacterium tibetense
GCA_003293675.1_ASM329367v1_genomic.fna	gtdb	Actinobacteria	Actinobacteria	Bifidobacteriales	Bifidobacteriaceae	Gardnerella	Gardnerella vaginalis
GCA_003382645.2_ASM338264v2_genomic.fna	gtdb	Proteobacteria	Gammaproteobacteria	Enterobacterales	Pectobacteriaceae	Pectobacterium	Pectobacterium aquaticum
GCA_003339885.1_ASM333988v1_genomic.fna	gtdb	Actinobacteria	Coriobacteriia	Eggerthellales	Eggerthellaceae	Eggerthella	Eggerthella lenta
GCA_003233695.1_ASM323369v1_genomic.fna	gtdb	Proteobacteria	Gammaproteobacteria	Xanthomonadales	Xanthomonadaceae	Lysobacter	Lysobacter maris
GCA_003336455.1_ASM333645v1_genomic.fna	gtdb	Actinobacteria	Actinobacteria	Streptosporangiales	Nocardiopsaceae	Marinateneraspora	Marinateneraspora sediminis
GCA_003285205.1_ASM328520v1_genomic.fna	gtdb	Proteobacteria	Gammaproteobacteria	Oceanospirillales	Oceanospirillaceae	Marinomonas	Marinomonas primoryensis
GCA_003244715.1_ASM324471v1_genomic.fna	gtdb	Proteobacteria	Gammaproteobacteria	Xanthomonadales	Xanthomonadaceae	Stenotrophomonas	Stenotrophomonas maltophilia
GCA_003252655.1_ASM325265v1_genomic.fna	gtdb	Proteobacteria	Gammaproteobacteria	Pasteurellales	Pasteurellaceae	Haemophilus	Haemophilus haemolyticus
GCA_003252715.1_ASM325271v1_genomic.fna	gtdb	Proteobacteria	Gammaproteobacteria	Pasteurellales	Pasteurellaceae	Haemophilus	Haemophilus sputorum
GCA_003369965.1_ASM336996v1_genomic.fna	gtdb	Actinobacteria	Actinobacteria	Bifidobacteriales	Bifidobacteriaceae	Gardnerella	Gardnerella vaginalis
GCA_003252795.1_ASM325279v1_genomic.fna	gtdb	Proteobacteria	Gammaproteobacteria	Pasteurellales	Pasteurellaceae	Haemophilus	Haemophilus parainfluenzae
GCA_003244425.1_ASM324442v1_genomic.fna	gtdb	Proteobacteria	Gammaproteobacteria	Xanthomonadales	Xanthomonadaceae	Stenotrophomonas	Stenotrophomonas maltophilia
GCA_003384145.1_ASM338414v1_genomic.fna	gtdb	Actinobacteria	Actinobacteria	Propionibacteriales	Propionibacteriaceae	Cutibacterium	Cutibacterium acnes
GCA_003315095.1_ASM331509v1_genomic.fna	gtdb	Proteobacteria	Betaproteobacteria	Burkholderiales	Alcaligenaceae	Achromobacter	Achromobacter marplatensis
GCA_003350545.1_ASM335054v1_genomic.fna	gtdb	Bacteroidetes	Flavobacteriia	Flavobacteriales	Flavobacteriaceae	Flavobacterium	Flavobacterium glaciei
GCA_003256445.1_ASM325644v1_genomic.fna	gtdb	Proteobacteria	Betaproteobacteria	Burkholderiales	Burkholderiaceae	Ralstonia	Ralstonia pseudosolanacearum
GCA_003264855.1_ASM326485v1_genomic.fna	gtdb	Proteobacteria	Gammaproteobacteria	Xanthomonadales	Rhodanobacteraceae	Dyella	Dyella jiangningensis
GCA_003268875.1_ASM326887v1_genomic.fna	gtdb	Proteobacteria	Betaproteobacteria	Nitrosomonadales	Nitrosomonadaceae	Nitrosospira	Nitrosospira multiformis
GCA_003382285.1_ASM338228v1_genomic.fna	gtdb	Proteobacteria	Gammaproteobacteria	Xanthomonadales	Xanthomonadaceae	Lysobacter	Lysobacter soli
GCA_003335305.1_ASM333530v1_genomic.fna	gtdb	Actinobacteria	Actinobacteria	Micrococcales	Dermabacteraceae	Brachybacterium	Brachybacterium alimentarium
GCA_003254115.1_ASM325411v1_genomic.fna	gtdb	Bacteroidetes	Chitinophagia	Chitinophagales	Chitinophagaceae	Hydrotalea	Hydrotalea sandarakina
GCA_003324115.1_ASM332411v1_genomic.fna	gtdb	Firmicutes	Clostridia	Clostridiales	Ruminococcaceae	Faecalibacterium	Faecalibacterium prausnitzii
GCA_003384445.1_ASM338444v1_genomic.fna	gtdb	Actinobacteria	Actinobacteria	Propionibacteriales	Propionibacteriaceae	Cutibacterium	Cutibacterium acnes
GCA_003367245.1_ASM336724v1_genomic.fna	gtdb	Bacteroidetes	Cytophagia	Cytophagales	Hymenobacteraceae	Pontibacter	Pontibacter diazotrophicus
GCA_003286635.1_ASM328663v1_genomic.fna	gtdb	Firmicutes	Bacilli	Lactobacillales	Aerococcaceae	Aerococcus	Aerococcus urinae
GCA_003337425.1_ASM333742v1_genomic.fna	gtdb	Proteobacteria	Betaproteobacteria	Burkholderiales	Comamonadaceae	Extensimonas	Extensimonas vulgaris
GCA_003326075.1_ASM332607v1_genomic.fna	gtdb	Tenericutes	Mollicutes	Mycoplasmatales	Mycoplasmataceae	Mycoplasma	Mycoplasma hominis
GCA_003269055.1_ASM326905v1_genomic.fna	gtdb	Proteobacteria	Betaproteobacteria	Nitrosomonadales	Nitrosomonadaceae	Nitrosospira	Nitrosospira multiformis
GCA_003350475.1_ASM335047v1_genomic.fna	gtdb	Proteobacteria	Betaproteobacteria	Burkholderiales	Comamonadaceae	Pseudacidovorax	Pseudacidovorax intermedius
GCA_003340015.1_ASM334001v1_genomic.fna	gtdb	Actinobacteria	Coriobacteriia	Eggerthellales	Eggerthellaceae	Eggerthella	Eggerthella lenta
GCA_003253435.1_ASM325343v1_genomic.fna	gtdb	Tenericutes	Mollicutes	Mycoplasmatales	Mycoplasmataceae	Mycoplasma	Mycoplasma auris
GCA_003244735.1_ASM324473v1_genomic.fna	gtdb	Proteobacteria	Gammaproteobacteria	Xanthomonadales	Xanthomonadaceae	Stenotrophomonas	Stenotrophomonas maltophilia
GCA_003369895.1_ASM336989v1_genomic.fna	gtdb	Actinobacteria	Actinobacteria	Bifidobacteriales	Bifidobacteriaceae	Gardnerella	Gardnerella vaginalis
GCA_003261175.1_ASM326117v1_genomic.fna	gtdb	Actinobacteria	Actinobacteria	Micrococcales	Micrococcaceae	Arthrobacter	Arthrobacter globiformis
GCA_003253035.1_ASM325303v1_genomic.fna	gtdb	Proteobacteria	Gammaproteobacteria	Pasteurellales	Pasteurellaceae	Aggregatibacter	Aggregatibacter aphrophilus
GCA_003339875.1_ASM333987v1_genomic.fna	gtdb	Actinobacteria	Coriobacteriia	Eggerthellales	Eggerthellaceae	Eggerthella	Eggerthella lenta
GCA_003340325.1_ASM334032v1_genomic.fna	gtdb	Actinobacteria	Coriobacteriia	Eggerthellales	Eggerthellaceae	Asaccharobacter	Asaccharobacter celatus
GCA_003335355.1_ASM333535v1_genomic.fna	gtdb	Actinobacteria	Actinobacteria	Micrococcales	Dermabacteraceae	Brachybacterium	Brachybacterium alimentarium
GCA_003312355.1_ASM331235v1_genomic.fna	gtdb	Proteobacteria	Gammaproteobacteria	Enterobacterales	Pectobacteriaceae	Pectobacterium	Pectobacterium peruviense
GCA_003244625.1_ASM324462v1_genomic.fna	gtdb	Proteobacteria	Gammaproteobacteria	Xanthomonadales	Xanthomonadaceae	Stenotrophomonas	Stenotrophomonas maltophilia
GCA_003254355.1_ASM325435v1_genomic.fna	gtdb	Bacteroidetes	Cytophagia	Cytophagales	Cyclobacteriaceae	Algoriphagus	Algoriphagus ratkowskyi
GCA_003340225.1_ASM334022v1_genomic.fna	gtdb	Actinobacteria	Coriobacteriia	Eggerthellales	Eggerthellaceae	Eggerthella	Eggerthella lenta
GCA_003287495.1_ASM328749v1_genomic.fna	gtdb	Firmicutes	Clostridia	Clostridiales	Ruminococcaceae	Faecalibacterium	Faecalibacterium prausnitzii
GCA_003298555.1_ASM329855v1_genomic.fna	gtdb	Tenericutes	Mollicutes	Mycoplasmatales	Mycoplasmataceae	Mycoplasma	Mycoplasma hominis
GCA_003313545.1_ASM331354v1_genomic.fna	gtdb	Firmicutes	Clostridia	Clostridiales	Peptostreptococcaceae	Clostridioides	Clostridioides difficile
GCA_003345615.1_ASM334561v1_genomic.fna	gtdb	Proteobacteria	Gammaproteobacteria	Legionellales	Legionellaceae	Legionella	Legionella pneumophila
GCA_003349965.1_ASM334996v1_genomic.fna	gtdb	Bacteroidetes	Chitinophagia	Chitinophagales	Chitinophagaceae	Niabella	Niabella yanshanensis
GCA_003384255.1_ASM338425v1_genomic.fna	gtdb	Actinobacteria	Actinobacteria	Propionibacteriales	Propionibacteriaceae	Cutibacterium	Cutibacterium acnes
GCA_003313245.1_ASM331324v1_genomic.fna	gtdb	Proteobacteria	Alphaproteobacteria	Rhodobacterales	Rhodobacteraceae	Primorskyibacter	Primorskyibacter marinus
GCA_003363295.1_ASM336329v1_genomic.fna	gtdb	Proteobacteria	Gammaproteobacteria	Enterobacterales	Enterobacteriaceae	Citrobacter	Citrobacter freundii
GCA_003340305.1_ASM334030v1_genomic.fna	gtdb	Actinobacteria	Coriobacteriia	Eggerthellales	Eggerthellaceae	Asaccharobacter	Asaccharobacter celatus
GCA_003252995.1_ASM325299v1_genomic.fna	gtdb	Proteobacteria	Gammaproteobacteria	Pasteurellales	Pasteurellaceae	Aggregatibacter	Aggregatibacter aphrophilus
GCA_003286915.1_ASM328691v1_genomic.fna	gtdb	Bacteroidetes	Cytophagia	Cytophagales	NA	Chryseolinea	Chryseolinea flava
GCA_003362725.1_ASM336272v1_genomic.fna	gtdb	Bacteroidetes	Flavobacteriia	Flavobacteriales	Flavobacteriaceae	Winogradskyella	Winogradskyella aurantiaca
GCA_003327245.1_ASM332724v1_genomic.fna	gtdb	Firmicutes	Clostridia	Clostridiales	Peptostreptococcaceae	Clostridioides	Clostridioides difficile
GCA_003290185.1_ASM329018v1_genomic.fna	gtdb	Bacteroidetes	Flavobacteriia	Flavobacteriales	Flavobacteriaceae	Chryseobacterium	Chryseobacterium lathyri
GCA_003252685.1_ASM325268v1_genomic.fna	gtdb	Proteobacteria	Gammaproteobacteria	Pasteurellales	Pasteurellaceae	Aggregatibacter	Aggregatibacter segnis
GCA_003286875.1_ASM328687v1_genomic.fna	gtdb	Firmicutes	Bacilli	Lactobacillales	Aerococcaceae	Aerococcus	Aerococcus urinae
GCA_003254525.1_ASM325452v1_genomic.fna	gtdb	Proteobacteria	Alphaproteobacteria	Caulobacterales	Caulobacteraceae	Phenylobacterium	Phenylobacterium kunshanense
GCA_003252925.1_ASM325292v1_genomic.fna	gtdb	Proteobacteria	Gammaproteobacteria	Pasteurellales	Pasteurellaceae	Haemophilus	Haemophilus parahaemolyticus
GCA_003256405.1_ASM325640v1_genomic.fna	gtdb	Proteobacteria	Betaproteobacteria	Burkholderiales	Burkholderiaceae	Ralstonia	Ralstonia pseudosolanacearum
GCA_003244435.1_ASM324443v1_genomic.fna	gtdb	Proteobacteria	Gammaproteobacteria	Xanthomonadales	Xanthomonadaceae	Stenotrophomonas	Stenotrophomonas maltophilia
GCA_003384365.1_ASM338436v1_genomic.fna	gtdb	Actinobacteria	Actinobacteria	Propionibacteriales	Propionibacteriaceae	Cutibacterium	Cutibacterium acnes
GCA_003339945.1_ASM333994v1_genomic.fna	gtdb	Actinobacteria	Coriobacteriia	Eggerthellales	Eggerthellaceae	Eggerthella	Eggerthella lenta
GCA_003336765.1_ASM333676v1_genomic.fna	gtdb	Proteobacteria	Alphaproteobacteria	Rhizobiales	Notoacmeibacteraceae	Notoacmeibacter	Notoacmeibacter marinus
GCA_003346395.1_ASM334639v1_genomic.fna	gtdb	Firmicutes	Bacilli	Lactobacillales	Streptococcaceae	Lactococcus	Lactococcus lactis
GCA_003337635.1_ASM333763v1_genomic.fna	gtdb	Proteobacteria	Gammaproteobacteria	Alteromonadales	Idiomarinaceae	Idiomarina	Idiomarina tainanensis
GCA_003288095.1_ASM328809v1_genomic.fna	gtdb	Actinobacteria	Actinobacteria	Corynebacteriales	Nocardiaceae	Rhodococcus	Rhodococcus biphenylivorans
GCA_003350205.1_ASM335020v1_genomic.fna	gtdb	Proteobacteria	Alphaproteobacteria	Caulobacterales	Caulobacteraceae	Brevundimonas	Brevundimonas bullata
GCA_003253055.1_ASM325305v1_genomic.fna	gtdb	Proteobacteria	Gammaproteobacteria	Pasteurellales	Pasteurellaceae	Haemophilus	Haemophilus parainfluenzae
GCA_003261095.1_ASM326109v1_genomic.fna	gtdb	Proteobacteria	Deltaproteobacteria	Desulfobacterales	Desulfobacteraceae	Desulfobacter	Desulfobacter hydrogenophilus
GCA_003298565.1_ASM329856v1_genomic.fna	gtdb	Tenericutes	Mollicutes	Mycoplasmatales	Mycoplasmataceae	Mycoplasma	Mycoplasma hominis
GCA_003350265.1_ASM335026v1_genomic.fna	gtdb	Proteobacteria	Betaproteobacteria	Burkholderiales	Burkholderiaceae	Trinickia	Trinickia caryophylli
GCA_003252855.1_ASM325285v1_genomic.fna	gtdb	Proteobacteria	Gammaproteobacteria	Pasteurellales	Pasteurellaceae	Haemophilus	Haemophilus sputorum
GCA_003351175.1_ASM335117v1_genomic.fna	gtdb	Proteobacteria	Alphaproteobacteria	Rhizobiales	Rhizobiaceae	Rhizobium	Rhizobium grahamii
GCA_003345315.1_ASM334531v1_genomic.fna	gtdb	Firmicutes	Clostridia	Clostridiales	Clostridiaceae	Clostridium	Clostridium botulinum
GCA_003293535.1_ASM329353v1_genomic.fna	gtdb	Proteobacteria	Betaproteobacteria	Burkholderiales	Alcaligenaceae	Achromobacter	Achromobacter insolitus
GCA_003384465.1_ASM338446v1_genomic.fna	gtdb	Actinobacteria	Actinobacteria	Propionibacteriales	Propionibacteriaceae	Cutibacterium	Cutibacterium acnes
GCA_003252755.1_ASM325275v1_genomic.fna	gtdb	Proteobacteria	Gammaproteobacteria	Pasteurellales	Pasteurellaceae	Haemophilus	Haemophilus parainfluenzae
GCA_003384485.1_ASM338448v1_genomic.fna	gtdb	Actinobacteria	Actinobacteria	Propionibacteriales	Propionibacteriaceae	Cutibacterium	Cutibacterium acnes
GCA_003286595.1_ASM328659v1_genomic.fna	gtdb	Firmicutes	Bacilli	Lactobacillales	Aerococcaceae	Aerococcus	Aerococcus urinae
GCA_003350535.1_ASM335053v1_genomic.fna	gtdb	Proteobacteria	Alphaproteobacteria	Rhizobiales	Methylobacteriaceae	Microvirga	Microvirga subterranea
GCA_003384345.1_ASM338434v1_genomic.fna	gtdb	Actinobacteria	Actinobacteria	Propionibacteriales	Propionibacteriaceae	Cutibacterium	Cutibacterium acnes
GCA_003345635.1_ASM334563v1_genomic.fna	gtdb	Proteobacteria	Gammaproteobacteria	Legionellales	Legionellaceae	Legionella	Legionella pneumophila
GCA_003258515.1_ASM325851v1_genomic.fna	gtdb	Proteobacteria	Gammaproteobacteria	Alteromonadales	Alteromonadaceae	Marinobacter	Marinobacter bohaiensis
GCA_003318155.1_ASM331815v1_genomic.fna	gtdb	Proteobacteria	Alphaproteobacteria	Rhodobacterales	Rhodobacteraceae	Phaeobacter	Phaeobacter gallaeciensis
GCA_003298635.1_ASM329863v1_genomic.fna	gtdb	Tenericutes	Mollicutes	Mycoplasmatales	Mycoplasmataceae	Mycoplasma	Mycoplasma hominis
GCA_003286825.1_ASM328682v1_genomic.fna	gtdb	Firmicutes	Bacilli	Lactobacillales	Aerococcaceae	Aerococcus	Aerococcus urinae
GCA_003340405.1_ASM334040v1_genomic.fna	gtdb	Actinobacteria	Coriobacteriia	Eggerthellales	Eggerthellaceae	Eggerthella	Eggerthella lenta
GCA_003384555.1_ASM338455v1_genomic.fna	gtdb	Actinobacteria	Actinobacteria	Propionibacteriales	Propionibacteriaceae	Cutibacterium	Cutibacterium acnes
GCA_003384585.1_ASM338458v1_genomic.fna	gtdb	Actinobacteria	Actinobacteria	Propionibacteriales	Propionibacteriaceae	Cutibacterium	Cutibacterium acnes
GCA_003265595.1_ASM326559v1_genomic.fna	gtdb	Proteobacteria	Gammaproteobacteria	Aeromonadales	Aeromonadaceae	Aeromonas	Aeromonas media
GCA_003315775.1_ASM331577v1_genomic.fna	gtdb	Firmicutes	Negativicutes	Veillonellales	Veillonellaceae	Megasphaera	Megasphaera hexanoica
GCA_003286735.1_ASM328673v1_genomic.fna	gtdb	Firmicutes	Bacilli	Lactobacillales	Aerococcaceae	Aerococcus	Aerococcus urinae
GCA_003284885.1_ASM328488v1_genomic.fna	gtdb	Proteobacteria	Gammaproteobacteria	Enterobacterales	Yersiniaceae	Serratia	Serratia marcescens
GCA_003260205.1_ASM326020v1_genomic.fna	gtdb	Bacteroidetes	Flavobacteriia	Flavobacteriales	Flavobacteriaceae	Winogradskyella	Winogradskyella tangerina
GCA_003293745.1_ASM329374v1_genomic.fna	gtdb	Proteobacteria	Betaproteobacteria	Burkholderiales	Oxalobacteraceae	Herminiimonas	Herminiimonas fonticola
GCA_003326595.1_ASM332659v1_genomic.fna	gtdb	Proteobacteria	Alphaproteobacteria	Rhodospirillales	Rhodospirillaceae	Thalassospira	Thalassospira lucentensis
GCA_003252805.1_ASM325280v1_genomic.fna	gtdb	Proteobacteria	Gammaproteobacteria	Pasteurellales	Pasteurellaceae	Aggregatibacter	Aggregatibacter aphrophilus
GCA_003284505.1_ASM328450v1_genomic.fna	gtdb	Firmicutes	Bacilli	Lactobacillales	Leuconostocaceae	Weissella	Weissella confusa
GCA_003335395.1_ASM333539v1_genomic.fna	gtdb	Actinobacteria	Actinobacteria	Micrococcales	Brevibacteriaceae	Brevibacterium	Brevibacterium aurantiacum
GCA_003384495.1_ASM338449v1_genomic.fna	gtdb	Actinobacteria	Actinobacteria	Propionibacteriales	Propionibacteriaceae	Cutibacterium	Cutibacterium acnes
GCA_003265545.1_ASM326554v1_genomic.fna	gtdb	Proteobacteria	Gammaproteobacteria	Aeromonadales	Aeromonadaceae	Aeromonas	Aeromonas veronii
GCA_003286755.1_ASM328675v1_genomic.fna	gtdb	Firmicutes	Bacilli	Lactobacillales	Aerococcaceae	Aerococcus	Aerococcus urinae
GCA_003335315.1_ASM333531v1_genomic.fna	gtdb	Actinobacteria	Actinobacteria	Micrococcales	Dermabacteraceae	Brachybacterium	Brachybacterium alimentarium
GCA_003326045.1_ASM332604v1_genomic.fna	gtdb	Tenericutes	Mollicutes	Mycoplasmatales	Mycoplasmataceae	Mycoplasma	Mycoplasma hominis
GCA_003345755.1_ASM334575v1_genomic.fna	gtdb	Proteobacteria	Gammaproteobacteria	Aeromonadales	Aeromonadaceae	Aeromonas	Aeromonas veronii
GCA_003344805.1_ASM334480v1_genomic.fna	gtdb	Proteobacteria	Alphaproteobacteria	Rhodobacterales	Rhodobacteraceae	Paracoccus	Paracoccus versutus
GCA_003265565.1_ASM326556v1_genomic.fna	gtdb	Proteobacteria	Gammaproteobacteria	Aeromonadales	Aeromonadaceae	Aeromonas	Aeromonas bivalvium
GCA_003332855.1_ASM333285v1_genomic.fna	gtdb	Proteobacteria	Alphaproteobacteria	Sphingomonadales	Sphingomonadaceae	Sphingomonas	Sphingomonas ginsengisoli
GCA_003244855.1_ASM324485v1_genomic.fna	gtdb	Proteobacteria	Gammaproteobacteria	Xanthomonadales	Xanthomonadaceae	Stenotrophomonas	Stenotrophomonas maltophilia
GCA_003363135.1_ASM336313v1_genomic.fna	gtdb	Proteobacteria	Alphaproteobacteria	Sphingomonadales	Erythrobacteraceae	Erythrobacter	Erythrobacter lutimaris
GCA_003340345.1_ASM334034v1_genomic.fna	gtdb	Actinobacteria	Coriobacteriia	Eggerthellales	Eggerthellaceae	Paraeggerthella	Paraeggerthella hongkongensis
GCA_003337515.1_ASM333751v1_genomic.fna	gtdb	Proteobacteria	Gammaproteobacteria	Alteromonadales	Alteromonadaceae	Marinobacter	Marinobacter hydrocarbonoclasticus
GCA_003252965.1_ASM325296v1_genomic.fna	gtdb	Proteobacteria	Gammaproteobacteria	Pasteurellales	Pasteurellaceae	Aggregatibacter	Aggregatibacter aphrophilus
GCA_003268295.1_ASM326829v1_genomic.fna	gtdb	Proteobacteria	Gammaproteobacteria	Pasteurellales	Pasteurellaceae	Pasteurella	Pasteurella multocida
GCA_003335265.1_ASM333526v1_genomic.fna	gtdb	Actinobacteria	Actinobacteria	Micrococcales	Dermabacteraceae	Brachybacterium	Brachybacterium alimentarium
GCA_003287815.1_ASM328781v1_genomic.fna	gtdb	Proteobacteria	Gammaproteobacteria	Enterobacterales	Morganellaceae	Morganella	Morganella morganii
GCA_003337655.1_ASM333765v1_genomic.fna	gtdb	Proteobacteria	Gammaproteobacteria	Alteromonadales	Alteromonadaceae	Marinobacter	Marinobacter hydrocarbonoclasticus
GCA_003363065.1_BU_RsIL106_genomic.fna	gtdb	Proteobacteria	Alphaproteobacteria	Rhodobacterales	Rhodobacteraceae	Rhodobacter	Rhodobacter sphaeroides
GCA_003335365.1_ASM333536v1_genomic.fna	gtdb	Actinobacteria	Actinobacteria	Micrococcales	Brevibacteriaceae	Brevibacterium	Brevibacterium aurantiacum
GCA_003287455.1_ASM328745v1_genomic.fna	gtdb	Firmicutes	Clostridia	Clostridiales	Ruminococcaceae	Faecalibacterium	Faecalibacterium prausnitzii
GCA_003327285.1_ASM332728v1_genomic.fna	gtdb	Actinobacteria	Actinobacteria	Micrococcales	Microbacteriaceae	Microbacterium	Microbacterium sorbitolivorans
GCA_003287875.1_ASM328787v1_genomic.fna	gtdb	Proteobacteria	Alphaproteobacteria	Rhizobiales	Rhizobiaceae	Rhizobium	Rhizobium tropici
GCA_003252915.1_ASM325291v1_genomic.fna	gtdb	Proteobacteria	Gammaproteobacteria	Pasteurellales	Pasteurellaceae	Haemophilus	Haemophilus parainfluenzae
GCA_003350115.1_ASM335011v1_genomic.fna	gtdb	Proteobacteria	Alphaproteobacteria	Rhizobiales	Phyllobacteriaceae	Phyllobacterium	Phyllobacterium myrsinacearum
GCA_003314795.2_ASM331479v2_genomic.fna	gtdb	Proteobacteria	Alphaproteobacteria	Sphingomonadales	Sphingomonadaceae	Sphingomonas	Sphingomonas paucimobilis
GCA_003335415.1_ASM333541v1_genomic.fna	gtdb	Actinobacteria	Actinobacteria	Micrococcales	Dermabacteraceae	Brachybacterium	Brachybacterium alimentarium
GCA_003254335.1_ASM325433v1_genomic.fna	gtdb	Proteobacteria	Alphaproteobacteria	Rhodobacterales	Rhodobacteraceae	Cereibacter	Cereibacter changlensis
GCA_003253115.1_ASM325311v1_genomic.fna	gtdb	Proteobacteria	Gammaproteobacteria	Pasteurellales	Pasteurellaceae	Haemophilus	Haemophilus paraphrohaemolyticus
GCA_003265495.1_ASM326549v1_genomic.fna	gtdb	Proteobacteria	Gammaproteobacteria	Aeromonadales	Aeromonadaceae	Aeromonas	Aeromonas allosaccharophila
GCA_003261475.1_ASM326147v1_genomic.fna	gtdb	Proteobacteria	Gammaproteobacteria	Pasteurellales	Pasteurellaceae	Pasteurella	Pasteurella multocida
GCA_003286695.1_ASM328669v1_genomic.fna	gtdb	Firmicutes	Bacilli	Lactobacillales	Aerococcaceae	Aerococcus	Aerococcus urinae
GCA_003353445.1_ASM335344v1_genomic.fna	gtdb	Firmicutes	Bacilli	Lactobacillales	Leuconostocaceae	Weissella	Weissella soli
GCA_003384225.1_ASM338422v1_genomic.fna	gtdb	Actinobacteria	Actinobacteria	Propionibacteriales	Propionibacteriaceae	Cutibacterium	Cutibacterium acnes
GCA_003340245.1_ASM334024v1_genomic.fna	gtdb	Actinobacteria	Coriobacteriia	Eggerthellales	Eggerthellaceae	Eggerthella	Eggerthella lenta
GCA_003315345.1_ASM331534v1_genomic.fna	gtdb	Proteobacteria	Gammaproteobacteria	Alteromonadales	Alteromonadaceae	Marinobacter	Marinobacter pelagius
GCA_003287415.1_ASM328741v1_genomic.fna	gtdb	Firmicutes	Clostridia	Clostridiales	Ruminococcaceae	Faecalibacterium	Faecalibacterium prausnitzii
GCA_003340045.1_ASM334004v1_genomic.fna	gtdb	Actinobacteria	Coriobacteriia	Eggerthellales	Eggerthellaceae	Eggerthella	Eggerthella lenta
GCA_003263475.1_ASM326347v1_genomic.fna	gtdb	Proteobacteria	Betaproteobacteria	Burkholderiales	Oxalobacteraceae	Herbaspirillum	Herbaspirillum rubrisubalbicans
GCA_003286585.1_ASM328658v1_genomic.fna	gtdb	Firmicutes	Bacilli	Lactobacillales	Aerococcaceae	Aerococcus	Aerococcus urinae
GCA_003252775.1_ASM325277v1_genomic.fna	gtdb	Proteobacteria	Gammaproteobacteria	Pasteurellales	Pasteurellaceae	Haemophilus	Haemophilus parainfluenzae
GCA_003314975.1_ASM331497v1_genomic.fna	gtdb	Proteobacteria	Gammaproteobacteria	Oceanospirillales	Oceanospirillaceae	Marinomonas	Marinomonas aquiplantarum
GCA_003289925.1_ASM328992v1_genomic.fna	gtdb	Firmicutes	Bacilli	Bacillales	Planococcaceae	Planococcus	Planococcus maitriensis
GCA_000241305.2_ASM24130v2_genomic.fna	gtdb	Actinobacteria	Actinobacteria	Corynebacteriales	Gordoniaceae	Gordonia	Gordonia effusa
GCA_000245935.1_Bruc_abor_bv1_NI016_V1_genomic.fna	gtdb	Proteobacteria	Alphaproteobacteria	Rhizobiales	Brucellaceae	Brucella	Brucella abortus
GCA_000239295.1_ASM23929v1_genomic.fna	gtdb	Firmicutes	Clostridia	Clostridiales	Ruminococcaceae	Flavonifractor	Flavonifractor plautii
GCA_000191405.1_ASM19140v1_genomic.fna	gtdb	Proteobacteria	Gammaproteobacteria	Pasteurellales	Pasteurellaceae	Haemophilus	Haemophilus parainfluenzae
GCA_000205165.1_ASM20516v1_genomic.fna	gtdb	Bacteroidetes	Bacteroidia	Bacteroidales	Prevotellaceae	Paraprevotella	Paraprevotella xylaniphila
GCA_000187895.1_ASM18789v1_genomic.fna	gtdb	Bacteroidetes	Bacteroidia	Bacteroidales	Bacteroidaceae	Bacteroides	Bacteroides plebeius
GCA_000242815.2_ASM24281v2_genomic.fna	gtdb	Proteobacteria	Betaproteobacteria	Burkholderiales	Oxalobacteraceae	Janthinobacterium	Janthinobacterium lividum
GCA_000269365.1_ASM26936v1_genomic.fna	gtdb	Proteobacteria	Gammaproteobacteria	Enterobacterales	Yersiniaceae	Yersinia	Yersinia pestis
GCA_000263575.1_ASM26357v1_genomic.fna	gtdb	Actinobacteria	Actinobacteria	Bifidobacteriales	Bifidobacteriaceae	Gardnerella	Gardnerella vaginalis
GCA_000263555.1_ASM26355v1_genomic.fna	gtdb	Actinobacteria	Actinobacteria	Bifidobacteriales	Bifidobacteriaceae	Gardnerella	Gardnerella vaginalis
GCA_000234355.2_ASM23435v1_genomic.fna	gtdb	Proteobacteria	Alphaproteobacteria	Rhodospirillales	Acetobacteraceae	Gluconobacter	Gluconobacter morbifer
GCA_000260115.1_ASM26011v1_genomic.fna	gtdb	Bacteroidetes	Flavobacteriia	Flavobacteriales	Flavobacteriaceae	Joostella	Joostella marina
GCA_000255815.1_ASM25581v1_genomic.fna	gtdb	Proteobacteria	Gammaproteobacteria	Enterobacterales	Yersiniaceae	Yersinia	Yersinia pestis
GCA_000209735.1_ASM20973v1_genomic.fna	gtdb	Tenericutes	Mollicutes	Mycoplasmatales	Mycoplasmataceae	Mycoplasma	Mycoplasma fermentans
GCA_000252125.2_ASM25212v2_genomic.fna	gtdb	Bacteroidetes	Flavobacteriia	Flavobacteriales	Flavobacteriaceae	Flavobacterium	Flavobacterium frigoris
GCA_000185705.2_Bilo_wads_3_1_6_V2_genomic.fna	gtdb	Proteobacteria	Deltaproteobacteria	Desulfovibrionales	Desulfovibrionaceae	Bilophila	Bilophila wadsworthia
GCA_000231255.1_Aggr_aphr_F0387_V1_genomic.fna	gtdb	Proteobacteria	Gammaproteobacteria	Pasteurellales	Pasteurellaceae	Aggregatibacter	Aggregatibacter aphrophilus
GCA_000231445.2_ASM23144v1_genomic.fna	gtdb	Proteobacteria	Alphaproteobacteria	Rhodospirillales	Acetobacteraceae	Commensalibacter	Commensalibacter intestini
GCA_000184135.2_ASM18413v2_genomic.fna	gtdb	Bacteroidetes	Flavobacteriia	Flavobacteriales	Flavobacteriaceae	Riemerella	Riemerella anatipestifer
GCA_000185745.1_ASM18574v1_genomic.fna	gtdb	Proteobacteria	Betaproteobacteria	Burkholderiales	Alcaligenaceae	Taylorella	Taylorella equigenitalis
GCA_000248055.2_ASM24805v2_genomic.fna	gtdb	Actinobacteria	Actinobacteria	Corynebacteriales	Gordoniaceae	Gordonia	Gordonia sputi
GCA_000261525.1_43297_genomic.fna	gtdb	Proteobacteria	Alphaproteobacteria	Rhizobiales	Bradyrhizobiaceae	Bradyrhizobium	Bradyrhizobium elkanii
GCA_000231345.2_ASM23134v2_genomic.fna	gtdb	Proteobacteria	Gammaproteobacteria	Alteromonadales	Shewanellaceae	Shewanella	Shewanella baltica
GCA_000242915.2_ASM24291v2_genomic.fna	gtdb	Proteobacteria	Epsilonproteobacteria	Campylobacterales	Helicobacteraceae	Sulfurimonas	Sulfurimonas gotlandica
GCA_000257885.1_ASM25788v1_genomic.fna	gtdb	Actinobacteria	Actinobacteria	Corynebacteriales	Corynebacteriaceae	Corynebacterium	Corynebacterium diphtheriae
GCA_000192475.2_ASM19247v1_genomic.fna	gtdb	Proteobacteria	Alphaproteobacteria	Rhodobacterales	Rhodobacteraceae	Ruegeria	Ruegeria conchae
GCA_000220545.2_ASM22054v2_genomic.fna	gtdb	Proteobacteria	Gammaproteobacteria	Oceanospirillales	Oceanospirillaceae	Marinobacterium	Marinobacterium stanieri
GCA_000260835.1_ASM26083v1_genomic.fna	gtdb	Bacteroidetes	Flavobacteriia	Flavobacteriales	Flavobacteriaceae	Imtechella	Imtechella halotolerans
GCA_000193025.2_ASM19302v2_genomic.fna	gtdb	Proteobacteria	Gammaproteobacteria	Pseudomonadales	Moraxellaceae	Moraxella	Moraxella catarrhalis
GCA_000233995.2_ASM23399v1_genomic.fna	gtdb	Proteobacteria	Alphaproteobacteria	Rhizobiales	Phyllobacteriaceae	Mesorhizobium	Mesorhizobium amorphae
GCA_000245855.1_Bruc_abor_bv1_NI486_V1_genomic.fna	gtdb	Proteobacteria	Alphaproteobacteria	Rhizobiales	Brucellaceae	Brucella	Brucella abortus
GCA_000218325.1_Bact_ovat_3_8_47FAA_V1_genomic.fna	gtdb	Bacteroidetes	Bacteroidia	Bacteroidales	Bacteroidaceae	Bacteroides	Bacteroides ovatus
GCA_000192985.2_ASM19298v2_genomic.fna	gtdb	Proteobacteria	Gammaproteobacteria	Pseudomonadales	Moraxellaceae	Moraxella	Moraxella catarrhalis
GCA_000212475.2_LacGar1.0_genomic.fna	gtdb	Firmicutes	Bacilli	Lactobacillales	Streptococcaceae	Lactococcus	Lactococcus garvieae
GCA_000236945.2_ASM23694v2_genomic.fna	gtdb	Proteobacteria	Alphaproteobacteria	Rhizobiales	Rhizobiaceae	Sinorhizobium	Sinorhizobium meliloti
GCA_000269065.1_ASM26906v1_genomic.fna	gtdb	Proteobacteria	Gammaproteobacteria	Enterobacterales	Yersiniaceae	Yersinia	Yersinia pestis
GCA_000246795.1_ASM24679v1_genomic.fna	gtdb	Spirochaetes	Spirochaetia	Spirochaetales	Spirochaetaceae	Treponema	Treponema pallidum
GCA_000238075.1_Oribacterium_sp_ACB7_V1_genomic.fna	gtdb	Firmicutes	Clostridia	Clostridiales	Lachnospiraceae	Oribacterium	Oribacterium asaccharolyticum
GCA_000226795.3_AaD18P-1v2.0_genomic.fna	gtdb	Proteobacteria	Gammaproteobacteria	Pasteurellales	Pasteurellaceae	Aggregatibacter	Aggregatibacter actinomycetemcomitans
GCA_000225825.2_ASM22582v2_genomic.fna	gtdb	Actinobacteria	Actinobacteria	Micrococcales	Dermabacteraceae	Brachybacterium	Brachybacterium squillarum
GCA_000268745.1_ASM26874v1_genomic.fna	gtdb	Proteobacteria	Gammaproteobacteria	Enterobacterales	Yersiniaceae	Yersinia	Yersinia pestis
GCA_000226955.2_ASM22695v2_genomic.fna	gtdb	Proteobacteria	Alphaproteobacteria	Sphingomonadales	Sphingomonadaceae	Sphingomonas	Sphingomonas elodea
GCA_000239695.1_Acti_grae_C83_V1_genomic.fna	gtdb	Actinobacteria	Actinobacteria	Actinomycetales	Actinomycetaceae	Actinomyces	Actinomyces graevenitzii
GCA_000210395.1_ASM21039v1_genomic.fna	gtdb	Firmicutes	Clostridia	Clostridiales	Peptostreptococcaceae	Clostridioides	Clostridioides difficile
GCA_000241025.2_ASM24102v2_genomic.fna	gtdb	Proteobacteria	Gammaproteobacteria	Pasteurellales	Pasteurellaceae	Aggregatibacter	Aggregatibacter actinomycetemcomitans
GCA_000227295.1_ASM22729v1_genomic.fna	gtdb	Actinobacteria	Actinobacteria	Propionibacteriales	Propionibacteriaceae	Cutibacterium	Cutibacterium avidum
GCA_000192905.2_ASM19290v2_genomic.fna	gtdb	Proteobacteria	Gammaproteobacteria	Pseudomonadales	Moraxellaceae	Moraxella	Moraxella catarrhalis
GCA_000264375.1_Rh18863_genomic.fna	gtdb	Proteobacteria	Gammaproteobacteria	Xanthomonadales	Rhodanobacteraceae	Rhodanobacter	Rhodanobacter thiooxydans
GCA_000183225.1_ASM18322v1_genomic.fna	gtdb	Proteobacteria	Gammaproteobacteria	Enterobacterales	Erwiniaceae	Buchnera	Buchnera aphidicola
GCA_000239935.2_ASM23993v2_genomic.fna	gtdb	Firmicutes	Bacilli	Lactobacillales	Leuconostocaceae	Leuconostoc	Leuconostoc citreum
GCA_000193245.2_ASM19324v1_genomic.fna	gtdb	Proteobacteria	Alphaproteobacteria	Rhodospirillales	Acetobacteraceae	Acetobacter	Acetobacter pomorum
GCA_000196215.1_ASM19621v1_genomic.fna	gtdb	Spirochaetes	Spirochaetia	Spirochaetales	Borreliaceae	Borreliella	Borreliella bavariensis
GCA_000261605.1_25435_genomic.fna	gtdb	Proteobacteria	Alphaproteobacteria	Rhizobiales	Bradyrhizobiaceae	Bradyrhizobium	Bradyrhizobium japonicum
GCA_000194865.1_ASM19486v1_genomic.fna	gtdb	Actinobacteria	Actinobacteria	Propionibacteriales	Propionibacteriaceae	Cutibacterium	Cutibacterium acnes
GCA_000266865.1_ASM26686v1_genomic.fna	gtdb	Tenericutes	Mollicutes	Mycoplasmatales	Mycoplasmataceae	Mycoplasma	Mycoplasma agalactiae
GCA_000185385.1_ASM18538v1_genomic.fna	gtdb	Firmicutes	Clostridia	Clostridiales	Lachnospiraceae	Lachnoanaerobaculum	Lachnoanaerobaculum saburreum
GCA_000253115.1_ASM25311v1_genomic.fna	gtdb	Proteobacteria	Betaproteobacteria	Burkholderiales	NA	Thiomonas	Thiomonas arsenitoxydans
GCA_000263495.1_ASM26349v1_genomic.fna	gtdb	Actinobacteria	Actinobacteria	Bifidobacteriales	Bifidobacteriaceae	Gardnerella	Gardnerella vaginalis
GCA_000264295.1_Rh17631_genomic.fna	gtdb	Proteobacteria	Gammaproteobacteria	Xanthomonadales	Rhodanobacteraceae	Rhodanobacter	Rhodanobacter spathiphylli
GCA_000226495.3_ASM22649v3_genomic.fna	gtdb	Proteobacteria	Gammaproteobacteria	Pasteurellales	Pasteurellaceae	Aggregatibacter	Aggregatibacter aphrophilus
GCA_000213885.2_ASM21388v2_genomic.fna	gtdb	Firmicutes	Bacilli	Lactobacillales	Streptococcaceae	Lactococcus	Lactococcus garvieae
GCA_000246815.1_ASM24681v1_genomic.fna	gtdb	Spirochaetes	Spirochaetia	Spirochaetales	Spirochaetaceae	Treponema	Treponema pallidum
GCA_000244975.1_ASM24497v1_genomic.fna	gtdb	Actinobacteria	Actinobacteria	Pseudonocardiales	Pseudonocardiaceae	Saccharomonospora	Saccharomonospora cyanea
GCA_000223985.2_ASM22398v1_genomic.fna	gtdb	Proteobacteria	Gammaproteobacteria	Chromatiales	Chromatiaceae	Thiocapsa	Thiocapsa marina
GCA_000231365.2_ASM23136v1_genomic.fna	gtdb	Cyanobacteria	NA	Nostocales	Hapalosiphonaceae	Fischerella	Fischerella thermalis
GCA_000263475.1_ASM26347v1_genomic.fna	gtdb	Actinobacteria	Actinobacteria	Bifidobacteriales	Bifidobacteriaceae	Gardnerella	Gardnerella vaginalis
GCA_000262545.1_ASM26254v1_genomic.fna	gtdb	Bacteroidetes	Bacteroidia	Bacteroidales	Prevotellaceae	Prevotella	Prevotella bivia
GCA_000193065.2_ASM19306v2_genomic.fna	gtdb	Proteobacteria	Gammaproteobacteria	Pseudomonadales	Moraxellaceae	Moraxella	Moraxella catarrhalis
GCA_000193045.2_ASM19304v2_genomic.fna	gtdb	Proteobacteria	Gammaproteobacteria	Pseudomonadales	Moraxellaceae	Moraxella	Moraxella catarrhalis
GCA_000183205.2_ASM18320v1_genomic.fna	gtdb	Firmicutes	Bacilli	Lactobacillales	Aerococcaceae	Eremococcus	Eremococcus coleocola
GCA_000214315.2_ASM21431v2_genomic.fna	gtdb	Actinobacteria	Actinobacteria	Bifidobacteriales	Bifidobacteriaceae	Gardnerella	Gardnerella vaginalis
GCA_000204395.2_ASM20439v2_genomic.fna	gtdb	Firmicutes	Clostridia	Clostridiales	Clostridiaceae	Clostridium	Clostridium botulinum
GCA_000191565.1_ASM19156v1_genomic.fna	gtdb	Bacteroidetes	Flavobacteriia	Flavobacteriales	Flavobacteriaceae	Riemerella	Riemerella anatipestifer
GCA_000238795.2_ASM23879v2_genomic.fna	gtdb	Proteobacteria	Gammaproteobacteria	Pasteurellales	Pasteurellaceae	Haemophilus	Haemophilus sputorum
GCA_000255775.1_ASM25577v1_genomic.fna	gtdb	Proteobacteria	Gammaproteobacteria	Enterobacterales	Yersiniaceae	Yersinia	Yersinia pestis
GCA_000261765.1_41267_genomic.fna	gtdb	Proteobacteria	Alphaproteobacteria	Rhizobiales	Bradyrhizobiaceae	Bradyrhizobium	Bradyrhizobium diazoefficiens
GCA_000227545.1_ASM22754v1_genomic.fna	gtdb	Proteobacteria	Alphaproteobacteria	Rhodospirillales	Acetobacteraceae	Komagataeibacter	Komagataeibacter europaeus
GCA_000246715.2_ASM24671v2_genomic.fna	gtdb	Proteobacteria	Alphaproteobacteria	Rickettsiales	Rickettsiaceae	Rickettsia	Rickettsia sibirica
GCA_000241245.2_ASM24124v2_genomic.fna	gtdb	Proteobacteria	Betaproteobacteria	Burkholderiales	Comamonadaceae	Comamonas	Comamonas testosteroni
GCA_000234075.2_Fuso_nucl_F0401_V2_genomic.fna	gtdb	Fusobacteria	Fusobacteriia	Fusobacteriales	Fusobacteriaceae	Fusobacterium	Fusobacterium nucleatum
GCA_000226215.2_ASM22621v2_genomic.fna	gtdb	Actinobacteria	Actinobacteria	Corynebacteriales	Dietziaceae	Dietzia	Dietzia alimentaria
GCA_000226835.3_AaI23Cv2.0_genomic.fna	gtdb	Proteobacteria	Gammaproteobacteria	Pasteurellales	Pasteurellaceae	Aggregatibacter	Aggregatibacter actinomycetemcomitans
GCA_000236865.1_ASM23686v1_genomic.fna	gtdb	Actinobacteria	Coriobacteriia	Coriobacteriales	Coriobacteriaceae	Senegalimassilia	Senegalimassilia anaerobia
GCA_000231055.3_ASM23105v3_genomic.fna	gtdb	Actinobacteria	Actinobacteria	Pseudonocardiales	Pseudonocardiaceae	Saccharomonospora	Saccharomonospora azurea
GCA_000185305.1_ASM18530v1_genomic.fna	gtdb	Proteobacteria	Gammaproteobacteria	Pasteurellales	Pasteurellaceae	Aggregatibacter	Aggregatibacter segnis
GCA_000222045.2_ASM22204v2_genomic.fna	gtdb	Proteobacteria	Gammaproteobacteria	Pasteurellales	Pasteurellaceae	Haemophilus	Haemophilus haemolyticus
GCA_000215505.2_ASM21550v2_genomic.fna	gtdb	Proteobacteria	Alphaproteobacteria	Rickettsiales	Anaplasmataceae	Anaplasma	Anaplasma marginale
GCA_000263595.1_ASM26359v1_genomic.fna	gtdb	Actinobacteria	Actinobacteria	Bifidobacteriales	Bifidobacteriaceae	Gardnerella	Gardnerella vaginalis
GCA_000241525.2_ASM24152v2_genomic.fna	gtdb	Proteobacteria	Betaproteobacteria	Burkholderiales	Comamonadaceae	Comamonas	Comamonas testosteroni
GCA_000245835.1_Bruc_abor_bv1_NI435a_V1_genomic.fna	gtdb	Proteobacteria	Alphaproteobacteria	Rhizobiales	Brucellaceae	Brucella	Brucella abortus
GCA_000242095.1_Myro_odor_CCUG_12901_V1_genomic.fna	gtdb	Bacteroidetes	Flavobacteriia	Flavobacteriales	Flavobacteriaceae	Myroides	Myroides odoratimimus
GCA_000250835.2_ASM25083v2_genomic.fna	gtdb	Proteobacteria	Alphaproteobacteria	Rhizobiales	Brucellaceae	Brucella	Brucella melitensis
GCA_000190375.2_ASM19037v1_genomic.fna	gtdb	Proteobacteria	Betaproteobacteria	Burkholderiales	NA	Rubrivivax	Rubrivivax benzoatilyticus
GCA_000233695.3_ASM23369v3_genomic.fna	gtdb	Proteobacteria	Deltaproteobacteria	Desulfobacterales	Desulfobacteraceae	Desulfobacter	Desulfobacter postgatei
GCA_000189755.3_ASM18975v3_genomic.fna	gtdb	Firmicutes	Clostridia	Clostridiales	Peptococcaceae	Desulfotomaculum	Desulfotomaculum nigrificans
GCA_000183785.2_ASM18378v2_genomic.fna	gtdb	Proteobacteria	Gammaproteobacteria	Enterobacterales	Enterobacteriaceae	Shigella	Shigella flexneri
GCA_000225505.1_ASM22550v1_genomic.fna	gtdb	Actinobacteria	Actinobacteria	Corynebacteriales	Gordoniaceae	Gordonia	Gordonia alkanivorans
GCA_000255835.1_ASM25583v1_genomic.fna	gtdb	Proteobacteria	Gammaproteobacteria	Enterobacterales	Yersiniaceae	Yersinia	Yersinia pestis
GCA_000235975.2_ASM23597v1_genomic.fna	gtdb	Proteobacteria	Alphaproteobacteria	Sphingomonadales	Sphingomonadaceae	Novosphingobium	Novosphingobium pentaromativorans
GCA_000225705.1_Coll_tana_YIT_12063_V1_genomic.fna	gtdb	Actinobacteria	Coriobacteriia	Coriobacteriales	Coriobacteriaceae	Collinsella	Collinsella tanakaei
GCA_000240985.3_AaD17P-3v2.0_genomic.fna	gtdb	Proteobacteria	Gammaproteobacteria	Pasteurellales	Pasteurellaceae	Aggregatibacter	Aggregatibacter actinomycetemcomitans
GCA_000269145.1_ASM26914v1_genomic.fna	gtdb	Proteobacteria	Gammaproteobacteria	Enterobacterales	Yersiniaceae	Yersinia	Yersinia pestis
GCA_000268345.1_ASM26834v1_genomic.fna	gtdb	Proteobacteria	Gammaproteobacteria	Enterobacterales	Yersiniaceae	Yersinia	Yersinia pestis
GCA_000263515.1_ASM26351v1_genomic.fna	gtdb	Actinobacteria	Actinobacteria	Bifidobacteriales	Bifidobacteriaceae	Gardnerella	Gardnerella vaginalis
GCA_000242415.3_ASM24241v3_genomic.fna	gtdb	Proteobacteria	Alphaproteobacteria	Rickettsiales	Anaplasmataceae	Wolbachia	Wolbachia pipientis
GCA_000255895.1_ASM25589v1_genomic.fna	gtdb	Proteobacteria	Gammaproteobacteria	Enterobacterales	Yersiniaceae	Yersinia	Yersinia pestis
GCA_000241955.1_ASM24195v1_genomic.fna	gtdb	Proteobacteria	Gammaproteobacteria	Enterobacterales	Yersiniaceae	Rahnella	Rahnella aquatilis
GCA_000268865.2_ASM26886v2_genomic.fna	gtdb	Proteobacteria	Gammaproteobacteria	Enterobacterales	Yersiniaceae	Yersinia	Yersinia pestis
GCA_000238055.2_Oribacterium_sp_ACB1_V2_genomic.fna	gtdb	Firmicutes	Clostridia	Clostridiales	Lachnospiraceae	Oribacterium	Oribacterium parvum
GCA_000214595.2_ASM21459v1_genomic.fna	gtdb	Proteobacteria	Gammaproteobacteria	Thiotrichales	Piscirickettsiaceae	Methylophaga	Methylophaga aminisulfidivorans
GCA_000218655.1_Fusobacterium_sp_11_3_2_V1_genomic.fna	gtdb	Fusobacteria	Fusobacteriia	Fusobacteriales	Fusobacteriaceae	Fusobacterium	Fusobacterium nucleatum
GCA_000233355.3_Corynebacterium_glutamicum_ATCC14067_genomic.fna	gtdb	Actinobacteria	Actinobacteria	Corynebacteriales	Corynebacteriaceae	Corynebacterium	Corynebacterium glutamicum
GCA_000231275.1_Alis_indi_YIT_V1_genomic.fna	gtdb	Bacteroidetes	Bacteroidia	Bacteroidales	Rikenellaceae	Alistipes	Alistipes indistinctus
GCA_000261325.1_RcoCa1.0_genomic.fna	gtdb	Proteobacteria	Alphaproteobacteria	Rickettsiales	Rickettsiaceae	Rickettsia	Rickettsia conorii
GCA_000186505.1_Sutt_wads_3_1_45B_V1_genomic.fna	gtdb	Proteobacteria	Betaproteobacteria	Burkholderiales	Sutterellaceae	Sutterella	Sutterella wadsworthensis
GCA_000226735.3_AaI63Bv2.0_genomic.fna	gtdb	Proteobacteria	Gammaproteobacteria	Pasteurellales	Pasteurellaceae	Aggregatibacter	Aggregatibacter actinomycetemcomitans
GCA_000243335.1_ASM24333v1_genomic.fna	gtdb	Spirochaetes	Spirochaetia	Leptospirales	Leptospiraceae	Leptonema	Leptonema illini
GCA_000250795.2_ASM25079v2_genomic.fna	gtdb	Proteobacteria	Alphaproteobacteria	Rhizobiales	Brucellaceae	Brucella	Brucella melitensis
GCA_000268845.1_ASM26884v1_genomic.fna	gtdb	Proteobacteria	Gammaproteobacteria	Enterobacterales	Yersiniaceae	Yersinia	Yersinia pestis
GCA_000235805.2_ASM23580v2_genomic.fna	gtdb	Firmicutes	Bacilli	Lactobacillales	Lactobacillaceae	Pediococcus	Pediococcus acidilactici
GCA_000241345.2_ASM24134v2_genomic.fna	gtdb	Actinobacteria	Actinobacteria	Corynebacteriales	Gordoniaceae	Gordonia	Gordonia amarae
GCA_000215025.2_ASM21502v2_genomic.fna	gtdb	Firmicutes	Negativicutes	Veillonellales	Veillonellaceae	Veillonella	Veillonella parvula
GCA_000183605.2_ASM18360v1_genomic.fna	gtdb	Bacteroidetes	Bacteroidia	Bacteroidales	Porphyromonadaceae	Porphyromonas	Porphyromonas asaccharolytica
GCA_000239895.2_ASM23989v2_genomic.fna	gtdb	Firmicutes	Bacilli	Lactobacillales	Leuconostocaceae	Leuconostoc	Leuconostoc citreum
GCA_000268285.2_RPHCH2410v2_genomic.fna	gtdb	Proteobacteria	Alphaproteobacteria	Rhizobiales	Rhizobiaceae	Rhizobium	Rhizobium phaseoli
GCA_000215565.2_ASM21556v2_genomic.fna	gtdb	Proteobacteria	Alphaproteobacteria	Rickettsiales	Anaplasmataceae	Anaplasma	Anaplasma marginale
GCA_000252955.1_ASM25295v1_genomic.fna	gtdb	Proteobacteria	Gammaproteobacteria	Enterobacterales	Morganellaceae	Xenorhabdus	Xenorhabdus nematophila
GCA_000237805.1_ASM23780v1_genomic.fna	gtdb	Synergistetes	Synergistia	Synergistales	Synergistaceae	Jonquetella	Jonquetella anthropi
GCA_000267985.1_ASM26798v1_genomic.fna	gtdb	Proteobacteria	Gammaproteobacteria	Enterobacterales	Enterobacteriaceae	Shigella	Shigella flexneri
GCA_000226755.2_ASM22675v2_genomic.fna	gtdb	Proteobacteria	Gammaproteobacteria	Pasteurellales	Pasteurellaceae	Aggregatibacter	Aggregatibacter actinomycetemcomitans
GCA_000241625.2_ASM24162v2_genomic.fna	gtdb	Proteobacteria	Alphaproteobacteria	Rhodospirillales	Acetobacteraceae	Acetobacter	Acetobacter pasteurianus
GCA_000268905.1_ASM26890v1_genomic.fna	gtdb	Proteobacteria	Gammaproteobacteria	Enterobacterales	Yersiniaceae	Yersinia	Yersinia pestis
GCA_000245915.1_Bruc_abor_bv1_NI010_V1_genomic.fna	gtdb	Proteobacteria	Alphaproteobacteria	Rhizobiales	Brucellaceae	Brucella	Brucella abortus
GCA_000233975.2_ASM23397v2_genomic.fna	gtdb	Proteobacteria	Alphaproteobacteria	Rhizobiales	Rhizobiaceae	Agrobacterium	Agrobacterium tumefaciens
GCA_000268325.1_ASM26832v1_genomic.fna	gtdb	Proteobacteria	Gammaproteobacteria	Enterobacterales	Yersiniaceae	Yersinia	Yersinia pestis
GCA_000184945.1_ASM18494v1_genomic.fna	gtdb	Bacteroidetes	Bacteroidia	Bacteroidales	Prevotellaceae	Prevotella	Prevotella buccae
GCA_000226855.3_AaSCC2302v2.0_genomic.fna	gtdb	Proteobacteria	Gammaproteobacteria	Pasteurellales	Pasteurellaceae	Aggregatibacter	Aggregatibacter actinomycetemcomitans
GCA_000213695.2_ASM21369v2_genomic.fna	gtdb	Proteobacteria	Gammaproteobacteria	Enterobacterales	Enterobacteriaceae	Shigella	Shigella flexneri
GCA_000209575.2_ASM20957v2_genomic.fna	gtdb	Proteobacteria	Alphaproteobacteria	Rhizobiales	Brucellaceae	Brucella	Brucella melitensis
GCA_000220215.1_ASM22021v1_genomic.fna	gtdb	Bacteroidetes	Bacteroidia	Bacteroidales	Prevotellaceae	Prevotella	Prevotella dentalis
GCA_000263055.1_Rho1.0_genomic.fna	gtdb	Proteobacteria	Alphaproteobacteria	Rickettsiales	Rickettsiaceae	Rickettsia	Rickettsia honei
GCA_000211955.2_ASM21195v2_genomic.fna	gtdb	Proteobacteria	Gammaproteobacteria	Enterobacterales	Enterobacteriaceae	Shigella	Shigella boydii
GCA_000236985.2_ASM23698v2_genomic.fna	gtdb	Actinobacteria	Actinobacteria	Pseudonocardiales	Pseudonocardiaceae	Saccharomonospora	Saccharomonospora azurea
GCA_000221585.2_ASM22158v2_genomic.fna	gtdb	Firmicutes	Tissierellia	Tissierellales	Peptoniphilaceae	Finegoldia	Finegoldia magna
GCA_000213715.2_ASM21371v2_genomic.fna	gtdb	Proteobacteria	Gammaproteobacteria	Enterobacterales	Enterobacteriaceae	Shigella	Shigella flexneri
GCA_000250775.2_ASM25077v2_genomic.fna	gtdb	Proteobacteria	Alphaproteobacteria	Rhizobiales	Brucellaceae	Brucella	Brucella melitensis
GCA_000188175.1_ASM18817v1_genomic.fna	gtdb	Firmicutes	Negativicutes	Acidaminococcales	Acidaminococcaceae	Phascolarctobacterium	Phascolarctobacterium succinatutens
GCA_000218345.1_Bacteroides_sp_2_1_56FAA_V1_genomic.fna	gtdb	Bacteroidetes	Bacteroidia	Bacteroidales	Bacteroidaceae	Bacteroides	Bacteroides fragilis
GCA_000243475.2_ASM24347v2_genomic.fna	gtdb	Proteobacteria	Deltaproteobacteria	Desulfuromonadales	Geobacteraceae	Geobacter	Geobacter metallireducens
GCA_000262405.1_ASM26240v1_genomic.fna	gtdb	Proteobacteria	Alphaproteobacteria	Rhizobiales	Methylobacteriaceae	Microvirga	Microvirga lotononidis
GCA_000194985.1_ASM19498v1_genomic.fna	gtdb	Firmicutes	Negativicutes	Veillonellales	Veillonellaceae	Dialister	Dialister micraerophilus
GCA_000195635.1_ASM19563v1_genomic.fna	gtdb	Bacteroidetes	Bacteroidia	Bacteroidales	Bacteroidaceae	Bacteroides	Bacteroides fluxus
GCA_000227565.1_ASM22756v1_genomic.fna	gtdb	Proteobacteria	Alphaproteobacteria	Rhodospirillales	Acetobacteraceae	Komagataeibacter	Komagataeibacter oboediens
GCA_000263635.1_ASM26363v1_genomic.fna	gtdb	Actinobacteria	Actinobacteria	Bifidobacteriales	Bifidobacteriaceae	Gardnerella	Gardnerella vaginalis
GCA_000192925.2_ASM19292v2_genomic.fna	gtdb	Proteobacteria	Gammaproteobacteria	Pseudomonadales	Moraxellaceae	Moraxella	Moraxella catarrhalis
GCA_000255555.2_ASM25555v2_genomic.fna	gtdb	Spirochaetes	Spirochaetia	Spirochaetales	Spirochaetaceae	Treponema	Treponema saccharophilum
GCA_000242135.1_Myro_odor_CIP_101113_V1_genomic.fna	gtdb	Bacteroidetes	Flavobacteriia	Flavobacteriales	Flavobacteriaceae	Myroides	Myroides odoratimimus
GCA_000261245.1_Blongum16Bv1.0_genomic.fna	gtdb	Actinobacteria	Actinobacteria	Bifidobacteriales	Bifidobacteriaceae	Bifidobacterium	Bifidobacterium longum
GCA_000224335.2_BizArg_1.0_genomic.fna	gtdb	Bacteroidetes	Flavobacteriia	Flavobacteriales	Flavobacteriaceae	Bizionia	Bizionia argentinensis
GCA_000252895.1_ASM25289v1_genomic.fna	gtdb	Proteobacteria	Gammaproteobacteria	Enterobacterales	Enterobacteriaceae	Shigella	Shigella flexneri
GCA_000185145.2_ASM18514v2_genomic.fna	gtdb	Bacteroidetes	Bacteroidia	Bacteroidales	Prevotellaceae	Prevotella	Prevotella oralis
GCA_000246755.1_ASM24675v1_genomic.fna	gtdb	Spirochaetes	Spirochaetia	Spirochaetales	Spirochaetaceae	Treponema	Treponema pallidum
GCA_000245895.1_Bruc_abor_bv1_NI488_V1_genomic.fna	gtdb	Proteobacteria	Alphaproteobacteria	Rhizobiales	Brucellaceae	Brucella	Brucella abortus
GCA_000187105.1_ASM18710v1_genomic.fna	gtdb	Spirochaetes	Spirochaetia	Spirochaetales	Spirochaetaceae	Treponema	Treponema phagedenis
GCA_000255875.1_ASM25587v1_genomic.fna	gtdb	Proteobacteria	Gammaproteobacteria	Enterobacterales	Yersiniaceae	Yersinia	Yersinia pestis
GCA_000245875.1_Bruc_abor_bv1_NI474_V1_genomic.fna	gtdb	Proteobacteria	Alphaproteobacteria	Rhizobiales	Brucellaceae	Brucella	Brucella abortus
GCA_000226775.3_AaSCC393v2.0_genomic.fna	gtdb	Proteobacteria	Gammaproteobacteria	Pasteurellales	Pasteurellaceae	Aggregatibacter	Aggregatibacter actinomycetemcomitans
GCA_000220335.1_ASM22033v1_genomic.fna	gtdb	Firmicutes	Bacilli	Bacillales	Planococcaceae	Sporosarcina	Sporosarcina newyorkensis
GCA_000224065.2_ASM22406v1_genomic.fna	gtdb	Proteobacteria	Gammaproteobacteria	Chromatiales	Chromatiaceae	Thiorhodococcus	Thiorhodococcus drewsii
GCA_000247625.2_ASM24762v2_genomic.fna	gtdb	Proteobacteria	Alphaproteobacteria	Rickettsiales	Rickettsiaceae	Rickettsia	Rickettsia sibirica
GCA_000264075.1_ASM26407v1_genomic.fna	gtdb	Proteobacteria	Gammaproteobacteria	Enterobacterales	Pectobacteriaceae	Dickeya	Dickeya zeae
GCA_000255735.1_ASM25573v1_genomic.fna	gtdb	Proteobacteria	Gammaproteobacteria	Enterobacterales	Yersiniaceae	Yersinia	Yersinia pestis
GCA_000255795.1_ASM25579v1_genomic.fna	gtdb	Proteobacteria	Gammaproteobacteria	Enterobacterales	Yersiniaceae	Yersinia	Yersinia pestis
GCA_000192945.2_ASM19294v2_genomic.fna	gtdb	Proteobacteria	Gammaproteobacteria	Pseudomonadales	Moraxellaceae	Moraxella	Moraxella catarrhalis
GCA_000268505.1_ASM26850v1_genomic.fna	gtdb	Proteobacteria	Gammaproteobacteria	Enterobacterales	Yersiniaceae	Yersinia	Yersinia pestis
GCA_000217895.2_ASM21789v2_genomic.fna	gtdb	Proteobacteria	Gammaproteobacteria	Enterobacterales	Enterobacteriaceae	Shigella	Shigella flexneri
GCA_000240765.1_BifAniBS01_1.0_genomic.fna	gtdb	Actinobacteria	Actinobacteria	Bifidobacteriales	Bifidobacteriaceae	Bifidobacterium	Bifidobacterium animalis
GCA_000258175.1_ASM25817v1_genomic.fna	gtdb	Actinobacteria	Actinobacteria	Pseudonocardiales	Pseudonocardiaceae	Saccharomonospora	Saccharomonospora xinjiangensis
GCA_000255475.1_ASM25547v1_genomic.fna	gtdb	Firmicutes	Clostridia	Clostridiales	Clostridiaceae	Clostridium	Clostridium perfringens
GCA_000236165.1_ASM23616v1_genomic.fna	gtdb	Proteobacteria	Gammaproteobacteria	Legionellales	Legionellaceae	Fluoribacter	Fluoribacter dumoffii
GCA_000269205.1_ASM26920v1_genomic.fna	gtdb	Proteobacteria	Gammaproteobacteria	Enterobacterales	Yersiniaceae	Yersinia	Yersinia pestis
GCA_000262245.1_ASM26224v1_genomic.fna	gtdb	Proteobacteria	Gammaproteobacteria	Pasteurellales	Pasteurellaceae	Pasteurella	Pasteurella bettyae
GCA_000190695.1_ASM19069v1_genomic.fna	gtdb	Proteobacteria	Betaproteobacteria	Neisseriales	Neisseriaceae	Kingella	Kingella denitrificans
GCA_000183545.3_ASM18354v3_genomic.fna	gtdb	Firmicutes	Clostridia	Clostridiales	Clostridiales Family XVII. Incertae Sedis	Thermaerobacter	Thermaerobacter subterraneus
GCA_000223115.2_ASM22311v2_genomic.fna	gtdb	Proteobacteria	Betaproteobacteria	Burkholderiales	Burkholderiaceae	Ralstonia	Ralstonia solanacearum
GCA_000244895.1_ASM24489v1_genomic.fna	gtdb	Firmicutes	Clostridia	Clostridiales	Peptococcaceae	Desulfosporosinus	Desulfosporosinus youngiae
GCA_000226815.3_AaSCC1398v2.0_genomic.fna	gtdb	Proteobacteria	Gammaproteobacteria	Pasteurellales	Pasteurellaceae	Aggregatibacter	Aggregatibacter actinomycetemcomitans
GCA_000242615.3_ASM24261v3_genomic.fna	gtdb	Acidobacteria	Holophagae	Holophagales	Holophagaceae	Holophaga	Holophaga foetida
GCA_000210375.1_ASM21037v1_genomic.fna	gtdb	Cyanobacteria	NA	Oscillatoriales	Microcoleaceae	Arthrospira	Arthrospira platensis
GCA_000261545.1_15354_genomic.fna	gtdb	Proteobacteria	Alphaproteobacteria	Rhizobiales	Bradyrhizobiaceae	Bradyrhizobium	Bradyrhizobium japonicum
GCA_000213555.1_Dysg_gade_ATCC_V1_genomic.fna	gtdb	Bacteroidetes	Bacteroidia	Bacteroidales	Dysgonamonadaceae	Dysgonomonas	Dysgonomonas gadei
GCA_000246945.2_ASM24694v2_genomic.fna	gtdb	Bacteroidetes	Flavobacteriia	Flavobacteriales	Flavobacteriaceae	Myroides	Myroides injenensis
GCA_000245955.1_Bruc_abor_bv1_NI021_V1_genomic.fna	gtdb	Proteobacteria	Alphaproteobacteria	Rhizobiales	Brucellaceae	Brucella	Brucella abortus
GCA_000243175.1_Clos_perf_WAL_14572_V2_genomic.fna	gtdb	Firmicutes	Clostridia	Clostridiales	Clostridiaceae	Clostridium	Clostridium perfringens
GCA_000214275.3_ASM21427v3_genomic.fna	gtdb	Proteobacteria	Gammaproteobacteria	Methylococcales	Methylococcaceae	Methylomicrobium	Methylomicrobium album
GCA_000241265.2_ASM24126v2_genomic.fna	gtdb	Actinobacteria	Actinobacteria	Corynebacteriales	Gordoniaceae	Gordonia	Gordonia araii
GCA_000213575.1_Dysg_moss_DSM_V1_genomic.fna	gtdb	Bacteroidetes	Bacteroidia	Bacteroidales	Dysgonamonadaceae	Dysgonomonas	Dysgonomonas mossii
GCA_000264355.1_Rh24678_genomic.fna	gtdb	Proteobacteria	Gammaproteobacteria	Xanthomonadales	Rhodanobacteraceae	Rhodanobacter	Rhodanobacter denitrificans
GCA_000261505.1_05737_genomic.fna	gtdb	Proteobacteria	Alphaproteobacteria	Rhizobiales	Bradyrhizobiaceae	Bradyrhizobium	Bradyrhizobium elkanii
GCA_000264315.1_Rh18449_genomic.fna	gtdb	Proteobacteria	Gammaproteobacteria	Xanthomonadales	Rhodanobacteraceae	Rhodanobacter	Rhodanobacter fulvus
GCA_000234115.1_Prevotella_sp_F0323_V1_genomic.fna	gtdb	Bacteroidetes	Bacteroidia	Bacteroidales	Prevotellaceae	Alloprevotella	Alloprevotella rava
GCA_000260675.1_HparaphrohaemolyticusHK411v1.0_genomic.fna	gtdb	Proteobacteria	Gammaproteobacteria	Pasteurellales	Pasteurellaceae	Haemophilus	Haemophilus paraphrohaemolyticus
GCA_000192575.1_NovNit_2.0_genomic.fna	gtdb	Proteobacteria	Alphaproteobacteria	Sphingomonadales	Sphingomonadaceae	Novosphingobium	Novosphingobium nitrogenifigens
GCA_000219665.2_ASM21966v2_genomic.fna	gtdb	Proteobacteria	Alphaproteobacteria	Rhizobiales	Rhizobiaceae	Agrobacterium	Agrobacterium tumefaciens
GCA_000231235.1_Roth_muci_M508_V1_genomic.fna	gtdb	Actinobacteria	Actinobacteria	Micrococcales	Micrococcaceae	Rothia	Rothia mucilaginosa
GCA_000263115.1_Bact_frag_CL07T00C01_V1_genomic.fna	gtdb	Bacteroidetes	Bacteroidia	Bacteroidales	Bacteroidaceae	Bacteroides	Bacteroides fragilis
GCA_000238915.2_ASM23891v2_genomic.fna	gtdb	Actinobacteria	Actinobacteria	Micrococcales	Micrococcaceae	Arthrobacter	Arthrobacter globiformis
GCA_000219415.2_SfreGR64-1.0_genomic.fna	gtdb	Proteobacteria	Alphaproteobacteria	Rhizobiales	Rhizobiaceae	Sinorhizobium	Sinorhizobium fredii
GCA_000213495.2_ASM21349v2_genomic.fna	gtdb	Proteobacteria	Gammaproteobacteria	Enterobacterales	Enterobacteriaceae	Shigella	Shigella flexneri
GCA_000243035.1_Prev_mica_F0438_V1_genomic.fna	gtdb	Bacteroidetes	Bacteroidia	Bacteroidales	Prevotellaceae	Prevotella	Prevotella micans
GCA_000264825.1_ASM26482v1_genomic.fna	gtdb	Proteobacteria	Gammaproteobacteria	Enterobacterales	Hafniaceae	Edwardsiella	Edwardsiella tarda
GCA_000183445.2_ASM18344v1_genomic.fna	gtdb	Firmicutes	Negativicutes	Veillonellales	Veillonellaceae	Dialister	Dialister micraerophilus
GCA_000236515.3_LgarvieTb25_1.0_genomic.fna	gtdb	Firmicutes	Bacilli	Lactobacillales	Streptococcaceae	Lactococcus	Lactococcus garvieae
GCA_000234765.2_ASM23476v1_genomic.fna	gtdb	Actinobacteria	Actinobacteria	Corynebacteriales	Corynebacteriaceae	Corynebacterium	Corynebacterium casei
GCA_000262265.1_ASM26226v1_genomic.fna	gtdb	Proteobacteria	Gammaproteobacteria	Pasteurellales	Pasteurellaceae	Haemophilus	Haemophilus parahaemolyticus
GCA_000205485.2_ASM20548v2_genomic.fna	gtdb	Firmicutes	Bacilli	Lactobacillales	Streptococcaceae	Lactococcus	Lactococcus garvieae
GCA_000268965.1_ASM26896v1_genomic.fna	gtdb	Proteobacteria	Gammaproteobacteria	Enterobacterales	Yersiniaceae	Yersinia	Yersinia pestis
GCA_000245775.1_Mega_funi_YIT_11815_V1_genomic.fna	gtdb	Firmicutes	Negativicutes	Selenomonadales	Selenomonadaceae	Megamonas	Megamonas funiformis
GCA_000261585.1_15618_genomic.fna	gtdb	Proteobacteria	Alphaproteobacteria	Rhizobiales	Bradyrhizobiaceae	Bradyrhizobium	Bradyrhizobium japonicum
GCA_000236785.2_ASM23678v2_genomic.fna	gtdb	Proteobacteria	Betaproteobacteria	Burkholderiales	Alcaligenaceae	Achromobacter	Achromobacter arsenitoxydans
GCA_000241325.2_ASM24132v2_genomic.fna	gtdb	Actinobacteria	Actinobacteria	Corynebacteriales	Gordoniaceae	Gordonia	Gordonia polyisoprenivorans
GCA_000236145.1_ASM23614v1_genomic.fna	gtdb	Proteobacteria	Gammaproteobacteria	Legionellales	Legionellaceae	Fluoribacter	Fluoribacter dumoffii
GCA_000242075.2_Myro_odor_CCUG_10230_V2_genomic.fna	gtdb	Bacteroidetes	Flavobacteriia	Flavobacteriales	Flavobacteriaceae	Myroides	Myroides odoratimimus
GCA_000263535.1_ASM26353v1_genomic.fna	gtdb	Actinobacteria	Actinobacteria	Bifidobacteriales	Bifidobacteriaceae	Gardnerella	Gardnerella vaginalis
GCA_000234135.1_Sele_noxi_F0398_V1_genomic.fna	gtdb	Firmicutes	Negativicutes	Selenomonadales	Selenomonadaceae	Selenomonas	Selenomonas noxia
GCA_000241005.3_AaD17P-2v2.0_genomic.fna	gtdb	Proteobacteria	Gammaproteobacteria	Pasteurellales	Pasteurellaceae	Aggregatibacter	Aggregatibacter actinomycetemcomitans
GCA_000225745.1_Dorea_form_4_6_53AFAA_V1_genomic.fna	gtdb	Firmicutes	Clostridia	Clostridiales	Lachnospiraceae	Dorea	Dorea formicigenerans
GCA_000189395.2_ASM18939v1_genomic.fna	gtdb	Firmicutes	Bacilli	Bacillales	Planococcaceae	Planococcus	Planococcus donghaensis
GCA_000263655.1_ASM26365v1_genomic.fna	gtdb	Actinobacteria	Actinobacteria	Bifidobacteriales	Bifidobacteriaceae	Gardnerella	Gardnerella vaginalis
GCA_000195615.1_ASM19561v1_genomic.fna	gtdb	Bacteroidetes	Bacteroidia	Bacteroidales	Bacteroidaceae	Bacteroides	Bacteroides clarus
GCA_000218485.2_ASM21848v2_genomic.fna	gtdb	Bacteroidetes	Flavobacteriia	Flavobacteriales	Flavobacteriaceae	Aquimarina	Aquimarina agarivorans
GCA_000218645.2_Fusobacterium_sp_21_1A_V3_genomic.fna	gtdb	Fusobacteria	Fusobacteriia	Fusobacteriales	Fusobacteriaceae	Fusobacterium	Fusobacterium nucleatum
GCA_000269285.2_ASM26928v2_genomic.fna	gtdb	Proteobacteria	Gammaproteobacteria	Enterobacterales	Yersiniaceae	Yersinia	Yersinia pestis
GCA_000224695.2_ASM22469v2_genomic.fna	gtdb	Proteobacteria	Alphaproteobacteria	Sphingomonadales	Sphingomonadaceae	Sphingobium	Sphingobium yanoikuyae
GCA_000233735.1_ASM23373v1_genomic.fna	gtdb	Actinobacteria	Actinobacteria	Corynebacteriales	Corynebacteriaceae	Corynebacterium	Corynebacterium pseudotuberculosis
GCA_000263615.1_ASM26361v1_genomic.fna	gtdb	Actinobacteria	Actinobacteria	Bifidobacteriales	Bifidobacteriaceae	Gardnerella	Gardnerella vaginalis
GCA_000239915.2_ASM23991v2_genomic.fna	gtdb	Firmicutes	Bacilli	Lactobacillales	Leuconostocaceae	Leuconostoc	Leuconostoc citreum
GCA_000226715.3_AaH5P-1v2.0_genomic.fna	gtdb	Proteobacteria	Gammaproteobacteria	Pasteurellales	Pasteurellaceae	Aggregatibacter	Aggregatibacter actinomycetemcomitans
GCA_000234055.1_Prev_hist_F0411_V1_genomic.fna	gtdb	Bacteroidetes	Bacteroidia	Bacteroidales	Prevotellaceae	Prevotella	Prevotella histicola
GCA_000220505.2_ASM22050v2_genomic.fna	gtdb	Proteobacteria	Gammaproteobacteria	Cellvibrionales	Microbulbiferaceae	Microbulbifer	Microbulbifer agarilyticus
GCA_000194905.1_ASM19490v1_genomic.fna	gtdb	Actinobacteria	Actinobacteria	Propionibacteriales	Propionibacteriaceae	Cutibacterium	Cutibacterium acnes
GCA_000255575.2_ASM25557v2_genomic.fna	gtdb	Firmicutes	Clostridia	Clostridiales	Hungateiclostridiaceae	Hungateiclostridium	Hungateiclostridium thermocellum
GCA_000243215.1_Odor_lane_YIT_12061_V1_genomic.fna	gtdb	Bacteroidetes	Bacteroidia	Bacteroidales	Odoribacteraceae	Odoribacter	Odoribacter laneus
GCA_000185605.1_ASM18560v1_genomic.fna	gtdb	Bacteroidetes	Bacteroidia	Bacteroidales	Bacteroidaceae	Bacteroides	Bacteroides eggerthii
GCA_000257435.1_RcoIn1.0_genomic.fna	gtdb	Proteobacteria	Alphaproteobacteria	Rickettsiales	Rickettsiaceae	Rickettsia	Rickettsia conorii
GCA_000250815.2_ASM25081v2_genomic.fna	gtdb	Proteobacteria	Alphaproteobacteria	Rhizobiales	Brucellaceae	Brucella	Brucella melitensis
GCA_000230775.2_ASM23077v2_genomic.fna	gtdb	Proteobacteria	Gammaproteobacteria	Enterobacterales	Yersiniaceae	Yersinia	Yersinia enterocolitica
GCA_000243235.1_ASM24323v1_genomic.fna	gtdb	Bacteroidetes	Flavobacteriia	Flavobacteriales	Flavobacteriaceae	Gillisia	Gillisia limnaea
GCA_000209615.2_ASM20961v2_genomic.fna	gtdb	Proteobacteria	Alphaproteobacteria	Rhizobiales	Brucellaceae	Brucella	Brucella melitensis
GCA_000268425.1_ASM26842v1_genomic.fna	gtdb	Proteobacteria	Gammaproteobacteria	Enterobacterales	Yersiniaceae	Yersinia	Yersinia pestis
GCA_000246775.1_ASM24677v1_genomic.fna	gtdb	Spirochaetes	Spirochaetia	Spirochaetales	Spirochaetaceae	Treponema	Treponema pallidum
GCA_000191065.1_ASM19106v1_genomic.fna	gtdb	Bacteroidetes	Bacteroidia	Bacteroidales	Prevotellaceae	Prevotella	Prevotella multiformis
GCA_000183985.1_ASM18398v1_genomic.fna	gtdb	Bacteroidetes	Flavobacteriia	Flavobacteriales	Flavobacteriaceae	Capnocytophaga	Capnocytophaga ochracea
GCA_000212605.1_ASM21260v1_genomic.fna	gtdb	Proteobacteria	Alphaproteobacteria	Rhodobacterales	Rhodobacteraceae	Rhodobacter	Rhodobacter sphaeroides
GCA_000252385.2_ASM25238v2_genomic.fna	gtdb	Actinobacteria	Actinobacteria	Propionibacteriales	Propionibacteriaceae	Cutibacterium	Cutibacterium acnes
GCA_000255855.1_ASM25585v1_genomic.fna	gtdb	Proteobacteria	Gammaproteobacteria	Enterobacterales	Yersiniaceae	Yersinia	Yersinia pestis
GCA_000211115.2_ASM21111v2_genomic.fna	gtdb	Proteobacteria	Gammaproteobacteria	Legionellales	Legionellaceae	Legionella	Legionella pneumophila
GCA_900453165.1_55884_F01_genomic.fna	gtdb	Proteobacteria	Gammaproteobacteria	Enterobacterales	Morganellaceae	Morganella	Morganella morganii
GCA_900461615.1_51765_D01_genomic.fna	gtdb	Firmicutes	Bacilli	Lactobacillales	Leuconostocaceae	Leuconostoc	Leuconostoc mesenteroides
GCA_900478015.1_48269_B01_genomic.fna	gtdb	Firmicutes	Clostridia	Clostridiales	Clostridiaceae	Clostridium	Clostridium perfringens
GCA_900486015.1_18787_4_4_genomic.fna	gtdb	Proteobacteria	Gammaproteobacteria	Enterobacterales	Enterobacteriaceae	Shigella	Shigella flexneri
GCA_900407605.1_PTHi-12851_genomic.fna	gtdb	Proteobacteria	Gammaproteobacteria	Pasteurellales	Pasteurellaceae	Haemophilus	Haemophilus influenzae
GCA_900407685.1_PTHi-13074_genomic.fna	gtdb	Proteobacteria	Gammaproteobacteria	Pasteurellales	Pasteurellaceae	Haemophilus	Haemophilus influenzae
GCA_900455735.1_55312_C01_genomic.fna	gtdb	Actinobacteria	Actinobacteria	Corynebacteriales	Nocardiaceae	Rhodococcus	Rhodococcus wratislaviensis
GCA_900417195.1_01-3016-5171_genomic.fna	gtdb	Proteobacteria	Alphaproteobacteria	Rhizobiales	Brucellaceae	Brucella	Brucella melitensis
GCA_900445155.1_52067_E01_genomic.fna	gtdb	Proteobacteria	Alphaproteobacteria	Rhizobiales	Bradyrhizobiaceae	Afipia	Afipia felis
GCA_900454995.1_52347_B01_genomic.fna	gtdb	Proteobacteria	Gammaproteobacteria	Enterobacterales	Morganellaceae	Proteus	Proteus mirabilis
GCA_900455275.1_53421_C01_genomic.fna	gtdb	Proteobacteria	Gammaproteobacteria	Enterobacterales	Morganellaceae	Proteus	Proteus vulgaris
GCA_900450735.1_49950_E01_genomic.fna	gtdb	Proteobacteria	Gammaproteobacteria	Pasteurellales	Pasteurellaceae	Gallibacterium	Gallibacterium anatis
GCA_900446695.1_48903_C01_genomic.fna	gtdb	Bacteroidetes	Flavobacteriia	Flavobacteriales	Flavobacteriaceae	Capnocytophaga	Capnocytophaga sputigena
GCA_900447475.1_55064_H01_genomic.fna	gtdb	Actinobacteria	Actinobacteria	Corynebacteriales	Corynebacteriaceae	Corynebacterium	Corynebacterium minutissimum
GCA_900455025.1_52313_G01_genomic.fna	gtdb	Proteobacteria	Gammaproteobacteria	Enterobacterales	Morganellaceae	Proteus	Proteus mirabilis
GCA_900485905.1_18787_4_14_genomic.fna	gtdb	Proteobacteria	Gammaproteobacteria	Enterobacterales	Enterobacteriaceae	Shigella	Shigella flexneri
GCA_900486265.1_18787_4_6_genomic.fna	gtdb	Proteobacteria	Gammaproteobacteria	Enterobacterales	Enterobacteriaceae	Shigella	Shigella flexneri
GCA_900485935.1_18787_5_68_genomic.fna	gtdb	Proteobacteria	Gammaproteobacteria	Enterobacterales	Enterobacteriaceae	Shigella	Shigella flexneri
GCA_900486595.1_18787_4_28_genomic.fna	gtdb	Proteobacteria	Gammaproteobacteria	Enterobacterales	Enterobacteriaceae	Shigella	Shigella flexneri
GCA_900456935.1_38109_A02_genomic.fna	gtdb	Proteobacteria	Gammaproteobacteria	Enterobacterales	Yersiniaceae	Serratia	Serratia grimesii
GCA_900452825.1_34347_E01_genomic.fna	gtdb	Proteobacteria	Gammaproteobacteria	Legionellales	Legionellaceae	Legionella	Legionella pneumophila
GCA_900460265.1_50618_C01_genomic.fna	gtdb	Proteobacteria	Gammaproteobacteria	Cardiobacteriales	Cardiobacteriaceae	Suttonella	Suttonella ornithocola
GCA_900447225.1_51726_D01_genomic.fna	gtdb	Proteobacteria	Gammaproteobacteria	Enterobacterales	Hafniaceae	Edwardsiella	Edwardsiella ictaluri
GCA_900455835.1_51699_E01_genomic.fna	gtdb	Proteobacteria	Betaproteobacteria	Burkholderiales	Burkholderiaceae	Ralstonia	Ralstonia pickettii
GCA_900446965.1_45232_F01_genomic.fna	gtdb	Firmicutes	Clostridia	Clostridiales	Peptostreptococcaceae	Clostridioides	Clostridioides difficile
GCA_900486765.1_18787_4_65_genomic.fna	gtdb	Proteobacteria	Gammaproteobacteria	Enterobacterales	Enterobacteriaceae	Shigella	Shigella flexneri
GCA_900454235.1_34576_A02_genomic.fna	gtdb	Proteobacteria	Alphaproteobacteria	Rhizobiales	Brucellaceae	Ochrobactrum	Ochrobactrum anthropi
GCA_900417205.1_00-2956-4_genomic.fna	gtdb	Proteobacteria	Alphaproteobacteria	Rhizobiales	Brucellaceae	Brucella	Brucella melitensis
GCA_900445895.1_57195_A02_genomic.fna	gtdb	Proteobacteria	Alphaproteobacteria	Caulobacterales	Caulobacteraceae	Brevundimonas	Brevundimonas diminuta
GCA_900408185.1_PTHi-9817_genomic.fna	gtdb	Proteobacteria	Gammaproteobacteria	Pasteurellales	Pasteurellaceae	Haemophilus	Haemophilus influenzae
GCA_900460155.1_52700_E01_genomic.fna	gtdb	Actinobacteria	Actinobacteria	Corynebacteriales	Tsukamurellaceae	Tsukamurella	Tsukamurella pulmonis
GCA_900484815.1_19646_6_91_genomic.fna	gtdb	Proteobacteria	Gammaproteobacteria	Enterobacterales	Enterobacteriaceae	Shigella	Shigella flexneri
GCA_900455895.1_49699_C02_genomic.fna	gtdb	Actinobacteria	Actinobacteria	Micrococcales	Micrococcaceae	Rothia	Rothia dentocariosa
GCA_900486725.1_18787_4_61_genomic.fna	gtdb	Proteobacteria	Gammaproteobacteria	Enterobacterales	Enterobacteriaceae	Shigella	Shigella flexneri
GCA_900461535.1_45232_D01_genomic.fna	gtdb	Proteobacteria	Gammaproteobacteria	Legionellales	Legionellaceae	Legionella	Legionella pneumophila
GCA_900408025.1_PTHi-3533_genomic.fna	gtdb	Proteobacteria	Gammaproteobacteria	Pasteurellales	Pasteurellaceae	Haemophilus	Haemophilus influenzae
GCA_900484855.1_19646_6_35_genomic.fna	gtdb	Proteobacteria	Gammaproteobacteria	Enterobacterales	Enterobacteriaceae	Shigella	Shigella sonnei
GCA_900407695.1_PTHi-13476_genomic.fna	gtdb	Proteobacteria	Gammaproteobacteria	Pasteurellales	Pasteurellaceae	Haemophilus	Haemophilus influenzae
GCA_900461175.1_32407_C01_genomic.fna	gtdb	Proteobacteria	Gammaproteobacteria	Enterobacterales	Enterobacteriaceae	Citrobacter	Citrobacter koseri
GCA_900465315.1_PRJEB27024_genomic.fna	gtdb	Proteobacteria	Alphaproteobacteria	Rhodospirillales	Acetobacteraceae	Asaia	Asaia bogorensis
GCA_900444675.1_44257_D01_genomic.fna	gtdb	Proteobacteria	Betaproteobacteria	Burkholderiales	Alcaligenaceae	Achromobacter	Achromobacter denitrificans
GCA_900417215.1_00-4216_genomic.fna	gtdb	Proteobacteria	Alphaproteobacteria	Rhizobiales	Brucellaceae	Brucella	Brucella melitensis
GCA_900451175.1_50465_B02_genomic.fna	gtdb	Proteobacteria	Betaproteobacteria	Neisseriales	Neisseriaceae	Kingella	Kingella potus
GCA_900461055.1_59014_D01_genomic.fna	gtdb	Proteobacteria	Gammaproteobacteria	Enterobacterales	Enterobacteriaceae	Citrobacter	Citrobacter koseri
GCA_900485145.1_19646_6_29_genomic.fna	gtdb	Proteobacteria	Gammaproteobacteria	Enterobacterales	Enterobacteriaceae	Shigella	Shigella sonnei
GCA_900453295.1_53291_H01_genomic.fna	gtdb	Proteobacteria	Gammaproteobacteria	Pasteurellales	Pasteurellaceae	Mannheimia	Mannheimia haemolytica
GCA_900407725.1_PTHi-13399_genomic.fna	gtdb	Proteobacteria	Gammaproteobacteria	Pasteurellales	Pasteurellaceae	Haemophilus	Haemophilus influenzae
GCA_900486965.1_18787_4_88_genomic.fna	gtdb	Proteobacteria	Gammaproteobacteria	Enterobacterales	Enterobacteriaceae	Shigella	Shigella flexneri
GCA_900447675.1_51765_E02_genomic.fna	gtdb	Actinobacteria	Actinobacteria	Corynebacteriales	Corynebacteriaceae	Corynebacterium	Corynebacterium striatum
GCA_900452765.1_45232_B01_genomic.fna	gtdb	Proteobacteria	Gammaproteobacteria	Legionellales	Legionellaceae	Legionella	Legionella pneumophila
GCA_900486075.1_18787_5_83_genomic.fna	gtdb	Proteobacteria	Gammaproteobacteria	Enterobacterales	Enterobacteriaceae	Shigella	Shigella flexneri
GCA_900445545.1_54949_B01_genomic.fna	gtdb	Bacteroidetes	Bacteroidia	Bacteroidales	Bacteroidaceae	Bacteroides	Bacteroides vulgatus
GCA_900407575.1_PTHi-12853_genomic.fna	gtdb	Proteobacteria	Gammaproteobacteria	Pasteurellales	Pasteurellaceae	Haemophilus	Haemophilus influenzae
GCA_900290975.1_CIP109753.1_genomic.fna	gtdb	Bacteroidetes	Flavobacteriia	Flavobacteriales	Flavobacteriaceae	Flavobacterium	Flavobacterium columnare
GCA_900454505.1_53421_A01_genomic.fna	gtdb	Proteobacteria	Gammaproteobacteria	Enterobacterales	Erwiniaceae	Pantoea	Pantoea agglomerans
GCA_900485915.1_18787_5_91_genomic.fna	gtdb	Proteobacteria	Gammaproteobacteria	Enterobacterales	Enterobacteriaceae	Shigella	Shigella flexneri
GCA_900332045.1_Brochothrix_thermosphacta_CD_337_genomic.fna	gtdb	Firmicutes	Bacilli	Bacillales	Listeriaceae	Brochothrix	Brochothrix thermosphacta
GCA_900487055.1_18787_5_63_genomic.fna	gtdb	Proteobacteria	Gammaproteobacteria	Enterobacterales	Enterobacteriaceae	Shigella	Shigella flexneri
GCA_900486415.1_18787_4_56_genomic.fna	gtdb	Proteobacteria	Gammaproteobacteria	Enterobacterales	Enterobacteriaceae	Shigella	Shigella flexneri
GCA_900486485.1_18787_4_50_genomic.fna	gtdb	Proteobacteria	Gammaproteobacteria	Enterobacterales	Enterobacteriaceae	Shigella	Shigella flexneri
GCA_900465345.1_PRJEB27025_genomic.fna	gtdb	Proteobacteria	Alphaproteobacteria	Rhodospirillales	Acetobacteraceae	Asaia	Asaia bogorensis
GCA_900486955.1_18787_5_11_genomic.fna	gtdb	Proteobacteria	Gammaproteobacteria	Enterobacterales	Enterobacteriaceae	Shigella	Shigella flexneri
GCA_900486805.1_18787_5_2_genomic.fna	gtdb	Proteobacteria	Gammaproteobacteria	Enterobacterales	Enterobacteriaceae	Shigella	Shigella flexneri
GCA_900484685.1_19646_6_76_genomic.fna	gtdb	Proteobacteria	Gammaproteobacteria	Enterobacterales	Enterobacteriaceae	Shigella	Shigella flexneri
GCA_900290285.1_PRJEB23933_genomic.fna	gtdb	Firmicutes	Negativicutes	Selenomonadales	Selenomonadaceae	Selenomonas	Selenomonas massiliensis
GCA_900485885.1_18787_5_9_genomic.fna	gtdb	Proteobacteria	Gammaproteobacteria	Enterobacterales	Enterobacteriaceae	Shigella	Shigella flexneri
GCA_900450755.1_46514_C02_genomic.fna	gtdb	Proteobacteria	Gammaproteobacteria	Pasteurellales	Pasteurellaceae	Haemophilus	Haemophilus aegyptius
GCA_900407565.1_PTHi-12613_genomic.fna	gtdb	Proteobacteria	Gammaproteobacteria	Pasteurellales	Pasteurellaceae	Haemophilus	Haemophilus influenzae
GCA_900452955.1_49923_C01_genomic.fna	gtdb	Firmicutes	Bacilli	Lactobacillales	Leuconostocaceae	Leuconostoc	Leuconostoc mesenteroides
GCA_900445525.1_50681_F01_genomic.fna	gtdb	Bacteroidetes	Bacteroidia	Bacteroidales	Tannerellaceae	Parabacteroides	Parabacteroides distasonis
GCA_900487035.1_18787_5_14_genomic.fna	gtdb	Proteobacteria	Gammaproteobacteria	Enterobacterales	Enterobacteriaceae	Shigella	Shigella flexneri
GCA_900486025.1_18787_5_69_genomic.fna	gtdb	Proteobacteria	Gammaproteobacteria	Enterobacterales	Enterobacteriaceae	Shigella	Shigella flexneri
GCA_900460985.1_54042_B01_genomic.fna	gtdb	Proteobacteria	Gammaproteobacteria	Enterobacterales	Enterobacteriaceae	Citrobacter	Citrobacter koseri
GCA_900484765.1_19646_6_21_genomic.fna	gtdb	Proteobacteria	Gammaproteobacteria	Enterobacterales	Enterobacteriaceae	Shigella	Shigella sonnei
GCA_900460495.1_57566_A01_genomic.fna	gtdb	Bacteroidetes	Flavobacteriia	Flavobacteriales	Flavobacteriaceae	Weeksella	Weeksella virosa
GCA_900451035.1_52654_H01_genomic.fna	gtdb	Proteobacteria	Gammaproteobacteria	Enterobacterales	Hafniaceae	Hafnia	Hafnia alvei
GCA_900407965.1_PTHi-2974_genomic.fna	gtdb	Proteobacteria	Gammaproteobacteria	Pasteurellales	Pasteurellaceae	Haemophilus	Haemophilus influenzae
GCA_900485765.1_18787_5_75_genomic.fna	gtdb	Proteobacteria	Gammaproteobacteria	Enterobacterales	Enterobacteriaceae	Shigella	Shigella flexneri
GCA_900446735.1_45889_D01_genomic.fna	gtdb	Proteobacteria	Gammaproteobacteria	Enterobacterales	Enterobacteriaceae	Cedecea	Cedecea davisae
GCA_900485245.1_18787_4_12_genomic.fna	gtdb	Proteobacteria	Gammaproteobacteria	Enterobacterales	Enterobacteriaceae	Shigella	Shigella flexneri
GCA_900408085.1_PTHi-5745_genomic.fna	gtdb	Proteobacteria	Gammaproteobacteria	Pasteurellales	Pasteurellaceae	Haemophilus	Haemophilus influenzae
GCA_900486305.1_18787_4_46_genomic.fna	gtdb	Proteobacteria	Gammaproteobacteria	Enterobacterales	Enterobacteriaceae	Shigella	Shigella flexneri
GCA_900486785.1_18787_4_58_genomic.fna	gtdb	Proteobacteria	Gammaproteobacteria	Enterobacterales	Enterobacteriaceae	Shigella	Shigella flexneri
GCA_900455755.1_52683_E03_genomic.fna	gtdb	Bacteroidetes	Bacteroidia	Bacteroidales	Rikenellaceae	Rikenella	Rikenella microfusus
GCA_900407675.1_PTHi-13142_genomic.fna	gtdb	Proteobacteria	Gammaproteobacteria	Pasteurellales	Pasteurellaceae	Haemophilus	Haemophilus influenzae
GCA_900455285.1_56433_E01_genomic.fna	gtdb	Proteobacteria	Gammaproteobacteria	Enterobacterales	Morganellaceae	Providencia	Providencia stuartii
GCA_900485465.1_18787_5_31_genomic.fna	gtdb	Proteobacteria	Gammaproteobacteria	Enterobacterales	Enterobacteriaceae	Shigella	Shigella flexneri
GCA_900486135.1_18787_5_46_genomic.fna	gtdb	Proteobacteria	Gammaproteobacteria	Enterobacterales	Enterobacteriaceae	Shigella	Shigella flexneri
GCA_900486665.1_18787_4_82_genomic.fna	gtdb	Proteobacteria	Gammaproteobacteria	Enterobacterales	Enterobacteriaceae	Shigella	Shigella flexneri
GCA_900445955.1_35377_G01_genomic.fna	gtdb	Spirochaetes	Spirochaetia	Brachyspirales	Brachyspiraceae	Brachyspira	Brachyspira pilosicoli
GCA_900484695.1_19646_6_74_genomic.fna	gtdb	Proteobacteria	Gammaproteobacteria	Enterobacterales	Enterobacteriaceae	Shigella	Shigella flexneri
GCA_900485585.1_18787_5_42_genomic.fna	gtdb	Proteobacteria	Gammaproteobacteria	Enterobacterales	Enterobacteriaceae	Shigella	Shigella flexneri
GCA_900408105.1_PTHi-5308_genomic.fna	gtdb	Proteobacteria	Gammaproteobacteria	Pasteurellales	Pasteurellaceae	Haemophilus	Haemophilus influenzae
GCA_900445265.1_51765_E01_genomic.fna	gtdb	Firmicutes	Tissierellia	Tissierellales	Peptoniphilaceae	Anaerococcus	Anaerococcus octavius
GCA_900446905.1_43721_F02_genomic.fna	gtdb	Proteobacteria	Gammaproteobacteria	Enterobacterales	Enterobacteriaceae	Citrobacter	Citrobacter youngae
GCA_900484315.1_19646_6_64_genomic.fna	gtdb	Proteobacteria	Gammaproteobacteria	Enterobacterales	Enterobacteriaceae	Shigella	Shigella flexneri
GCA_900460645.1_56080_E02_genomic.fna	gtdb	Proteobacteria	Gammaproteobacteria	Enterobacterales	Yersiniaceae	Yersinia	Yersinia pseudotuberculosis
GCA_900484675.1_19646_6_4_genomic.fna	gtdb	Proteobacteria	Gammaproteobacteria	Enterobacterales	Enterobacteriaceae	Shigella	Shigella sonnei
GCA_900454765.1_57530_F01_genomic.fna	gtdb	Bacteroidetes	Bacteroidia	Bacteroidales	Porphyromonadaceae	Porphyromonas	Porphyromonas macacae
GCA_900486165.1_18787_4_20_genomic.fna	gtdb	Proteobacteria	Gammaproteobacteria	Enterobacterales	Enterobacteriaceae	Shigella	Shigella flexneri
GCA_900452285.1_50861_B01_genomic.fna	gtdb	Firmicutes	Bacilli	Bacillales	Planococcaceae	Kurthia	Kurthia zopfii
GCA_900450525.1_59302_E01_genomic.fna	gtdb	Bacteroidetes	Flavobacteriia	Flavobacteriales	Flavobacteriaceae	Flavobacterium	Flavobacterium hibernum
GCA_900460715.1_36725_G02_genomic.fna	gtdb	Proteobacteria	Gammaproteobacteria	Enterobacterales	Yersiniaceae	Yersinia	Yersinia ruckeri
GCA_900455015.1_28265_E01_genomic.fna	gtdb	Proteobacteria	Gammaproteobacteria	Enterobacterales	Morganellaceae	Proteus	Proteus penneri
GCA_900457085.1_56089_E02_genomic.fna	gtdb	Proteobacteria	Gammaproteobacteria	Enterobacterales	Yersiniaceae	Serratia	Serratia proteamaculans
GCA_900485855.1_18787_5_50_genomic.fna	gtdb	Proteobacteria	Gammaproteobacteria	Enterobacterales	Enterobacteriaceae	Shigella	Shigella flexneri
GCA_900486235.1_18787_4_27_genomic.fna	gtdb	Proteobacteria	Gammaproteobacteria	Enterobacterales	Enterobacteriaceae	Shigella	Shigella flexneri
GCA_900456965.1_57675_G01_genomic.fna	gtdb	Proteobacteria	Gammaproteobacteria	Enterobacterales	Yersiniaceae	Serratia	Serratia quinivorans
GCA_900455045.1_58901_A01_genomic.fna	gtdb	Proteobacteria	Gammaproteobacteria	Enterobacterales	Morganellaceae	Proteus	Proteus mirabilis
GCA_900408165.1_PTHi-8273_genomic.fna	gtdb	Proteobacteria	Gammaproteobacteria	Pasteurellales	Pasteurellaceae	Haemophilus	Haemophilus influenzae
GCA_900407805.1_PTHi-1402_genomic.fna	gtdb	Proteobacteria	Gammaproteobacteria	Pasteurellales	Pasteurellaceae	Haemophilus	Haemophilus influenzae
GCA_900453465.1_52579_C01_genomic.fna	gtdb	Actinobacteria	Actinobacteria	Corynebacteriales	Mycobacteriaceae	Mycolicibacterium	Mycolicibacterium smegmatis
GCA_900446865.1_34410_F01_genomic.fna	gtdb	Bacteroidetes	Flavobacteriia	Flavobacteriales	Flavobacteriaceae	Chryseobacterium	Chryseobacterium indoltheticum
GCA_900407585.1_PTHi-12591_genomic.fna	gtdb	Proteobacteria	Gammaproteobacteria	Pasteurellales	Pasteurellaceae	Haemophilus	Haemophilus influenzae
GCA_900445565.1_48853_E02_genomic.fna	gtdb	Bacteroidetes	Bacteroidia	Bacteroidales	Bacteroidaceae	Bacteroides	Bacteroides eggerthii
GCA_900485595.1_18787_5_47_genomic.fna	gtdb	Proteobacteria	Gammaproteobacteria	Enterobacterales	Enterobacteriaceae	Shigella	Shigella flexneri
GCA_900485195.1_19646_6_46_genomic.fna	gtdb	Proteobacteria	Gammaproteobacteria	Enterobacterales	Enterobacteriaceae	Shigella	Shigella sonnei
GCA_900452545.1_53550_A01_genomic.fna	gtdb	Proteobacteria	Gammaproteobacteria	Legionellales	Legionellaceae	Legionella	Legionella gratiana
GCA_900457045.1_44738_B01_genomic.fna	gtdb	Proteobacteria	Gammaproteobacteria	Alteromonadales	Shewanellaceae	Shewanella	Shewanella putrefaciens
GCA_900407415.1_PTHi-12000_genomic.fna	gtdb	Proteobacteria	Gammaproteobacteria	Pasteurellales	Pasteurellaceae	Haemophilus	Haemophilus influenzae
GCA_900455235.1_36672_C01_genomic.fna	gtdb	Proteobacteria	Gammaproteobacteria	Enterobacterales	Morganellaceae	Providencia	Providencia rustigianii
GCA_900302465.1_A.donghaensisCECT8599_Spades_Prokka_genomic.fna	gtdb	Proteobacteria	Alphaproteobacteria	Rhodobacterales	Rhodobacteraceae	Ascidiaceihabitans	Ascidiaceihabitans donghaensis
GCA_900457175.1_57572_A01_genomic.fna	gtdb	Proteobacteria	Gammaproteobacteria	Enterobacterales	Enterobacteriaceae	Shigella	Shigella flexneri
GCA_900407775.1_PTHi-13484_genomic.fna	gtdb	Proteobacteria	Gammaproteobacteria	Pasteurellales	Pasteurellaceae	Haemophilus	Haemophilus influenzae
GCA_900452435.1_54949_D01_genomic.fna	gtdb	Proteobacteria	Gammaproteobacteria	Enterobacterales	Enterobacteriaceae	Leclercia	Leclercia adecarboxylata
GCA_900452305.1_52551_E01_genomic.fna	gtdb	Actinobacteria	Actinobacteria	Micrococcales	Micrococcaceae	Kocuria	Kocuria rosea
GCA_900454815.1_52278_C01_genomic.fna	gtdb	Bacteroidetes	Bacteroidia	Bacteroidales	Porphyromonadaceae	Porphyromonas	Porphyromonas endodontalis
GCA_900417225.1_00-2529-3_genomic.fna	gtdb	Proteobacteria	Alphaproteobacteria	Rhizobiales	Brucellaceae	Brucella	Brucella melitensis
GCA_900446135.1_58116_C01_genomic.fna	gtdb	Proteobacteria	Alphaproteobacteria	Rhizobiales	Brucellaceae	Brucella	Brucella ovis
GCA_900484625.1_19646_6_79_genomic.fna	gtdb	Proteobacteria	Gammaproteobacteria	Enterobacterales	Enterobacteriaceae	Shigella	Shigella flexneri
GCA_900452325.1_52465_C02_genomic.fna	gtdb	Actinobacteria	Actinobacteria	Micrococcales	Micrococcaceae	Kocuria	Kocuria rosea
GCA_900486245.1_18787_4_10_genomic.fna	gtdb	Proteobacteria	Gammaproteobacteria	Enterobacterales	Enterobacteriaceae	Shigella	Shigella flexneri
GCA_900486615.1_18787_4_84_genomic.fna	gtdb	Proteobacteria	Gammaproteobacteria	Enterobacterales	Enterobacteriaceae	Shigella	Shigella flexneri
GCA_900454195.1_57940_B02_genomic.fna	gtdb	Bacteroidetes	Bacteroidia	Bacteroidales	Odoribacteraceae	Odoribacter	Odoribacter splanchnicus
GCA_900302475.1_D.aquaemixtaeCECT8626_Spades_Prokka_genomic.fna	gtdb	Proteobacteria	Alphaproteobacteria	Rhodobacterales	Rhodobacteraceae	Defluviimonas	Defluviimonas aquaemixtae
GCA_900454515.1_33787_D01_genomic.fna	gtdb	Proteobacteria	Gammaproteobacteria	Pasteurellales	Pasteurellaceae	Pasteurella	Pasteurella bettyae
GCA_900447495.1_58901_B01_genomic.fna	gtdb	Proteobacteria	Gammaproteobacteria	Enterobacterales	Enterobacteriaceae	Cronobacter	Cronobacter sakazakii
GCA_900486825.1_18787_5_5_genomic.fna	gtdb	Proteobacteria	Gammaproteobacteria	Enterobacterales	Enterobacteriaceae	Shigella	Shigella flexneri
GCA_900454845.1_50465_C01_genomic.fna	gtdb	Proteobacteria	Gammaproteobacteria	Pasteurellales	Pasteurellaceae	Pasteurella	Pasteurella multocida
GCA_900446845.1_58635_H01_genomic.fna	gtdb	Bacteroidetes	Flavobacteriia	Flavobacteriales	Flavobacteriaceae	Chryseobacterium	Chryseobacterium indoltheticum
GCA_900486935.1_18787_4_86_genomic.fna	gtdb	Proteobacteria	Gammaproteobacteria	Enterobacterales	Enterobacteriaceae	Shigella	Shigella flexneri
GCA_900407815.1_PTHi-1443_genomic.fna	gtdb	Proteobacteria	Gammaproteobacteria	Pasteurellales	Pasteurellaceae	Haemophilus	Haemophilus influenzae
GCA_900485895.1_18787_5_49_genomic.fna	gtdb	Proteobacteria	Gammaproteobacteria	Enterobacterales	Enterobacteriaceae	Shigella	Shigella flexneri
GCA_900291895.1_CF111_genomic.fna	gtdb	Firmicutes	Bacilli	Lactobacillales	Streptococcaceae	Lactococcus	Lactococcus lactis
GCA_900486385.1_18787_4_48_genomic.fna	gtdb	Proteobacteria	Gammaproteobacteria	Enterobacterales	Enterobacteriaceae	Shigella	Shigella flexneri
GCA_900445975.1_35377_H01_genomic.fna	gtdb	Spirochaetes	Spirochaetia	Brachyspirales	Brachyspiraceae	Brachyspira	Brachyspira pilosicoli
GCA_900407865.1_PTHi-1539_genomic.fna	gtdb	Proteobacteria	Gammaproteobacteria	Pasteurellales	Pasteurellaceae	Haemophilus	Haemophilus influenzae
GCA_900485605.1_18787_5_82_genomic.fna	gtdb	Proteobacteria	Gammaproteobacteria	Enterobacterales	Enterobacteriaceae	Shigella	Shigella flexneri
GCA_900485025.1_19536_5_82_genomic.fna	gtdb	Proteobacteria	Gammaproteobacteria	Enterobacterales	Enterobacteriaceae	Shigella	Shigella sonnei
GCA_900486925.1_18787_4_91_genomic.fna	gtdb	Proteobacteria	Gammaproteobacteria	Enterobacterales	Enterobacteriaceae	Shigella	Shigella flexneri
GCA_900445285.1_49888_A01_genomic.fna	gtdb	Firmicutes	Tissierellia	Tissierellales	Peptoniphilaceae	Anaerococcus	Anaerococcus prevotii
GCA_900486185.1_18787_4_17_genomic.fna	gtdb	Proteobacteria	Gammaproteobacteria	Enterobacterales	Enterobacteriaceae	Shigella	Shigella flexneri
GCA_900475545.1_44310_G02_genomic.fna	gtdb	Firmicutes	Clostridia	Clostridiales	Clostridiaceae	Clostridium	Clostridium perfringens
GCA_900446055.1_59014_A01_genomic.fna	gtdb	Proteobacteria	Alphaproteobacteria	Rhizobiales	Brucellaceae	Brucella	Brucella abortus
GCA_900446895.1_53421_D01_genomic.fna	gtdb	Proteobacteria	Gammaproteobacteria	Enterobacterales	Enterobacteriaceae	Citrobacter	Citrobacter koseri
GCA_900485665.1_18787_4_93_genomic.fna	gtdb	Proteobacteria	Gammaproteobacteria	Enterobacterales	Enterobacteriaceae	Shigella	Shigella flexneri
GCA_900485725.1_18787_5_45_genomic.fna	gtdb	Proteobacteria	Gammaproteobacteria	Enterobacterales	Enterobacteriaceae	Shigella	Shigella flexneri
GCA_900484275.1_19646_6_63_genomic.fna	gtdb	Proteobacteria	Gammaproteobacteria	Enterobacterales	Enterobacteriaceae	Shigella	Shigella flexneri
GCA_900445875.1_55312_A01_genomic.fna	gtdb	Actinobacteria	Actinobacteria	Micrococcales	Brevibacteriaceae	Brevibacterium	Brevibacterium iodinum
GCA_900447135.1_52191_G01_genomic.fna	gtdb	Firmicutes	Clostridia	Clostridiales	Clostridiaceae	Clostridium	Clostridium perfringens
GCA_900461255.1_46983_H01_genomic.fna	gtdb	Actinobacteria	Actinobacteria	Corynebacteriales	Corynebacteriaceae	Corynebacterium	Corynebacterium jeikeium
GCA_900454985.1_53750_E01_genomic.fna	gtdb	Bacteroidetes	Bacteroidia	Bacteroidales	Prevotellaceae	Prevotella	Prevotella nigrescens
GCA_900455845.1_47555_D02_genomic.fna	gtdb	Actinobacteria	Actinobacteria	Corynebacteriales	Nocardiaceae	Rhodococcus	Rhodococcus hoagii
GCA_900445025.1_51670_G01_genomic.fna	gtdb	Actinobacteria	Actinobacteria	Actinomycetales	Actinomycetaceae	Schaalia	Schaalia odontolytica
GCA_900454805.1_58635_E02_genomic.fna	gtdb	Proteobacteria	Gammaproteobacteria	Enterobacterales	Budviciaceae	Pragia	Pragia fontium
GCA_900407715.1_PTHi-13351_genomic.fna	gtdb	Proteobacteria	Gammaproteobacteria	Pasteurellales	Pasteurellaceae	Haemophilus	Haemophilus influenzae
GCA_900447075.1_47406_D01_genomic.fna	gtdb	Firmicutes	Clostridia	Clostridiales	Clostridiaceae	Clostridium	Clostridium perfringens
GCA_900446975.1_39111_G02_genomic.fna	gtdb	Proteobacteria	Gammaproteobacteria	Enterobacterales	Enterobacteriaceae	Citrobacter	Citrobacter koseri
GCA_900460345.1_52223_D01_genomic.fna	gtdb	Actinobacteria	Actinobacteria	Actinomycetales	Actinomycetaceae	Trueperella	Trueperella pyogenes
GCA_900484605.1_19646_6_89_genomic.fna	gtdb	Proteobacteria	Gammaproteobacteria	Enterobacterales	Enterobacteriaceae	Shigella	Shigella flexneri
GCA_900485705.1_18787_5_34_genomic.fna	gtdb	Proteobacteria	Gammaproteobacteria	Enterobacterales	Enterobacteriaceae	Shigella	Shigella flexneri
GCA_900455085.1_31530_C01_genomic.fna	gtdb	Proteobacteria	Gammaproteobacteria	Enterobacterales	Morganellaceae	Providencia	Providencia rettgeri
GCA_900447245.1_45753_G01_genomic.fna	gtdb	Actinobacteria	Actinobacteria	Corynebacteriales	Corynebacteriaceae	Corynebacterium	Corynebacterium ulcerans
GCA_900457365.1_35377_B01_genomic.fna	gtdb	Bacteroidetes	Sphingobacteriia	Sphingobacteriales	Sphingobacteriaceae	Sphingobacterium	Sphingobacterium spiritivorum
GCA_900408015.1_PTHi-3511_genomic.fna	gtdb	Proteobacteria	Gammaproteobacteria	Pasteurellales	Pasteurellaceae	Haemophilus	Haemophilus influenzae
GCA_900447055.1_45296_C02_genomic.fna	gtdb	Firmicutes	Clostridia	Clostridiales	Peptostreptococcaceae	Clostridioides	Clostridioides difficile
GCA_900332055.1_Brochothrix_thermosphacta_TAP_175_genomic.fna	gtdb	Firmicutes	Bacilli	Bacillales	Listeriaceae	Brochothrix	Brochothrix thermosphacta
GCA_900450725.1_49595_B01_genomic.fna	gtdb	Proteobacteria	Gammaproteobacteria	Pasteurellales	Pasteurellaceae	Haemophilus	Haemophilus haemoglobinophilus
GCA_900485695.1_18787_5_77_genomic.fna	gtdb	Proteobacteria	Gammaproteobacteria	Enterobacterales	Enterobacteriaceae	Shigella	Shigella flexneri
GCA_900485925.1_18787_5_85_genomic.fna	gtdb	Proteobacteria	Gammaproteobacteria	Enterobacterales	Enterobacteriaceae	Shigella	Shigella flexneri
GCA_900454565.1_58643_B01_genomic.fna	gtdb	Proteobacteria	Gammaproteobacteria	Pasteurellales	Pasteurellaceae	Pasteurella	Pasteurella multocida
GCA_900290445.1_Le_mesenteroides_CECT_9217_Spades_Prokka_genomic.fna	gtdb	Firmicutes	Bacilli	Lactobacillales	Leuconostocaceae	Leuconostoc	Leuconostoc mesenteroides
GCA_900461155.1_51395_F01_genomic.fna	gtdb	Firmicutes	Clostridia	Clostridiales	Clostridiaceae	Clostridium	Clostridium perfringens
GCA_900407595.1_PTHi-12424_genomic.fna	gtdb	Proteobacteria	Gammaproteobacteria	Pasteurellales	Pasteurellaceae	Haemophilus	Haemophilus influenzae
GCA_900485095.1_19646_6_36_genomic.fna	gtdb	Proteobacteria	Gammaproteobacteria	Enterobacterales	Enterobacteriaceae	Shigella	Shigella sonnei
GCA_900485775.1_18787_5_71_genomic.fna	gtdb	Proteobacteria	Gammaproteobacteria	Enterobacterales	Enterobacteriaceae	Shigella	Shigella flexneri
GCA_900484715.1_19646_6_77_genomic.fna	gtdb	Proteobacteria	Gammaproteobacteria	Enterobacterales	Enterobacteriaceae	Shigella	Shigella flexneri
GCA_900453115.1_50450_C01_genomic.fna	gtdb	Proteobacteria	Gammaproteobacteria	Pseudomonadales	Moraxellaceae	Moraxella	Moraxella osloensis
GCA_900407555.1_PTHi-12578_genomic.fna	gtdb	Proteobacteria	Gammaproteobacteria	Pasteurellales	Pasteurellaceae	Haemophilus	Haemophilus influenzae
GCA_900486545.1_18787_4_75_genomic.fna	gtdb	Proteobacteria	Gammaproteobacteria	Enterobacterales	Enterobacteriaceae	Shigella	Shigella flexneri
GCA_900486715.1_18787_4_69_genomic.fna	gtdb	Proteobacteria	Gammaproteobacteria	Enterobacterales	Enterobacteriaceae	Shigella	Shigella flexneri
GCA_900455005.1_50624_A01_genomic.fna	gtdb	Bacteroidetes	Bacteroidia	Bacteroidales	Prevotellaceae	Prevotella	Prevotella intermedia
GCA_900417245.1_00-3099-5734_genomic.fna	gtdb	Proteobacteria	Alphaproteobacteria	Rhizobiales	Brucellaceae	Brucella	Brucella melitensis
GCA_900446945.1_32135_A01_genomic.fna	gtdb	Proteobacteria	Gammaproteobacteria	Enterobacterales	Enterobacteriaceae	Citrobacter	Citrobacter koseri
GCA_900460355.1_51765_C02_genomic.fna	gtdb	Actinobacteria	Actinobacteria	Corynebacteriales	Tsukamurellaceae	Tsukamurella	Tsukamurella paurometabola
GCA_900407915.1_PTHi-3410_genomic.fna	gtdb	Proteobacteria	Gammaproteobacteria	Pasteurellales	Pasteurellaceae	Haemophilus	Haemophilus influenzae
GCA_900452385.1_45813_G02_genomic.fna	gtdb	Proteobacteria	Gammaproteobacteria	Legionellales	Legionellaceae	Legionella	Legionella donaldsonii
GCA_900486575.1_18787_4_54_genomic.fna	gtdb	Proteobacteria	Gammaproteobacteria	Enterobacterales	Enterobacteriaceae	Shigella	Shigella flexneri
GCA_900447535.1_50279_C01_genomic.fna	gtdb	Actinobacteria	Actinobacteria	Micrococcales	Dermacoccaceae	Dermacoccus	Dermacoccus nishinomiyaensis
GCA_900454945.1_57948_F01_genomic.fna	gtdb	Bacteroidetes	Bacteroidia	Bacteroidales	Porphyromonadaceae	Porphyromonas	Porphyromonas cangingivalis
GCA_900447085.1_50377_F01_genomic.fna	gtdb	Firmicutes	Clostridia	Clostridiales	Clostridiaceae	Clostridium	Clostridium perfringens
GCA_900408125.1_PTHi-7714_genomic.fna	gtdb	Proteobacteria	Gammaproteobacteria	Pasteurellales	Pasteurellaceae	Haemophilus	Haemophilus influenzae
GCA_900332065.1_Brochothrix_thermosphacta_BSAS1_3_genomic.fna	gtdb	Firmicutes	Bacilli	Bacillales	Listeriaceae	Brochothrix	Brochothrix thermosphacta
GCA_900460805.1_50377_A01_genomic.fna	gtdb	Proteobacteria	Gammaproteobacteria	Enterobacterales	Enterobacteriaceae	Yokenella	Yokenella regensburgei
GCA_900485215.1_19646_6_18_genomic.fna	gtdb	Proteobacteria	Gammaproteobacteria	Enterobacterales	Enterobacteriaceae	Shigella	Shigella sonnei
GCA_900454665.1_51765_G01_genomic.fna	gtdb	Firmicutes	Tissierellia	Tissierellales	Peptoniphilaceae	Peptoniphilus	Peptoniphilus indolicus
GCA_900484195.1_19646_6_85_genomic.fna	gtdb	Proteobacteria	Gammaproteobacteria	Enterobacterales	Enterobacteriaceae	Shigella	Shigella flexneri
GCA_900461125.1_49699_D02_genomic.fna	gtdb	Firmicutes	Clostridia	Clostridiales	Lachnospiraceae	Blautia	Blautia coccoides
GCA_900407505.1_PTHi-12278_genomic.fna	gtdb	Proteobacteria	Gammaproteobacteria	Pasteurellales	Pasteurellaceae	Haemophilus	Haemophilus influenzae
GCA_900461215.1_58882_G02_genomic.fna	gtdb	Actinobacteria	Actinobacteria	Corynebacteriales	Corynebacteriaceae	Corynebacterium	Corynebacterium diphtheriae
GCA_900447005.1_45296_B02_genomic.fna	gtdb	Firmicutes	Clostridia	Clostridiales	Peptostreptococcaceae	Clostridioides	Clostridioides difficile
GCA_900486835.1_18787_5_10_genomic.fna	gtdb	Proteobacteria	Gammaproteobacteria	Enterobacterales	Enterobacteriaceae	Shigella	Shigella flexneri
GCA_900484555.1_19646_6_87_genomic.fna	gtdb	Proteobacteria	Gammaproteobacteria	Enterobacterales	Enterobacteriaceae	Shigella	Shigella flexneri
GCA_900407425.1_PTHi-11607_genomic.fna	gtdb	Proteobacteria	Gammaproteobacteria	Pasteurellales	Pasteurellaceae	Haemophilus	Haemophilus influenzae
GCA_900312995.1_Kushneria_sp_EAod3_Prokka_genomic.fna	gtdb	Proteobacteria	Gammaproteobacteria	Oceanospirillales	Halomonadaceae	Kushneria	Kushneria phyllosphaerae
GCA_900457155.1_57940_C01_genomic.fna	gtdb	Proteobacteria	Gammaproteobacteria	Enterobacterales	Enterobacteriaceae	Shigella	Shigella sonnei
GCA_900454935.1_57800_C01_genomic.fna	gtdb	Bacteroidetes	Bacteroidia	Bacteroidales	Prevotellaceae	Prevotella	Prevotella pallens
GCA_900486195.1_18787_4_7_genomic.fna	gtdb	Proteobacteria	Gammaproteobacteria	Enterobacterales	Enterobacteriaceae	Shigella	Shigella flexneri
GCA_900302495.1_P.insulaeCECT8812_Spades_Prokka_genomic.fna	gtdb	Proteobacteria	Alphaproteobacteria	Rhodobacterales	Rhodobacteraceae	Pontivivens	Pontivivens insulae
GCA_900486635.1_18787_4_32_genomic.fna	gtdb	Proteobacteria	Gammaproteobacteria	Enterobacterales	Enterobacteriaceae	Shigella	Shigella flexneri
GCA_900447105.1_51395_G01_genomic.fna	gtdb	Firmicutes	Clostridia	Clostridiales	Clostridiaceae	Clostridium	Clostridium perfringens
GCA_900486475.1_18787_4_74_genomic.fna	gtdb	Proteobacteria	Gammaproteobacteria	Enterobacterales	Enterobacteriaceae	Shigella	Shigella flexneri
GCA_900445675.1_57530_G01_genomic.fna	gtdb	Bacteroidetes	Flavobacteriia	Flavobacteriales	Flavobacteriaceae	Bergeyella	Bergeyella zoohelcum
GCA_900460675.1_53550_D01_genomic.fna	gtdb	Proteobacteria	Gammaproteobacteria	Enterobacterales	Yersiniaceae	Yersinia	Yersinia ruckeri
GCA_900486425.1_18787_4_40_genomic.fna	gtdb	Proteobacteria	Gammaproteobacteria	Enterobacterales	Enterobacteriaceae	Shigella	Shigella flexneri
GCA_900452655.1_45813_F02_genomic.fna	gtdb	Proteobacteria	Gammaproteobacteria	Legionellales	Legionellaceae	Legionella	Legionella pneumophila
GCA_900454955.1_53421_G01_genomic.fna	gtdb	Bacteroidetes	Bacteroidia	Bacteroidales	Prevotellaceae	Prevotella	Prevotella disiens
GCA_900290205.1_PRJEB22816_genomic.fna	gtdb	Firmicutes	Clostridia	Clostridiales	Ruminococcaceae	Anaerolactibacter	Anaerolactibacter massiliensis
GCA_900461295.1_48269_C01_genomic.fna	gtdb	Firmicutes	Clostridia	Clostridiales	Clostridiaceae	Clostridium	Clostridium perfringens
GCA_900446955.1_35620_B01_genomic.fna	gtdb	Proteobacteria	Gammaproteobacteria	Enterobacterales	Enterobacteriaceae	Citrobacter	Citrobacter koseri
GCA_900485415.1_18787_5_12_genomic.fna	gtdb	Proteobacteria	Gammaproteobacteria	Enterobacterales	Enterobacteriaceae	Shigella	Shigella flexneri
GCA_900446835.1_53750_D02_genomic.fna	gtdb	Proteobacteria	Gammaproteobacteria	Enterobacterales	Enterobacteriaceae	Citrobacter	Citrobacter freundii
GCA_900291885.1_CF112_genomic.fna	gtdb	Firmicutes	Bacilli	Lactobacillales	Streptococcaceae	Lactococcus	Lactococcus lactis
GCA_900461385.1_52465_H02_genomic.fna	gtdb	Actinobacteria	Actinobacteria	Corynebacteriales	Corynebacteriaceae	Corynebacterium	Corynebacterium amycolatum
GCA_900457065.1_57675_D02_genomic.fna	gtdb	Proteobacteria	Gammaproteobacteria	Alteromonadales	Shewanellaceae	Shewanella	Shewanella putrefaciens
GCA_900322255.1_CIP103579T_genomic.fna	gtdb	Proteobacteria	Betaproteobacteria	Neisseriales	Neisseriaceae	Prolinoborus	Prolinoborus fasciculus
GCA_900485865.1_18787_4_51_genomic.fna	gtdb	Proteobacteria	Gammaproteobacteria	Enterobacterales	Enterobacteriaceae	Shigella	Shigella flexneri
GCA_900452265.1_54949_C01_genomic.fna	gtdb	Proteobacteria	Gammaproteobacteria	Enterobacterales	Enterobacteriaceae	Kluyvera	Kluyvera ascorbata
GCA_900454645.1_33763_F01_genomic.fna	gtdb	Proteobacteria	Gammaproteobacteria	Pasteurellales	Pasteurellaceae	Pasteurella	Pasteurella multocida
GCA_900445495.1_52683_B04_genomic.fna	gtdb	Bacteroidetes	Bacteroidia	Bacteroidales	Tannerellaceae	Parabacteroides	Parabacteroides merdae
[truncated: 28,647 more rows]
