# Supplementary material for: Predicting metabolic modules in incomplete bacterial genomes with MetaPathPredict
Source: eLife. 2024 May 2;13:e85749. doi: 10.7554/eLife.85749 (PMC11065424; doi:10.7554/eLife.85749)
Supplement: Figure 4—source data 1. [file elife-85749-fig4-data1.xlsx]

## Sheet: Figure_4_Source_Data
Module name	Percent of sequence reads retained	Model type	Metric	Score
M00001	0.4	MLP (single layer)	F1	0.8571428571428572
M00001	0.4	MLP (single layer)	Precision	0.8181818181818182
M00001	0.4	MLP (single layer)	Recall	0.9
M00001	0.4	MLP (single layer)	Pos Pred Value	0.8181818181818181
M00001	0.4	MLP (single layer)	Neg Pred Value	0.9565217391304348
M00001	0.7	MLP (single layer)	F1	0.8461538461538461
M00001	0.7	MLP (single layer)	Precision	0.8461538461538461
M00001	0.7	MLP (single layer)	Recall	0.8461538461538461
M00001	0.7	MLP (single layer)	Pos Pred Value	0.8461538461538461
M00001	0.7	MLP (single layer)	Neg Pred Value	0.9310344827586207
M00001	1	MLP (single layer)	F1	0.888889
M00001	1	MLP (single layer)	Precision	0.9230769230769231
M00001	1	MLP (single layer)	Recall	0.8571428571428571
M00001	1	MLP (single layer)	Pos Pred Value	0.9230769230769231
M00001	1	MLP (single layer)	Neg Pred Value	0.935484
M00001	3	MLP (single layer)	F1	0.9285714285714286
M00001	3	MLP (single layer)	Precision	0.9285714285714286
M00001	3	MLP (single layer)	Recall	0.9285714285714286
M00001	3	MLP (single layer)	Pos Pred Value	0.9285714285714285
M00001	3	MLP (single layer)	Neg Pred Value	0.9714285714285714
M00001	5	MLP (single layer)	F1	0.9285714285714286
M00001	5	MLP (single layer)	Precision	0.9285714285714286
M00001	5	MLP (single layer)	Recall	0.9285714285714286
M00001	5	MLP (single layer)	Pos Pred Value	0.9285714285714285
M00001	5	MLP (single layer)	Neg Pred Value	0.9714285714285714
M00001	7	MLP (single layer)	F1	0.9285714285714286
M00001	7	MLP (single layer)	Precision	0.9285714285714286
M00001	7	MLP (single layer)	Recall	0.9285714285714286
M00001	7	MLP (single layer)	Pos Pred Value	0.9285714285714285
M00001	7	MLP (single layer)	Neg Pred Value	0.9714285714285714
M00001	10	MLP (single layer)	F1	0.9285714285714286
M00001	10	MLP (single layer)	Precision	0.9285714285714286
M00001	10	MLP (single layer)	Recall	0.9285714285714286
M00001	10	MLP (single layer)	Pos Pred Value	0.9285714285714285
M00001	10	MLP (single layer)	Neg Pred Value	0.9714285714285714
M00002	0.4	MLP (single layer)	F1	0.8
M00002	0.4	MLP (single layer)	Precision	1
M00002	0.4	MLP (single layer)	Recall	0.6666666666666666
M00002	0.4	MLP (single layer)	Pos Pred Value	1
M00002	0.4	MLP (single layer)	Neg Pred Value	0.28571428571428575
M00002	0.7	MLP (single layer)	F1	0.9142857142857143
M00002	0.7	MLP (single layer)	Precision	1
M00002	0.7	MLP (single layer)	Recall	0.8421052631578947
M00002	0.7	MLP (single layer)	Pos Pred Value	1
M00002	0.7	MLP (single layer)	Neg Pred Value	0.3999999999999999
M00002	1	MLP (single layer)	F1	0.9333333333333333
M00002	1	MLP (single layer)	Precision	1
M00002	1	MLP (single layer)	Recall	0.875
M00002	1	MLP (single layer)	Pos Pred Value	1
M00002	1	MLP (single layer)	Neg Pred Value	0.44444444444444453
M00002	3	MLP (single layer)	F1	0.9887640449438202
M00002	3	MLP (single layer)	Precision	1
M00002	3	MLP (single layer)	Recall	0.9777777777777777
M00002	3	MLP (single layer)	Pos Pred Value	1
M00002	3	MLP (single layer)	Neg Pred Value	0.7999999999999998
M00002	5	MLP (single layer)	F1	1
M00002	5	MLP (single layer)	Precision	1
M00002	5	MLP (single layer)	Recall	1
M00002	5	MLP (single layer)	Pos Pred Value	1
M00002	5	MLP (single layer)	Neg Pred Value	1
M00002	7	MLP (single layer)	F1	1
M00002	7	MLP (single layer)	Precision	1
M00002	7	MLP (single layer)	Recall	1
M00002	7	MLP (single layer)	Pos Pred Value	1
M00002	7	MLP (single layer)	Neg Pred Value	1
M00002	10	MLP (single layer)	F1	1
M00002	10	MLP (single layer)	Precision	1
M00002	10	MLP (single layer)	Recall	1
M00002	10	MLP (single layer)	Pos Pred Value	1
M00002	10	MLP (single layer)	Neg Pred Value	1
M00003	0.4	MLP (single layer)	F1	0.744186
M00003	0.4	MLP (single layer)	Precision	0.8421052631578947
M00003	0.4	MLP (single layer)	Recall	0.6666666666666666
M00003	0.4	MLP (single layer)	Pos Pred Value	0.8421052631578947
M00003	0.4	MLP (single layer)	Neg Pred Value	0.4666666666666666
M00003	0.7	MLP (single layer)	F1	0.7857142857142857
M00003	0.7	MLP (single layer)	Precision	0.9166666666666666
M00003	0.7	MLP (single layer)	Recall	0.6875
M00003	0.7	MLP (single layer)	Pos Pred Value	0.9166666666666665
M00003	0.7	MLP (single layer)	Neg Pred Value	0.44444444444444453
M00003	1	MLP (single layer)	F1	0.9
M00003	1	MLP (single layer)	Precision	1
M00003	1	MLP (single layer)	Recall	0.8181818181818182
M00003	1	MLP (single layer)	Pos Pred Value	1
M00003	1	MLP (single layer)	Neg Pred Value	0.6470588235294118
M00003	3	MLP (single layer)	F1	0.9866666666666666
M00003	3	MLP (single layer)	Precision	1
M00003	3	MLP (single layer)	Recall	0.9736842105263158
M00003	3	MLP (single layer)	Pos Pred Value	1
M00003	3	MLP (single layer)	Neg Pred Value	0.9166666666666669
M00003	5	MLP (single layer)	F1	0.9866666666666666
M00003	5	MLP (single layer)	Precision	1
M00003	5	MLP (single layer)	Recall	0.9736842105263158
M00003	5	MLP (single layer)	Pos Pred Value	1
M00003	5	MLP (single layer)	Neg Pred Value	0.9166666666666669
M00003	7	MLP (single layer)	F1	1
M00003	7	MLP (single layer)	Precision	1
M00003	7	MLP (single layer)	Recall	1
M00003	7	MLP (single layer)	Pos Pred Value	1
M00003	7	MLP (single layer)	Neg Pred Value	1
M00003	10	MLP (single layer)	F1	1
M00003	10	MLP (single layer)	Precision	1
M00003	10	MLP (single layer)	Recall	1
M00003	10	MLP (single layer)	Pos Pred Value	1
M00003	10	MLP (single layer)	Neg Pred Value	1
M00004	0.4	MLP (single layer)	F1	0.6206896551724138
M00004	0.4	MLP (single layer)	Precision	0.9
M00004	0.4	MLP (single layer)	Recall	0.47368421052631576
M00004	0.4	MLP (single layer)	Pos Pred Value	0.9
M00004	0.4	MLP (single layer)	Neg Pred Value	0.5833333333333333
M00004	0.7	MLP (single layer)	F1	0.7272727272727272
M00004	0.7	MLP (single layer)	Precision	0.9411764705882353
M00004	0.7	MLP (single layer)	Recall	0.5925925925925926
M00004	0.7	MLP (single layer)	Pos Pred Value	0.9411764705882354
M00004	0.7	MLP (single layer)	Neg Pred Value	0.5599999999999999
M00004	1	MLP (single layer)	F1	0.7659574468085106
M00004	1	MLP (single layer)	Precision	0.9473684210526315
M00004	1	MLP (single layer)	Recall	0.6428571428571429
M00004	1	MLP (single layer)	Pos Pred Value	0.9473684210526316
M00004	1	MLP (single layer)	Neg Pred Value	0.6000000000000001
M00004	3	MLP (single layer)	F1	0.96875
M00004	3	MLP (single layer)	Precision	0.96875
M00004	3	MLP (single layer)	Recall	0.96875
M00004	3	MLP (single layer)	Pos Pred Value	0.96875
M00004	3	MLP (single layer)	Neg Pred Value	0.9411764705882353
M00004	5	MLP (single layer)	F1	0.9846153846153847
M00004	5	MLP (single layer)	Precision	0.9696969696969697
M00004	5	MLP (single layer)	Recall	1
M00004	5	MLP (single layer)	Pos Pred Value	0.9696969696969696
M00004	5	MLP (single layer)	Neg Pred Value	1
M00004	7	MLP (single layer)	F1	0.96875
M00004	7	MLP (single layer)	Precision	0.96875
M00004	7	MLP (single layer)	Recall	0.96875
M00004	7	MLP (single layer)	Pos Pred Value	0.96875
M00004	7	MLP (single layer)	Neg Pred Value	0.9411764705882353
M00004	10	MLP (single layer)	F1	0.9846153846153847
M00004	10	MLP (single layer)	Precision	0.9696969696969697
M00004	10	MLP (single layer)	Recall	1
M00004	10	MLP (single layer)	Pos Pred Value	0.9696969696969696
M00004	10	MLP (single layer)	Neg Pred Value	1
M00005	0.4	MLP (single layer)	F1	0.9375
M00005	0.4	MLP (single layer)	Precision	1
M00005	0.4	MLP (single layer)	Recall	0.8823529411764706
M00005	0.4	MLP (single layer)	Pos Pred Value	0
M00005	0.4	MLP (single layer)	Neg Pred Value	0
M00005	0.7	MLP (single layer)	F1	1
M00005	0.7	MLP (single layer)	Precision	1
M00005	0.7	MLP (single layer)	Recall	1
M00005	0.7	MLP (single layer)	Pos Pred Value	1
M00005	0.7	MLP (single layer)	Neg Pred Value	1
M00005	1	MLP (single layer)	F1	0.9885057471264368
M00005	1	MLP (single layer)	Precision	1
M00005	1	MLP (single layer)	Recall	0.9772727272727273
M00005	1	MLP (single layer)	Pos Pred Value	0
M00005	1	MLP (single layer)	Neg Pred Value	0
M00005	3	MLP (single layer)	F1	1
M00005	3	MLP (single layer)	Precision	1
M00005	3	MLP (single layer)	Recall	1
M00005	3	MLP (single layer)	Pos Pred Value	1
M00005	3	MLP (single layer)	Neg Pred Value	1
M00005	5	MLP (single layer)	F1	1
M00005	5	MLP (single layer)	Precision	1
M00005	5	MLP (single layer)	Recall	1
M00005	5	MLP (single layer)	Pos Pred Value	1
M00005	5	MLP (single layer)	Neg Pred Value	1
M00005	7	MLP (single layer)	F1	1
M00005	7	MLP (single layer)	Precision	1
M00005	7	MLP (single layer)	Recall	1
M00005	7	MLP (single layer)	Pos Pred Value	1
M00005	7	MLP (single layer)	Neg Pred Value	1
M00005	10	MLP (single layer)	F1	1
M00005	10	MLP (single layer)	Precision	1
M00005	10	MLP (single layer)	Recall	1
M00005	10	MLP (single layer)	Pos Pred Value	1
M00005	10	MLP (single layer)	Neg Pred Value	1
M00006	0.4	MLP (single layer)	F1	0.717949
M00006	0.4	MLP (single layer)	Precision	1
M00006	0.4	MLP (single layer)	Recall	0.56
M00006	0.4	MLP (single layer)	Pos Pred Value	1
M00006	0.4	MLP (single layer)	Neg Pred Value	0.44999999999999996
M00006	0.7	MLP (single layer)	F1	0.8214285714285715
M00006	0.7	MLP (single layer)	Precision	1
M00006	0.7	MLP (single layer)	Recall	0.69697
M00006	0.7	MLP (single layer)	Pos Pred Value	1
M00006	0.7	MLP (single layer)	Neg Pred Value	0.4736842105263159
M00006	1	MLP (single layer)	F1	0.9032258064516129
M00006	1	MLP (single layer)	Precision	1
M00006	1	MLP (single layer)	Recall	0.8235294117647058
M00006	1	MLP (single layer)	Pos Pred Value	1
M00006	1	MLP (single layer)	Neg Pred Value	0.625
M00006	3	MLP (single layer)	F1	0.9866666666666666
M00006	3	MLP (single layer)	Precision	1
M00006	3	MLP (single layer)	Recall	0.9736842105263158
M00006	3	MLP (single layer)	Pos Pred Value	1
M00006	3	MLP (single layer)	Neg Pred Value	0.9166666666666669
M00006	5	MLP (single layer)	F1	1
M00006	5	MLP (single layer)	Precision	1
M00006	5	MLP (single layer)	Recall	1
M00006	5	MLP (single layer)	Pos Pred Value	1
M00006	5	MLP (single layer)	Neg Pred Value	1
M00006	7	MLP (single layer)	F1	1
M00006	7	MLP (single layer)	Precision	1
M00006	7	MLP (single layer)	Recall	1
M00006	7	MLP (single layer)	Pos Pred Value	1
M00006	7	MLP (single layer)	Neg Pred Value	1
M00006	10	MLP (single layer)	F1	1
M00006	10	MLP (single layer)	Precision	1
M00006	10	MLP (single layer)	Recall	1
M00006	10	MLP (single layer)	Pos Pred Value	1
M00006	10	MLP (single layer)	Neg Pred Value	1
M00007	0.4	MLP (single layer)	F1	0.8400000000000001
M00007	0.4	MLP (single layer)	Precision	1
M00007	0.4	MLP (single layer)	Recall	0.7241379310344828
M00007	0.4	MLP (single layer)	Pos Pred Value	1
M00007	0.4	MLP (single layer)	Neg Pred Value	0.3846153846153847
M00007	0.7	MLP (single layer)	F1	0.9577464788732395
M00007	0.7	MLP (single layer)	Precision	1
M00007	0.7	MLP (single layer)	Recall	0.918919
M00007	0.7	MLP (single layer)	Pos Pred Value	1
M00007	0.7	MLP (single layer)	Neg Pred Value	0.6250000000000001
M00007	1	MLP (single layer)	F1	0.9166666666666666
M00007	1	MLP (single layer)	Precision	1
M00007	1	MLP (single layer)	Recall	0.8461538461538461
M00007	1	MLP (single layer)	Pos Pred Value	1
M00007	1	MLP (single layer)	Neg Pred Value	0.4545454545454546
M00007	3	MLP (single layer)	F1	0.9885057471264368
M00007	3	MLP (single layer)	Precision	1
M00007	3	MLP (single layer)	Recall	0.9772727272727273
M00007	3	MLP (single layer)	Pos Pred Value	1
M00007	3	MLP (single layer)	Neg Pred Value	0.8333333333333335
M00007	5	MLP (single layer)	F1	1
M00007	5	MLP (single layer)	Precision	1
M00007	5	MLP (single layer)	Recall	1
M00007	5	MLP (single layer)	Pos Pred Value	1
M00007	5	MLP (single layer)	Neg Pred Value	1
M00007	7	MLP (single layer)	F1	1
M00007	7	MLP (single layer)	Precision	1
M00007	7	MLP (single layer)	Recall	1
M00007	7	MLP (single layer)	Pos Pred Value	1
M00007	7	MLP (single layer)	Neg Pred Value	1
M00007	10	MLP (single layer)	F1	1
M00007	10	MLP (single layer)	Precision	1
M00007	10	MLP (single layer)	Recall	1
M00007	10	MLP (single layer)	Pos Pred Value	1
M00007	10	MLP (single layer)	Neg Pred Value	1
M00008	0.4	MLP (single layer)	F1	0.6666666666666666
M00008	0.4	MLP (single layer)	Precision	1
M00008	0.4	MLP (single layer)	Recall	0.5
M00008	0.4	MLP (single layer)	Pos Pred Value	1
M00008	0.4	MLP (single layer)	Neg Pred Value	0.7857142857142857
M00008	0.7	MLP (single layer)	F1	0.6153846153846153
M00008	0.7	MLP (single layer)	Precision	1
M00008	0.7	MLP (single layer)	Recall	0.4444444444444444
M00008	0.7	MLP (single layer)	Pos Pred Value	1
M00008	0.7	MLP (single layer)	Neg Pred Value	0.7058823529411764
M00008	1	MLP (single layer)	F1	0.8484848484848484
M00008	1	MLP (single layer)	Precision	1
M00008	1	MLP (single layer)	Recall	0.7368421052631579
M00008	1	MLP (single layer)	Pos Pred Value	1
M00008	1	MLP (single layer)	Neg Pred Value	0.8333333333333333
M00008	3	MLP (single layer)	F1	0.9565217391304348
M00008	3	MLP (single layer)	Precision	0.9565217391304348
M00008	3	MLP (single layer)	Recall	0.9565217391304348
M00008	3	MLP (single layer)	Pos Pred Value	0.9565217391304348
M00008	3	MLP (single layer)	Neg Pred Value	0.9615384615384615
M00008	5	MLP (single layer)	F1	0.9787234042553191
M00008	5	MLP (single layer)	Precision	0.9583333333333334
M00008	5	MLP (single layer)	Recall	1
M00008	5	MLP (single layer)	Pos Pred Value	0.9583333333333334
M00008	5	MLP (single layer)	Neg Pred Value	1
M00008	7	MLP (single layer)	F1	0.9787234042553191
M00008	7	MLP (single layer)	Precision	0.9583333333333334
M00008	7	MLP (single layer)	Recall	1
M00008	7	MLP (single layer)	Pos Pred Value	0.9583333333333334
M00008	7	MLP (single layer)	Neg Pred Value	1
M00008	10	MLP (single layer)	F1	0.9787234042553191
M00008	10	MLP (single layer)	Precision	0.9583333333333334
M00008	10	MLP (single layer)	Recall	1
M00008	10	MLP (single layer)	Pos Pred Value	0.9583333333333334
M00008	10	MLP (single layer)	Neg Pred Value	1
M00009	0.4	MLP (single layer)	F1	0.6285714285714286
M00009	0.4	MLP (single layer)	Precision	0.7857142857142857
M00009	0.4	MLP (single layer)	Recall	0.5238095238095238
M00009	0.4	MLP (single layer)	Pos Pred Value	0.7857142857142858
M00009	0.4	MLP (single layer)	Neg Pred Value	0.5
M00009	0.7	MLP (single layer)	F1	0.744186
M00009	0.7	MLP (single layer)	Precision	0.9411764705882353
M00009	0.7	MLP (single layer)	Recall	0.6153846153846154
M00009	0.7	MLP (single layer)	Pos Pred Value	0.9411764705882354
M00009	0.7	MLP (single layer)	Neg Pred Value	0.6000000000000001
M00009	1	MLP (single layer)	F1	0.84
M00009	1	MLP (single layer)	Precision	0.9130434782608695
M00009	1	MLP (single layer)	Recall	0.7777777777777778
M00009	1	MLP (single layer)	Pos Pred Value	0.9130434782608696
M00009	1	MLP (single layer)	Neg Pred Value	0.7142857142857143
M00009	3	MLP (single layer)	F1	0.9508196721311475
M00009	3	MLP (single layer)	Precision	0.90625
M00009	3	MLP (single layer)	Recall	1
M00009	3	MLP (single layer)	Pos Pred Value	0.9062499999999999
M00009	3	MLP (single layer)	Neg Pred Value	1
M00009	5	MLP (single layer)	F1	0.9032258064516129
M00009	5	MLP (single layer)	Precision	0.8484848484848485
M00009	5	MLP (single layer)	Recall	0.9655172413793104
M00009	5	MLP (single layer)	Pos Pred Value	0.8484848484848485
M00009	5	MLP (single layer)	Neg Pred Value	0.9375000000000001
M00009	7	MLP (single layer)	F1	0.9206349206349206
M00009	7	MLP (single layer)	Precision	0.8529411764705882
M00009	7	MLP (single layer)	Recall	1
M00009	7	MLP (single layer)	Pos Pred Value	0.8529411764705882
M00009	7	MLP (single layer)	Neg Pred Value	1
M00009	10	MLP (single layer)	F1	0.9206349206349206
M00009	10	MLP (single layer)	Precision	0.8529411764705882
M00009	10	MLP (single layer)	Recall	1
M00009	10	MLP (single layer)	Pos Pred Value	0.8529411764705882
M00009	10	MLP (single layer)	Neg Pred Value	1
M00010	0.4	MLP (single layer)	F1	0.7317073170731708
M00010	0.4	MLP (single layer)	Precision	0.8333333333333334
M00010	0.4	MLP (single layer)	Recall	0.6521739130434783
M00010	0.4	MLP (single layer)	Pos Pred Value	0.8333333333333334
M00010	0.4	MLP (single layer)	Neg Pred Value	0.49999999999999994
M00010	0.7	MLP (single layer)	F1	0.830189
M00010	0.7	MLP (single layer)	Precision	0.9166666666666666
M00010	0.7	MLP (single layer)	Recall	0.7586206896551724
M00010	0.7	MLP (single layer)	Pos Pred Value	0.9166666666666665
M00010	0.7	MLP (single layer)	Neg Pred Value	0.611111
M00010	1	MLP (single layer)	F1	0.8620689655172413
M00010	1	MLP (single layer)	Precision	0.8928571428571429
M00010	1	MLP (single layer)	Recall	0.8333333333333334
M00010	1	MLP (single layer)	Pos Pred Value	0.8928571428571428
M00010	1	MLP (single layer)	Neg Pred Value	0.6875000000000001
M00010	3	MLP (single layer)	F1	0.9722222222222222
M00010	3	MLP (single layer)	Precision	0.9459459459459459
M00010	3	MLP (single layer)	Recall	1
M00010	3	MLP (single layer)	Pos Pred Value	0.9459459459459459
M00010	3	MLP (single layer)	Neg Pred Value	1
M00010	5	MLP (single layer)	F1	0.958904
M00010	5	MLP (single layer)	Precision	0.9210526315789473
M00010	5	MLP (single layer)	Recall	1
M00010	5	MLP (single layer)	Pos Pred Value	0.9210526315789475
M00010	5	MLP (single layer)	Neg Pred Value	1
M00010	7	MLP (single layer)	F1	0.9722222222222222
M00010	7	MLP (single layer)	Precision	0.9459459459459459
M00010	7	MLP (single layer)	Recall	1
M00010	7	MLP (single layer)	Pos Pred Value	0.9459459459459459
M00010	7	MLP (single layer)	Neg Pred Value	1
M00010	10	MLP (single layer)	F1	0.9722222222222222
M00010	10	MLP (single layer)	Precision	0.9459459459459459
M00010	10	MLP (single layer)	Recall	1
M00010	10	MLP (single layer)	Pos Pred Value	0.9459459459459459
M00010	10	MLP (single layer)	Neg Pred Value	1
M00011	0.4	MLP (single layer)	F1	0.8571428571428572
M00011	0.4	MLP (single layer)	Precision	0.9545454545454546
M00011	0.4	MLP (single layer)	Recall	0.7777777777777778
M00011	0.4	MLP (single layer)	Pos Pred Value	0.9545454545454546
M00011	0.4	MLP (single layer)	Neg Pred Value	0.5000000000000001
M00011	0.7	MLP (single layer)	F1	0.923077
M00011	0.7	MLP (single layer)	Precision	0.967742
M00011	0.7	MLP (single layer)	Recall	0.8823529411764706
M00011	0.7	MLP (single layer)	Pos Pred Value	0.9677419354838709
M00011	0.7	MLP (single layer)	Neg Pred Value	0.6363636363636362
M00011	1	MLP (single layer)	F1	0.9565217391304348
M00011	1	MLP (single layer)	Precision	0.9705882352941176
M00011	1	MLP (single layer)	Recall	0.9428571428571428
M00011	1	MLP (single layer)	Pos Pred Value	0.9705882352941176
M00011	1	MLP (single layer)	Neg Pred Value	0.7999999999999999
M00011	3	MLP (single layer)	F1	0.9736842105263158
M00011	3	MLP (single layer)	Precision	0.9487179487179487
M00011	3	MLP (single layer)	Recall	1
M00011	3	MLP (single layer)	Pos Pred Value	0.9487179487179487
M00011	3	MLP (single layer)	Neg Pred Value	1
M00011	5	MLP (single layer)	F1	0.9487179487179488
M00011	5	MLP (single layer)	Precision	0.9024390243902439
M00011	5	MLP (single layer)	Recall	1
M00011	5	MLP (single layer)	Pos Pred Value	0.9024390243902439
M00011	5	MLP (single layer)	Neg Pred Value	1
M00011	7	MLP (single layer)	F1	0.9736842105263158
M00011	7	MLP (single layer)	Precision	0.9487179487179487
M00011	7	MLP (single layer)	Recall	1
M00011	7	MLP (single layer)	Pos Pred Value	0.9487179487179487
M00011	7	MLP (single layer)	Neg Pred Value	1
M00011	10	MLP (single layer)	F1	0.9736842105263158
M00011	10	MLP (single layer)	Precision	0.9487179487179487
M00011	10	MLP (single layer)	Recall	1
M00011	10	MLP (single layer)	Pos Pred Value	0.9487179487179487
M00011	10	MLP (single layer)	Neg Pred Value	1
M00012	0.4	MLP (single layer)	F1	0.64
M00012	0.4	MLP (single layer)	Precision	0.8
M00012	0.4	MLP (single layer)	Recall	0.5333333333333333
M00012	0.4	MLP (single layer)	Pos Pred Value	0.7999999999999999
M00012	0.4	MLP (single layer)	Neg Pred Value	0.7083333333333334
M00012	0.7	MLP (single layer)	F1	0.7777777777777778
M00012	0.7	MLP (single layer)	Precision	0.7777777777777778
M00012	0.7	MLP (single layer)	Recall	0.7777777777777778
M00012	0.7	MLP (single layer)	Pos Pred Value	0.7777777777777779
M00012	0.7	MLP (single layer)	Neg Pred Value	0.8333333333333334
M00012	1	MLP (single layer)	F1	0.8108108108108109
M00012	1	MLP (single layer)	Precision	0.7894736842105263
M00012	1	MLP (single layer)	Recall	0.8333333333333334
M00012	1	MLP (single layer)	Pos Pred Value	0.7894736842105263
M00012	1	MLP (single layer)	Neg Pred Value	0.88
M00012	3	MLP (single layer)	F1	0.9268292682926829
M00012	3	MLP (single layer)	Precision	0.8636363636363636
M00012	3	MLP (single layer)	Recall	1
M00012	3	MLP (single layer)	Pos Pred Value	0.8636363636363638
M00012	3	MLP (single layer)	Neg Pred Value	1
M00012	5	MLP (single layer)	F1	0.9268292682926829
M00012	5	MLP (single layer)	Precision	0.8636363636363636
M00012	5	MLP (single layer)	Recall	1
M00012	5	MLP (single layer)	Pos Pred Value	0.8636363636363638
M00012	5	MLP (single layer)	Neg Pred Value	1
M00012	7	MLP (single layer)	F1	0.9268292682926829
M00012	7	MLP (single layer)	Precision	0.8636363636363636
M00012	7	MLP (single layer)	Recall	1
M00012	7	MLP (single layer)	Pos Pred Value	0.8636363636363638
M00012	7	MLP (single layer)	Neg Pred Value	1
M00012	10	MLP (single layer)	F1	0.9268292682926829
M00012	10	MLP (single layer)	Precision	0.8636363636363636
M00012	10	MLP (single layer)	Recall	1
M00012	10	MLP (single layer)	Pos Pred Value	0.8636363636363638
M00012	10	MLP (single layer)	Neg Pred Value	1
M00015	0.4	MLP (single layer)	F1	0.6666666666666666
M00015	0.4	MLP (single layer)	Precision	1
M00015	0.4	MLP (single layer)	Recall	0.5
M00015	0.4	MLP (single layer)	Pos Pred Value	1
M00015	0.4	MLP (single layer)	Neg Pred Value	0.21052631578947373
M00015	0.7	MLP (single layer)	F1	0.8064516129032258
M00015	0.7	MLP (single layer)	Precision	1
M00015	0.7	MLP (single layer)	Recall	0.6756756756756757
M00015	0.7	MLP (single layer)	Pos Pred Value	1
M00015	0.7	MLP (single layer)	Neg Pred Value	0.2941176470588236
M00015	1	MLP (single layer)	F1	0.8181818181818181
M00015	1	MLP (single layer)	Precision	1
M00015	1	MLP (single layer)	Recall	0.6923076923076923
M00015	1	MLP (single layer)	Pos Pred Value	1
M00015	1	MLP (single layer)	Neg Pred Value	0.29411764705882354
M00015	3	MLP (single layer)	F1	0.9885057471264368
M00015	3	MLP (single layer)	Precision	1
M00015	3	MLP (single layer)	Recall	0.9772727272727273
M00015	3	MLP (single layer)	Pos Pred Value	1
M00015	3	MLP (single layer)	Neg Pred Value	0.8333333333333335
M00015	5	MLP (single layer)	F1	1
M00015	5	MLP (single layer)	Precision	1
M00015	5	MLP (single layer)	Recall	1
M00015	5	MLP (single layer)	Pos Pred Value	1
M00015	5	MLP (single layer)	Neg Pred Value	1
M00015	7	MLP (single layer)	F1	1
M00015	7	MLP (single layer)	Precision	1
M00015	7	MLP (single layer)	Recall	1
M00015	7	MLP (single layer)	Pos Pred Value	1
M00015	7	MLP (single layer)	Neg Pred Value	1
M00015	10	MLP (single layer)	F1	0.9885057471264368
M00015	10	MLP (single layer)	Precision	1
M00015	10	MLP (single layer)	Recall	0.9772727272727273
M00015	10	MLP (single layer)	Pos Pred Value	1
M00015	10	MLP (single layer)	Neg Pred Value	0.8333333333333335
M00016	0.4	MLP (single layer)	F1	0.6
M00016	0.4	MLP (single layer)	Precision	1
M00016	0.4	MLP (single layer)	Recall	0.42857142857142855
M00016	0.4	MLP (single layer)	Pos Pred Value	1
M00016	0.4	MLP (single layer)	Neg Pred Value	0.2727272727272728
M00016	0.7	MLP (single layer)	F1	0.7719298245614035
M00016	0.7	MLP (single layer)	Precision	1
M00016	0.7	MLP (single layer)	Recall	0.6285714285714286
M00016	0.7	MLP (single layer)	Pos Pred Value	1
M00016	0.7	MLP (single layer)	Neg Pred Value	0.3499999999999999
M00016	1	MLP (single layer)	F1	0.8750000000000001
M00016	1	MLP (single layer)	Precision	1
M00016	1	MLP (single layer)	Recall	0.7777777777777778
M00016	1	MLP (single layer)	Pos Pred Value	1
M00016	1	MLP (single layer)	Neg Pred Value	0.49999999999999994
M00016	3	MLP (single layer)	F1	1
M00016	3	MLP (single layer)	Precision	1
M00016	3	MLP (single layer)	Recall	1
M00016	3	MLP (single layer)	Pos Pred Value	1
M00016	3	MLP (single layer)	Neg Pred Value	1
M00016	5	MLP (single layer)	F1	1
M00016	5	MLP (single layer)	Precision	1
M00016	5	MLP (single layer)	Recall	1
M00016	5	MLP (single layer)	Pos Pred Value	1
M00016	5	MLP (single layer)	Neg Pred Value	1
M00016	7	MLP (single layer)	F1	1
M00016	7	MLP (single layer)	Precision	1
M00016	7	MLP (single layer)	Recall	1
M00016	7	MLP (single layer)	Pos Pred Value	1
M00016	7	MLP (single layer)	Neg Pred Value	1
M00016	10	MLP (single layer)	F1	1
M00016	10	MLP (single layer)	Precision	1
M00016	10	MLP (single layer)	Recall	1
M00016	10	MLP (single layer)	Pos Pred Value	1
M00016	10	MLP (single layer)	Neg Pred Value	1
M00017	0.4	MLP (single layer)	F1	0.5333333333333333
M00017	0.4	MLP (single layer)	Precision	1
M00017	0.4	MLP (single layer)	Recall	0.36363636363636365
M00017	0.4	MLP (single layer)	Pos Pred Value	1
M00017	0.4	MLP (single layer)	Neg Pred Value	0.7666666666666666
M00017	0.7	MLP (single layer)	F1	0.6363636363636364
M00017	0.7	MLP (single layer)	Precision	1
M00017	0.7	MLP (single layer)	Recall	0.4666666666666667
M00017	0.7	MLP (single layer)	Pos Pred Value	1
M00017	0.7	MLP (single layer)	Neg Pred Value	0.7714285714285715
M00017	1	MLP (single layer)	F1	0.72
M00017	1	MLP (single layer)	Precision	1
M00017	1	MLP (single layer)	Recall	0.5625
M00017	1	MLP (single layer)	Pos Pred Value	1
M00017	1	MLP (single layer)	Neg Pred Value	0.8
M00017	3	MLP (single layer)	F1	0.9189189189189189
M00017	3	MLP (single layer)	Precision	1
M00017	3	MLP (single layer)	Recall	0.85
M00017	3	MLP (single layer)	Pos Pred Value	1
M00017	3	MLP (single layer)	Neg Pred Value	0.9062499999999999
M00017	5	MLP (single layer)	F1	0.8947368421052632
M00017	5	MLP (single layer)	Precision	0.9444444444444444
M00017	5	MLP (single layer)	Recall	0.85
M00017	5	MLP (single layer)	Pos Pred Value	0.9444444444444445
M00017	5	MLP (single layer)	Neg Pred Value	0.9032258064516128
M00017	7	MLP (single layer)	F1	0.9473684210526316
M00017	7	MLP (single layer)	Precision	1
M00017	7	MLP (single layer)	Recall	0.9
M00017	7	MLP (single layer)	Pos Pred Value	1
M00017	7	MLP (single layer)	Neg Pred Value	0.9354838709677419
M00017	10	MLP (single layer)	F1	0.9189189189189189
M00017	10	MLP (single layer)	Precision	1
M00017	10	MLP (single layer)	Recall	0.85
M00017	10	MLP (single layer)	Pos Pred Value	1
M00017	10	MLP (single layer)	Neg Pred Value	0.9062499999999999
M00018	0.4	MLP (single layer)	F1	0.8
M00018	0.4	MLP (single layer)	Precision	1
M00018	0.4	MLP (single layer)	Recall	0.6666666666666666
M00018	0.4	MLP (single layer)	Pos Pred Value	1
M00018	0.4	MLP (single layer)	Neg Pred Value	0.28571428571428575
M00018	0.7	MLP (single layer)	F1	0.898551
M00018	0.7	MLP (single layer)	Precision	1
M00018	0.7	MLP (single layer)	Recall	0.8157894736842105
M00018	0.7	MLP (single layer)	Pos Pred Value	1
M00018	0.7	MLP (single layer)	Neg Pred Value	0.3636363636363636
M00018	1	MLP (single layer)	F1	0.9014084507042254
M00018	1	MLP (single layer)	Precision	1
M00018	1	MLP (single layer)	Recall	0.8205128205128205
M00018	1	MLP (single layer)	Pos Pred Value	1
M00018	1	MLP (single layer)	Neg Pred Value	0.41666666666666663
M00018	3	MLP (single layer)	F1	0.9767441860465117
M00018	3	MLP (single layer)	Precision	1
M00018	3	MLP (single layer)	Recall	0.9545454545454546
M00018	3	MLP (single layer)	Pos Pred Value	1
M00018	3	MLP (single layer)	Neg Pred Value	0.7142857142857145
M00018	5	MLP (single layer)	F1	0.9885057471264368
M00018	5	MLP (single layer)	Precision	1
M00018	5	MLP (single layer)	Recall	0.9772727272727273
M00018	5	MLP (single layer)	Pos Pred Value	1
M00018	5	MLP (single layer)	Neg Pred Value	0.8333333333333335
M00018	7	MLP (single layer)	F1	0.9885057471264368
M00018	7	MLP (single layer)	Precision	1
M00018	7	MLP (single layer)	Recall	0.9772727272727273
M00018	7	MLP (single layer)	Pos Pred Value	1
M00018	7	MLP (single layer)	Neg Pred Value	0.8333333333333335
M00018	10	MLP (single layer)	F1	0.9885057471264368
M00018	10	MLP (single layer)	Precision	1
M00018	10	MLP (single layer)	Recall	0.9772727272727273
M00018	10	MLP (single layer)	Pos Pred Value	1
M00018	10	MLP (single layer)	Neg Pred Value	0.8333333333333335
M00019	0.4	MLP (single layer)	F1	0.8148148148148148
M00019	0.4	MLP (single layer)	Precision	1
M00019	0.4	MLP (single layer)	Recall	0.6875
M00019	0.4	MLP (single layer)	Pos Pred Value	1
M00019	0.4	MLP (single layer)	Neg Pred Value	0.16666666666666669
M00019	0.7	MLP (single layer)	F1	0.9041095890410958
M00019	0.7	MLP (single layer)	Precision	1
M00019	0.7	MLP (single layer)	Recall	0.825
M00019	0.7	MLP (single layer)	Pos Pred Value	1
M00019	0.7	MLP (single layer)	Neg Pred Value	0.22222222222222238
M00019	1	MLP (single layer)	F1	0.975
M00019	1	MLP (single layer)	Precision	1
M00019	1	MLP (single layer)	Recall	0.9512195121951219
M00019	1	MLP (single layer)	Pos Pred Value	1
M00019	1	MLP (single layer)	Neg Pred Value	0.6
M00019	3	MLP (single layer)	F1	0.989011
M00019	3	MLP (single layer)	Precision	0.9782608695652174
M00019	3	MLP (single layer)	Recall	1
M00019	3	MLP (single layer)	Pos Pred Value	0.9782608695652174
M00019	3	MLP (single layer)	Neg Pred Value	1
M00019	5	MLP (single layer)	F1	0.9777777777777777
M00019	5	MLP (single layer)	Precision	0.9777777777777777
M00019	5	MLP (single layer)	Recall	0.9777777777777777
M00019	5	MLP (single layer)	Pos Pred Value	0.9777777777777777
M00019	5	MLP (single layer)	Neg Pred Value	0.7499999999999998
M00019	7	MLP (single layer)	F1	0.9777777777777777
M00019	7	MLP (single layer)	Precision	0.9777777777777777
M00019	7	MLP (single layer)	Recall	0.9777777777777777
M00019	7	MLP (single layer)	Pos Pred Value	0.9777777777777777
M00019	7	MLP (single layer)	Neg Pred Value	0.7499999999999998
M00019	10	MLP (single layer)	F1	0.989011
M00019	10	MLP (single layer)	Precision	0.9782608695652174
M00019	10	MLP (single layer)	Recall	1
M00019	10	MLP (single layer)	Pos Pred Value	0.9782608695652174
M00019	10	MLP (single layer)	Neg Pred Value	1
M00020	0.4	MLP (single layer)	F1	0.7317073170731707
M00020	0.4	MLP (single layer)	Precision	0.9375
M00020	0.4	MLP (single layer)	Recall	0.6
M00020	0.4	MLP (single layer)	Pos Pred Value	0.9375
M00020	0.4	MLP (single layer)	Neg Pred Value	0.4444444444444444
M00020	0.7	MLP (single layer)	F1	0.8363636363636364
M00020	0.7	MLP (single layer)	Precision	0.9583333333333334
M00020	0.7	MLP (single layer)	Recall	0.7419354838709677
M00020	0.7	MLP (single layer)	Pos Pred Value	0.9583333333333333
M00020	0.7	MLP (single layer)	Neg Pred Value	0.5555555555555555
M00020	1	MLP (single layer)	F1	0.9152542372881356
M00020	1	MLP (single layer)	Precision	1
M00020	1	MLP (single layer)	Recall	0.84375
M00020	1	MLP (single layer)	Pos Pred Value	1
M00020	1	MLP (single layer)	Neg Pred Value	0.7058823529411764
M00020	3	MLP (single layer)	F1	0.9577464788732395
M00020	3	MLP (single layer)	Precision	1
M00020	3	MLP (single layer)	Recall	0.918919
M00020	3	MLP (single layer)	Pos Pred Value	1
M00020	3	MLP (single layer)	Neg Pred Value	0.8000000000000002
M00020	5	MLP (single layer)	F1	0.9866666666666666
M00020	5	MLP (single layer)	Precision	0.9736842105263158
M00020	5	MLP (single layer)	Recall	1
M00020	5	MLP (single layer)	Pos Pred Value	0.9736842105263157
M00020	5	MLP (single layer)	Neg Pred Value	1
M00020	7	MLP (single layer)	F1	0.9866666666666666
M00020	7	MLP (single layer)	Precision	0.9736842105263158
M00020	7	MLP (single layer)	Recall	1
M00020	7	MLP (single layer)	Pos Pred Value	0.9736842105263157
M00020	7	MLP (single layer)	Neg Pred Value	1
M00020	10	MLP (single layer)	F1	0.9866666666666666
M00020	10	MLP (single layer)	Precision	0.9736842105263158
M00020	10	MLP (single layer)	Recall	1
M00020	10	MLP (single layer)	Pos Pred Value	0.9736842105263157
M00020	10	MLP (single layer)	Neg Pred Value	1
M00021	0.4	MLP (single layer)	F1	0.6206896551724138
M00021	0.4	MLP (single layer)	Precision	1
M00021	0.4	MLP (single layer)	Recall	0.45
M00021	0.4	MLP (single layer)	Pos Pred Value	1
M00021	0.4	MLP (single layer)	Neg Pred Value	0.5599999999999999
M00021	0.7	MLP (single layer)	F1	0.7000000000000001
M00021	0.7	MLP (single layer)	Precision	1
M00021	0.7	MLP (single layer)	Recall	0.5384615384615384
M00021	0.7	MLP (single layer)	Pos Pred Value	1
M00021	0.7	MLP (single layer)	Neg Pred Value	0.5714285714285713
M00021	1	MLP (single layer)	F1	0.782609
M00021	1	MLP (single layer)	Precision	1
M00021	1	MLP (single layer)	Recall	0.6428571428571429
M00021	1	MLP (single layer)	Pos Pred Value	1
M00021	1	MLP (single layer)	Neg Pred Value	0.6153846153846155
M00021	3	MLP (single layer)	F1	0.9508196721311475
M00021	3	MLP (single layer)	Precision	1
M00021	3	MLP (single layer)	Recall	0.90625
M00021	3	MLP (single layer)	Pos Pred Value	1
M00021	3	MLP (single layer)	Neg Pred Value	0.85
M00021	5	MLP (single layer)	F1	0.9841269841269841
M00021	5	MLP (single layer)	Precision	1
M00021	5	MLP (single layer)	Recall	0.96875
M00021	5	MLP (single layer)	Pos Pred Value	1
M00021	5	MLP (single layer)	Neg Pred Value	0.9444444444444444
M00021	7	MLP (single layer)	F1	0.9841269841269841
M00021	7	MLP (single layer)	Precision	1
M00021	7	MLP (single layer)	Recall	0.96875
M00021	7	MLP (single layer)	Pos Pred Value	1
M00021	7	MLP (single layer)	Neg Pred Value	0.9444444444444444
M00021	10	MLP (single layer)	F1	0.9841269841269841
M00021	10	MLP (single layer)	Precision	1
M00021	10	MLP (single layer)	Recall	0.96875
M00021	10	MLP (single layer)	Pos Pred Value	1
M00021	10	MLP (single layer)	Neg Pred Value	0.9444444444444444
M00022	0.4	MLP (single layer)	F1	0.846154
M00022	0.4	MLP (single layer)	Precision	1
M00022	0.4	MLP (single layer)	Recall	0.7333333333333333
M00022	0.4	MLP (single layer)	Pos Pred Value	1
M00022	0.4	MLP (single layer)	Neg Pred Value	0.3333333333333333
M00022	0.7	MLP (single layer)	F1	0.8787878787878788
M00022	0.7	MLP (single layer)	Precision	1
M00022	0.7	MLP (single layer)	Recall	0.7837837837837838
M00022	0.7	MLP (single layer)	Pos Pred Value	1
M00022	0.7	MLP (single layer)	Neg Pred Value	0.3846153846153847
M00022	1	MLP (single layer)	F1	0.9014084507042254
M00022	1	MLP (single layer)	Precision	1
M00022	1	MLP (single layer)	Recall	0.8205128205128205
M00022	1	MLP (single layer)	Pos Pred Value	1
M00022	1	MLP (single layer)	Neg Pred Value	0.41666666666666663
M00022	3	MLP (single layer)	F1	0.9767441860465117
M00022	3	MLP (single layer)	Precision	1
M00022	3	MLP (single layer)	Recall	0.9545454545454546
M00022	3	MLP (single layer)	Pos Pred Value	1
M00022	3	MLP (single layer)	Neg Pred Value	0.7142857142857145
M00022	5	MLP (single layer)	F1	0.9885057471264368
M00022	5	MLP (single layer)	Precision	1
M00022	5	MLP (single layer)	Recall	0.9772727272727273
M00022	5	MLP (single layer)	Pos Pred Value	1
M00022	5	MLP (single layer)	Neg Pred Value	0.8333333333333335
M00022	7	MLP (single layer)	F1	0.9885057471264368
M00022	7	MLP (single layer)	Precision	1
M00022	7	MLP (single layer)	Recall	0.9772727272727273
M00022	7	MLP (single layer)	Pos Pred Value	1
M00022	7	MLP (single layer)	Neg Pred Value	0.8333333333333335
M00022	10	MLP (single layer)	F1	0.9885057471264368
M00022	10	MLP (single layer)	Precision	1
M00022	10	MLP (single layer)	Recall	0.9772727272727273
M00022	10	MLP (single layer)	Pos Pred Value	1
M00022	10	MLP (single layer)	Neg Pred Value	0.8333333333333335
M00023	0.4	MLP (single layer)	F1	0.7727272727272727
M00023	0.4	MLP (single layer)	Precision	1
M00023	0.4	MLP (single layer)	Recall	0.6296296296296297
M00023	0.4	MLP (single layer)	Pos Pred Value	1
M00023	0.4	MLP (single layer)	Neg Pred Value	0.41176470588235303
M00023	0.7	MLP (single layer)	F1	0.8524590163934427
M00023	0.7	MLP (single layer)	Precision	1
M00023	0.7	MLP (single layer)	Recall	0.7428571428571429
M00023	0.7	MLP (single layer)	Pos Pred Value	1
M00023	0.7	MLP (single layer)	Neg Pred Value	0.43749999999999994
M00023	1	MLP (single layer)	F1	0.8923076923076924
M00023	1	MLP (single layer)	Precision	1
M00023	1	MLP (single layer)	Recall	0.8055555555555556
M00023	1	MLP (single layer)	Pos Pred Value	1
M00023	1	MLP (single layer)	Neg Pred Value	0.5333333333333333
M00023	3	MLP (single layer)	F1	1
M00023	3	MLP (single layer)	Precision	1
M00023	3	MLP (single layer)	Recall	1
M00023	3	MLP (single layer)	Pos Pred Value	1
M00023	3	MLP (single layer)	Neg Pred Value	1
M00023	5	MLP (single layer)	F1	1
M00023	5	MLP (single layer)	Precision	1
M00023	5	MLP (single layer)	Recall	1
M00023	5	MLP (single layer)	Pos Pred Value	1
M00023	5	MLP (single layer)	Neg Pred Value	1
M00023	7	MLP (single layer)	F1	0.9876543209876543
M00023	7	MLP (single layer)	Precision	1
M00023	7	MLP (single layer)	Recall	0.97561
M00023	7	MLP (single layer)	Pos Pred Value	1
M00023	7	MLP (single layer)	Neg Pred Value	0.8888888888888887
M00023	10	MLP (single layer)	F1	0.975
M00023	10	MLP (single layer)	Precision	1
M00023	10	MLP (single layer)	Recall	0.9512195121951219
M00023	10	MLP (single layer)	Pos Pred Value	1
M00023	10	MLP (single layer)	Neg Pred Value	0.7999999999999998
M00024	0.4	MLP (single layer)	F1	0.5714285714285715
M00024	0.4	MLP (single layer)	Precision	1
M00024	0.4	MLP (single layer)	Recall	0.4
M00024	0.4	MLP (single layer)	Pos Pred Value	1
M00024	0.4	MLP (single layer)	Neg Pred Value	0.7999999999999999
M00024	0.7	MLP (single layer)	F1	0.7499999999999999
M00024	0.7	MLP (single layer)	Precision	1
M00024	0.7	MLP (single layer)	Recall	0.6
M00024	0.7	MLP (single layer)	Pos Pred Value	1
M00024	0.7	MLP (single layer)	Neg Pred Value	0.8181818181818181
M00024	1	MLP (single layer)	F1	0.8148148148148148
M00024	1	MLP (single layer)	Precision	1
M00024	1	MLP (single layer)	Recall	0.6875
M00024	1	MLP (single layer)	Pos Pred Value	1
M00024	1	MLP (single layer)	Neg Pred Value	0.8484848484848485
M00024	3	MLP (single layer)	F1	0.9743589743589743
M00024	3	MLP (single layer)	Precision	1
M00024	3	MLP (single layer)	Recall	0.95
M00024	3	MLP (single layer)	Pos Pred Value	1
M00024	3	MLP (single layer)	Neg Pred Value	0.9666666666666667
M00024	5	MLP (single layer)	F1	0.9743589743589743
M00024	5	MLP (single layer)	Precision	1
M00024	5	MLP (single layer)	Recall	0.95
M00024	5	MLP (single layer)	Pos Pred Value	1
M00024	5	MLP (single layer)	Neg Pred Value	0.9666666666666667
M00024	7	MLP (single layer)	F1	0.9743589743589743
M00024	7	MLP (single layer)	Precision	1
M00024	7	MLP (single layer)	Recall	0.95
M00024	7	MLP (single layer)	Pos Pred Value	1
M00024	7	MLP (single layer)	Neg Pred Value	0.9666666666666667
M00024	10	MLP (single layer)	F1	1
M00024	10	MLP (single layer)	Precision	1
M00024	10	MLP (single layer)	Recall	1
M00024	10	MLP (single layer)	Pos Pred Value	1
M00024	10	MLP (single layer)	Neg Pred Value	1
M00025	0.4	MLP (single layer)	F1	0.5454545454545454
M00025	0.4	MLP (single layer)	Precision	0.75
M00025	0.4	MLP (single layer)	Recall	0.42857142857142855
M00025	0.4	MLP (single layer)	Pos Pred Value	0.7499999999999997
M00025	0.4	MLP (single layer)	Neg Pred Value	0.8666666666666667
M00025	0.7	MLP (single layer)	F1	0.5882352941176471
M00025	0.7	MLP (single layer)	Precision	1
M00025	0.7	MLP (single layer)	Recall	0.4166666666666667
M00025	0.7	MLP (single layer)	Pos Pred Value	1
M00025	0.7	MLP (single layer)	Neg Pred Value	0.8108108108108109
M00025	1	MLP (single layer)	F1	0.7000000000000001
M00025	1	MLP (single layer)	Precision	1
M00025	1	MLP (single layer)	Recall	0.5384615384615384
M00025	1	MLP (single layer)	Pos Pred Value	1
M00025	1	MLP (single layer)	Neg Pred Value	0.8378378378378378
M00025	3	MLP (single layer)	F1	1
M00025	3	MLP (single layer)	Precision	1
M00025	3	MLP (single layer)	Recall	1
M00025	3	MLP (single layer)	Pos Pred Value	1
M00025	3	MLP (single layer)	Neg Pred Value	1
M00025	5	MLP (single layer)	F1	0.9375
M00025	5	MLP (single layer)	Precision	1
M00025	5	MLP (single layer)	Recall	0.8823529411764706
M00025	5	MLP (single layer)	Pos Pred Value	1
M00025	5	MLP (single layer)	Neg Pred Value	0.9411764705882353
M00025	7	MLP (single layer)	F1	0.9696969696969697
M00025	7	MLP (single layer)	Precision	1
M00025	7	MLP (single layer)	Recall	0.9411764705882353
M00025	7	MLP (single layer)	Pos Pred Value	1
M00025	7	MLP (single layer)	Neg Pred Value	0.9696969696969696
M00025	10	MLP (single layer)	F1	0.9696969696969697
M00025	10	MLP (single layer)	Precision	1
M00025	10	MLP (single layer)	Recall	0.9411764705882353
M00025	10	MLP (single layer)	Pos Pred Value	1
M00025	10	MLP (single layer)	Neg Pred Value	0.9696969696969696
M00026	0.4	MLP (single layer)	F1	0.5454545454545454
M00026	0.4	MLP (single layer)	Precision	0.6
M00026	0.4	MLP (single layer)	Recall	0.5
M00026	0.4	MLP (single layer)	Pos Pred Value	0.6000000000000001
M00026	0.4	MLP (single layer)	Neg Pred Value	0.896552
M00026	0.7	MLP (single layer)	F1	0.5263157894736842
M00026	0.7	MLP (single layer)	Precision	0.5555555555555556
M00026	0.7	MLP (single layer)	Recall	0.5
M00026	0.7	MLP (single layer)	Pos Pred Value	0.5555555555555556
M00026	0.7	MLP (single layer)	Neg Pred Value	0.8484848484848485
M00026	1	MLP (single layer)	F1	0.7826086956521738
M00026	1	MLP (single layer)	Precision	0.75
M00026	1	MLP (single layer)	Recall	0.8181818181818182
M00026	1	MLP (single layer)	Pos Pred Value	0.75
M00026	1	MLP (single layer)	Neg Pred Value	0.9375
M00026	3	MLP (single layer)	F1	0.8666666666666667
M00026	3	MLP (single layer)	Precision	0.8666666666666667
M00026	3	MLP (single layer)	Recall	0.8666666666666667
M00026	3	MLP (single layer)	Pos Pred Value	0.8666666666666667
M00026	3	MLP (single layer)	Neg Pred Value	0.9411764705882354
M00026	5	MLP (single layer)	F1	0.967742
M00026	5	MLP (single layer)	Precision	0.9375
M00026	5	MLP (single layer)	Recall	1
M00026	5	MLP (single layer)	Pos Pred Value	0.9374999999999999
M00026	5	MLP (single layer)	Neg Pred Value	1
M00026	7	MLP (single layer)	F1	0.967742
M00026	7	MLP (single layer)	Precision	0.9375
M00026	7	MLP (single layer)	Recall	1
M00026	7	MLP (single layer)	Pos Pred Value	0.9374999999999999
M00026	7	MLP (single layer)	Neg Pred Value	1
M00026	10	MLP (single layer)	F1	0.967742
M00026	10	MLP (single layer)	Precision	0.9375
M00026	10	MLP (single layer)	Recall	1
M00026	10	MLP (single layer)	Pos Pred Value	0.9374999999999999
M00026	10	MLP (single layer)	Neg Pred Value	1
M00027	0.4	MLP (single layer)	F1	0
M00027	0.4	MLP (single layer)	Precision	0
M00027	0.4	MLP (single layer)	Recall	0
M00027	0.4	MLP (single layer)	Pos Pred Value	0
M00027	0.4	MLP (single layer)	Neg Pred Value	0.7941176470588236
M00027	0.7	MLP (single layer)	F1	0.4615384615384615
M00027	0.7	MLP (single layer)	Precision	1
M00027	0.7	MLP (single layer)	Recall	0.3
M00027	0.7	MLP (single layer)	Pos Pred Value	1
M00027	0.7	MLP (single layer)	Neg Pred Value	0.8205128205128205
M00027	1	MLP (single layer)	F1	0.6666666666666666
M00027	1	MLP (single layer)	Precision	1
M00027	1	MLP (single layer)	Recall	0.5
M00027	1	MLP (single layer)	Pos Pred Value	1
M00027	1	MLP (single layer)	Neg Pred Value	0.8717948717948718
M00027	3	MLP (single layer)	F1	0.8421052631578948
M00027	3	MLP (single layer)	Precision	1
M00027	3	MLP (single layer)	Recall	0.7272727272727273
M00027	3	MLP (single layer)	Pos Pred Value	1
M00027	3	MLP (single layer)	Neg Pred Value	0.926829
M00027	5	MLP (single layer)	F1	1
M00027	5	MLP (single layer)	Precision	1
M00027	5	MLP (single layer)	Recall	1
M00027	5	MLP (single layer)	Pos Pred Value	1
M00027	5	MLP (single layer)	Neg Pred Value	1
M00027	7	MLP (single layer)	F1	1
M00027	7	MLP (single layer)	Precision	1
M00027	7	MLP (single layer)	Recall	1
M00027	7	MLP (single layer)	Pos Pred Value	1
M00027	7	MLP (single layer)	Neg Pred Value	1
M00027	10	MLP (single layer)	F1	1
M00027	10	MLP (single layer)	Precision	1
M00027	10	MLP (single layer)	Recall	1
M00027	10	MLP (single layer)	Pos Pred Value	1
M00027	10	MLP (single layer)	Neg Pred Value	1
M00028	0.4	MLP (single layer)	F1	0.6
M00028	0.4	MLP (single layer)	Precision	0.9230769230769231
M00028	0.4	MLP (single layer)	Recall	0.4444444444444444
M00028	0.4	MLP (single layer)	Pos Pred Value	0.923077
M00028	0.4	MLP (single layer)	Neg Pred Value	0.28571428571428575
M00028	0.7	MLP (single layer)	F1	0.7719298245614036
M00028	0.7	MLP (single layer)	Precision	0.9565217391304348
M00028	0.7	MLP (single layer)	Recall	0.6470588235294118
M00028	0.7	MLP (single layer)	Pos Pred Value	0.9565217391304347
M00028	0.7	MLP (single layer)	Neg Pred Value	0.368421
M00028	1	MLP (single layer)	F1	0.8387096774193549
M00028	1	MLP (single layer)	Precision	0.9629629629629629
M00028	1	MLP (single layer)	Recall	0.7428571428571429
M00028	1	MLP (single layer)	Pos Pred Value	0.962963
M00028	1	MLP (single layer)	Neg Pred Value	0.47058823529411775
M00028	3	MLP (single layer)	F1	0.9487179487179489
M00028	3	MLP (single layer)	Precision	0.9736842105263158
M00028	3	MLP (single layer)	Recall	0.925
M00028	3	MLP (single layer)	Pos Pred Value	0.9736842105263157
M00028	3	MLP (single layer)	Neg Pred Value	0.7272727272727274
M00028	5	MLP (single layer)	F1	0.975
M00028	5	MLP (single layer)	Precision	0.975
M00028	5	MLP (single layer)	Recall	0.975
M00028	5	MLP (single layer)	Pos Pred Value	0.975
M00028	5	MLP (single layer)	Neg Pred Value	0.8888888888888887
M00028	7	MLP (single layer)	F1	0.975
M00028	7	MLP (single layer)	Precision	0.975
M00028	7	MLP (single layer)	Recall	0.975
M00028	7	MLP (single layer)	Pos Pred Value	0.975
M00028	7	MLP (single layer)	Neg Pred Value	0.8888888888888887
M00028	10	MLP (single layer)	F1	0.9876543209876543
M00028	10	MLP (single layer)	Precision	0.97561
M00028	10	MLP (single layer)	Recall	1
M00028	10	MLP (single layer)	Pos Pred Value	0.97561
M00028	10	MLP (single layer)	Neg Pred Value	1
M00033	0.4	MLP (single layer)	F1	0.46153846153846156
M00033	0.4	MLP (single layer)	Precision	0.3333333333333333
M00033	0.4	MLP (single layer)	Recall	0.75
M00033	0.4	MLP (single layer)	Pos Pred Value	0.33333333333333337
M00033	0.4	MLP (single layer)	Neg Pred Value	0.96
M00033	0.7	MLP (single layer)	F1	0.5555555555555556
M00033	0.7	MLP (single layer)	Precision	0.4166666666666667
M00033	0.7	MLP (single layer)	Recall	0.8333333333333334
M00033	0.7	MLP (single layer)	Pos Pred Value	0.4166666666666667
M00033	0.7	MLP (single layer)	Neg Pred Value	0.9666666666666667
M00033	1	MLP (single layer)	F1	0.8571428571428571
M00033	1	MLP (single layer)	Precision	0.75
M00033	1	MLP (single layer)	Recall	1
M00033	1	MLP (single layer)	Pos Pred Value	0.7499999999999998
M00033	1	MLP (single layer)	Neg Pred Value	1
M00033	3	MLP (single layer)	F1	0.8750000000000001
M00033	3	MLP (single layer)	Precision	0.7777777777777778
M00033	3	MLP (single layer)	Recall	1
M00033	3	MLP (single layer)	Pos Pred Value	0.7777777777777776
M00033	3	MLP (single layer)	Neg Pred Value	1
M00033	5	MLP (single layer)	F1	0.7777777777777778
M00033	5	MLP (single layer)	Precision	0.6363636363636364
M00033	5	MLP (single layer)	Recall	1
M00033	5	MLP (single layer)	Pos Pred Value	0.6363636363636364
M00033	5	MLP (single layer)	Neg Pred Value	1
M00033	7	MLP (single layer)	F1	0.8235294117647058
M00033	7	MLP (single layer)	Precision	0.7
M00033	7	MLP (single layer)	Recall	1
M00033	7	MLP (single layer)	Pos Pred Value	0.7000000000000001
M00033	7	MLP (single layer)	Neg Pred Value	1
M00033	10	MLP (single layer)	F1	0.7777777777777778
M00033	10	MLP (single layer)	Precision	0.6363636363636364
M00033	10	MLP (single layer)	Recall	1
M00033	10	MLP (single layer)	Pos Pred Value	0.6363636363636364
M00033	10	MLP (single layer)	Neg Pred Value	1
M00034	0.4	MLP (single layer)	F1	0.4
M00034	0.4	MLP (single layer)	Precision	1
M00034	0.4	MLP (single layer)	Recall	0.25
M00034	0.4	MLP (single layer)	Pos Pred Value	1
M00034	0.4	MLP (single layer)	Neg Pred Value	0.9090909090909091
M00034	0.7	MLP (single layer)	F1	0.75
M00034	0.7	MLP (single layer)	Precision	0.75
M00034	0.7	MLP (single layer)	Recall	0.75
M00034	0.7	MLP (single layer)	Pos Pred Value	0.7500000000000002
M00034	0.7	MLP (single layer)	Neg Pred Value	0.9736842105263157
M00034	1	MLP (single layer)	F1	0.888889
M00034	1	MLP (single layer)	Precision	1
M00034	1	MLP (single layer)	Recall	0.8
M00034	1	MLP (single layer)	Pos Pred Value	1
M00034	1	MLP (single layer)	Neg Pred Value	0.975
M00034	3	MLP (single layer)	F1	0.7499999999999999
M00034	3	MLP (single layer)	Precision	0.6
M00034	3	MLP (single layer)	Recall	1
M00034	3	MLP (single layer)	Pos Pred Value	0.5999999999999998
M00034	3	MLP (single layer)	Neg Pred Value	1
M00034	5	MLP (single layer)	F1	0.8
M00034	5	MLP (single layer)	Precision	0.6666666666666666
M00034	5	MLP (single layer)	Recall	1
M00034	5	MLP (single layer)	Pos Pred Value	0.6666666666666666
M00034	5	MLP (single layer)	Neg Pred Value	1
M00034	7	MLP (single layer)	F1	0.8
M00034	7	MLP (single layer)	Precision	0.6666666666666666
M00034	7	MLP (single layer)	Recall	1
M00034	7	MLP (single layer)	Pos Pred Value	0.6666666666666666
M00034	7	MLP (single layer)	Neg Pred Value	1
M00034	10	MLP (single layer)	F1	0.8
M00034	10	MLP (single layer)	Precision	0.6666666666666666
M00034	10	MLP (single layer)	Recall	1
M00034	10	MLP (single layer)	Pos Pred Value	0.6666666666666666
M00034	10	MLP (single layer)	Neg Pred Value	1
M00035	0.4	MLP (single layer)	F1	0
M00035	0.4	MLP (single layer)	Precision	0
M00035	0.4	MLP (single layer)	Recall	0
M00035	0.4	MLP (single layer)	Pos Pred Value	0
M00035	0.4	MLP (single layer)	Neg Pred Value	0.9696969696969697
M00035	0.7	MLP (single layer)	F1	0.5714285714285715
M00035	0.7	MLP (single layer)	Precision	0.6666666666666666
M00035	0.7	MLP (single layer)	Recall	0.5
M00035	0.7	MLP (single layer)	Pos Pred Value	0.666667
M00035	0.7	MLP (single layer)	Neg Pred Value	0.9487179487179487
M00035	1	MLP (single layer)	F1	0.4444444444444445
M00035	1	MLP (single layer)	Precision	0.5
M00035	1	MLP (single layer)	Recall	0.4
M00035	1	MLP (single layer)	Pos Pred Value	0.49999999999999983
M00035	1	MLP (single layer)	Neg Pred Value	0.925
M00035	3	MLP (single layer)	F1	0.6666666666666666
M00035	3	MLP (single layer)	Precision	0.5
M00035	3	MLP (single layer)	Recall	1
M00035	3	MLP (single layer)	Pos Pred Value	0.49999999999999994
M00035	3	MLP (single layer)	Neg Pred Value	1
M00035	5	MLP (single layer)	F1	0.6
M00035	5	MLP (single layer)	Precision	0.42857142857142855
M00035	5	MLP (single layer)	Recall	1
M00035	5	MLP (single layer)	Pos Pred Value	0.4285714285714286
M00035	5	MLP (single layer)	Neg Pred Value	1
M00035	7	MLP (single layer)	F1	0.6
M00035	7	MLP (single layer)	Precision	0.42857142857142855
M00035	7	MLP (single layer)	Recall	1
M00035	7	MLP (single layer)	Pos Pred Value	0.4285714285714286
M00035	7	MLP (single layer)	Neg Pred Value	1
M00035	10	MLP (single layer)	F1	0.6
M00035	10	MLP (single layer)	Precision	0.42857142857142855
M00035	10	MLP (single layer)	Recall	1
M00035	10	MLP (single layer)	Pos Pred Value	0.4285714285714286
M00035	10	MLP (single layer)	Neg Pred Value	1
M00036	0.4	MLP (single layer)	F1	0.6666666666666666
M00036	0.4	MLP (single layer)	Precision	0.5
M00036	0.4	MLP (single layer)	Recall	1
M00036	0.4	MLP (single layer)	Pos Pred Value	0.5000000000000002
M00036	0.4	MLP (single layer)	Neg Pred Value	1
M00036	0.7	MLP (single layer)	F1	0.4
M00036	0.7	MLP (single layer)	Precision	0.5
M00036	0.7	MLP (single layer)	Recall	0.3333333333333333
M00036	0.7	MLP (single layer)	Pos Pred Value	0.4999999999999998
M00036	0.7	MLP (single layer)	Neg Pred Value	0.95
M00036	1	MLP (single layer)	F1	0.4
M00036	1	MLP (single layer)	Precision	0.5
M00036	1	MLP (single layer)	Recall	0.3333333333333333
M00036	1	MLP (single layer)	Pos Pred Value	0.4999999999999998
M00036	1	MLP (single layer)	Neg Pred Value	0.9523809523809524
M00036	3	MLP (single layer)	F1	0.7499999999999999
M00036	3	MLP (single layer)	Precision	0.6
M00036	3	MLP (single layer)	Recall	1
M00036	3	MLP (single layer)	Pos Pred Value	0.6000000000000001
M00036	3	MLP (single layer)	Neg Pred Value	1
M00036	5	MLP (single layer)	F1	1
M00036	5	MLP (single layer)	Precision	1
M00036	5	MLP (single layer)	Recall	1
M00036	5	MLP (single layer)	Pos Pred Value	1
M00036	5	MLP (single layer)	Neg Pred Value	1
M00036	7	MLP (single layer)	F1	1
M00036	7	MLP (single layer)	Precision	1
M00036	7	MLP (single layer)	Recall	1
M00036	7	MLP (single layer)	Pos Pred Value	1
M00036	7	MLP (single layer)	Neg Pred Value	1
M00036	10	MLP (single layer)	F1	1
M00036	10	MLP (single layer)	Precision	1
M00036	10	MLP (single layer)	Recall	1
M00036	10	MLP (single layer)	Pos Pred Value	1
M00036	10	MLP (single layer)	Neg Pred Value	1
M00044	0.4	MLP (single layer)	F1	0.47058823529411764
M00044	0.4	MLP (single layer)	Precision	0.8
M00044	0.4	MLP (single layer)	Recall	0.3333333333333333
M00044	0.4	MLP (single layer)	Pos Pred Value	0.8000000000000002
M00044	0.4	MLP (single layer)	Neg Pred Value	0.7241379310344827
M00044	0.7	MLP (single layer)	F1	0.6956521739130435
M00044	0.7	MLP (single layer)	Precision	0.8888888888888888
M00044	0.7	MLP (single layer)	Recall	0.5714285714285714
M00044	0.7	MLP (single layer)	Pos Pred Value	0.8888888888888888
M00044	0.7	MLP (single layer)	Neg Pred Value	0.8181818181818181
M00044	1	MLP (single layer)	F1	0.9285714285714286
M00044	1	MLP (single layer)	Precision	0.9285714285714286
M00044	1	MLP (single layer)	Recall	0.9285714285714286
M00044	1	MLP (single layer)	Pos Pred Value	0.9285714285714286
M00044	1	MLP (single layer)	Neg Pred Value	0.9666666666666667
M00044	3	MLP (single layer)	F1	0.967742
M00044	3	MLP (single layer)	Precision	0.9375
M00044	3	MLP (single layer)	Recall	1
M00044	3	MLP (single layer)	Pos Pred Value	0.9374999999999999
M00044	3	MLP (single layer)	Neg Pred Value	1
M00044	5	MLP (single layer)	F1	0.967742
M00044	5	MLP (single layer)	Precision	0.9375
M00044	5	MLP (single layer)	Recall	1
M00044	5	MLP (single layer)	Pos Pred Value	0.9374999999999999
M00044	5	MLP (single layer)	Neg Pred Value	1
M00044	7	MLP (single layer)	F1	0.967742
M00044	7	MLP (single layer)	Precision	0.9375
M00044	7	MLP (single layer)	Recall	1
M00044	7	MLP (single layer)	Pos Pred Value	0.9374999999999999
M00044	7	MLP (single layer)	Neg Pred Value	1
M00044	10	MLP (single layer)	F1	0.967742
M00044	10	MLP (single layer)	Precision	0.9375
M00044	10	MLP (single layer)	Recall	1
M00044	10	MLP (single layer)	Pos Pred Value	0.9374999999999999
M00044	10	MLP (single layer)	Neg Pred Value	1
M00045	0.4	MLP (single layer)	F1	0.6666666666666666
M00045	0.4	MLP (single layer)	Precision	0.7777777777777778
M00045	0.4	MLP (single layer)	Recall	0.5833333333333334
M00045	0.4	MLP (single layer)	Pos Pred Value	0.7777777777777777
M00045	0.4	MLP (single layer)	Neg Pred Value	0.7999999999999999
M00045	0.7	MLP (single layer)	F1	0.5806451612903226
M00045	0.7	MLP (single layer)	Precision	0.6923076923076923
M00045	0.7	MLP (single layer)	Recall	0.5
M00045	0.7	MLP (single layer)	Pos Pred Value	0.6923076923076924
M00045	0.7	MLP (single layer)	Neg Pred Value	0.689655
M00045	1	MLP (single layer)	F1	0.631579
M00045	1	MLP (single layer)	Precision	0.631579
M00045	1	MLP (single layer)	Recall	0.631579
M00045	1	MLP (single layer)	Pos Pred Value	0.6315789473684211
M00045	1	MLP (single layer)	Neg Pred Value	0.72
M00045	3	MLP (single layer)	F1	0.7916666666666667
M00045	3	MLP (single layer)	Precision	0.76
M00045	3	MLP (single layer)	Recall	0.8260869565217391
M00045	3	MLP (single layer)	Pos Pred Value	0.7600000000000001
M00045	3	MLP (single layer)	Neg Pred Value	0.8333333333333333
M00045	5	MLP (single layer)	F1	0.8800000000000001
M00045	5	MLP (single layer)	Precision	0.8148148148148148
M00045	5	MLP (single layer)	Recall	0.9565217391304348
M00045	5	MLP (single layer)	Pos Pred Value	0.8148148148148149
M00045	5	MLP (single layer)	Neg Pred Value	0.9545454545454546
M00045	7	MLP (single layer)	F1	0.8800000000000001
M00045	7	MLP (single layer)	Precision	0.8148148148148148
M00045	7	MLP (single layer)	Recall	0.9565217391304348
M00045	7	MLP (single layer)	Pos Pred Value	0.8148148148148149
M00045	7	MLP (single layer)	Neg Pred Value	0.9545454545454546
M00045	10	MLP (single layer)	F1	0.8979591836734695
M00045	10	MLP (single layer)	Precision	0.8461538461538461
M00045	10	MLP (single layer)	Recall	0.9565217391304348
M00045	10	MLP (single layer)	Pos Pred Value	0.8461538461538463
M00045	10	MLP (single layer)	Neg Pred Value	0.9565217391304348
M00046	0.4	MLP (single layer)	F1	0
M00046	0.4	MLP (single layer)	Precision	0
M00046	0.4	MLP (single layer)	Recall	0
M00046	0.4	MLP (single layer)	Pos Pred Value	0
M00046	0.4	MLP (single layer)	Neg Pred Value	0.9696969696969697
M00046	0.7	MLP (single layer)	F1	0
M00046	0.7	MLP (single layer)	Precision	0
M00046	0.7	MLP (single layer)	Recall	0
M00046	0.7	MLP (single layer)	Pos Pred Value	0
M00046	0.7	MLP (single layer)	Neg Pred Value	0.9285714285714286
M00046	1	MLP (single layer)	F1	0.5
M00046	1	MLP (single layer)	Precision	1
M00046	1	MLP (single layer)	Recall	0.3333333333333333
M00046	1	MLP (single layer)	Pos Pred Value	1
M00046	1	MLP (single layer)	Neg Pred Value	0.9534883720930233
M00046	3	MLP (single layer)	F1	1
M00046	3	MLP (single layer)	Precision	1
M00046	3	MLP (single layer)	Recall	1
M00046	3	MLP (single layer)	Pos Pred Value	1
M00046	3	MLP (single layer)	Neg Pred Value	1
M00046	5	MLP (single layer)	F1	1
M00046	5	MLP (single layer)	Precision	1
M00046	5	MLP (single layer)	Recall	1
M00046	5	MLP (single layer)	Pos Pred Value	1
M00046	5	MLP (single layer)	Neg Pred Value	1
M00046	7	MLP (single layer)	F1	1
M00046	7	MLP (single layer)	Precision	1
M00046	7	MLP (single layer)	Recall	1
M00046	7	MLP (single layer)	Pos Pred Value	1
M00046	7	MLP (single layer)	Neg Pred Value	1
M00046	10	MLP (single layer)	F1	1
M00046	10	MLP (single layer)	Precision	1
M00046	10	MLP (single layer)	Recall	1
M00046	10	MLP (single layer)	Pos Pred Value	1
M00046	10	MLP (single layer)	Neg Pred Value	1
M00048	0.4	MLP (single layer)	F1	0.8214285714285715
M00048	0.4	MLP (single layer)	Precision	1
M00048	0.4	MLP (single layer)	Recall	0.69697
M00048	0.4	MLP (single layer)	Pos Pred Value	1
M00048	0.4	MLP (single layer)	Neg Pred Value	0.0909091
M00048	0.7	MLP (single layer)	F1	0.8648648648648648
M00048	0.7	MLP (single layer)	Precision	0.9696969696969697
M00048	0.7	MLP (single layer)	Recall	0.7804878048780488
M00048	0.7	MLP (single layer)	Pos Pred Value	0.9696969696969696
M00048	0.7	MLP (single layer)	Neg Pred Value	0
M00048	1	MLP (single layer)	F1	0.9382716049382717
M00048	1	MLP (single layer)	Precision	1
M00048	1	MLP (single layer)	Recall	0.8837209302325582
M00048	1	MLP (single layer)	Pos Pred Value	1
M00048	1	MLP (single layer)	Neg Pred Value	0.16666666666666657
M00048	3	MLP (single layer)	F1	1
M00048	3	MLP (single layer)	Precision	1
M00048	3	MLP (single layer)	Recall	1
M00048	3	MLP (single layer)	Pos Pred Value	1
M00048	3	MLP (single layer)	Neg Pred Value	1
M00048	5	MLP (single layer)	F1	1
M00048	5	MLP (single layer)	Precision	1
M00048	5	MLP (single layer)	Recall	1
M00048	5	MLP (single layer)	Pos Pred Value	1
M00048	5	MLP (single layer)	Neg Pred Value	1
M00048	7	MLP (single layer)	F1	1
M00048	7	MLP (single layer)	Precision	1
M00048	7	MLP (single layer)	Recall	1
M00048	7	MLP (single layer)	Pos Pred Value	1
M00048	7	MLP (single layer)	Neg Pred Value	1
M00048	10	MLP (single layer)	F1	1
M00048	10	MLP (single layer)	Precision	1
M00048	10	MLP (single layer)	Recall	1
M00048	10	MLP (single layer)	Pos Pred Value	1
M00048	10	MLP (single layer)	Neg Pred Value	1
M00049	0.4	MLP (single layer)	F1	0.8214285714285715
M00049	0.4	MLP (single layer)	Precision	1
M00049	0.4	MLP (single layer)	Recall	0.69697
M00049	0.4	MLP (single layer)	Pos Pred Value	1
M00049	0.4	MLP (single layer)	Neg Pred Value	0.0909091
M00049	0.7	MLP (single layer)	F1	0.8918918918918919
M00049	0.7	MLP (single layer)	Precision	1
M00049	0.7	MLP (single layer)	Recall	0.8048780487804879
M00049	0.7	MLP (single layer)	Pos Pred Value	1
M00049	0.7	MLP (single layer)	Neg Pred Value	0.11111111111111126
M00049	1	MLP (single layer)	F1	0.9249999999999999
M00049	1	MLP (single layer)	Precision	1
M00049	1	MLP (single layer)	Recall	0.8604651162790697
M00049	1	MLP (single layer)	Pos Pred Value	1
M00049	1	MLP (single layer)	Neg Pred Value	0.14285714285714274
M00049	3	MLP (single layer)	F1	0.9894736842105264
M00049	3	MLP (single layer)	Precision	1
M00049	3	MLP (single layer)	Recall	0.9791666666666666
M00049	3	MLP (single layer)	Pos Pred Value	1
M00049	3	MLP (single layer)	Neg Pred Value	0.49999999999999983
M00049	5	MLP (single layer)	F1	0.9894736842105264
M00049	5	MLP (single layer)	Precision	1
M00049	5	MLP (single layer)	Recall	0.9791666666666666
M00049	5	MLP (single layer)	Pos Pred Value	1
M00049	5	MLP (single layer)	Neg Pred Value	0.49999999999999983
M00049	7	MLP (single layer)	F1	1
M00049	7	MLP (single layer)	Precision	1
M00049	7	MLP (single layer)	Recall	1
M00049	7	MLP (single layer)	Pos Pred Value	1
M00049	7	MLP (single layer)	Neg Pred Value	1
M00049	10	MLP (single layer)	F1	1
M00049	10	MLP (single layer)	Precision	1
M00049	10	MLP (single layer)	Recall	1
M00049	10	MLP (single layer)	Pos Pred Value	1
M00049	10	MLP (single layer)	Neg Pred Value	1
M00050	0.4	MLP (single layer)	F1	0.8666666666666665
M00050	0.4	MLP (single layer)	Precision	0.9629629629629629
M00050	0.4	MLP (single layer)	Recall	0.7878787878787878
M00050	0.4	MLP (single layer)	Pos Pred Value	0.9629629629629629
M00050	0.4	MLP (single layer)	Neg Pred Value	0
M00050	0.7	MLP (single layer)	F1	0.9350649350649352
M00050	0.7	MLP (single layer)	Precision	1
M00050	0.7	MLP (single layer)	Recall	0.8780487804878049
M00050	0.7	MLP (single layer)	Pos Pred Value	1
M00050	0.7	MLP (single layer)	Neg Pred Value	0.16666666666666682
M00050	1	MLP (single layer)	F1	0.9382716049382717
M00050	1	MLP (single layer)	Precision	1
M00050	1	MLP (single layer)	Recall	0.8837209302325582
M00050	1	MLP (single layer)	Pos Pred Value	1
M00050	1	MLP (single layer)	Neg Pred Value	0.16666666666666657
M00050	3	MLP (single layer)	F1	0.9787234042553191
M00050	3	MLP (single layer)	Precision	1
M00050	3	MLP (single layer)	Recall	0.9583333333333334
M00050	3	MLP (single layer)	Pos Pred Value	1
M00050	3	MLP (single layer)	Neg Pred Value	0.3333333333333338
M00050	5	MLP (single layer)	F1	1
M00050	5	MLP (single layer)	Precision	1
M00050	5	MLP (single layer)	Recall	1
M00050	5	MLP (single layer)	Pos Pred Value	1
M00050	5	MLP (single layer)	Neg Pred Value	1
M00050	7	MLP (single layer)	F1	1
M00050	7	MLP (single layer)	Precision	1
M00050	7	MLP (single layer)	Recall	1
M00050	7	MLP (single layer)	Pos Pred Value	1
M00050	7	MLP (single layer)	Neg Pred Value	1
M00050	10	MLP (single layer)	F1	1
M00050	10	MLP (single layer)	Precision	1
M00050	10	MLP (single layer)	Recall	1
M00050	10	MLP (single layer)	Pos Pred Value	1
M00050	10	MLP (single layer)	Neg Pred Value	1
M00051	0.4	MLP (single layer)	F1	0
M00051	0.4	MLP (single layer)	Precision	0
M00051	0.4	MLP (single layer)	Recall	0
M00051	0.4	MLP (single layer)	Pos Pred Value	0
M00051	0.4	MLP (single layer)	Neg Pred Value	0.9705882352941176
M00051	0.7	MLP (single layer)	F1	0
M00051	0.7	MLP (single layer)	Precision	0
M00051	0.7	MLP (single layer)	Recall	0
M00051	0.7	MLP (single layer)	Pos Pred Value	0
M00051	0.7	MLP (single layer)	Neg Pred Value	0.9761904761904762
M00051	1	MLP (single layer)	F1	0
M00051	1	MLP (single layer)	Precision	0
M00051	1	MLP (single layer)	Recall	0
M00051	1	MLP (single layer)	Pos Pred Value	0
M00051	1	MLP (single layer)	Neg Pred Value	0.9772727272727273
M00051	3	MLP (single layer)	F1	0
M00051	3	MLP (single layer)	Precision	0
M00051	3	MLP (single layer)	Recall	0
M00051	3	MLP (single layer)	Pos Pred Value	0
M00051	3	MLP (single layer)	Neg Pred Value	0.9795918367346939
M00051	5	MLP (single layer)	F1	0
M00051	5	MLP (single layer)	Precision	0
M00051	5	MLP (single layer)	Recall	0
M00051	5	MLP (single layer)	Pos Pred Value	0
M00051	5	MLP (single layer)	Neg Pred Value	0.9795918367346939
M00051	7	MLP (single layer)	F1	0
M00051	7	MLP (single layer)	Precision	0
M00051	7	MLP (single layer)	Recall	0
M00051	7	MLP (single layer)	Pos Pred Value	0
M00051	7	MLP (single layer)	Neg Pred Value	0.9795918367346939
M00051	10	MLP (single layer)	F1	1
M00051	10	MLP (single layer)	Precision	1
M00051	10	MLP (single layer)	Recall	1
M00051	10	MLP (single layer)	Pos Pred Value	1
M00051	10	MLP (single layer)	Neg Pred Value	1
M00052	0.4	MLP (single layer)	F1	0.8852459016393442
M00052	0.4	MLP (single layer)	Precision	0.9642857142857143
M00052	0.4	MLP (single layer)	Recall	0.8181818181818182
M00052	0.4	MLP (single layer)	Pos Pred Value	0.9642857142857143
M00052	0.4	MLP (single layer)	Neg Pred Value	0
M00052	0.7	MLP (single layer)	F1	0.9487179487179488
M00052	0.7	MLP (single layer)	Precision	1
M00052	0.7	MLP (single layer)	Recall	0.9024390243902439
M00052	0.7	MLP (single layer)	Pos Pred Value	1
M00052	0.7	MLP (single layer)	Neg Pred Value	0.20000000000000023
M00052	1	MLP (single layer)	F1	0.9761904761904763
M00052	1	MLP (single layer)	Precision	1
M00052	1	MLP (single layer)	Recall	0.9534883720930233
M00052	1	MLP (single layer)	Pos Pred Value	1
M00052	1	MLP (single layer)	Neg Pred Value	0.33333333333333326
M00052	3	MLP (single layer)	F1	1
M00052	3	MLP (single layer)	Precision	1
M00052	3	MLP (single layer)	Recall	1
M00052	3	MLP (single layer)	Pos Pred Value	1
M00052	3	MLP (single layer)	Neg Pred Value	1
M00052	5	MLP (single layer)	F1	1
M00052	5	MLP (single layer)	Precision	1
M00052	5	MLP (single layer)	Recall	1
M00052	5	MLP (single layer)	Pos Pred Value	1
M00052	5	MLP (single layer)	Neg Pred Value	1
M00052	7	MLP (single layer)	F1	1
M00052	7	MLP (single layer)	Precision	1
M00052	7	MLP (single layer)	Recall	1
M00052	7	MLP (single layer)	Pos Pred Value	1
M00052	7	MLP (single layer)	Neg Pred Value	1
M00052	10	MLP (single layer)	F1	1
M00052	10	MLP (single layer)	Precision	1
M00052	10	MLP (single layer)	Recall	1
M00052	10	MLP (single layer)	Pos Pred Value	1
M00052	10	MLP (single layer)	Neg Pred Value	1
M00053	0.4	MLP (single layer)	F1	0.8
M00053	0.4	MLP (single layer)	Precision	1
M00053	0.4	MLP (single layer)	Recall	0.6666666666666666
M00053	0.4	MLP (single layer)	Pos Pred Value	1
M00053	0.4	MLP (single layer)	Neg Pred Value	0.0833333
M00053	0.7	MLP (single layer)	F1	0.87671232876712335
M00053	0.7	MLP (single layer)	Precision	1
M00053	0.7	MLP (single layer)	Recall	0.7804878048780488
M00053	0.7	MLP (single layer)	Pos Pred Value	1
M00053	0.7	MLP (single layer)	Neg Pred Value	0.10000000000000012
M00053	1	MLP (single layer)	F1	0.9249999999999999
M00053	1	MLP (single layer)	Precision	1
M00053	1	MLP (single layer)	Recall	0.8604651162790697
M00053	1	MLP (single layer)	Pos Pred Value	1
M00053	1	MLP (single layer)	Neg Pred Value	0.14285714285714274
M00053	3	MLP (single layer)	F1	1
M00053	3	MLP (single layer)	Precision	1
M00053	3	MLP (single layer)	Recall	1
M00053	3	MLP (single layer)	Pos Pred Value	1
M00053	3	MLP (single layer)	Neg Pred Value	1
M00053	5	MLP (single layer)	F1	0.9894736842105264
M00053	5	MLP (single layer)	Precision	1
M00053	5	MLP (single layer)	Recall	0.9791666666666666
M00053	5	MLP (single layer)	Pos Pred Value	1
M00053	5	MLP (single layer)	Neg Pred Value	0.49999999999999983
M00053	7	MLP (single layer)	F1	1
M00053	7	MLP (single layer)	Precision	1
M00053	7	MLP (single layer)	Recall	1
M00053	7	MLP (single layer)	Pos Pred Value	1
M00053	7	MLP (single layer)	Neg Pred Value	1
M00053	10	MLP (single layer)	F1	1
M00053	10	MLP (single layer)	Precision	1
M00053	10	MLP (single layer)	Recall	1
M00053	10	MLP (single layer)	Pos Pred Value	1
M00053	10	MLP (single layer)	Neg Pred Value	1
M00060	0.4	MLP (single layer)	F1	0.7499999999999999
M00060	0.4	MLP (single layer)	Precision	1
M00060	0.4	MLP (single layer)	Recall	0.6
M00060	0.4	MLP (single layer)	Pos Pred Value	1
M00060	0.4	MLP (single layer)	Neg Pred Value	0.9354838709677419
M00060	0.7	MLP (single layer)	F1	0.7692307692307693
M00060	0.7	MLP (single layer)	Precision	1
M00060	0.7	MLP (single layer)	Recall	0.625
M00060	0.7	MLP (single layer)	Pos Pred Value	1
M00060	0.7	MLP (single layer)	Neg Pred Value	0.918919
M00060	1	MLP (single layer)	F1	0.8
M00060	1	MLP (single layer)	Precision	1
M00060	1	MLP (single layer)	Recall	0.6666666666666666
M00060	1	MLP (single layer)	Pos Pred Value	1
M00060	1	MLP (single layer)	Neg Pred Value	0.9210526315789473
M00060	3	MLP (single layer)	F1	1
M00060	3	MLP (single layer)	Precision	1
M00060	3	MLP (single layer)	Recall	1
M00060	3	MLP (single layer)	Pos Pred Value	1
M00060	3	MLP (single layer)	Neg Pred Value	1
M00060	5	MLP (single layer)	F1	1
M00060	5	MLP (single layer)	Precision	1
M00060	5	MLP (single layer)	Recall	1
M00060	5	MLP (single layer)	Pos Pred Value	1
M00060	5	MLP (single layer)	Neg Pred Value	1
M00060	7	MLP (single layer)	F1	1
M00060	7	MLP (single layer)	Precision	1
M00060	7	MLP (single layer)	Recall	1
M00060	7	MLP (single layer)	Pos Pred Value	1
M00060	7	MLP (single layer)	Neg Pred Value	1
M00060	10	MLP (single layer)	F1	1
M00060	10	MLP (single layer)	Precision	1
M00060	10	MLP (single layer)	Recall	1
M00060	10	MLP (single layer)	Pos Pred Value	1
M00060	10	MLP (single layer)	Neg Pred Value	1
M00061	0.4	MLP (single layer)	F1	0.5
M00061	0.4	MLP (single layer)	Precision	0.6666666666666666
M00061	0.4	MLP (single layer)	Recall	0.4
M00061	0.4	MLP (single layer)	Pos Pred Value	0.666667
M00061	0.4	MLP (single layer)	Neg Pred Value	0.9032258064516129
M00061	0.7	MLP (single layer)	F1	0.8571428571428571
M00061	0.7	MLP (single layer)	Precision	1
M00061	0.7	MLP (single layer)	Recall	0.75
M00061	0.7	MLP (single layer)	Pos Pred Value	1
M00061	0.7	MLP (single layer)	Neg Pred Value	0.9444444444444444
M00061	1	MLP (single layer)	F1	0.823529
M00061	1	MLP (single layer)	Precision	0.875
M00061	1	MLP (single layer)	Recall	0.7777777777777778
M00061	1	MLP (single layer)	Pos Pred Value	0.875
M00061	1	MLP (single layer)	Neg Pred Value	0.9444444444444445
M00061	3	MLP (single layer)	F1	0.9600000000000001
M00061	3	MLP (single layer)	Precision	1
M00061	3	MLP (single layer)	Recall	0.9230769230769231
M00061	3	MLP (single layer)	Pos Pred Value	1
M00061	3	MLP (single layer)	Neg Pred Value	0.9729729729729729
M00061	5	MLP (single layer)	F1	0.962963
M00061	5	MLP (single layer)	Precision	0.9285714285714286
M00061	5	MLP (single layer)	Recall	1
M00061	5	MLP (single layer)	Pos Pred Value	0.9285714285714285
M00061	5	MLP (single layer)	Neg Pred Value	1
M00061	7	MLP (single layer)	F1	1
M00061	7	MLP (single layer)	Precision	1
M00061	7	MLP (single layer)	Recall	1
M00061	7	MLP (single layer)	Pos Pred Value	1
M00061	7	MLP (single layer)	Neg Pred Value	1
M00061	10	MLP (single layer)	F1	1
M00061	10	MLP (single layer)	Precision	1
M00061	10	MLP (single layer)	Recall	1
M00061	10	MLP (single layer)	Pos Pred Value	1
M00061	10	MLP (single layer)	Neg Pred Value	1
M00063	0.4	MLP (single layer)	F1	0.9268292682926829
M00063	0.4	MLP (single layer)	Precision	1
M00063	0.4	MLP (single layer)	Recall	0.8636363636363636
M00063	0.4	MLP (single layer)	Pos Pred Value	1
M00063	0.4	MLP (single layer)	Neg Pred Value	0.7999999999999999
M00063	0.7	MLP (single layer)	F1	0.9433962264150945
M00063	0.7	MLP (single layer)	Precision	1
M00063	0.7	MLP (single layer)	Recall	0.8928571428571429
M00063	0.7	MLP (single layer)	Pos Pred Value	1
M00063	0.7	MLP (single layer)	Neg Pred Value	0.823529
M00063	1	MLP (single layer)	F1	1
M00063	1	MLP (single layer)	Precision	1
M00063	1	MLP (single layer)	Recall	1
M00063	1	MLP (single layer)	Pos Pred Value	1
M00063	1	MLP (single layer)	Neg Pred Value	1
M00063	3	MLP (single layer)	F1	0.9850746268656716
M00063	3	MLP (single layer)	Precision	1
M00063	3	MLP (single layer)	Recall	0.9705882352941176
M00063	3	MLP (single layer)	Pos Pred Value	1
M00063	3	MLP (single layer)	Neg Pred Value	0.9374999999999999
M00063	5	MLP (single layer)	F1	1
M00063	5	MLP (single layer)	Precision	1
M00063	5	MLP (single layer)	Recall	1
M00063	5	MLP (single layer)	Pos Pred Value	1
M00063	5	MLP (single layer)	Neg Pred Value	1
M00063	7	MLP (single layer)	F1	0.9850746268656716
M00063	7	MLP (single layer)	Precision	1
M00063	7	MLP (single layer)	Recall	0.9705882352941176
M00063	7	MLP (single layer)	Pos Pred Value	1
M00063	7	MLP (single layer)	Neg Pred Value	0.9374999999999999
M00063	10	MLP (single layer)	F1	0.9850746268656716
M00063	10	MLP (single layer)	Precision	1
M00063	10	MLP (single layer)	Recall	0.9705882352941176
M00063	10	MLP (single layer)	Pos Pred Value	1
M00063	10	MLP (single layer)	Neg Pred Value	0.9374999999999999
M00064	0.4	MLP (single layer)	F1	0.6896551724137931
M00064	0.4	MLP (single layer)	Precision	0.9090909090909091
M00064	0.4	MLP (single layer)	Recall	0.5555555555555556
M00064	0.4	MLP (single layer)	Pos Pred Value	0.9090909090909091
M00064	0.4	MLP (single layer)	Neg Pred Value	0.6521739130434782
M00064	0.7	MLP (single layer)	F1	0.8292682926829269
M00064	0.7	MLP (single layer)	Precision	0.9444444444444444
M00064	0.7	MLP (single layer)	Recall	0.7391304347826086
M00064	0.7	MLP (single layer)	Pos Pred Value	0.9444444444444444
M00064	0.7	MLP (single layer)	Neg Pred Value	0.7499999999999999
M00064	1	MLP (single layer)	F1	0.8444444444444444
M00064	1	MLP (single layer)	Precision	0.9047619047619048
M00064	1	MLP (single layer)	Recall	0.7916666666666666
M00064	1	MLP (single layer)	Pos Pred Value	0.9047619047619048
M00064	1	MLP (single layer)	Neg Pred Value	0.782609
M00064	3	MLP (single layer)	F1	0.9655172413793104
M00064	3	MLP (single layer)	Precision	0.9655172413793104
M00064	3	MLP (single layer)	Recall	0.9655172413793104
M00064	3	MLP (single layer)	Pos Pred Value	0.9655172413793103
M00064	3	MLP (single layer)	Neg Pred Value	0.9500000000000001
M00064	5	MLP (single layer)	F1	1
M00064	5	MLP (single layer)	Precision	1
M00064	5	MLP (single layer)	Recall	1
M00064	5	MLP (single layer)	Pos Pred Value	1
M00064	5	MLP (single layer)	Neg Pred Value	1
M00064	7	MLP (single layer)	F1	1
M00064	7	MLP (single layer)	Precision	1
M00064	7	MLP (single layer)	Recall	1
M00064	7	MLP (single layer)	Pos Pred Value	1
M00064	7	MLP (single layer)	Neg Pred Value	1
M00064	10	MLP (single layer)	F1	1
M00064	10	MLP (single layer)	Precision	1
M00064	10	MLP (single layer)	Recall	1
M00064	10	MLP (single layer)	Pos Pred Value	1
M00064	10	MLP (single layer)	Neg Pred Value	1
M00082	0.4	MLP (single layer)	F1	0.8076923076923077
M00082	0.4	MLP (single layer)	Precision	0.9545454545454546
M00082	0.4	MLP (single layer)	Recall	0.7
M00082	0.4	MLP (single layer)	Pos Pred Value	0.9545454545454545
M00082	0.4	MLP (single layer)	Neg Pred Value	0.25
M00082	0.7	MLP (single layer)	F1	0.835821
M00082	0.7	MLP (single layer)	Precision	0.9655172413793104
M00082	0.7	MLP (single layer)	Recall	0.7368421052631579
M00082	0.7	MLP (single layer)	Pos Pred Value	0.9655172413793103
M00082	0.7	MLP (single layer)	Neg Pred Value	0.23076923076923075
M00082	1	MLP (single layer)	F1	0.888889
M00082	1	MLP (single layer)	Precision	1
M00082	1	MLP (single layer)	Recall	0.8
M00082	1	MLP (single layer)	Pos Pred Value	1
M00082	1	MLP (single layer)	Neg Pred Value	0.3333333333333335
M00082	3	MLP (single layer)	F1	0.9285714285714286
M00082	3	MLP (single layer)	Precision	1
M00082	3	MLP (single layer)	Recall	0.8666666666666667
M00082	3	MLP (single layer)	Pos Pred Value	1
M00082	3	MLP (single layer)	Neg Pred Value	0.4
M00082	5	MLP (single layer)	F1	0.9285714285714286
M00082	5	MLP (single layer)	Precision	1
M00082	5	MLP (single layer)	Recall	0.8666666666666667
M00082	5	MLP (single layer)	Pos Pred Value	1
M00082	5	MLP (single layer)	Neg Pred Value	0.4
M00082	7	MLP (single layer)	F1	0.9156626506024096
M00082	7	MLP (single layer)	Precision	1
M00082	7	MLP (single layer)	Recall	0.8444444444444444
M00082	7	MLP (single layer)	Pos Pred Value	1
M00082	7	MLP (single layer)	Neg Pred Value	0.3636363636363636
M00082	10	MLP (single layer)	F1	0.9285714285714286
M00082	10	MLP (single layer)	Precision	1
M00082	10	MLP (single layer)	Recall	0.8666666666666667
M00082	10	MLP (single layer)	Pos Pred Value	1
M00082	10	MLP (single layer)	Neg Pred Value	0.4
M00083	0.4	MLP (single layer)	F1	0.8275862068965517
M00083	0.4	MLP (single layer)	Precision	0.9230769230769231
M00083	0.4	MLP (single layer)	Recall	0.75
M00083	0.4	MLP (single layer)	Pos Pred Value	0.923077
M00083	0.4	MLP (single layer)	Neg Pred Value	0
M00083	0.7	MLP (single layer)	F1	0.87671232876712335
M00083	0.7	MLP (single layer)	Precision	0.9696969696969697
M00083	0.7	MLP (single layer)	Recall	0.8
M00083	0.7	MLP (single layer)	Pos Pred Value	0.9696969696969696
M00083	0.7	MLP (single layer)	Neg Pred Value	0.11111111111111126
M00083	1	MLP (single layer)	F1	0.9090909090909091
M00083	1	MLP (single layer)	Precision	0.9722222222222222
M00083	1	MLP (single layer)	Recall	0.8536585365853658
M00083	1	MLP (single layer)	Pos Pred Value	0.9722222222222222
M00083	1	MLP (single layer)	Neg Pred Value	0.25000000000000006
M00083	3	MLP (single layer)	F1	0.9318181818181818
M00083	3	MLP (single layer)	Precision	0.9761904761904762
M00083	3	MLP (single layer)	Recall	0.8913043478260869
M00083	3	MLP (single layer)	Pos Pred Value	0.9761904761904762
M00083	3	MLP (single layer)	Neg Pred Value	0.2857142857142855
M00083	5	MLP (single layer)	F1	0.967033
M00083	5	MLP (single layer)	Precision	0.9777777777777777
M00083	5	MLP (single layer)	Recall	0.9565217391304348
M00083	5	MLP (single layer)	Pos Pred Value	0.9777777777777777
M00083	5	MLP (single layer)	Neg Pred Value	0.4999999999999999
M00083	7	MLP (single layer)	F1	0.967033
M00083	7	MLP (single layer)	Precision	0.9777777777777777
M00083	7	MLP (single layer)	Recall	0.9565217391304348
M00083	7	MLP (single layer)	Pos Pred Value	0.9777777777777777
M00083	7	MLP (single layer)	Neg Pred Value	0.4999999999999999
M00083	10	MLP (single layer)	F1	0.9782608695652174
M00083	10	MLP (single layer)	Precision	0.9782608695652174
M00083	10	MLP (single layer)	Recall	0.9782608695652174
M00083	10	MLP (single layer)	Pos Pred Value	0.9782608695652174
M00083	10	MLP (single layer)	Neg Pred Value	0.6666666666666666
M00086	0.4	MLP (single layer)	F1	0.8163265306122449
M00086	0.4	MLP (single layer)	Precision	1
M00086	0.4	MLP (single layer)	Recall	0.6896551724137931
M00086	0.4	MLP (single layer)	Pos Pred Value	1
M00086	0.4	MLP (single layer)	Neg Pred Value	0.35714285714285726
M00086	0.7	MLP (single layer)	F1	0.911765
M00086	0.7	MLP (single layer)	Precision	1
M00086	0.7	MLP (single layer)	Recall	0.8378378378378378
M00086	0.7	MLP (single layer)	Pos Pred Value	1
M00086	0.7	MLP (single layer)	Neg Pred Value	0.4545454545454546
M00086	1	MLP (single layer)	F1	0.958904
M00086	1	MLP (single layer)	Precision	1
M00086	1	MLP (single layer)	Recall	0.9210526315789473
M00086	1	MLP (single layer)	Pos Pred Value	1
M00086	1	MLP (single layer)	Neg Pred Value	0.6666666666666666
M00086	3	MLP (single layer)	F1	0.9761904761904763
M00086	3	MLP (single layer)	Precision	1
M00086	3	MLP (single layer)	Recall	0.9534883720930233
M00086	3	MLP (single layer)	Pos Pred Value	1
M00086	3	MLP (single layer)	Neg Pred Value	0.7500000000000001
M00086	5	MLP (single layer)	F1	0.988235
M00086	5	MLP (single layer)	Precision	1
M00086	5	MLP (single layer)	Recall	0.9767441860465116
M00086	5	MLP (single layer)	Pos Pred Value	1
M00086	5	MLP (single layer)	Neg Pred Value	0.857143
M00086	7	MLP (single layer)	F1	0.988235
M00086	7	MLP (single layer)	Precision	1
M00086	7	MLP (single layer)	Recall	0.9767441860465116
M00086	7	MLP (single layer)	Pos Pred Value	1
M00086	7	MLP (single layer)	Neg Pred Value	0.857143
M00086	10	MLP (single layer)	F1	1
M00086	10	MLP (single layer)	Precision	1
M00086	10	MLP (single layer)	Recall	1
M00086	10	MLP (single layer)	Pos Pred Value	1
M00086	10	MLP (single layer)	Neg Pred Value	1
M00087	0.4	MLP (single layer)	F1	0
M00087	0.4	MLP (single layer)	Precision	0
M00087	0.4	MLP (single layer)	Recall	0
M00087	0.4	MLP (single layer)	Pos Pred Value	0
M00087	0.4	MLP (single layer)	Neg Pred Value	0
M00087	0.7	MLP (single layer)	F1	0
M00087	0.7	MLP (single layer)	Precision	0
M00087	0.7	MLP (single layer)	Recall	0
M00087	0.7	MLP (single layer)	Pos Pred Value	0
M00087	0.7	MLP (single layer)	Neg Pred Value	0.9761904761904762
M00087	1	MLP (single layer)	F1	0
M00087	1	MLP (single layer)	Precision	0
M00087	1	MLP (single layer)	Recall	0
M00087	1	MLP (single layer)	Pos Pred Value	0
M00087	1	MLP (single layer)	Neg Pred Value	0.9772727272727273
M00087	3	MLP (single layer)	F1	1
M00087	3	MLP (single layer)	Precision	1
M00087	3	MLP (single layer)	Recall	1
M00087	3	MLP (single layer)	Pos Pred Value	1
M00087	3	MLP (single layer)	Neg Pred Value	1
M00087	5	MLP (single layer)	F1	1
M00087	5	MLP (single layer)	Precision	1
M00087	5	MLP (single layer)	Recall	1
M00087	5	MLP (single layer)	Pos Pred Value	1
M00087	5	MLP (single layer)	Neg Pred Value	1
M00087	7	MLP (single layer)	F1	1
M00087	7	MLP (single layer)	Precision	1
M00087	7	MLP (single layer)	Recall	1
M00087	7	MLP (single layer)	Pos Pred Value	1
M00087	7	MLP (single layer)	Neg Pred Value	1
M00087	10	MLP (single layer)	F1	1
M00087	10	MLP (single layer)	Precision	1
M00087	10	MLP (single layer)	Recall	1
M00087	10	MLP (single layer)	Pos Pred Value	1
M00087	10	MLP (single layer)	Neg Pred Value	1
M00091	0.4	MLP (single layer)	F1	0.6666666666666666
M00091	0.4	MLP (single layer)	Precision	1
M00091	0.4	MLP (single layer)	Recall	0.5
M00091	0.4	MLP (single layer)	Pos Pred Value	1
M00091	0.4	MLP (single layer)	Neg Pred Value	0.9696969696969697
M00091	0.7	MLP (single layer)	F1	0.5714285714285715
M00091	0.7	MLP (single layer)	Precision	1
M00091	0.7	MLP (single layer)	Recall	0.4
M00091	0.7	MLP (single layer)	Pos Pred Value	1
M00091	0.7	MLP (single layer)	Neg Pred Value	0.925
M00091	1	MLP (single layer)	F1	0.8000000000000002
M00091	1	MLP (single layer)	Precision	0.8
M00091	1	MLP (single layer)	Recall	0.8
M00091	1	MLP (single layer)	Pos Pred Value	0.7999999999999998
M00091	1	MLP (single layer)	Neg Pred Value	0.9743589743589743
M00091	3	MLP (single layer)	F1	0.7272727272727272
M00091	3	MLP (single layer)	Precision	0.6666666666666666
M00091	3	MLP (single layer)	Recall	0.8
M00091	3	MLP (single layer)	Pos Pred Value	0.6666666666666669
M00091	3	MLP (single layer)	Neg Pred Value	0.9767441860465116
M00091	5	MLP (single layer)	F1	0.9090909090909091
M00091	5	MLP (single layer)	Precision	0.8333333333333334
M00091	5	MLP (single layer)	Recall	1
M00091	5	MLP (single layer)	Pos Pred Value	0.8333333333333335
M00091	5	MLP (single layer)	Neg Pred Value	1
M00091	7	MLP (single layer)	F1	1
M00091	7	MLP (single layer)	Precision	1
M00091	7	MLP (single layer)	Recall	1
M00091	7	MLP (single layer)	Pos Pred Value	1
M00091	7	MLP (single layer)	Neg Pred Value	1
M00091	10	MLP (single layer)	F1	1
M00091	10	MLP (single layer)	Precision	1
M00091	10	MLP (single layer)	Recall	1
M00091	10	MLP (single layer)	Pos Pred Value	1
M00091	10	MLP (single layer)	Neg Pred Value	1
M00093	0.4	MLP (single layer)	F1	0.92
M00093	0.4	MLP (single layer)	Precision	1
M00093	0.4	MLP (single layer)	Recall	0.8518518518518519
M00093	0.4	MLP (single layer)	Pos Pred Value	1
M00093	0.4	MLP (single layer)	Neg Pred Value	0.6363636363636365
M00093	0.7	MLP (single layer)	F1	0.923077
M00093	0.7	MLP (single layer)	Precision	1
M00093	0.7	MLP (single layer)	Recall	0.8571428571428571
M00093	0.7	MLP (single layer)	Pos Pred Value	1
M00093	0.7	MLP (single layer)	Neg Pred Value	0.5833333333333333
M00093	1	MLP (single layer)	F1	0.9714285714285714
M00093	1	MLP (single layer)	Precision	1
M00093	1	MLP (single layer)	Recall	0.9444444444444444
M00093	1	MLP (single layer)	Pos Pred Value	1
M00093	1	MLP (single layer)	Neg Pred Value	0.7999999999999999
M00093	3	MLP (single layer)	F1	0.9876543209876543
M00093	3	MLP (single layer)	Precision	1
M00093	3	MLP (single layer)	Recall	0.97561
M00093	3	MLP (single layer)	Pos Pred Value	1
M00093	3	MLP (single layer)	Neg Pred Value	0.8888888888888887
M00093	5	MLP (single layer)	F1	0.9876543209876543
M00093	5	MLP (single layer)	Precision	1
M00093	5	MLP (single layer)	Recall	0.97561
M00093	5	MLP (single layer)	Pos Pred Value	1
M00093	5	MLP (single layer)	Neg Pred Value	0.8888888888888887
M00093	7	MLP (single layer)	F1	0.9876543209876543
M00093	7	MLP (single layer)	Precision	1
M00093	7	MLP (single layer)	Recall	0.97561
M00093	7	MLP (single layer)	Pos Pred Value	1
M00093	7	MLP (single layer)	Neg Pred Value	0.8888888888888887
M00093	10	MLP (single layer)	F1	1
M00093	10	MLP (single layer)	Precision	1
M00093	10	MLP (single layer)	Recall	1
M00093	10	MLP (single layer)	Pos Pred Value	1
M00093	10	MLP (single layer)	Neg Pred Value	1
M00096	0.4	MLP (single layer)	F1	0.8
M00096	0.4	MLP (single layer)	Precision	1
M00096	0.4	MLP (single layer)	Recall	0.6666666666666666
M00096	0.4	MLP (single layer)	Pos Pred Value	1
M00096	0.4	MLP (single layer)	Neg Pred Value	0.9333333333333333
M00096	0.7	MLP (single layer)	F1	0.7142857142857143
M00096	0.7	MLP (single layer)	Precision	1
M00096	0.7	MLP (single layer)	Recall	0.5555555555555556
M00096	0.7	MLP (single layer)	Pos Pred Value	1
M00096	0.7	MLP (single layer)	Neg Pred Value	0.8918918918918919
M00096	1	MLP (single layer)	F1	0.9473684210526316
M00096	1	MLP (single layer)	Precision	1
M00096	1	MLP (single layer)	Recall	0.9
M00096	1	MLP (single layer)	Pos Pred Value	1
M00096	1	MLP (single layer)	Neg Pred Value	0.9714285714285714
M00096	3	MLP (single layer)	F1	0.9655172413793104
M00096	3	MLP (single layer)	Precision	0.9333333333333333
M00096	3	MLP (single layer)	Recall	1
M00096	3	MLP (single layer)	Pos Pred Value	0.9333333333333332
M00096	3	MLP (single layer)	Neg Pred Value	1
M00096	5	MLP (single layer)	F1	0.9333333333333333
M00096	5	MLP (single layer)	Precision	0.875
M00096	5	MLP (single layer)	Recall	1
M00096	5	MLP (single layer)	Pos Pred Value	0.8749999999999999
M00096	5	MLP (single layer)	Neg Pred Value	1
M00096	7	MLP (single layer)	F1	0.9333333333333333
M00096	7	MLP (single layer)	Precision	0.875
M00096	7	MLP (single layer)	Recall	1
M00096	7	MLP (single layer)	Pos Pred Value	0.8749999999999999
M00096	7	MLP (single layer)	Neg Pred Value	1
M00096	10	MLP (single layer)	F1	0.9333333333333333
M00096	10	MLP (single layer)	Precision	0.875
M00096	10	MLP (single layer)	Recall	1
M00096	10	MLP (single layer)	Pos Pred Value	0.8749999999999999
M00096	10	MLP (single layer)	Neg Pred Value	1
M00098	0.4	MLP (single layer)	F1	0.6
M00098	0.4	MLP (single layer)	Precision	0.5
M00098	0.4	MLP (single layer)	Recall	0.75
M00098	0.4	MLP (single layer)	Pos Pred Value	0.5
M00098	0.4	MLP (single layer)	Neg Pred Value	0.9642857142857143
M00098	0.7	MLP (single layer)	F1	0.75
M00098	0.7	MLP (single layer)	Precision	0.75
M00098	0.7	MLP (single layer)	Recall	0.75
M00098	0.7	MLP (single layer)	Pos Pred Value	0.75
M00098	0.7	MLP (single layer)	Neg Pred Value	0.9411764705882353
M00098	1	MLP (single layer)	F1	0.888889
M00098	1	MLP (single layer)	Precision	0.8
M00098	1	MLP (single layer)	Recall	1
M00098	1	MLP (single layer)	Pos Pred Value	0.7999999999999999
M00098	1	MLP (single layer)	Neg Pred Value	1
M00098	3	MLP (single layer)	F1	0.888889
M00098	3	MLP (single layer)	Precision	0.8
M00098	3	MLP (single layer)	Recall	1
M00098	3	MLP (single layer)	Pos Pred Value	0.7999999999999998
M00098	3	MLP (single layer)	Neg Pred Value	1
M00098	5	MLP (single layer)	F1	0.8421052631578948
M00098	5	MLP (single layer)	Precision	0.7272727272727273
M00098	5	MLP (single layer)	Recall	1
M00098	5	MLP (single layer)	Pos Pred Value	0.7272727272727274
M00098	5	MLP (single layer)	Neg Pred Value	1
M00098	7	MLP (single layer)	F1	0.8
M00098	7	MLP (single layer)	Precision	0.6666666666666666
M00098	7	MLP (single layer)	Recall	1
M00098	7	MLP (single layer)	Pos Pred Value	0.6666666666666667
M00098	7	MLP (single layer)	Neg Pred Value	1
M00098	10	MLP (single layer)	F1	0.8
M00098	10	MLP (single layer)	Precision	0.6666666666666666
M00098	10	MLP (single layer)	Recall	1
M00098	10	MLP (single layer)	Pos Pred Value	0.6666666666666667
M00098	10	MLP (single layer)	Neg Pred Value	1
M00115	0.4	MLP (single layer)	F1	0.33333333333333337
M00115	0.4	MLP (single layer)	Precision	0.36363636363636365
M00115	0.4	MLP (single layer)	Recall	0.3076923076923077
M00115	0.4	MLP (single layer)	Pos Pred Value	0.3636363636363636
M00115	0.4	MLP (single layer)	Neg Pred Value	0.6086956521739131
M00115	0.7	MLP (single layer)	F1	0.5
M00115	0.7	MLP (single layer)	Precision	0.6666666666666666
M00115	0.7	MLP (single layer)	Recall	0.4
M00115	0.7	MLP (single layer)	Pos Pred Value	0.6666666666666666
M00115	0.7	MLP (single layer)	Neg Pred Value	0.6
M00115	1	MLP (single layer)	F1	0.7317073170731706
M00115	1	MLP (single layer)	Precision	0.75
M00115	1	MLP (single layer)	Recall	0.7142857142857143
M00115	1	MLP (single layer)	Pos Pred Value	0.75
M00115	1	MLP (single layer)	Neg Pred Value	0.7500000000000001
M00115	3	MLP (single layer)	F1	0.7777777777777777
M00115	3	MLP (single layer)	Precision	0.7241379310344828
M00115	3	MLP (single layer)	Recall	0.84
M00115	3	MLP (single layer)	Pos Pred Value	0.7241379310344828
M00115	3	MLP (single layer)	Neg Pred Value	0.7999999999999999
M00115	5	MLP (single layer)	F1	0.7586206896551725
M00115	5	MLP (single layer)	Precision	0.6666666666666666
M00115	5	MLP (single layer)	Recall	0.88
M00115	5	MLP (single layer)	Pos Pred Value	0.6666666666666667
M00115	5	MLP (single layer)	Neg Pred Value	0.8125
M00115	7	MLP (single layer)	F1	0.793103
M00115	7	MLP (single layer)	Precision	0.69697
M00115	7	MLP (single layer)	Recall	0.92
M00115	7	MLP (single layer)	Pos Pred Value	0.69697
M00115	7	MLP (single layer)	Neg Pred Value	0.875
M00115	10	MLP (single layer)	F1	0.7796610169491526
M00115	10	MLP (single layer)	Precision	0.6764705882352942
M00115	10	MLP (single layer)	Recall	0.92
M00115	10	MLP (single layer)	Pos Pred Value	0.6764705882352942
M00115	10	MLP (single layer)	Neg Pred Value	0.8666666666666667
M00116	0.4	MLP (single layer)	F1	0.7499999999999999
M00116	0.4	MLP (single layer)	Precision	1
M00116	0.4	MLP (single layer)	Recall	0.6
M00116	0.4	MLP (single layer)	Pos Pred Value	1
M00116	0.4	MLP (single layer)	Neg Pred Value	0.9354838709677419
M00116	0.7	MLP (single layer)	F1	0.8571428571428571
M00116	0.7	MLP (single layer)	Precision	1
M00116	0.7	MLP (single layer)	Recall	0.75
M00116	0.7	MLP (single layer)	Pos Pred Value	1
M00116	0.7	MLP (single layer)	Neg Pred Value	0.9444444444444444
M00116	1	MLP (single layer)	F1	0.8
M00116	1	MLP (single layer)	Precision	1
M00116	1	MLP (single layer)	Recall	0.6666666666666666
M00116	1	MLP (single layer)	Pos Pred Value	1
M00116	1	MLP (single layer)	Neg Pred Value	0.9210526315789473
M00116	3	MLP (single layer)	F1	0.9600000000000001
M00116	3	MLP (single layer)	Precision	1
M00116	3	MLP (single layer)	Recall	0.9230769230769231
M00116	3	MLP (single layer)	Pos Pred Value	1
M00116	3	MLP (single layer)	Neg Pred Value	0.9729729729729729
M00116	5	MLP (single layer)	F1	1
M00116	5	MLP (single layer)	Precision	1
M00116	5	MLP (single layer)	Recall	1
M00116	5	MLP (single layer)	Pos Pred Value	1
M00116	5	MLP (single layer)	Neg Pred Value	1
M00116	7	MLP (single layer)	F1	1
M00116	7	MLP (single layer)	Precision	1
M00116	7	MLP (single layer)	Recall	1
M00116	7	MLP (single layer)	Pos Pred Value	1
M00116	7	MLP (single layer)	Neg Pred Value	1
M00116	10	MLP (single layer)	F1	1
M00116	10	MLP (single layer)	Precision	1
M00116	10	MLP (single layer)	Recall	1
M00116	10	MLP (single layer)	Pos Pred Value	1
M00116	10	MLP (single layer)	Neg Pred Value	1
M00117	0.4	MLP (single layer)	F1	0.8571428571428571
M00117	0.4	MLP (single layer)	Precision	1
M00117	0.4	MLP (single layer)	Recall	0.75
M00117	0.4	MLP (single layer)	Pos Pred Value	1
M00117	0.4	MLP (single layer)	Neg Pred Value	0.967742
M00117	0.7	MLP (single layer)	F1	0.8333333333333333
M00117	0.7	MLP (single layer)	Precision	1
M00117	0.7	MLP (single layer)	Recall	0.7142857142857143
M00117	0.7	MLP (single layer)	Pos Pred Value	1
M00117	0.7	MLP (single layer)	Neg Pred Value	0.945946
M00117	1	MLP (single layer)	F1	0.8571428571428571
M00117	1	MLP (single layer)	Precision	1
M00117	1	MLP (single layer)	Recall	0.75
M00117	1	MLP (single layer)	Pos Pred Value	1
M00117	1	MLP (single layer)	Neg Pred Value	0.9473684210526316
M00117	3	MLP (single layer)	F1	0.9600000000000001
M00117	3	MLP (single layer)	Precision	0.9230769230769231
M00117	3	MLP (single layer)	Recall	1
M00117	3	MLP (single layer)	Pos Pred Value	0.9230769230769232
M00117	3	MLP (single layer)	Neg Pred Value	1
M00117	5	MLP (single layer)	F1	0.9600000000000001
M00117	5	MLP (single layer)	Precision	0.9230769230769231
M00117	5	MLP (single layer)	Recall	1
M00117	5	MLP (single layer)	Pos Pred Value	0.9230769230769232
M00117	5	MLP (single layer)	Neg Pred Value	1
M00117	7	MLP (single layer)	F1	0.9600000000000001
M00117	7	MLP (single layer)	Precision	0.9230769230769231
M00117	7	MLP (single layer)	Recall	1
M00117	7	MLP (single layer)	Pos Pred Value	0.9230769230769232
M00117	7	MLP (single layer)	Neg Pred Value	1
M00117	10	MLP (single layer)	F1	0.9600000000000001
M00117	10	MLP (single layer)	Precision	0.9230769230769231
M00117	10	MLP (single layer)	Recall	1
M00117	10	MLP (single layer)	Pos Pred Value	0.9230769230769232
M00117	10	MLP (single layer)	Neg Pred Value	1
M00118	0.4	MLP (single layer)	F1	0.7200000000000001
M00118	0.4	MLP (single layer)	Precision	0.9
M00118	0.4	MLP (single layer)	Recall	0.6
M00118	0.4	MLP (single layer)	Pos Pred Value	0.9
M00118	0.4	MLP (single layer)	Neg Pred Value	0.75
M00118	0.7	MLP (single layer)	F1	0.8108108108108107
M00118	0.7	MLP (single layer)	Precision	0.8823529411764706
M00118	0.7	MLP (single layer)	Recall	0.75
M00118	0.7	MLP (single layer)	Pos Pred Value	0.8823529411764706
M00118	0.7	MLP (single layer)	Neg Pred Value	0.8
M00118	1	MLP (single layer)	F1	0.8648648648648648
M00118	1	MLP (single layer)	Precision	1
M00118	1	MLP (single layer)	Recall	0.7619047619047619
M00118	1	MLP (single layer)	Pos Pred Value	1
M00118	1	MLP (single layer)	Neg Pred Value	0.8214285714285714
M00118	3	MLP (single layer)	F1	0.9600000000000001
M00118	3	MLP (single layer)	Precision	1
M00118	3	MLP (single layer)	Recall	0.9230769230769231
M00118	3	MLP (single layer)	Pos Pred Value	1
M00118	3	MLP (single layer)	Neg Pred Value	0.9200000000000002
M00118	5	MLP (single layer)	F1	0.9803921568627451
M00118	5	MLP (single layer)	Precision	1
M00118	5	MLP (single layer)	Recall	0.9615384615384616
M00118	5	MLP (single layer)	Pos Pred Value	1
M00118	5	MLP (single layer)	Neg Pred Value	0.9583333333333334
M00118	7	MLP (single layer)	F1	0.9803921568627451
M00118	7	MLP (single layer)	Precision	1
M00118	7	MLP (single layer)	Recall	0.9615384615384616
M00118	7	MLP (single layer)	Pos Pred Value	1
M00118	7	MLP (single layer)	Neg Pred Value	0.9583333333333334
M00118	10	MLP (single layer)	F1	0.9803921568627451
M00118	10	MLP (single layer)	Precision	1
M00118	10	MLP (single layer)	Recall	0.9615384615384616
M00118	10	MLP (single layer)	Pos Pred Value	1
M00118	10	MLP (single layer)	Neg Pred Value	0.9583333333333334
M00119	0.4	MLP (single layer)	F1	0
M00119	0.4	MLP (single layer)	Precision	0
M00119	0.4	MLP (single layer)	Recall	0
M00119	0.4	MLP (single layer)	Pos Pred Value	0
M00119	0.4	MLP (single layer)	Neg Pred Value	0.9705882352941176
M00119	0.7	MLP (single layer)	F1	0
M00119	0.7	MLP (single layer)	Precision	0
M00119	0.7	MLP (single layer)	Recall	0
M00119	0.7	MLP (single layer)	Pos Pred Value	0
M00119	0.7	MLP (single layer)	Neg Pred Value	0.925
M00119	1	MLP (single layer)	F1	0.25
M00119	1	MLP (single layer)	Precision	0.25
M00119	1	MLP (single layer)	Recall	0.25
M00119	1	MLP (single layer)	Pos Pred Value	0.25000000000000017
M00119	1	MLP (single layer)	Neg Pred Value	0.9249999999999999
M00119	3	MLP (single layer)	F1	0.7777777777777777
M00119	3	MLP (single layer)	Precision	0.7
M00119	3	MLP (single layer)	Recall	0.875
M00119	3	MLP (single layer)	Pos Pred Value	0.7000000000000002
M00119	3	MLP (single layer)	Neg Pred Value	0.9743589743589743
M00119	5	MLP (single layer)	F1	0.888889
M00119	5	MLP (single layer)	Precision	0.8
M00119	5	MLP (single layer)	Recall	1
M00119	5	MLP (single layer)	Pos Pred Value	0.7999999999999998
M00119	5	MLP (single layer)	Neg Pred Value	1
M00119	7	MLP (single layer)	F1	0.823529
M00119	7	MLP (single layer)	Precision	0.7777777777777778
M00119	7	MLP (single layer)	Recall	0.875
M00119	7	MLP (single layer)	Pos Pred Value	0.7777777777777776
M00119	7	MLP (single layer)	Neg Pred Value	0.975
M00119	10	MLP (single layer)	F1	0.888889
M00119	10	MLP (single layer)	Precision	0.8
M00119	10	MLP (single layer)	Recall	1
M00119	10	MLP (single layer)	Pos Pred Value	0.7999999999999998
M00119	10	MLP (single layer)	Neg Pred Value	1
M00120	0.4	MLP (single layer)	F1	0.8474576271186441
M00120	0.4	MLP (single layer)	Precision	1
M00120	0.4	MLP (single layer)	Recall	0.7352941176470589
M00120	0.4	MLP (single layer)	Pos Pred Value	0
M00120	0.4	MLP (single layer)	Neg Pred Value	0
M00120	0.7	MLP (single layer)	F1	0.923077
M00120	0.7	MLP (single layer)	Precision	1
M00120	0.7	MLP (single layer)	Recall	0.8571428571428571
M00120	0.7	MLP (single layer)	Pos Pred Value	0
M00120	0.7	MLP (single layer)	Neg Pred Value	0
M00120	1	MLP (single layer)	F1	0.988235
M00120	1	MLP (single layer)	Precision	1
M00120	1	MLP (single layer)	Recall	0.9767441860465116
M00120	1	MLP (single layer)	Pos Pred Value	1
M00120	1	MLP (single layer)	Neg Pred Value	0.49999999999999933
M00120	3	MLP (single layer)	F1	1
M00120	3	MLP (single layer)	Precision	1
M00120	3	MLP (single layer)	Recall	1
M00120	3	MLP (single layer)	Pos Pred Value	1
M00120	3	MLP (single layer)	Neg Pred Value	1
M00120	5	MLP (single layer)	F1	1
M00120	5	MLP (single layer)	Precision	1
M00120	5	MLP (single layer)	Recall	1
M00120	5	MLP (single layer)	Pos Pred Value	1
M00120	5	MLP (single layer)	Neg Pred Value	1
M00120	7	MLP (single layer)	F1	1
M00120	7	MLP (single layer)	Precision	1
M00120	7	MLP (single layer)	Recall	1
M00120	7	MLP (single layer)	Pos Pred Value	1
M00120	7	MLP (single layer)	Neg Pred Value	1
M00120	10	MLP (single layer)	F1	1
M00120	10	MLP (single layer)	Precision	1
M00120	10	MLP (single layer)	Recall	1
M00120	10	MLP (single layer)	Pos Pred Value	1
M00120	10	MLP (single layer)	Neg Pred Value	1
M00121	0.4	MLP (single layer)	F1	0.8400000000000001
M00121	0.4	MLP (single layer)	Precision	1
M00121	0.4	MLP (single layer)	Recall	0.7241379310344828
M00121	0.4	MLP (single layer)	Pos Pred Value	1
[truncated: 24,111 more rows]
