# Supplementary material for: Predicting metabolic modules in incomplete bacterial genomes with MetaPathPredict
Source: eLife. 2024 May 2;13:e85749. doi: 10.7554/eLife.85749 (PMC11065424; doi:10.7554/eLife.85749)
Supplement: Figure 5—source data 1. [file elife-85749-fig5-data1.xlsx]

## Sheet: Figure_5_Source_Data
Percent of sequencing reads retained	Model type	Metric	Score
0.4	MetaPathPredict	F1	0.8148148148148148
0.4	MetaPathPredict	Precision	1
0.4	MetaPathPredict	Recall	0.6875
0.4	MetaPathPredict	Pos Pred Value	1
0.4	MetaPathPredict	Neg Pred Value	0.16666666666666669
0.7	MetaPathPredict	F1	0.9333333333333333
0.7	MetaPathPredict	Precision	1
0.7	MetaPathPredict	Recall	0.875
0.7	MetaPathPredict	Pos Pred Value	1
0.7	MetaPathPredict	Neg Pred Value	0.285714
1	MetaPathPredict	F1	0.9487179487179488
1	MetaPathPredict	Precision	1
1	MetaPathPredict	Recall	0.9024390243902439
1	MetaPathPredict	Pos Pred Value	1
1	MetaPathPredict	Neg Pred Value	0.4285714285714288
3	MetaPathPredict	F1	0.9777777777777777
3	MetaPathPredict	Precision	0.9777777777777777
3	MetaPathPredict	Recall	0.9777777777777777
3	MetaPathPredict	Pos Pred Value	0.9777777777777777
3	MetaPathPredict	Neg Pred Value	0.7499999999999998
5	MetaPathPredict	F1	0.9777777777777777
5	MetaPathPredict	Precision	0.9777777777777777
5	MetaPathPredict	Recall	0.9777777777777777
5	MetaPathPredict	Pos Pred Value	0.9777777777777777
5	MetaPathPredict	Neg Pred Value	0.7499999999999998
7	MetaPathPredict	F1	0.989011
7	MetaPathPredict	Precision	0.9782608695652174
7	MetaPathPredict	Recall	1
7	MetaPathPredict	Pos Pred Value	0.9782608695652174
7	MetaPathPredict	Neg Pred Value	1
10	MetaPathPredict	F1	0.989011
10	MetaPathPredict	Precision	0.9782608695652174
10	MetaPathPredict	Recall	1
10	MetaPathPredict	Pos Pred Value	0.9782608695652174
10	MetaPathPredict	Neg Pred Value	1
0.4	Gapseq	F1	0
0.4	Gapseq	Precision	1
0.4	Gapseq	Recall	0
0.4	Gapseq	Pos Pred Value	1
0.4	Gapseq	Neg Pred Value	0.0857143
0.7	Gapseq	F1	0.0487805
0.7	Gapseq	Precision	1
0.7	Gapseq	Recall	0.025
0.7	Gapseq	Pos Pred Value	1
0.7	Gapseq	Neg Pred Value	0.0714286
1	Gapseq	F1	0.21739130434782605
1	Gapseq	Precision	1
1	Gapseq	Recall	0.12195121951219512
1	Gapseq	Pos Pred Value	1
1	Gapseq	Neg Pred Value	0.0769231
3	Gapseq	F1	0.5714285714285715
3	Gapseq	Precision	1
3	Gapseq	Recall	0.4
3	Gapseq	Pos Pred Value	1
3	Gapseq	Neg Pred Value	0.12903225806451613
5	Gapseq	F1	0.7671232876712328
5	Gapseq	Precision	1
5	Gapseq	Recall	0.6222222222222222
5	Gapseq	Pos Pred Value	1
5	Gapseq	Neg Pred Value	0.19047619047619044
7	Gapseq	F1	0.7894736842105263
7	Gapseq	Precision	0.967742
7	Gapseq	Recall	0.6666666666666666
7	Gapseq	Pos Pred Value	0.9677419354838709
7	Gapseq	Neg Pred Value	0.1666666666666666
10	Gapseq	F1	0.8205128205128205
10	Gapseq	Precision	0.9696969696969697
10	Gapseq	Recall	0.7111111111111111
10	Gapseq	Pos Pred Value	0.9696969696969696
10	Gapseq	Neg Pred Value	0.1875
