# Supplementary material for: Predicting metabolic modules in incomplete bacterial genomes with MetaPathPredict
Source: eLife. 2024 May 2;13:e85749. doi: 10.7554/eLife.85749 (PMC11065424; doi:10.7554/eLife.85749)
Supplement: Supplementary file 1. — (a) MetaPathPredict KEGG Module information. The column “Module name” contains the name of all KEGG Modules that MetaPathPredict is trained to predict; “Module number” contains the module identifier; “Module class” contains module metadata including which group of KEGG metabolism the module belongs to. (b) SHAP results for the features in MetaPathPredict’s models. The column “K number (Model 1)” contains the KEGG Ortholog gene identifier for each feature in Model 1. “Mean SHAP value (Model 1)” corresponds to the mean SHAP value for features in Model 1; highest mean SHAP values are listed at the top of the column in descending order. “KEGG Module (Model 1)” shows which KEGG module(s), if any, the features of Model 1 are present in; “Gene definition (Model 1)” contains gene annotation information for each feature in Model 1. The same column definitions are repeated for Model 2 and correspond to the same information as for Model 1. (c) Training genome metadata. The column “Genome ID” lists the names of genomes downloaded from the NCBI and GTDB databases; “Database” lists which database each genome was downloaded from (NCBI or GTDB); columns “Phylum”, “Class”, “Order”, “Family”, “Genus”, and “Species” contain the associated taxonomic information for each genome. [file elife-85749-supp1.xls]

## Sheet: Supplementary File 1a
Module name	Module number	Module class
Glycolysis (Embden-Meyerhof pathway), glucose => pyruvate	M00001	Pathway modules; Carbohydrate metabolism; Central carbohydrate metabolism
Glycolysis, core module involving three-carbon compounds	M00002	Pathway modules; Carbohydrate metabolism; Central carbohydrate metabolism
Gluconeogenesis, oxaloacetate => fructose-6P	M00003	Pathway modules; Carbohydrate metabolism; Central carbohydrate metabolism
Pentose phosphate pathway (Pentose phosphate cycle)	M00004	Pathway modules; Carbohydrate metabolism; Central carbohydrate metabolism
PRPP biosynthesis, ribose 5P => PRPP	M00005	Pathway modules; Carbohydrate metabolism; Central carbohydrate metabolism
Pentose phosphate pathway, oxidative phase, glucose 6P => ribulose 5P	M00006	Pathway modules; Carbohydrate metabolism; Central carbohydrate metabolism
Pentose phosphate pathway, non-oxidative phase, fructose 6P => ribose 5P	M00007	Pathway modules; Carbohydrate metabolism; Central carbohydrate metabolism
Entner-Doudoroff pathway, glucose-6P => glyceraldehyde-3P + pyruvate	M00008	Pathway modules; Carbohydrate metabolism; Central carbohydrate metabolism
Citrate cycle (TCA cycle, Krebs cycle)	M00009	Pathway modules; Carbohydrate metabolism; Central carbohydrate metabolism
Citrate cycle, first carbon oxidation, oxaloacetate => 2-oxoglutarate	M00010	Pathway modules; Carbohydrate metabolism; Central carbohydrate metabolism
Citrate cycle, second carbon oxidation, 2-oxoglutarate => oxaloacetate	M00011	Pathway modules; Carbohydrate metabolism; Central carbohydrate metabolism
Glyoxylate cycle	M00012	Pathway modules; Carbohydrate metabolism; Other carbohydrate metabolism
Proline biosynthesis, glutamate => proline	M00015	Pathway modules; Amino acid metabolism; Arginine and proline metabolism
Lysine biosynthesis, succinyl-DAP pathway, aspartate => lysine	M00016	Pathway modules; Amino acid metabolism; Lysine metabolism
Methionine biosynthesis, aspartate => homoserine => methionine	M00017	Pathway modules; Amino acid metabolism; Cysteine and methionine metabolism
Threonine biosynthesis, aspartate => homoserine => threonine	M00018	Pathway modules; Amino acid metabolism; Serine and threonine metabolism
Valine/isoleucine biosynthesis, pyruvate => valine / 2-oxobutanoate => isoleucine	M00019	Pathway modules; Amino acid metabolism; Branched-chain amino acid metabolism
Serine biosynthesis, glycerate-3P => serine	M00020	Pathway modules; Amino acid metabolism; Serine and threonine metabolism
Cysteine biosynthesis, serine => cysteine	M00021	Pathway modules; Amino acid metabolism; Cysteine and methionine metabolism
Shikimate pathway, phosphoenolpyruvate + erythrose-4P => chorismate	M00022	Pathway modules; Amino acid metabolism; Aromatic amino acid metabolism
Tryptophan biosynthesis, chorismate => tryptophan	M00023	Pathway modules; Amino acid metabolism; Aromatic amino acid metabolism
Phenylalanine biosynthesis, chorismate => phenylpyruvate => phenylalanine	M00024	Pathway modules; Amino acid metabolism; Aromatic amino acid metabolism
Tyrosine biosynthesis, chorismate => HPP => tyrosine	M00025	Pathway modules; Amino acid metabolism; Aromatic amino acid metabolism
Histidine biosynthesis, PRPP => histidine	M00026	Pathway modules; Amino acid metabolism; Histidine metabolism
GABA (gamma-Aminobutyrate) shunt	M00027	Pathway modules; Amino acid metabolism; Other amino acid metabolism
Ornithine biosynthesis, glutamate => ornithine	M00028	Pathway modules; Amino acid metabolism; Arginine and proline metabolism
Ectoine biosynthesis, aspartate => ectoine	M00033	Pathway modules; Amino acid metabolism; Serine and threonine metabolism
Methionine salvage pathway	M00034	Pathway modules; Amino acid metabolism; Cysteine and methionine metabolism
Methionine degradation	M00035	Pathway modules; Amino acid metabolism; Cysteine and methionine metabolism
Leucine degradation, leucine => acetoacetate + acetyl-CoA	M00036	Pathway modules; Amino acid metabolism; Branched-chain amino acid metabolism
Tryptophan metabolism, tryptophan => kynurenine => 2-aminomuconate	M00038	Pathway modules; Amino acid metabolism; Aromatic amino acid metabolism
Tyrosine degradation, tyrosine => homogentisate	M00044	Pathway modules; Amino acid metabolism; Aromatic amino acid metabolism
Histidine degradation, histidine => N-formiminoglutamate => glutamate	M00045	Pathway modules; Amino acid metabolism; Histidine metabolism
Pyrimidine degradation, uracil => beta-alanine, thymine => 3-aminoisobutanoate	M00046	Pathway modules; Nucleotide metabolism; Pyrimidine metabolism
De novo purine biosynthesis, PRPP + glutamine => IMP	M00048	Pathway modules; Nucleotide metabolism; Purine metabolism
Adenine ribonucleotide biosynthesis, IMP => ADP,ATP	M00049	Pathway modules; Nucleotide metabolism; Purine metabolism
Guanine ribonucleotide biosynthesis, IMP => GDP,GTP	M00050	Pathway modules; Nucleotide metabolism; Purine metabolism
De novo pyrimidine biosynthesis, glutamine (+ PRPP) => UMP	M00051	Pathway modules; Nucleotide metabolism; Pyrimidine metabolism
Pyrimidine ribonucleotide biosynthesis, UMP => UDP/UTP,CDP/CTP	M00052	Pathway modules; Nucleotide metabolism; Pyrimidine metabolism
Deoxyribonucleotide biosynthesis, ADP/GDP/CDP/UDP => dATP/dGTP/dCTP/dUTP	M00053	Pathway modules; Nucleotide metabolism; Purine metabolism
KDO2-lipid A biosynthesis, Raetz pathway, LpxL-LpxM type	M00060	Pathway modules; Glycan metabolism; Lipopolysaccharide metabolism
D-Glucuronate degradation, D-glucuronate => pyruvate + D-glyceraldehyde 3P	M00061	Pathway modules; Carbohydrate metabolism; Other carbohydrate metabolism
CMP-KDO biosynthesis	M00063	Pathway modules; Glycan metabolism; Lipopolysaccharide metabolism
ADP-L-glycero-D-manno-heptose biosynthesis	M00064	Pathway modules; Glycan metabolism; Lipopolysaccharide metabolism
Fatty acid biosynthesis, initiation	M00082	Pathway modules; Lipid metabolism; Fatty acid metabolism
Fatty acid biosynthesis, elongation	M00083	Pathway modules; Lipid metabolism; Fatty acid metabolism
beta-Oxidation, acyl-CoA synthesis	M00086	Pathway modules; Lipid metabolism; Fatty acid metabolism
beta-Oxidation	M00087	Pathway modules; Lipid metabolism; Fatty acid metabolism
Phosphatidylcholine (PC) biosynthesis, PE => PC	M00091	Pathway modules; Lipid metabolism; Lipid metabolism
Phosphatidylethanolamine (PE) biosynthesis, PA => PS => PE	M00093	Pathway modules; Lipid metabolism; Lipid metabolism
C5 isoprenoid biosynthesis, mevalonate pathway	M00095	Pathway modules; Biosynthesis of terpenoids and polyketides; Terpenoid backbone biosynthesis
C5 isoprenoid biosynthesis, non-mevalonate pathway	M00096	Pathway modules; Biosynthesis of terpenoids and polyketides; Terpenoid backbone biosynthesis
Acylglycerol degradation	M00098	Pathway modules; Lipid metabolism; Lipid metabolism
Tocopherol/tocotorienol biosynthesis, homogentisate + phytyl/geranylgeranyl-PP => tocopherol/tocotorienol	M00112	Pathway modules; Metabolism of cofactors and vitamins; Cofactor and vitamin metabolism
NAD biosynthesis, aspartate => quinolinate => NAD	M00115	Pathway modules; Metabolism of cofactors and vitamins; Cofactor and vitamin metabolism
Menaquinone biosynthesis, chorismate (+ polyprenyl-PP) => menaquinol	M00116	Pathway modules; Metabolism of cofactors and vitamins; Cofactor and vitamin metabolism
Ubiquinone biosynthesis, prokaryotes, chorismate (+ polyprenyl-PP) => ubiquinol	M00117	Pathway modules; Metabolism of cofactors and vitamins; Cofactor and vitamin metabolism
Glutathione biosynthesis, glutamate => glutathione	M00118	Pathway modules; Amino acid metabolism; Other amino acid metabolism
Pantothenate biosynthesis, valine/L-aspartate => pantothenate	M00119	Pathway modules; Metabolism of cofactors and vitamins; Cofactor and vitamin metabolism
Coenzyme A biosynthesis, pantothenate => CoA	M00120	Pathway modules; Metabolism of cofactors and vitamins; Cofactor and vitamin metabolism
Heme biosynthesis, plants and bacteria, glutamate => heme	M00121	Pathway modules; Metabolism of cofactors and vitamins; Cofactor and vitamin metabolism
Cobalamin biosynthesis, cobyrinate a,c-diamide => cobalamin	M00122	Pathway modules; Metabolism of cofactors and vitamins; Cofactor and vitamin metabolism
Biotin biosynthesis, pimeloyl-ACP/CoA => biotin	M00123	Pathway modules; Metabolism of cofactors and vitamins; Cofactor and vitamin metabolism
Riboflavin biosynthesis, plants and bacteria, GTP => riboflavin/FMN/FAD	M00125	Pathway modules; Metabolism of cofactors and vitamins; Cofactor and vitamin metabolism
Tetrahydrofolate biosynthesis, GTP => THF	M00126	Pathway modules; Metabolism of cofactors and vitamins; Cofactor and vitamin metabolism
Thiamine biosynthesis, prokaryotes, AIR (+ DXP/tyrosine) => TMP/TPP	M00127	Pathway modules; Metabolism of cofactors and vitamins; Cofactor and vitamin metabolism
Polyamine biosynthesis, arginine => agmatine => putrescine => spermidine	M00133	Pathway modules; Amino acid metabolism; Polyamine biosynthesis
Polyamine biosynthesis, arginine => ornithine => putrescine	M00134	Pathway modules; Amino acid metabolism; Polyamine biosynthesis
GABA biosynthesis, eukaryotes, putrescine => GABA	M00135	Pathway modules; Amino acid metabolism; Polyamine biosynthesis
C1-unit interconversion, prokaryotes	M00140	Pathway modules; Metabolism of cofactors and vitamins; Cofactor and vitamin metabolism
NADH:quinone oxidoreductase, prokaryotes	M00144	Pathway modules; Energy metabolism; ATP synthesis
Succinate dehydrogenase, prokaryotes	M00149	Pathway modules; Energy metabolism; ATP synthesis
Cytochrome bc1 complex respiratory unit	M00151	Pathway modules; Energy metabolism; ATP synthesis
Cytochrome bd ubiquinol oxidase	M00153	Pathway modules; Energy metabolism; ATP synthesis
Cytochrome c oxidase, prokaryotes	M00155	Pathway modules; Energy metabolism; ATP synthesis
Cytochrome c oxidase, cbb3-type	M00156	Pathway modules; Energy metabolism; ATP synthesis
F-type ATPase, prokaryotes and chloroplasts	M00157	Pathway modules; Energy metabolism; ATP synthesis
V/A-type ATPase, prokaryotes	M00159	Pathway modules; Energy metabolism; ATP synthesis
Photosystem II	M00161	Pathway modules; Energy metabolism; Photosynthesis
Photosystem I	M00163	Pathway modules; Energy metabolism; Photosynthesis
Reductive pentose phosphate cycle (Calvin cycle)	M00165	Pathway modules; Energy metabolism; Carbon fixation
Reductive pentose phosphate cycle, ribulose-5P => glyceraldehyde-3P	M00166	Pathway modules; Energy metabolism; Carbon fixation
Reductive pentose phosphate cycle, glyceraldehyde-3P => ribulose-5P	M00167	Pathway modules; Energy metabolism; Carbon fixation
CAM (Crassulacean acid metabolism), dark	M00168	Pathway modules; Energy metabolism; Carbon fixation
CAM (Crassulacean acid metabolism), light	M00169	Pathway modules; Energy metabolism; Carbon fixation
Methane oxidation, methanotroph, methane => formaldehyde	M00174	Pathway modules; Energy metabolism; Methane metabolism
Nitrogen fixation, nitrogen => ammonia	M00175	Pathway modules; Energy metabolism; Nitrogen metabolism
Assimilatory sulfate reduction, sulfate => H2S	M00176	Pathway modules; Energy metabolism; Sulfur metabolism
Pyruvate oxidation, pyruvate => acetyl-CoA	M00307	Pathway modules; Carbohydrate metabolism; Central carbohydrate metabolism
Semi-phosphorylative Entner-Doudoroff pathway, gluconate => glycerate-3P	M00308	Pathway modules; Carbohydrate metabolism; Central carbohydrate metabolism
Formaldehyde assimilation, ribulose monophosphate pathway	M00345	Pathway modules; Energy metabolism; Methane metabolism
EHEC pathogenicity signature, Shiga toxin	M00363	Signature modules; Gene set; Pathogenicity
C10-C20 isoprenoid biosynthesis, bacteria	M00364	Pathway modules; Biosynthesis of terpenoids and polyketides; Terpenoid backbone biosynthesis
C10-C20 isoprenoid biosynthesis, archaea	M00365	Pathway modules; Biosynthesis of terpenoids and polyketides; Terpenoid backbone biosynthesis
F420 biosynthesis, archaea	M00378	Pathway modules; Energy metabolism; Methane metabolism
Cytochrome aa3-600 menaquinol oxidase	M00416	Pathway modules; Energy metabolism; ATP synthesis
Cytochrome o ubiquinol oxidase	M00417	Pathway modules; Energy metabolism; ATP synthesis
Leucine biosynthesis, 2-oxoisovalerate => 2-oxoisocaproate	M00432	Pathway modules; Amino acid metabolism; Branched-chain amino acid metabolism
Lysine biosynthesis, acetyl-DAP pathway, aspartate => lysine	M00525	Pathway modules; Amino acid metabolism; Lysine metabolism
Lysine biosynthesis, DAP dehydrogenase pathway, aspartate => lysine	M00526	Pathway modules; Amino acid metabolism; Lysine metabolism
Lysine biosynthesis, DAP aminotransferase pathway, aspartate => lysine	M00527	Pathway modules; Amino acid metabolism; Lysine metabolism
Nitrification, ammonia => nitrite	M00528	Pathway modules; Energy metabolism; Nitrogen metabolism
Denitrification, nitrate => nitrogen	M00529	Pathway modules; Energy metabolism; Nitrogen metabolism
Dissimilatory nitrate reduction, nitrate => ammonia	M00530	Pathway modules; Energy metabolism; Nitrogen metabolism
Assimilatory nitrate reduction, nitrate => ammonia	M00531	Pathway modules; Energy metabolism; Nitrogen metabolism
Homoprotocatechuate degradation, homoprotocatechuate => 2-oxohept-3-enedioate	M00533	Pathway modules; Amino acid metabolism; Aromatic amino acid metabolism
Isoleucine biosynthesis, pyruvate => 2-oxobutanoate	M00535	Pathway modules; Amino acid metabolism; Branched-chain amino acid metabolism
Trans-cinnamate degradation, trans-cinnamate => acetyl-CoA	M00545	Pathway modules; Xenobiotics biodegradation; Aromatics degradation
Purine degradation, xanthine => urea	M00546	Pathway modules; Nucleotide metabolism; Purine metabolism
Benzene degradation, benzene => catechol	M00548	Pathway modules; Xenobiotics biodegradation; Aromatics degradation
Nucleotide sugar biosynthesis, glucose => UDP-glucose	M00549	Pathway modules; Carbohydrate metabolism; Other carbohydrate metabolism
Ascorbate degradation, ascorbate => D-xylulose-5P	M00550	Pathway modules; Carbohydrate metabolism; Other carbohydrate metabolism
Benzoate degradation, benzoate => catechol / methylbenzoate => methylcatechol	M00551	Pathway modules; Xenobiotics biodegradation; Aromatics degradation
D-galactonate degradation, De Ley-Doudoroff pathway, D-galactonate => glycerate-3P	M00552	Pathway modules; Carbohydrate metabolism; Other carbohydrate metabolism
Nucleotide sugar biosynthesis, galactose => UDP-galactose	M00554	Pathway modules; Carbohydrate metabolism; Other carbohydrate metabolism
Betaine biosynthesis, choline => betaine	M00555	Pathway modules; Amino acid metabolism; Serine and threonine metabolism
Trehalose biosynthesis, D-glucose 1P => trehalose	M00565	Pathway modules; Carbohydrate metabolism; Other carbohydrate metabolism
Catechol ortho-cleavage, catechol => 3-oxoadipate	M00568	Pathway modules; Xenobiotics biodegradation; Aromatics degradation
Catechol meta-cleavage, catechol => acetyl-CoA / 4-methylcatechol => propanoyl-CoA	M00569	Pathway modules; Xenobiotics biodegradation; Aromatics degradation
Isoleucine biosynthesis, threonine => 2-oxobutanoate => isoleucine	M00570	Pathway modules; Amino acid metabolism; Branched-chain amino acid metabolism
Pimeloyl-ACP biosynthesis, BioC-BioH pathway, malonyl-ACP => pimeloyl-ACP	M00572	Pathway modules; Metabolism of cofactors and vitamins; Cofactor and vitamin metabolism
Pertussis pathogenicity signature, pertussis toxin	M00574	Signature modules; Gene set; Pathogenicity
Biotin biosynthesis, BioW pathway, pimelate => pimeloyl-CoA => biotin	M00577	Pathway modules; Metabolism of cofactors and vitamins; Cofactor and vitamin metabolism
Phosphate acetyltransferase-acetate kinase pathway, acetyl-CoA => acetate	M00579	Pathway modules; Energy metabolism; Carbon fixation
Pentose phosphate pathway, archaea, fructose 6P => ribose 5P	M00580	Pathway modules; Carbohydrate metabolism; Central carbohydrate metabolism
Thiosulfate oxidation by SOX complex, thiosulfate => sulfate	M00595	Pathway modules; Energy metabolism; Sulfur metabolism
Dissimilatory sulfate reduction, sulfate => H2S	M00596	Pathway modules; Energy metabolism; Sulfur metabolism
Anoxygenic photosystem II	M00597	Pathway modules; Energy metabolism; Photosynthesis
Nicotinate degradation, nicotinate => fumarate	M00622	Pathway modules; Metabolism of cofactors and vitamins; Cofactor and vitamin metabolism
Phthalate degradation, phthalate => protocatechuate	M00623	Pathway modules; Xenobiotics biodegradation; Aromatics degradation
beta-Lactam resistance, Bla system	M00627	Signature modules; Gene set; Drug resistance
D-Galacturonate degradation (bacteria), D-galacturonate => pyruvate + D-glyceraldehyde 3P	M00631	Pathway modules; Carbohydrate metabolism; Other carbohydrate metabolism
Galactose degradation, Leloir pathway, galactose => alpha-D-glucose-1P	M00632	Pathway modules; Carbohydrate metabolism; Other carbohydrate metabolism
Anthranilate degradation, anthranilate => catechol	M00637	Pathway modules; Xenobiotics biodegradation; Aromatics degradation
Salicylate degradation, salicylate => gentisate	M00638	Pathway modules; Xenobiotics biodegradation; Aromatics degradation
Multidrug resistance, efflux pump MexEF-OprN	M00641	Signature modules; Gene set; Drug resistance
Multidrug resistance, efflux pump MexJK-OprM	M00642	Signature modules; Gene set; Drug resistance
Multidrug resistance, efflux pump MexXY-OprM	M00643	Signature modules; Gene set; Drug resistance
Multidrug resistance, efflux pump AdeABC	M00649	Signature modules; Gene set; Drug resistance
Xanthomonas spp. pathogenicity signature, T3SS and effectors	M00660	Signature modules; Gene set; Plant pathogenicity
Multidrug resistance, efflux pump BpeEF-OprC	M00698	Signature modules; Gene set; Drug resistance
Multidrug resistance, efflux pump AbcA	M00700	Signature modules; Gene set; Drug resistance
Multidrug resistance, efflux pump NorB	M00702	Signature modules; Gene set; Drug resistance
Tetracycline resistance, efflux pump Tet38	M00704	Signature modules; Gene set; Drug resistance
Multidrug resistance, efflux pump MepA	M00705	Signature modules; Gene set; Drug resistance
Multidrug resistance, efflux pump MexAB-OprM	M00718	Signature modules; Gene set; Drug resistance
Cationic antimicrobial peptide (CAMP) resistance, dltABCD operon	M00725	Signature modules; Gene set; Drug resistance
Cationic antimicrobial peptide (CAMP) resistance, lysyl-phosphatidylglycerol (L-PG) synthase MprF	M00726	Signature modules; Gene set; Drug resistance
Cationic antimicrobial peptide (CAMP) resistance, VraFG transporter	M00730	Signature modules; Gene set; Drug resistance
Propanoyl-CoA metabolism, propanoyl-CoA => succinyl-CoA	M00741	Pathway modules; Carbohydrate metabolism; Other carbohydrate metabolism
Imipenem resistance, repression of porin OprD	M00745	Signature modules; Gene set; Drug resistance
Undecaprenylphosphate alpha-L-Ara4N biosynthesis, UDP-GlcA => undecaprenyl phosphate alpha-L-Ara4N	M00761	Pathway modules; Carbohydrate metabolism; Other carbohydrate metabolism
Multidrug resistance, efflux pump MexPQ-OpmE	M00769	Signature modules; Gene set; Drug resistance
Type II polyketide backbone biosynthesis, acyl-CoA + malonyl-CoA => polyketide	M00778	Pathway modules; Biosynthesis of terpenoids and polyketides; Type II polyketide biosynthesis
Bacilysin biosynthesis, prephenate => bacilysin	M00787	Pathway modules; Biosynthesis of other secondary metabolites; Biosynthesis of other antibiotics
Pyrrolnitrin biosynthesis, tryptophan => pyrrolnitrin	M00790	Pathway modules; Biosynthesis of other secondary metabolites; Biosynthesis of other bacterial compounds
dTDP-L-rhamnose biosynthesis	M00793	Pathway modules; Biosynthesis of terpenoids and polyketides; Polyketide sugar unit biosynthesis
9-membered enediyne core biosynthesis, malonyl-CoA => 3-hydroxyhexadeca-4,6,8,10,12,14-hexaenoyl-ACP => 9-membered enediyne core	M00824	Pathway modules; Biosynthesis of terpenoids and polyketides; Enediyne biosynthesis
Prodigiosin biosynthesis, L-proline => prodigiosin	M00837	Pathway modules; Biosynthesis of other secondary metabolites; Biosynthesis of other bacterial compounds
Arginine biosynthesis, ornithine => arginine	M00844	Pathway modules; Amino acid metabolism; Arginine and proline metabolism
Siroheme biosynthesis, glutamyl-tRNA => siroheme	M00846	Pathway modules; Metabolism of cofactors and vitamins; Cofactor and vitamin metabolism
Heme biosynthesis, archaea, siroheme => heme	M00847	Pathway modules; Metabolism of cofactors and vitamins; Cofactor and vitamin metabolism
Carbapenem resistance	M00851	Signature modules; Gene set; Drug resistance
Glycogen biosynthesis, glucose-1P => glycogen/starch	M00854	Pathway modules; Carbohydrate metabolism; Other carbohydrate metabolism
Glycogen degradation, glycogen => glucose-6P	M00855	Pathway modules; Carbohydrate metabolism; Other carbohydrate metabolism
Salmonella enterica pathogenicity signature, typhoid toxin	M00856	Signature modules; Gene set; Pathogenicity
KDO2-lipid A biosynthesis, Raetz pathway, non-LpxL-LpxM type	M00866	Pathway modules; Glycan metabolism; Lipopolysaccharide metabolism
KDO2-lipid A modification pathway	M00867	Pathway modules; Glycan metabolism; Lipopolysaccharide metabolism
Staphyloferrin B biosynthesis, L-serine => staphyloferrin B	M00875	Pathway modules; Biosynthesis of other secondary metabolites; Biosynthesis of other bacterial compounds
Staphyloferrin A biosynthesis, L-ornithine => staphyloferrin A	M00876	Pathway modules; Biosynthesis of other secondary metabolites; Biosynthesis of other bacterial compounds
Kanosamine biosynthesis, glucose 6-phosphate => kanosamine	M00877	Pathway modules; Biosynthesis of other secondary metabolites; Biosynthesis of other antibiotics
Molybdenum cofactor biosynthesis, GTP => molybdenum cofactor	M00880	Pathway modules; Metabolism of cofactors and vitamins; Cofactor and vitamin metabolism
Lipoic acid biosynthesis, plants and bacteria, octanoyl-ACP => dihydrolipoyl-E2/H	M00881	Pathway modules; Metabolism of cofactors and vitamins; Cofactor and vitamin metabolism
Lipoic acid biosynthesis, animals and bacteria, octanoyl-ACP => dihydrolipoyl-H => dihydrolipoyl-E2	M00883	Pathway modules; Metabolism of cofactors and vitamins; Cofactor and vitamin metabolism
Thiamine biosynthesis, prokaryotes, AIR (+ DXP/glycine) => TMP/TPP	M00895	Pathway modules; Metabolism of cofactors and vitamins; Cofactor and vitamin metabolism
Thiamine biosynthesis, archaea, AIR (+ NAD+) => TMP/TPP	M00896	Pathway modules; Metabolism of cofactors and vitamins; Cofactor and vitamin metabolism
Thiamine salvage pathway, HMP/HET => TMP	M00899	Pathway modules; Metabolism of cofactors and vitamins; Cofactor and vitamin metabolism
UDP-N-acetyl-D-glucosamine biosynthesis, prokaryotes, glucose => UDP-GlcNAc	M00909	Pathway modules; Carbohydrate metabolism; Other carbohydrate metabolism
NAD biosynthesis, tryptophan => quinolinate => NAD	M00912	Pathway modules; Metabolism of cofactors and vitamins; Cofactor and vitamin metabolism
Pyridoxal-P biosynthesis, R5P + glyceraldehyde-3P + glutamine => pyridoxal-P	M00916	Pathway modules; Metabolism of cofactors and vitamins; Cofactor and vitamin metabolism
Aerobactin biosynthesis, lysine => aerobactin	M00918	Pathway modules; Biosynthesis of other secondary metabolites; Biosynthesis of other bacterial compounds
Cobalamin biosynthesis, anaerobic, uroporphyrinogen III => sirohydrochlorin => cobyrinate a,c-diamide	M00924	Pathway modules; Metabolism of cofactors and vitamins; Cofactor and vitamin metabolism
Heme biosynthesis, bacteria, glutamyl-tRNA => coproporphyrin III => heme	M00926	Pathway modules; Metabolism of cofactors and vitamins; Cofactor and vitamin metabolism
Menaquinone biosynthesis, futalosine pathway	M00930	Pathway modules; Metabolism of cofactors and vitamins; Cofactor and vitamin metabolism
Phylloquinone biosynthesis, chorismate (+ phytyl-PP) => phylloquinol	M00932	Pathway modules; Metabolism of cofactors and vitamins; Cofactor and vitamin metabolism
Pyrimidine deoxyribonucleotide biosynthesis, UDP => dTTP	M00938	Pathway modules; Nucleotide metabolism; Pyrimidine metabolism
Pyrimidine degradation, uracil => 3-hydroxypropanoate	M00939	Pathway modules; Nucleotide metabolism; Pyrimidine metabolism
D-Arginine racemization, D-arginine => L-arginine	M00947	Pathway modules; Amino acid metabolism; Other amino acid metabolism
Hydroxyproline degradation, trans-4-hydroxy-L-proline => 2-oxoglutarate	M00948	Pathway modules; Amino acid metabolism; Other amino acid metabolism
Staphylopine biosynthesis, L-histidine => staphylopine	M00949	Pathway modules; Amino acid metabolism; Other amino acid metabolism

## Sheet: Supplementary File 1b
#Model 1 (Modules in ≥10% and ≤90% of training data)				#Model 2 (Modules in <10% or >90% of training data)
K number (Model 1)	Mean SHAP value (Model 1)	KEGG Module (Model 1)	Gene definition (Model 1)	K number (Model 2)	Mean SHAP value (Model 2)	KEGG Module (Model 2)	Gene definition (Model 2)
K03406	0.258085	NA	methyl-accepting chemotaxis protein	K02172	0.0389801	M00627	bla regulator protein blaR1
K00130	0.193629	M00555	betaine-aldehyde dehydrogenase [EC:1.2.1.8]	K18093	0.0361697	M00745	imipenem/basic amino acid-specific outer membrane pore [EC:3.4.21.-]
K01580	0.190957	M00027	glutamate decarboxylase [EC:4.1.1.15]	K03895	0.0350675	M00918	aerobactin synthase [EC:6.3.2.39]
K07345	0.178283	NA	major type 1 subunit fimbrin (pilin)	K03894	0.0335903	M00918	N2-citryl-N6-acetyl-N6-hydroxylysine synthase [EC:6.3.2.38]
K18320	0.173314	NA	transposase, IS6 family	K08093	0.0305205	M00345	3-hexulose-6-phosphate synthase [EC:4.1.2.43]
K01684	0.173204	M00552	galactonate dehydratase [EC:4.2.1.6]	K08093	0.0305205	M00580	3-hexulose-6-phosphate synthase [EC:4.1.2.43]
K02014	0.169697	NA	iron complex outermembrane recepter protein	K03406	0.0304677	NA	methyl-accepting chemotaxis protein
K00151	0.155054	M00533	5-carboxymethyl-2-hydroxymuconic-semialdehyde dehydrogenase [EC:1.2.1.60]	K17722	0.0269153	NA	dihydropyrimidine dehydrogenase (NAD+) subunit PreT [EC:1.3.1.1]
K21023	0.145093	NA	diguanylate cyclase [EC:2.7.7.65]	K21493	0.0247326	NA	toxin YxiD [EC:3.1.-.-]
K00845	0.132769	M00001	glucokinase [EC:2.7.1.2]	K05714	0.0244631	M00545	2-hydroxy-6-oxonona-2,4-dienedioate hydrolase [EC:3.7.1.14]
K00845	0.132769	M00549	glucokinase [EC:2.7.1.2]	K11038	0.0233982	NA	leukocidin/hemolysin toxin family protein
K00845	0.132769	M00909	glucokinase [EC:2.7.1.2]	K07480	0.0233459	NA	insertion element IS1 protein InsB
K07347	0.132469	NA	outer membrane usher protein	K05549	0.0207048	NA	benzoate/toluate 1,2-dioxygenase subunit alpha [EC:1.14.12.10 1.14.12.-]
K19776	0.12947	NA	GntR family transcriptional regulator, galactonate operon transcriptional repressor	K08094	0.0197569	M00345	6-phospho-3-hexuloisomerase [EC:5.3.1.27]
K00108	0.129287	M00555	choline dehydrogenase [EC:1.1.99.1]	K08094	0.0197569	M00580	6-phospho-3-hexuloisomerase [EC:5.3.1.27]
K09476	0.12809	NA	outer membrane pore protein F	K05784	0.0196582	NA	benzoate/toluate 1,2-dioxygenase reductase component [EC:1.18.1.-]
K07483	0.127935	NA	transposase	K09699	0.019634	M00036	2-oxoisovalerate dehydrogenase E2 component (dihydrolipoyl transacylase) [EC:2.3.1.168]
K00652	0.124091	M00123	8-amino-7-oxononanoate synthase [EC:2.3.1.47]	K06718	0.0192051	M00033	L-2,4-diaminobutyric acid acetyltransferase [EC:2.3.1.178]
K01631	0.122827	M00552	2-dehydro-3-deoxyphosphogalactonate aldolase [EC:4.1.2.21]	K05783	0.0186191	M00551	dihydroxycyclohexadiene carboxylate dehydrogenase [EC:1.3.1.25 1.3.1.-]
K00883	0.1218	M00552	2-dehydro-3-deoxygalactonokinase [EC:2.7.1.58]	K06044	0.018093	M00565	(1->4)-alpha-D-glucan 1-alpha-D-glucosylmutase [EC:5.4.99.15]
K01223	0.118168	NA	6-phospho-beta-glucosidase [EC:3.2.1.86]	K07165	0.0179848	NA	transmembrane sensor
K03566	0.117841	NA	LysR family transcriptional regulator, glycine cleavage system transcriptional activator	K03566	0.0179812	NA	LysR family transcriptional regulator, glycine cleavage system transcriptional activator
K07484	0.115896	NA	transposase	K10206	0.0179307	M00527	LL-diaminopimelate aminotransferase [EC:2.6.1.83]
K18862	0.115104	NA	small toxic polypeptide LdrA/B/C/D	K02014	0.0178819	NA	iron complex outermembrane recepter protein
K11904	0.11448	NA	type VI secretion system secreted protein VgrG	K05550	0.0178283	NA	benzoate/toluate 1,2-dioxygenase subunit beta [EC:1.14.12.10 1.14.12.-]
K08194	0.111104	NA	MFS transporter, ACS family, D-galactonate transporter	K13613	0.0177734	NA	polyketide synthase PksM
K21395	0.108248	NA	TRAP-type transport system periplasmic protein	K07492	0.0173753	NA	putative transposase
K02529	0.105452	NA	LacI family transcriptional regulator	K21573	0.0171563	NA	TonB-dependent starch-binding outer membrane protein SusC
K00799	0.105118	NA	glutathione S-transferase [EC:2.5.1.18]	K21572	0.0169597	NA	starch-binding outer membrane protein, SusD/RagB family
K02761	0.102908	NA	cellobiose PTS system EIIC component	K18907	0.0159435	M00700	GntR family transcriptional regulator, regulator for abcA and norABC
K00249	0.102088	NA	acyl-CoA dehydrogenase [EC:1.3.8.7]	K18907	0.0159435	M00702	GntR family transcriptional regulator, regulator for abcA and norABC
K07497	0.101772	NA	putative transposase	K00799	0.0158059	NA	glutathione S-transferase [EC:2.5.1.18]
K02167	0.101637	NA	TetR/AcrR family transcriptional regulator, transcriptional repressor of bet genes	K00249	0.0157576	M00036	acyl-CoA dehydrogenase [EC:1.3.8.7]
K01190	0.0980783	NA	beta-galactosidase [EC:3.2.1.23]	K00249	0.0157576	M00087	acyl-CoA dehydrogenase [EC:1.3.8.7]
K02226	0.0979004	M00122	alpha-ribazole phosphatase [EC:3.1.3.73]	K03381	0.0157019	M00568	catechol 1,2-dioxygenase [EC:1.13.11.1]
K11690	0.0976282	NA	C4-dicarboxylate transporter, DctM subunit	K01856	0.0156238	M00568	muconate cycloisomerase [EC:5.5.1.1]
K07480	0.0962872	NA	insertion element IS1 protein InsB	K05308	0.0156196	M00308	gluconate/galactonate dehydratase [EC:4.2.1.140]
K00370	0.0959511	M00530	nitrate reductase / nitrite oxidoreductase, alpha subunit [EC:1.7.5.1 1.7.99.-]	K00836	0.015504	M00033	diaminobutyrate-2-oxoglutarate transaminase [EC:2.6.1.76]
K16079	0.0954452	NA	outer membrane immunogenic protein	K18908	0.0154318	M00705	multidrug efflux pump
K05921	0.0953975	M00533	5-oxopent-3-ene-1,2,5-tricarboxylate decarboxylase / 2-hydroxyhepta-2,4-diene-1,7-dioate isomerase [EC:4.1.1.68 5.3.3.-]	K11040	0.0153778	NA	staphylococcal enterotoxin
K02438	0.0939756	M00855	glycogen debranching enzyme [EC:3.2.1.196]	K01965	0.0152879	M00741	propionyl-CoA carboxylase alpha chain [EC:6.4.1.3]
K10011	0.0931986	M00761	UDP-4-amino-4-deoxy-L-arabinose formyltransferase / UDP-glucuronic acid dehydrogenase (UDP-4-keto-hexauronic acid decarboxylating) [EC:2.1.2.13 1.1.1.305]	K03285	0.0150807	NA	general bacterial porin, GBP family
K01823	0.0914058	M00096	isopentenyl-diphosphate Delta-isomerase [EC:5.3.3.2]	K07498	0.0149858	NA	putative transposase
K01823	0.0914058	M00364	isopentenyl-diphosphate Delta-isomerase [EC:5.3.3.2]	K07345	0.0149462	NA	major type 1 subunit fimbrin (pilin)
K04027	0.0913252	NA	ethanolamine utilization protein EutM	K01236	0.0148424	M00565	maltooligosyltrehalose trehalohydrolase [EC:3.2.1.141]
K21405	0.0910003	NA	sigma-54 dependent transcriptional regulator, acetoin dehydrogenase operon transcriptional activator AcoR	K11904	0.0147217	NA	type VI secretion system secreted protein VgrG
K00484	0.0902087	NA	flavin reductase (NADH) [EC:1.5.1.36]	K06720	0.0146819	M00033	L-ectoine synthase [EC:4.2.1.108]
K02298	0.0889689	M00417	cytochrome o ubiquinol oxidase subunit I [EC:7.1.1.3]	K07795	0.0145598	NA	putative tricarboxylic transport membrane protein
K07806	0.0881534	M00761	UDP-4-amino-4-deoxy-L-arabinose-oxoglutarate aminotransferase [EC:2.6.1.87]	K21488	0.0143337	NA	antitoxin YobK
K00849	0.0878087	M00554	galactokinase [EC:2.7.1.6]	K13615	0.0142772	NA	polyketide synthase PksR
K00849	0.0878087	M00632	galactokinase [EC:2.7.1.6]	K21395	0.0140981	NA	TRAP-type transport system periplasmic protein
K16088	0.0875785	NA	outer-membrane receptor for ferric coprogen and ferric-rhodotorulic acid	K00274	0.0140045	M00135	monoamine oxidase [EC:1.4.3.4]
K02509	0.0874395	NA	2-oxo-hept-3-ene-1,7-dioate hydratase [EC:4.2.1.-]	K18145	0.0139078	M00649	membrane fusion protein, multidrug efflux system
K03292	0.0874303	NA	glycoside/pentoside/hexuronide:cation symporter, GPH family	K03340	0.0138757	M00526	diaminopimelate dehydrogenase [EC:1.4.1.16]
K02791	0.0860415	NA	maltose/glucose PTS system EIICB component [EC:2.7.1.199 2.7.1.208]	K14193	0.0138671	NA	iron-regulated surface determinant protein A
K06908	0.0855129	NA	uncharacterized protein	K09011	0.0137894	M00535	(R)-citramalate synthase [EC:2.3.1.182]
K02168	0.0852452	NA	choline/glycine/proline betaine transport protein	K21023	0.0137645	NA	diguanylate cyclase [EC:2.7.7.65]
K13633	0.0851359	NA	AraC family transcriptional regulator, transcriptional activator FtrA	K01692	0.0137516	M00087	enoyl-CoA hydratase [EC:4.2.1.17]
K03476	0.0846753	M00550	L-ascorbate 6-phosphate lactonase [EC:3.1.1.-]	K07093	0.0136509	NA	uncharacterized protein
K03475	0.084633	M00550	ascorbate PTS system EIIC component	K18303	0.0136503	M00642	multidrug efflux pump
K00424	0.0843802	M00153	cytochrome bd-I ubiquinol oxidase subunit X [EC:7.1.1.7]	K08170	0.0135738	M00702	MFS transporter, DHA2 family, multidrug resistance protein
K06907	0.0831967	NA	uncharacterized protein	K22296	0.0135115	NA	MarR family transcriptional regulator, lower aerobic nicotinate degradation pathway regulator
K01826	0.0828223	M00533	5-carboxymethyl-2-hydroxymuconate isomerase [EC:5.3.3.10]	K13877	0.0135109	M00948	2,5-dioxopentanoate dehydrogenase [EC:1.2.1.26]
K23107	0.0823762	NA	1-deoxyxylulose-5-phosphate synthase [EC:1.1.-.-]	K01999	0.013447	NA	branched-chain amino acid transport system substrate-binding protein
K03077	0.0823127	M00550	L-ribulose-5-phosphate 4-epimerase [EC:5.1.3.4]	K01966	0.013352	M00741	propionyl-CoA carboxylase beta chain [EC:6.4.1.3 2.1.3.15]
K19048	0.0817446	NA	toxic protein SymE	K03464	0.0133469	M00568	muconolactone D-isomerase [EC:5.3.3.4]
K10822	0.0814038	NA	nonpolar-amino-acid-transporting ATPase [EC:7.4.2.2]	K00108	0.0133413	NA	choline dehydrogenase [EC:1.1.99.1]
K01739	0.0806076	M00017	cystathionine gamma-synthase [EC:2.5.1.48]	K23373	0.0132616	M00875	2-[(L-alanin-3-ylcarbamoyl)methyl]-2-hydroxybutanedioate decarboxylase [EC:4.1.1.117]
K00040	0.0805573	M00061	fructuronate reductase [EC:1.1.1.57]	K03719	0.0132601	NA	Lrp/AsnC family transcriptional regulator, leucine-responsive regulatory protein
K05966	0.0800487	NA	triphosphoribosyl-dephospho-CoA synthase [EC:2.4.2.52]	K22225	0.0131654	M00847	siroheme decarboxylase [EC:4.1.1.111]
K19577	0.0794653	NA	MFS transporter, DHA1 family, inner membrane transport protein	K05713	0.0130921	M00545	2,3-dihydroxyphenylpropionate 1,2-dioxygenase [EC:1.13.11.16]
K08195	0.079112	NA	MFS transporter, AAHS family, 4-hydroxybenzoate transporter	K03457	0.0130612	NA	nucleobase:cation symporter-1, NCS1 family
K01999	0.0789197	NA	branched-chain amino acid transport system substrate-binding protein	K20337	0.0127868	NA	phenol-soluble modulin beta
K18138	0.0778533	NA	multidrug efflux pump	K11690	0.0126794	NA	C4-dicarboxylate transporter, DctM subunit
K12574	0.0774792	NA	ribonuclease J [EC:3.1.-.-]	K03088	0.0124212	NA	RNA polymerase sigma-70 factor, ECF subfamily
K00926	0.0771754	NA	carbamate kinase [EC:2.7.2.2]	K02205	0.0124016	NA	arginine/ornithine permease
K03148	0.0769678	M00127	sulfur carrier protein ThiS adenylyltransferase [EC:2.7.7.73]	K07487	0.0123563	NA	transposase
K15125	0.0768939	NA	filamentous hemagglutinin	K01799	0.0122408	M00622	maleate isomerase [EC:5.2.1.1]
K02822	0.0768275	M00550	ascorbate PTS system EIIB component [EC:2.7.1.194]	K00529	0.0122347	NA	3-phenylpropionate/trans-cinnamate dioxygenase ferredoxin reductase component [EC:1.18.1.3]
K05349	0.0762271	NA	beta-glucosidase [EC:3.2.1.21]	K06368	0.0122188	NA	response regulator aspartate phosphatase J [EC:3.1.-.-]
K00483	0.0761623	NA	4-hydroxyphenylacetate 3-monooxygenase [EC:1.14.14.9]	K18909	0.0121313	M00705	MarR family transcriptional regulator, repressor for mepA
K03762	0.0758315	NA	MFS transporter, MHS family, proline/betaine transporter	K15357	0.0121304	M00622	N-formylmaleamate deformylase [EC:3.5.1.106]
K03079	0.0755913	M00550	L-ribulose-5-phosphate 3-epimerase [EC:5.1.3.22]	K06016	0.0121123	M00046	beta-ureidopropionase / N-carbamoyl-L-amino-acid hydrolase [EC:3.5.1.6 3.5.1.87]
K00455	0.075507	M00533	3,4-dihydroxyphenylacetate 2,3-dioxygenase [EC:1.13.11.15]	K01476	0.0120633	M00134	arginase [EC:3.5.3.1]
K19267	0.0753679	NA	NAD(P)H dehydrogenase (quinone) [EC:1.6.5.2]	K22550	0.0120268	M00948	D-hydroxyproline dehydrogenase subunit gamma
K18838	0.0748843	NA	cytoskeleton bundling-enhancing protein CbeA and related proteins	K02049	0.0119693	NA	NitT/TauT family transport system ATP-binding protein
K21064	0.0742975	M00125	5-amino-6-(5-phospho-D-ribitylamino)uracil phosphatase [EC:3.1.3.104]	K11311	0.0119623	M00637	anthranilate 1,2-dioxygenase reductase component [EC:1.18.1.-]
K00371	0.0740188	M00530	nitrate reductase / nitrite oxidoreductase, beta subunit [EC:1.7.5.1 1.7.99.-]	K01406	0.011876	NA	serralysin [EC:3.4.24.40]
K08323	0.0737834	M00061	mannonate dehydratase [EC:4.2.1.8]	K11006	0.0118659	M00363	shiga toxin subunit A
K02775	0.0737031	NA	galactitol PTS system EIIC component	K01768	0.0117799	NA	adenylate cyclase [EC:4.6.1.1]
K12132	0.0736764	NA	eukaryotic-like serine/threonine-protein kinase [EC:2.7.11.1]	K01800	0.0117585	M00044	maleylacetoacetate isomerase [EC:5.2.1.2]
K03078	0.0731697	M00550	3-dehydro-L-gulonate-6-phosphate decarboxylase [EC:4.1.1.85]	K05846	0.0117121	NA	osmoprotectant transport system permease protein
K02510	0.0730734	NA	4-hydroxy-2-oxoheptanedioate aldolase [EC:4.1.2.52]	K07720	0.0116928	NA	two-component system, response regulator YesN
K22302	0.0730113	NA	transcriptional repressor of cell division inhibition gene dicB	K19078	0.0116562	M00725	two-component system, OmpR family, response regulator protein GraR
K01812	0.0727977	M00061	glucuronate isomerase [EC:5.3.1.12]	K19078	0.0116562	M00726	two-component system, OmpR family, response regulator protein GraR
K01812	0.0727977	M00631	glucuronate isomerase [EC:5.3.1.12]	K19078	0.0116562	M00730	two-component system, OmpR family, response regulator protein GraR
K21929	0.0726034	NA	uracil-DNA glycosylase [EC:3.2.2.27]	K18900	0.0116414	M00698	LysR family transcriptional regulator, regulator for bpeEF and oprC
K10439	0.0723374	NA	ribose transport system substrate-binding protein	K09471	0.0115412	NA	gamma-glutamylputrescine oxidase [EC:1.4.3.-]
K05713	0.0721382	NA	2,3-dihydroxyphenylpropionate 1,2-dioxygenase [EC:1.13.11.16]	K01601	0.0115281	M00165	ribulose-bisphosphate carboxylase large chain [EC:4.1.1.39]
K23509	0.0721105	NA	galactofuranose transport system permease protein	K01601	0.0115281	M00166	ribulose-bisphosphate carboxylase large chain [EC:4.1.1.39]
K01897	0.0719913	M00086	long-chain acyl-CoA synthetase [EC:6.2.1.3]	K02167	0.0115136	NA	TetR/AcrR family transcriptional regulator, transcriptional repressor of bet genes
K10012	0.071919	M00761	undecaprenyl-phosphate 4-deoxy-4-formamido-L-arabinose transferase [EC:2.4.2.53]	K01223	0.0114938	NA	6-phospho-beta-glucosidase [EC:3.2.1.86]
K19334	0.0717137	NA	biofilm protein TabA	K06321	0.0113435	NA	spore maturation protein CgeC
K03719	0.0714301	NA	Lrp/AsnC family transcriptional regulator, leucine-responsive regulatory protein	K07347	0.0113267	NA	outer membrane usher protein
K01938	0.0714028	M00140	formate--tetrahydrofolate ligase [EC:6.3.4.3]	K09778	0.0112948	M00866	Kdo2-lipid IVA 3' secondary acyltransferase [EC:2.3.1.-]
K02508	0.070648	NA	AraC family transcriptional regulator, 4-hydroxyphenylacetate 3-monooxygenase operon regulatory protein	K18301	0.0112535	M00642	TetR/AcrR family transcriptional regulator, mexJK operon transcriptional repressor
K01997	0.070606	NA	branched-chain amino acid transport system permease protein	K00375	0.0112296	NA	GntR family transcriptional regulator / MocR family aminotransferase
K07357	0.0705641	NA	type 1 fimbriae regulatory protein FimB	K12658	0.0111257	M00948	4-hydroxyproline epimerase [EC:5.1.1.8]
K02774	0.0703057	NA	galactitol PTS system EIIB component [EC:2.7.1.200]	K05600	0.0110631	M00637	anthranilate 1,2-dioxygenase (deaminating, decarboxylating) small subunit [EC:1.14.12.1]
K00874	0.0699749	M00061	2-dehydro-3-deoxygluconokinase [EC:2.7.1.45]	K01997	0.0109599	NA	branched-chain amino acid transport system permease protein
K00874	0.0699749	M00631	2-dehydro-3-deoxygluconokinase [EC:2.7.1.45]	K02586	0.0109451	NA	nitrogenase molybdenum-iron protein alpha chain [EC:1.18.6.1]
K05846	0.0695453	NA	osmoprotectant transport system permease protein	K02168	0.0108131	NA	choline/glycine/proline betaine transport protein
K01993	0.069276	NA	HlyD family secretion protein	K18029	0.0107696	NA	nicotinate dehydrogenase subunit A [EC:1.17.2.1]
K22508	0.0689018	NA	type III secretion system export apparatus protein	K02305	0.0107198	M00529	nitric oxide reductase subunit C
K01005	0.0688162	NA	polyisoprenyl-teichoic acid--peptidoglycan teichoic acid transferase [EC:2.7.8.-]	K01906	0.0106364	M00577	6-carboxyhexanoate--CoA ligase [EC:6.2.1.14]
K10824	0.0687252	NA	nickel transport system ATP-binding protein [EC:7.2.2.11]	K03832	0.0105707	NA	periplasmic protein TonB
K00373	0.0686156	NA	nitrate reductase molybdenum cofactor assembly chaperone NarJ/NarW	K05599	0.0105327	M00637	anthranilate 1,2-dioxygenase (deaminating, decarboxylating) large subunit [EC:1.14.12.1]
K07250	0.0685673	M00027	4-aminobutyrate aminotransferase / (S)-3-amino-2-methylpropionate transaminase / 5-aminovalerate transaminase [EC:2.6.1.19 2.6.1.22 2.6.1.48]	K21061	0.01046	M00948	D-hydroxyproline dehydrogenase subunit beta [EC:1.5.99.-]
K07035	0.0685579	NA	uncharacterized protein	K23587	0.0104168	NA	superantigen-like protein 5/11
K00313	0.0684551	NA	electron transfer flavoprotein-quinone oxidoreductase [EC:1.5.5.-]	K07126	0.0103851	NA	uncharacterized protein
K23007	0.0683512	NA	L-galactonate 5-dehydrogenase [EC:1.1.1.414]	K02051	0.0103454	NA	NitT/TauT family transport system substrate-binding protein
K05799	0.068034	NA	GntR family transcriptional regulator, transcriptional repressor for pyruvate dehydrogenase complex	K07644	0.0103282	M00745	two-component system, OmpR family, heavy metal sensor histidine kinase CusS [EC:2.7.13.3]
K18900	0.0679843	NA	LysR family transcriptional regulator, regulator for bpeEF and oprC	K15664	0.0103074	NA	fengycin family lipopeptide synthetase A
K03556	0.0677063	NA	LuxR family transcriptional regulator, maltose regulon positive regulatory protein	K07068	0.0103028	NA	uncharacterized protein
K00135	0.0675428	M00027	succinate-semialdehyde dehydrogenase / glutarate-semialdehyde dehydrogenase [EC:1.2.1.16 1.2.1.79 1.2.1.20]	K18652	0.0102337	M00877	glucose-6-phosphate 3-dehydrogenase [EC:1.1.1.361]
K00124	0.0674699	NA	formate dehydrogenase iron-sulfur subunit	K18297	0.0101936	M00641	LysR family transcriptional regulator, mexEF-oprN operon transcriptional activator
K16371	0.0673227	NA	D-tagatose-1,6-bisphosphate aldolase subunit GatZ/KbaZ	K18297	0.0101936	M00745	LysR family transcriptional regulator, mexEF-oprN operon transcriptional activator
K00626	0.0673211	NA	acetyl-CoA C-acetyltransferase [EC:2.3.1.9]	K06352	0.0101076	NA	phosphatase RapA inhibitor
K07644	0.0671357	NA	two-component system, OmpR family, heavy metal sensor histidine kinase CusS [EC:2.7.13.3]	K13021	0.0100823	NA	MFS transporter, ACS family, tartrate transporter
K00884	0.0665269	NA	N-acetylglucosamine kinase [EC:2.7.1.59]	K01602	0.0100516	M00165	ribulose-bisphosphate carboxylase small chain [EC:4.1.1.39]
K10558	0.0663508	NA	AI-2 transport system ATP-binding protein	K01602	0.0100516	M00166	ribulose-bisphosphate carboxylase small chain [EC:4.1.1.39]
K02532	0.0660345	NA	MFS transporter, OHS family, lactose permease	K04748	0.010044	NA	nitric oxide reductase NorQ protein
K02511	0.0657809	NA	MFS transporter, ACS family, 4-hydroxyphenylacetate permease	K09007	0.00996446	NA	GTP cyclohydrolase IB [EC:3.5.4.16]
K00344	0.0656511	NA	NADPH:quinone reductase [EC:1.6.5.5]	K02591	0.00991639	NA	nitrogenase molybdenum-iron protein beta chain [EC:1.18.6.1]
K18640	0.0655804	NA	plasmid segregation protein ParM	K08152	0.00990859	NA	MFS transporter, DHA1 family, multidrug resistance protein B
K12068	0.065473	NA	conjugal transfer pilus assembly protein TraL	K03543	0.00990563	NA	membrane fusion protein, multidrug efflux system
K02821	0.0653101	M00550	ascorbate PTS system EIIA or EIIAB component [EC:2.7.1.194]	K18139	0.00990014	M00642	outer membrane protein, multidrug efflux system
K03855	0.0652625	NA	ferredoxin like protein	K18139	0.00990014	M00643	outer membrane protein, multidrug efflux system
K00374	0.0650866	M00530	nitrate reductase gamma subunit [EC:1.7.5.1 1.7.99.-]	K18139	0.00990014	M00718	outer membrane protein, multidrug efflux system
K02567	0.0649102	M00530	nitrate reductase (cytochrome) [EC:1.9.6.1]	K02055	0.00987735	NA	putative spermidine/putrescine transport system substrate-binding protein
K02575	0.0647345	NA	MFS transporter, NNP family, nitrate/nitrite transporter	K22549	0.00983514	M00948	D-hydroxyproline dehydrogenase subunit alpha [EC:1.5.99.-]
K03736	0.0638556	NA	ethanolamine ammonia-lyase small subunit [EC:4.3.1.7]	K07127	0.00982926	M00546	5-hydroxyisourate hydrolase [EC:3.5.2.17]
K15977	0.0637116	NA	putative oxidoreductase	K18030	0.00980137	NA	nicotinate dehydrogenase subunit B [EC:1.17.2.1]
K15553	0.063581	NA	sulfonate transport system substrate-binding protein	K02588	0.00977557	M00175	nitrogenase iron protein NifH
K06905	0.0632953	NA	uncharacterized protein	K18653	0.00976544	M00877	3-dehydro-glucose-6-phosphate---glutamate transaminase [EC:2.6.1.104]
K07306	0.0632231	NA	anaerobic dimethyl sulfoxide reductase subunit A [EC:1.8.5.3]	K00433	0.00975749	NA	non-heme chloroperoxidase [EC:1.11.1.10]
K21471	0.0628989	NA	peptidoglycan DL-endopeptidase CwlO [EC:3.4.-.-]	K02012	0.00974208	NA	iron(III) transport system substrate-binding protein
K12518	0.0628918	NA	outer membrane usher protein PapC	K15125	0.00973865	NA	filamentous hemagglutinin
K07720	0.062653	NA	two-component system, response regulator YesN	K14974	0.00965807	M00622	6-hydroxynicotinate 3-monooxygenase [EC:1.14.13.114]
K02124	0.0625895	NA	V/A-type H+/Na+-transporting ATPase subunit K	K02230	0.0096433	NA	cobaltochelatase CobN [EC:6.6.1.2]
K01652	0.0624581	M00019	acetolactate synthase I/II/III large subunit [EC:2.2.1.6]	K21064	0.00963532	NA	5-amino-6-(5-phospho-D-ribitylamino)uracil phosphatase [EC:3.1.3.104]
K01652	0.0624581	M00570	acetolactate synthase I/II/III large subunit [EC:2.2.1.6]	K15270	0.00963089	NA	S-adenosylmethionine uptake transporter
K04069	0.062413	NA	pyruvate formate lyase activating enzyme [EC:1.97.1.4]	K14196	0.00962916	NA	immunoglobulin G-binding protein A
K02782	0.0622913	NA	glucitol/sorbitol PTS system EIIB component [EC:2.7.1.198]	K00936	0.00961395	NA	two-component system, sensor histidine kinase PdtaS [EC:2.7.13.3]
K00065	0.0622207	NA	2-dehydro-3-deoxy-D-gluconate 5-dehydrogenase [EC:1.1.1.127]	K07729	0.00952028	NA	putative transcriptional regulator
K01685	0.0621753	M00631	altronate hydrolase [EC:4.2.1.7]	K23371	0.00951992	M00875	L-serine kinase (ATP) / ParB family transcriptional regulator, heme-responsive regulator [EC:2.7.1.225]
K02569	0.0620304	NA	cytochrome c-type protein NapC	K07979	0.00950879	NA	GntR family transcriptional regulator
K07126	0.0618998	NA	uncharacterized protein	K04065	0.00950644	NA	hyperosmotically inducible periplasmic protein
K07284	0.0616804	NA	sortase A [EC:3.4.22.70]	K08305	0.00950507	NA	membrane-bound lytic murein transglycosylase B [EC:4.2.2.-]
K07349	0.0615098	NA	minor fimbrial subunit	K16079	0.00948378	NA	outer membrane immunogenic protein
K03299	0.0614436	NA	gluconate:H+ symporter, GntP family	K01055	0.00946014	M00568	3-oxoadipate enol-lactonase [EC:3.1.1.24]
K00041	0.0613195	M00631	tagaturonate reductase [EC:1.1.1.58]	K02011	0.0094397	NA	iron(III) transport system permease protein
K03437	0.061154	NA	RNA methyltransferase, TrmH family	K01644	0.00940122	NA	citrate lyase subunit beta / citryl-CoA lyase [EC:4.1.3.34]
K02099	0.0611299	NA	AraC family transcriptional regulator, arabinose operon regulatory protein	K18028	0.00939796	M00622	2,5-dihydroxypyridine 5,6-dioxygenase [EC:1.13.11.9]
K02434	0.0610817	NA	aspartyl-tRNA(Asn)/glutamyl-tRNA(Gln) amidotransferase subunit B [EC:6.3.5.6 6.3.5.7]	K02624	0.0093876	NA	IclR family transcriptional regulator, pca regulon regulatory protein
K18837	0.0609529	NA	cytoskeleton-binding toxin CbtA and related proteins	K00832	0.00932339	M00044	aromatic-amino-acid transaminase [EC:2.6.1.57]
K00821	0.0608935	M00016	acetylornithine/N-succinyldiaminopimelate aminotransferase [EC:2.6.1.11 2.6.1.17]	K14199	0.00931331	NA	staphylococcal complement inhibitor
K00821	0.0608935	M00028	acetylornithine/N-succinyldiaminopimelate aminotransferase [EC:2.6.1.11 2.6.1.17]	K07649	0.00930672	NA	two-component system, OmpR family, sensor histidine kinase TctE [EC:2.7.13.3]
K12944	0.0608874	NA	nucleoside triphosphatase [EC:3.6.1.-]	K16957	0.00929453	NA	L-cystine transport system substrate-binding protein
K00362	0.0607395	M00530	nitrite reductase (NADH) large subunit [EC:1.7.1.15]	K02587	0.00928483	NA	nitrogenase molybdenum-cofactor synthesis protein NifE
K06282	0.0603133	NA	hydrogenase small subunit [EC:1.12.99.6]	K19273	0.00928462	NA	streptothricin acetyltransferase [EC:2.3.-.-]
K06903	0.0602947	NA	uncharacterized protein	K04033	0.00927154	NA	AraC family transcriptional regulator, ethanolamine operon transcriptional activator
K03457	0.0602177	NA	nucleobase:cation symporter-1, NCS1 family	K02164	0.00924761	NA	nitric oxide reductase NorE protein
K16137	0.0602133	NA	TetR/AcrR family transcriptional regulator, transcriptional repressor for nem operon	K09681	0.00922112	NA	LysR family transcriptional regulator, transcription activator of glutamate synthase operon
K03605	0.0599127	NA	hydrogenase maturation protease [EC:3.4.23.-]	K23536	0.00921945	NA	general nucleoside transport system permease protein
K00380	0.059481	NA	sulfite reductase (NADPH) flavoprotein alpha-component [EC:1.8.1.2]	K07315	0.0092186	NA	phosphoserine phosphatase RsbU/P [EC:3.1.3.3]
K03449	0.0592436	NA	MFS transporter, CP family, cyanate transporter	K17737	0.00921022	NA	LysR family transcriptional regulator, carnitine catabolism transcriptional activator
K11531	0.0592351	NA	lsr operon transcriptional repressor	K03315	0.0092093	NA	Na+:H+ antiporter, NhaC family
K02275	0.0588856	M00155	cytochrome c oxidase subunit II [EC:7.1.1.9]	K02596	0.00920073	NA	nitrogen fixation protein NifX
K23349	0.0588678	NA	putative dimethyl sulfoxide reductase chaperone	K02028	0.00918202	NA	polar amino acid transport system ATP-binding protein [EC:7.4.2.1]
K18682	0.0588197	NA	ribonucrease Y [EC:3.1.-.-]	K19550	0.00916599	M00787	bacilysin biosynthesis oxidoreductase BacG [EC:1.3.1.-]
K14052	0.0587589	NA	putrescine importer	K21757	0.00916089	NA	LysR family transcriptional regulator, benzoate and cis,cis-muconate-responsive activator of ben and cat genes
K02171	0.0586718	NA	BlaI family transcriptional regulator, penicillinase repressor	K09476	0.00915304	NA	outer membrane pore protein F
K09471	0.0586189	NA	gamma-glutamylputrescine oxidase [EC:1.4.3.-]	K01046	0.00915039	NA	triacylglycerol lipase [EC:3.1.1.3]
K00965	0.0584487	M00554	UDPglucose--hexose-1-phosphate uridylyltransferase [EC:2.7.7.12]	K09017	0.00914354	NA	TetR/AcrR family transcriptional regulator
K00965	0.0584487	M00632	UDPglucose--hexose-1-phosphate uridylyltransferase [EC:2.7.7.12]	K00140	0.00914033	NA	malonate-semialdehyde dehydrogenase (acetylating) / methylmalonate-semialdehyde dehydrogenase [EC:1.2.1.18 1.2.1.27]
K00116	0.0582283	M00009	malate dehydrogenase (quinone) [EC:1.1.5.4]	K01483	0.00912723	NA	ureidoglycolate lyase [EC:4.3.2.3]
K00116	0.0582283	M00011	malate dehydrogenase (quinone) [EC:1.1.5.4]	K21159	0.009126	NA	epoxide hydrolase
K06884	0.0581491	NA	uncharacterized protein	K15553	0.00908059	NA	sulfonate transport system substrate-binding protein
K06162	0.0579445	NA	alpha-D-ribose 1-methylphosphonate 5-triphosphate diphosphatase [EC:3.6.1.63]	K11927	0.00908035	NA	ATP-dependent RNA helicase RhlE [EC:3.6.4.13]
K02804	0.0579411	NA	N-acetylglucosamine PTS system EIICBA or EIICB component [EC:2.7.1.193]	K18335	0.00902044	NA	2-keto-3-deoxy-L-fuconate dehydrogenase [EC:1.1.1.-]
K15580	0.0578856	NA	oligopeptide transport system substrate-binding protein	K05898	0.00901476	NA	3-oxosteroid 1-dehydrogenase [EC:1.3.99.4]
K07665	0.0577361	NA	two-component system, OmpR family, copper resistance phosphate regulon response regulator CusR	K00128	0.00900746	M00135	aldehyde dehydrogenase (NAD+) [EC:1.2.1.3]
K02002	0.0576719	NA	glycine betaine/proline transport system substrate-binding protein	K01429	0.00900609	NA	urease subunit beta [EC:3.5.1.5]
K01485	0.0576074	NA	cytosine/creatinine deaminase [EC:3.5.4.1 3.5.4.21]	K01114	0.0089917	NA	phospholipase C [EC:3.1.4.3]
K07308	0.0575678	NA	anaerobic dimethyl sulfoxide reductase subunit C	K02592	0.00898226	NA	nitrogenase molybdenum-iron protein NifN
K02274	0.0575557	M00155	cytochrome c oxidase subunit I [EC:7.1.1.9]	K06077	0.00897064	NA	outer membrane lipoprotein SlyB
K07729	0.0573569	NA	putative transcriptional regulator	K07665	0.00891863	M00745	two-component system, OmpR family, copper resistance phosphate regulon response regulator CusR
K12962	0.0573285	NA	undecaprenyl phosphate-alpha-L-ara4N flippase subunit ArnE	K21062	0.00890493	M00948	1-pyrroline-4-hydroxy-2-carboxylate deaminase [EC:3.5.4.22]
K04653	0.057323	NA	hydrogenase expression/formation protein HypC	K07044	0.00888976	NA	uncharacterized protein
K06960	0.0571215	NA	uncharacterized protein	K11477	0.00888074	NA	glc operon protein GlcG
K13069	0.057103	NA	diguanylate cyclase [EC:2.7.7.65]	K03585	0.0088787	M00718	membrane fusion protein, multidrug efflux system
K01493	0.056853	NA	dCMP deaminase [EC:3.5.4.12]	K10209	0.00887322	NA	4,4'-diapophytoene desaturase [EC:1.3.8.2]
K03705	0.0567852	NA	heat-inducible transcriptional repressor	K11624	0.00887295	NA	two-component system, NarL family, response regulator YdfI
K01998	0.056639	NA	branched-chain amino acid transport system permease protein	K23535	0.00887198	NA	general nucleoside transport system permease protein
K11903	0.0566387	NA	type VI secretion system secreted protein Hcp	K08995	0.00884802	NA	putative membrane protein
K18920	0.0565844	NA	protein HokA	K00845	0.00884524	NA	glucokinase [EC:2.7.1.2]
K21090	0.0564777	NA	c-di-GMP phosphodiesterase [EC:3.1.4.52]	K06938	0.00884279	NA	uncharacterized protein
K01811	0.056462	NA	alpha-D-xyloside xylohydrolase [EC:3.2.1.177]	K00074	0.00882493	NA	3-hydroxybutyryl-CoA dehydrogenase [EC:1.1.1.157]
K10680	0.056319	NA	N-ethylmaleimide reductase [EC:1.-.-.-]	K06994	0.00881548	NA	putative drug exporter of the RND superfamily
K01222	0.0561012	NA	6-phospho-beta-glucosidase [EC:3.2.1.86]	K19744	0.00881277	M00947	L-arginine dehydrogenase [EC:1.4.1.25]
K02455	0.0560108	NA	general secretion pathway protein F	K07145	0.00880033	NA	heme oxygenase (staphylobilin-producing) [EC:1.14.99.48]
K07675	0.0558552	NA	two-component system, NarL family, sensor histidine kinase UhpB [EC:2.7.13.3]	K01430	0.00875325	NA	urease subunit gamma [EC:3.5.1.5]
K03543	0.0557031	NA	membrane fusion protein, multidrug efflux system	K12548	0.00873063	NA	autoaggregation protein RapA/B/C
K03623	0.0555787	NA	ribonuclease inhibitor	K04517	0.00872872	NA	prephenate dehydrogenase [EC:1.3.1.12]
K06211	0.0554934	NA	HTH-type transcriptional regulator, transcriptional repressor of NAD biosynthesis genes [EC:2.7.7.1 2.7.1.22]	K02545	0.00870506	NA	penicillin-binding protein 2 prime [EC:3.4.16.4]
K02015	0.0554528	NA	iron complex transport system permease protein	K03286	0.00870124	NA	OmpA-OmpF porin, OOP family
K02299	0.0554024	M00417	cytochrome o ubiquinol oxidase subunit III	K00824	0.00869731	NA	D-alanine transaminase [EC:2.6.1.21]
K06906	0.0553524	NA	uncharacterized protein	K01998	0.00869723	NA	branched-chain amino acid transport system permease protein
K02066	0.0553469	NA	phospholipid/cholesterol/gamma-HCH transport system permease protein	K21703	0.00869588	NA	LysR family transcriptional regulator, low CO2-responsive transcriptional regulator
K18672	0.0553223	NA	diadenylate cyclase [EC:2.7.7.85]	K19005	0.00868356	NA	lipoteichoic acid synthase [EC:2.7.8.20]
K16514	0.0551387	NA	4-oxalomesaconate tautomerase [EC:5.3.2.8]	K07080	0.00867188	NA	uncharacterized protein
K01785	0.0550718	M00632	aldose 1-epimerase [EC:5.1.3.3]	K03559	0.00866087	NA	biopolymer transport protein ExbD
K00688	0.0550202	M00855	glycogen phosphorylase [EC:2.4.1.1]	K11737	0.00865508	NA	D-serine/D-alanine/glycine transporter
K14998	0.0550021	NA	surfeit locus 1 family protein	K06973	0.00864936	NA	uncharacterized protein
K07506	0.054972	NA	AraC family transcriptional regulator	K19547	0.00862512	M00787	3-[(4R)-4-hydroxycyclohexa-1,5-dien-1-yl]-2-oxopropanoate isomerase [EC:5.3.3.19]
K04565	0.0547772	NA	superoxide dismutase, Cu-Zn family [EC:1.15.1.1]	K11007	0.00860618	M00363	shiga toxin subunit B
K23779	0.0547347	NA	XRE family transcriptional regulator, regulator of sulfur utilization	K01991	0.00860012	NA	polysaccharide biosynthesis/export protein
K00694	0.05473	NA	cellulose synthase (UDP-forming) [EC:2.4.1.12]	K05568	0.00857527	NA	multicomponent Na+:H+ antiporter subunit D
K02035	0.0546213	NA	peptide/nickel transport system substrate-binding protein	K02304	0.00855414	M00924	precorrin-2 dehydrogenase / sirohydrochlorin ferrochelatase [EC:1.3.1.76 4.99.1.4]
K12963	0.0545745	NA	undecaprenyl phosphate-alpha-L-ara4N flippase subunit ArnF	K04749	0.00853142	NA	anti-sigma B factor antagonist
K00529	0.0544179	NA	3-phenylpropionate/trans-cinnamate dioxygenase ferredoxin reductase component [EC:1.18.1.3]	K19693	0.0085162	NA	AraC family transcriptional regulator, chitin signaling transcriptional activator
K07733	0.0542619	NA	prophage regulatory protein	K01641	0.00850579	M00095	hydroxymethylglutaryl-CoA synthase [EC:2.3.3.10]
K07397	0.0542397	NA	putative redox protein	K02517	0.00848793	M00866	Kdo2-lipid IVA lauroyltransferase/acyltransferase [EC:2.3.1.241 2.3.1.-]
K03670	0.054166	NA	periplasmic glucans biosynthesis protein	K02585	0.0084748	NA	nitrogen fixation protein NifB
K18926	0.0538847	NA	MFS transporter, DHA2 family, lincomycin resistance protein	K04091	0.00846276	NA	alkanesulfonate monooxygenase [EC:1.14.14.5]
K11530	0.0538752	NA	(4S)-4-hydroxy-5-phosphonooxypentane-2,3-dione isomerase [EC:5.3.1.32]	K13587	0.00844979	NA	two-component system, cell cycle sensor histidine kinase and response regulator CckA [EC:2.7.13.3]
K07152	0.0538719	NA	protein SCO1	K02482	0.00843513	NA	two-component system, NtrC family, sensor kinase [EC:2.7.13.3]
K00265	0.0538322	NA	glutamate synthase (NADPH) large chain [EC:1.4.1.13]	K16245	0.00841866	M00548	phenol/toluene 2-monooxygenase (NADH) P4/A4 [EC:1.14.13.244 1.14.13.243]
K17737	0.0537776	NA	LysR family transcriptional regulator, carnitine catabolism transcriptional activator	K00020	0.00840938	NA	3-hydroxyisobutyrate dehydrogenase [EC:1.1.1.31]
K10440	0.0537232	NA	ribose transport system permease protein	K07062	0.00840495	NA	toxin FitB [EC:3.1.-.-]
K16692	0.0537168	NA	tyrosine-protein kinase Etk/Wzc [EC:2.7.10.-]	K02234	0.00840152	NA	cobalamin biosynthesis protein CobW
K04486	0.053711	M00026	histidinol-phosphatase (PHP family) [EC:3.1.3.15]	K11921	0.00838223	NA	LysR family transcriptional regulator, cyn operon transcriptional activator
K23240	0.0537056	NA	FrmR/RcnR family transcriptional regulator, repressor of rcnA expression	K02759	0.0083792	NA	cellobiose PTS system EIIA component [EC:2.7.1.196 2.7.1.205]
K02435	0.0535525	NA	aspartyl-tRNA(Asn)/glutamyl-tRNA(Gln) amidotransferase subunit C [EC:6.3.5.6 6.3.5.7]	K05799	0.00837173	NA	GntR family transcriptional regulator, transcriptional repressor for pyruvate dehydrogenase complex
K09020	0.0534785	M00939	ureidoacrylate peracid hydrolase [EC:3.5.1.110]	K11903	0.00833969	NA	type VI secretion system secreted protein Hcp
K14393	0.05346	NA	cation/acetate symporter	K11811	0.00833739	NA	arsenical resistance protein ArsH
K02123	0.0531017	NA	V/A-type H+/Na+-transporting ATPase subunit I	K06995	0.00830404	NA	uncharacterized protein
K01686	0.0530147	M00061	mannonate dehydratase [EC:4.2.1.8]	K05548	0.00827679	NA	MFS transporter, AAHS family, benzoate transport protein
K01465	0.0529356	NA	dihydroorotase [EC:3.5.2.3]	K01816	0.00822997	NA	hydroxypyruvate isomerase [EC:5.3.1.22]
K16899	0.0528746	NA	ATP-dependent helicase/nuclease subunit B [EC:3.1.-.- 3.6.4.12]	K19339	0.00822833	NA	NosR/NirI family transcriptional regulator, nitrous oxide reductase regulator
K02276	0.0528287	M00155	cytochrome c oxidase subunit III [EC:7.1.1.9]	K03981	0.00821607	NA	thiol:disulfide interchange protein DsbC [EC:5.3.4.1]
K03585	0.0528248	NA	membrane fusion protein, multidrug efflux system	K13503	0.00821198	NA	anthranilate synthase [EC:4.1.3.27]
K03281	0.0527111	NA	chloride channel protein, CIC family	K03746	0.00819433	NA	DNA-binding protein H-NS
K05714	0.0526742	NA	2-hydroxy-6-oxonona-2,4-dienedioate hydrolase [EC:3.7.1.14]	K01971	0.00818679	NA	bifunctional non-homologous end joining protein LigD [EC:6.5.1.1]
K07319	0.0525833	NA	adenine-specific DNA-methyltransferase [EC:2.1.1.72]	K10125	0.0081824	NA	two-component system, NtrC family, C4-dicarboxylate transport sensor histidine kinase DctB [EC:2.7.13.3]
K14063	0.0525407	NA	AraC family transcriptional regulator, positive regulator of tynA and feaB	K16236	0.00817807	NA	histidine permease
K02034	0.0524716	NA	peptide/nickel transport system permease protein	K03561	0.00817096	NA	biopolymer transport protein ExbB
K22507	0.0522783	NA	type III secretion system export apparatus protein	K00040	0.00816805	NA	fructuronate reductase [EC:1.1.1.57]
K02028	0.0522412	NA	polar amino acid transport system ATP-binding protein [EC:7.4.2.1]	K07307	0.00815737	NA	anaerobic dimethyl sulfoxide reductase subunit B
K21039	0.0522327	NA	enterobacteria phage integrase [EC:2.7.7.- 3.1.-.-]	K05818	0.00814728	NA	IclR family transcriptional regulator, mhp operon transcriptional activator
K02458	0.0522029	NA	general secretion pathway protein I	K00573	0.00814594	NA	protein-L-isoaspartate(D-aspartate) O-methyltransferase [EC:2.1.1.77]
K03737	0.0519897	M00307	pyruvate-ferredoxin/flavodoxin oxidoreductase [EC:1.2.7.1 1.2.7.-]	K11891	0.00813626	NA	type VI secretion system protein ImpL
K01451	0.0518348	NA	hippurate hydrolase [EC:3.5.1.32]	K07262	0.00809167	NA	serine-type D-Ala-D-Ala endopeptidase (penicillin-binding protein 7) [EC:3.4.21.-]
K01193	0.0517203	NA	beta-fructofuranosidase [EC:3.2.1.26]	K00285	0.0080874	NA	D-amino-acid dehydrogenase [EC:1.4.5.1]
K08738	0.0517024	NA	cytochrome c	K09794	0.00807985	NA	uncharacterized protein
K08137	0.0516868	NA	MFS transporter, SP family, galactose:H+ symporter	K10682	0.00806738	NA	two-component system, OmpR family, response regulator SaeR
K03709	0.051486	NA	DtxR family transcriptional regulator, Mn-dependent transcriptional regulator	K18013	0.00806291	NA	3-keto-5-aminohexanoate cleavage enzyme [EC:2.3.1.247]
K06159	0.0514101	NA	multidrug/microcin transport system ATP-binding/permease protein	K01626	0.00804511	NA	3-deoxy-7-phosphoheptulonate synthase [EC:2.5.1.54]
K07742	0.0513088	NA	uncharacterized protein	K21090	0.00802846	NA	c-di-GMP phosphodiesterase [EC:3.1.4.52]
K07726	0.051137	NA	putative transcriptional regulator	K21137	0.00802384	NA	membrane fusion protein, multidrug efflux system
K10557	0.0510091	NA	AI-2 transport system permease protein	K18926	0.00801345	NA	MFS transporter, DHA2 family, lincomycin resistance protein
K21974	0.0507707	NA	probable RcsB/C two-component-system connector	K01968	0.00800662	NA	3-methylcrotonyl-CoA carboxylase alpha subunit [EC:6.4.1.4]
K07788	0.0507045	NA	multidrug efflux pump	K11073	0.00799761	NA	putrescine transport system substrate-binding protein
K05375	0.0506836	NA	MbtH protein	K07793	0.00799701	NA	putative tricarboxylic transport membrane protein
K00285	0.0506759	NA	D-amino-acid dehydrogenase [EC:1.4.5.1]	K11895	0.00799638	NA	type VI secretion system protein ImpH
K01638	0.0504744	M00012	malate synthase [EC:2.3.3.9]	K05594	0.00799284	NA	ElaB protein
K08602	0.0504493	NA	oligoendopeptidase F [EC:3.4.24.-]	K06192	0.00798798	NA	paraquat-inducible protein B
K01077	0.0503622	M00126	alkaline phosphatase [EC:3.1.3.1]	K16137	0.00797136	NA	TetR/AcrR family transcriptional regulator, transcriptional repressor for nem operon
K02759	0.050349	NA	cellobiose PTS system EIIA component [EC:2.7.1.196 2.7.1.205]	K09684	0.00795683	NA	PucR family transcriptional regulator, purine catabolism regulatory protein
K02457	0.050305	NA	general secretion pathway protein H	K18893	0.00794565	NA	ATP-binding cassette, subfamily B, multidrug efflux pump
K07019	0.0502535	NA	uncharacterized protein	K07284	0.00793032	NA	sortase A [EC:3.4.22.70]
K02552	0.050212	M00116	menaquinone-specific isochorismate synthase [EC:5.4.4.2]	K12989	0.00792615	NA	mannosyltransferase [EC:2.4.1.-]
K13244	0.0501906	NA	c-di-GMP-specific phosphodiesterase [EC:3.1.4.52]	K05343	0.00792542	NA	maltose alpha-D-glucosyltransferase / alpha-amylase [EC:5.4.99.16 3.2.1.1]
K02760	0.0501826	NA	cellobiose PTS system EIIB component [EC:2.7.1.196 2.7.1.205]	K07638	0.00792389	NA	two-component system, OmpR family, osmolarity sensor histidine kinase EnvZ [EC:2.7.13.3]
K02013	0.0501309	NA	iron complex transport system ATP-binding protein [EC:7.2.2.-]	K05020	0.00791325	NA	glycine betaine transporter
K03817	0.0500246	NA	ribosomal-protein-serine acetyltransferase [EC:2.3.1.-]	K19591	0.00790638	M00769	MerR family transcriptional regulator, copper efflux regulator
K23123	0.0499912	NA	5-oxoprolinase (ATP-hydrolysing) subunit B [EC:3.5.2.9]	K09472	0.00789834	NA	4-(gamma-glutamylamino)butanal dehydrogenase [EC:1.2.1.99]
K18919	0.0499402	NA	protein HokC/D	K03187	0.00789615	NA	urease accessory protein
K00949	0.0498991	NA	thiamine pyrophosphokinase [EC:2.7.6.2]	K18480	0.00787956	NA	cholesterol transport system auxiliary component
K02030	0.0498724	NA	polar amino acid transport system substrate-binding protein	K07516	0.00785855	M00087	3-hydroxyacyl-CoA dehydrogenase [EC:1.1.1.35]
K03304	0.049805	NA	tellurite resistance protein	K03930	0.00785145	NA	putative tributyrin esterase [EC:3.1.1.-]
K01372	0.0497775	NA	bleomycin hydrolase [EC:3.4.22.40]	K21463	0.00784961	NA	membrane-associated protein TcaA
K01653	0.0497409	M00019	acetolactate synthase I/III small subunit [EC:2.2.1.6]	K18922	0.00784545	NA	protein HokE
K01653	0.0497409	M00570	acetolactate synthase I/III small subunit [EC:2.2.1.6]	K01004	0.00783742	NA	phosphatidylcholine synthase [EC:2.7.8.24]
K07322	0.0496968	NA	regulator of cell morphogenesis and NO signaling	K21699	0.00783343	NA	LysR family transcriptional regulator, transcriptional activator for bauABCD operon
K11746	0.0496958	NA	glutathione-regulated potassium-efflux system ancillary protein KefF	K15313	0.00782243	NA	polyketide biosynthesis enoyl-CoA hydratase PksI
K04030	0.0496009	NA	ethanolamine utilization protein EutQ	K03190	0.00782226	NA	urease accessory protein
K07979	0.0495889	NA	GntR family transcriptional regulator	K00135	0.00781337	NA	succinate-semialdehyde dehydrogenase / glutarate-semialdehyde dehydrogenase [EC:1.2.1.16 1.2.1.79 1.2.1.20]
K00912	0.0495513	M00060	tetraacyldisaccharide 4'-kinase [EC:2.7.1.130]	K07002	0.00780042	NA	uncharacterized protein
K02300	0.0494795	M00417	cytochrome o ubiquinol oxidase subunit IV	K01561	0.00777306	NA	haloacetate dehalogenase [EC:3.8.1.3]
K07139	0.0494791	NA	uncharacterized protein	K00457	0.0077717	M00044	4-hydroxyphenylpyruvate dioxygenase [EC:1.13.11.27]
K01760	0.0494528	M00017	cysteine-S-conjugate beta-lyase [EC:4.4.1.13]	K01581	0.00775914	M00134	ornithine decarboxylase [EC:4.1.1.17]
K03782	0.0493939	NA	catalase-peroxidase [EC:1.11.1.21]	K08084	0.00775315	NA	type IV fimbrial biogenesis protein FimT
K01840	0.0492826	NA	phosphomannomutase [EC:5.4.2.8]	K06987	0.00774735	NA	uncharacterized protein
K05712	0.0490555	NA	3-(3-hydroxy-phenyl)propionate hydroxylase [EC:1.14.13.127]	K07032	0.00774092	NA	uncharacterized protein
K01066	0.0490142	NA	acetyl esterase [EC:3.1.1.-]	K01071	0.00773592	NA	medium-chain acyl-[acyl-carrier-protein] hydrolase [EC:3.1.2.21]
K11202	0.0490139	NA	fructose-like PTS system EIIB component [EC:2.7.1.-]	K13037	0.00773391	M00787	L-alanine-L-anticapsin ligase [EC:6.3.2.49]
K06442	0.0489811	NA	23S rRNA (cytidine1920-2'-O)/16S rRNA (cytidine1409-2'-O)-methyltransferase [EC:2.1.1.226 2.1.1.227]	K01560	0.00771907	NA	2-haloacid dehalogenase [EC:3.8.1.2]
K06946	0.0488976	NA	uncharacterized protein	K20260	0.00770707	NA	phenazine biosynthesis protein
K08234	0.0488526	NA	glyoxylase I family protein	K00344	0.00770518	NA	NADPH:quinone reductase [EC:1.6.5.5]
K07246	0.0488288	NA	tartrate dehydrogenase/decarboxylase / D-malate dehydrogenase [EC:1.1.1.93 4.1.1.73 1.1.1.83]	K07794	0.00770375	NA	putative tricarboxylic transport membrane protein
K03477	0.048795	NA	DeoR family transcriptional regulator, ulaG and ulaABCDEF operon transcriptional repressor	K23120	0.0076943	M00949	histidine 2-aminobutanoyltransferase [EC:2.5.1.152 2.5.1.-]
K01914	0.0487933	NA	aspartate--ammonia ligase [EC:6.3.1.1]	K03089	0.00768928	NA	RNA polymerase sigma-32 factor
K21757	0.0487583	NA	LysR family transcriptional regulator, benzoate and cis,cis-muconate-responsive activator of ben and cat genes	K11039	0.0076771	NA	delta-hemolysin
K22293	0.0486936	NA	GntR family transcriptional regulator, rspAB operon transcriptional repressor	K02448	0.00766852	NA	nitric oxide reductase NorD protein
K02303	0.0485715	M00846	uroporphyrin-III C-methyltransferase [EC:2.1.1.107]	K02750	0.00765427	NA	alpha-glucoside PTS system EIICB component [EC:2.7.1.208 2.7.1.-]
K09024	0.0484982	M00939	flavin reductase [EC:1.5.1.-]	K17763	0.00764985	NA	rsbT co-antagonist protein RsbR
K06871	0.0483933	NA	uncharacterized protein	K02052	0.00764778	NA	putative spermidine/putrescine transport system ATP-binding protein
K23015	0.0483637	NA	GntR family transcriptional regulator, transcriptional activator for L-galactonate catabolism	K10680	0.00764702	NA	N-ethylmaleimide reductase [EC:1.-.-.-]
K02570	0.0482798	NA	periplasmic nitrate reductase NapD	K13936	0.0076362	NA	malonate transporter and related proteins
K02747	0.0482073	NA	N-acetylgalactosamine PTS system EIID component	K07506	0.00763312	NA	AraC family transcriptional regulator
K16301	0.0481865	NA	deferrochelatase/peroxidase EfeB [EC:1.11.1.-]	K16246	0.00762124	M00548	phenol/toluene 2-monooxygenase (NADH) P5/A5 [EC:1.14.13.244 1.14.13.243]
K03561	0.0481337	NA	biopolymer transport protein ExbB	K07000	0.00761988	NA	uncharacterized protein
K19337	0.0480207	NA	RpiR family transcriptional regulator, carbohydrate utilization regulator	K01552	0.00758995	NA	energy-coupling factor transport system ATP-binding protein [EC:3.6.3.-]
K07803	0.0479343	NA	zinc resistance-associated protein	K05782	0.00757693	NA	benzoate membrane transport protein
K07458	0.0479102	NA	DNA mismatch endonuclease, patch repair protein [EC:3.1.-.-]	K12976	0.00757056	NA	lipid A 3-O-deacylase [EC:3.1.1.-]
K05834	0.0478421	NA	homoserine/homoserine lactone efflux protein	K02298	0.00756399	NA	cytochrome o ubiquinol oxidase subunit I [EC:7.1.1.3]
K02781	0.0477816	NA	glucitol/sorbitol PTS system EIIA component [EC:2.7.1.198]	K15866	0.00755622	NA	2-(1,2-epoxy-1,2-dihydrophenyl)acetyl-CoA isomerase [EC:5.3.3.18]
K14056	0.0476799	NA	HTH-type transcriptional regulator, repressor for puuD	K01401	0.00753637	NA	aureolysin [EC:3.4.24.29]
K03832	0.0476671	NA	periplasmic protein TonB	K00019	0.00752967	NA	3-hydroxybutyrate dehydrogenase [EC:1.1.1.30]
K16785	0.0475277	NA	energy-coupling factor transport system permease protein	K02614	0.00752842	NA	acyl-CoA thioesterase [EC:3.1.2.-]
K03821	0.047491	NA	polyhydroxyalkanoate synthase subunit PhaC [EC:2.3.1.-]	K01251	0.00752787	NA	adenosylhomocysteinase [EC:3.3.1.1]
K06887	0.0474903	NA	uncharacterized protein	K10254	0.00752775	NA	oleate hydratase [EC:4.2.1.53]
K02083	0.0474735	NA	allantoate deiminase [EC:3.5.3.9]	K01496	0.00752471	NA	phosphoribosyl-AMP cyclohydrolase [EC:3.5.4.19]
K21965	0.0474238	NA	Mat/Ecp fimbriae periplasmic chaperone	K00376	0.00751908	M00529	nitrous-oxide reductase [EC:1.7.2.4]
K11103	0.0473959	NA	aerobic C4-dicarboxylate transport protein	K00116	0.00751757	NA	malate dehydrogenase (quinone) [EC:1.1.5.4]
K09771	0.0473844	NA	small multidrug resistance family-3 protein	K15519	0.00751062	NA	deoxyadenosine/deoxycytidine kinase [EC:2.7.1.76 2.7.1.74]
K03606	0.0473451	NA	putative colanic acid biosysnthesis UDP-glucose lipid carrier transferase	K12551	0.0075089	NA	monofunctional glycosyltransferase [EC:2.4.1.129]
K15550	0.0472831	NA	outer membrane protein, multidrug efflux system	K18095	0.00750823	M00643	multidrug efflux pump
K03781	0.0471038	NA	catalase [EC:1.11.1.6]	K08168	0.00750231	M00704	MFS transporter, DHA2 family, metal-tetracycline-proton antiporter
K03758	0.0470659	NA	arginine:ornithine antiporter / lysine permease	K02204	0.00748081	NA	homoserine kinase type II [EC:2.7.1.39]
K06970	0.0468199	NA	23S rRNA (adenine1618-N6)-methyltransferase [EC:2.1.1.181]	K06194	0.00747637	NA	lipoprotein NlpD
K03116	0.0467714	NA	sec-independent protein translocase protein TatA	K21563	0.00747592	NA	CRP/FNR family transcriptional regulator, dissimilatory nitrate respiration regulator
K01354	0.0467463	NA	oligopeptidase B [EC:3.4.21.83]	K14986	0.00747291	NA	two-component system, LuxR family, sensor kinase FixL [EC:2.7.13.3]
K03179	0.046661	M00117	4-hydroxybenzoate polyprenyltransferase [EC:2.5.1.39]	K11893	0.00747283	NA	type VI secretion system protein ImpJ
K07248	0.0465227	NA	lactaldehyde dehydrogenase / glycolaldehyde dehydrogenase [EC:1.2.1.22 1.2.1.21]	K23597	0.00746486	NA	staphostatin B
K00656	0.0464815	NA	formate C-acetyltransferase [EC:2.3.1.54]	K21564	0.00746026	NA	CRP/FNR family transcriptional regulator, nitrogen oxide reductase regulator
K04751	0.0463826	NA	nitrogen regulatory protein P-II 1	K08195	0.0074559	NA	MFS transporter, AAHS family, 4-hydroxybenzoate transporter
K00854	0.0463528	NA	xylulokinase [EC:2.7.1.17]	K03709	0.00744713	NA	DtxR family transcriptional regulator, Mn-dependent transcriptional regulator
K01256	0.0462635	NA	aminopeptidase N [EC:3.4.11.2]	K01926	0.0074277	NA	redox-sensing transcriptional repressor
K02477	0.0462327	NA	two-component system, LytTR family, response regulator	K00167	0.00742097	NA	2-oxoisovalerate dehydrogenase E1 component beta subunit [EC:1.2.4.4]
K10778	0.0461424	NA	AraC family transcriptional regulator, regulatory protein of adaptative response / methylated-DNA-[protein]-cysteine methyltransferase [EC:2.1.1.63]	K16345	0.00741875	NA	xanthine permease XanP
K02800	0.0461012	NA	mannitol PTS system EIICBA or EIICB component [EC:2.7.1.197]	K03772	0.00741322	NA	FKBP-type peptidyl-prolyl cis-trans isomerase FkpA [EC:5.2.1.8]
K08303	0.0460668	NA	putative protease [EC:3.4.-.-]	K13633	0.00740633	NA	AraC family transcriptional regulator, transcriptional activator FtrA
K22505	0.0459335	NA	type III secretion system inner membrane ring protein	K03673	0.00738981	NA	protein dithiol oxidoreductase (disulfide-forming) [EC:1.8.4.15]
K04651	0.0459211	NA	hydrogenase nickel incorporation protein HypA/HybF	K06911	0.00737852	NA	quercetin 2,3-dioxygenase [EC:1.13.11.24]
K03735	0.0459033	NA	ethanolamine ammonia-lyase large subunit [EC:4.3.1.7]	K22894	0.00736435	NA	SARP family transcriptional regulator, regulator of embCAB operon
K03446	0.0458065	NA	MFS transporter, DHA2 family, multidrug resistance protein	K08966	0.00736176	NA	2-hydroxy-3-keto-5-methylthiopentenyl-1-phosphate phosphatase [EC:3.1.3.87]
K08173	0.0458005	NA	MFS transporter, MHS family, metabolite:H+ symporter	K07218	0.00735106	NA	nitrous oxidase accessory protein
K03919	0.0456824	NA	DNA oxidative demethylase [EC:1.14.11.33]	K15771	0.00734903	NA	arabinogalactan oligomer / maltooligosaccharide transport system permease protein
K07796	0.0456595	NA	outer membrane protein, copper/silver efflux system	K11892	0.00734028	NA	type VI secretion system protein ImpK
K09018	0.0455745	M00939	pyrimidine oxygenase [EC:1.14.99.46]	K12262	0.00733493	NA	superoxide oxidase [EC:1.10.3.17]
K00797	0.0454861	M00034	spermidine synthase [EC:2.5.1.16]	K23374	0.00732483	M00875	2-[(L-alanin-3-ylcarbamoyl)methyl]-3-(2-aminoethylcarbamoyl)-2-hydroxypropanoate synthase [EC:6.3.2.55]
K00797	0.0454861	M00133	spermidine synthase [EC:2.5.1.16]	K00123	0.00731149	NA	formate dehydrogenase major subunit [EC:1.17.1.9]
K03503	0.0453551	NA	DNA polymerase V [EC:3.4.21.-]	K07778	0.00730412	NA	two-component system, NarL family, sensor histidine kinase DesK [EC:2.7.13.3]
K07054	0.0453421	NA	uncharacterized protein	K03291	0.0072998	NA	MFS transporter, SET family, sugar efflux transporter
K01239	0.0453229	NA	purine nucleosidase [EC:3.2.2.1]	K07302	0.00729885	NA	isoquinoline 1-oxidoreductase subunit alpha [EC:1.3.99.16]
K08314	0.0452381	NA	fructose-6-phosphate aldolase 2 [EC:4.1.2.-]	K07774	0.00728195	NA	two-component system, OmpR family, response regulator TctD
K07689	0.0451985	NA	two-component system, NarL family, invasion response regulator UvrY	K23264	0.00728038	NA	phosphoribosylformylglycinamidine synthase subunit PurS [EC:6.3.5.3]
K02067	0.0451549	NA	phospholipid/cholesterol/gamma-HCH transport system substrate-binding protein	K07690	0.00727985	NA	two-component system, NarL family, response regulator EvgA
K12524	0.0451443	M00016	bifunctional aspartokinase / homoserine dehydrogenase 1 [EC:2.7.2.4 1.1.1.3]	K05606	0.00726747	M00741	methylmalonyl-CoA/ethylmalonyl-CoA epimerase [EC:5.1.99.1]
K12524	0.0451443	M00017	bifunctional aspartokinase / homoserine dehydrogenase 1 [EC:2.7.2.4 1.1.1.3]	K00666	0.00726357	NA	fatty-acyl-CoA synthase [EC:6.2.1.-]
K12524	0.0451443	M00018	bifunctional aspartokinase / homoserine dehydrogenase 1 [EC:2.7.2.4 1.1.1.3]	K07306	0.00726009	NA	anaerobic dimethyl sulfoxide reductase subunit A [EC:1.8.5.3]
K00832	0.0449782	M00024	aromatic-amino-acid transaminase [EC:2.6.1.57]	K09882	0.00725171	NA	cobaltochelatase CobS [EC:6.6.1.2]
K00832	0.0449782	M00025	aromatic-amino-acid transaminase [EC:2.6.1.57]	K01318	0.00724982	NA	glutamyl endopeptidase [EC:3.4.21.19]
K00832	0.0449782	M00034	aromatic-amino-acid transaminase [EC:2.6.1.57]	K18850	0.00724203	NA	50S ribosomal protein L16 3-hydroxylase [EC:1.14.11.47]
K01815	0.0449269	NA	4-deoxy-L-threo-5-hexosulose-uronate ketol-isomerase [EC:5.3.1.17]	K07637	0.00723411	NA	two-component system, OmpR family, sensor histidine kinase PhoQ [EC:2.7.13.3]
K02523	0.0448097	NA	octaprenyl-diphosphate synthase [EC:2.5.1.90]	K19549	0.00723068	M00787	bacilysin biosynthesis transaminase BacF [EC:2.6.1.-]
K07787	0.0447957	NA	copper/silver efflux system protein	K04757	0.00722601	NA	serine/threonine-protein kinase RsbW [EC:2.7.11.1]
K04065	0.0447918	NA	hyperosmotically inducible periplasmic protein	K14731	0.00722496	NA	epsilon-lactone hydrolase [EC:3.1.1.83]
K00087	0.0447802	NA	xanthine dehydrogenase molybdenum-binding subunit [EC:1.17.1.4]	K07689	0.00722143	NA	two-component system, NarL family, invasion response regulator UvrY
K08172	0.044747	NA	MFS transporter, MHS family, shikimate and dehydroshikimate transport protein	K10979	0.00722141	NA	DNA end-binding protein Ku
K17195	0.0447444	NA	D-allulose-6-phosphate 3-epimerase [EC:5.1.3.-]	K14194	0.00720523	NA	serine-aspartate repeat-containing protein C/D/E
K00016	0.0447188	NA	L-lactate dehydrogenase [EC:1.1.1.27]	K15770	0.00720476	NA	arabinogalactan oligomer / maltooligosaccharide transport system substrate-binding protein
K02381	0.0445598	NA	FdrA protein	K20807	0.0072006	NA	nitrile hydratase subunit beta [EC:4.2.1.84]
K03642	0.0445327	NA	rare lipoprotein A	K11890	0.00719849	NA	type VI secretion system protein ImpM
K01676	0.0445172	M00009	fumarate hydratase, class I [EC:4.2.1.2]	K13598	0.0071965	NA	two-component system, NtrC family, nitrogen regulation sensor histidine kinase NtrY [EC:2.7.13.3]
K01676	0.0445172	M00011	fumarate hydratase, class I [EC:4.2.1.2]	K07152	0.00719284	NA	protein SCO1
K04074	0.0444901	NA	cell division initiation protein	K08683	0.0071739	NA	3-hydroxyacyl-CoA dehydrogenase / 3-hydroxy-2-methylbutyryl-CoA dehydrogenase [EC:1.1.1.35 1.1.1.178]
K06881	0.0444827	NA	bifunctional oligoribonuclease and PAP phosphatase NrnA [EC:3.1.3.7 3.1.13.3]	K08738	0.00717289	NA	cytochrome c
K21498	0.0443887	NA	antitoxin HigA-1	K08602	0.0071584	NA	oligoendopeptidase F [EC:3.4.24.-]
K02199	0.0443327	NA	cytochrome c biogenesis protein CcmG, thiol:disulfide interchange protein DsbE	K24131	0.00715563	NA	protease PrsW [EC:3.4.-.-]
K01637	0.0442921	M00012	isocitrate lyase [EC:4.1.3.1]	K02593	0.00715355	NA	nitrogen fixation protein NifT
K03523	0.0442178	NA	biotin transport system substrate-specific component	K02053	0.00715085	NA	putative spermidine/putrescine transport system permease protein
K01176	0.0441968	NA	alpha-amylase [EC:3.2.1.1]	K09787	0.00714914	NA	uncharacterized protein
K01421	0.0441771	NA	putative membrane protein	K11959	0.00714264	NA	urea transport system substrate-binding protein
K07713	0.0441398	NA	two-component system, NtrC family, response regulator HydG	K18302	0.00713417	M00642	membrane fusion protein, multidrug efflux system
K03091	0.0441395	NA	RNA polymerase sporulation-specific sigma factor	K14063	0.00711719	NA	AraC family transcriptional regulator, positive regulator of tynA and feaB
K03089	0.0441068	NA	RNA polymerase sigma-32 factor	K03808	0.00711432	NA	paraquat-inducible protein A
K01552	0.0440981	NA	energy-coupling factor transport system ATP-binding protein [EC:3.6.3.-]	K10778	0.00711426	NA	AraC family transcriptional regulator, regulatory protein of adaptative response / methylated-DNA-[protein]-cysteine methyltransferase [EC:2.1.1.63]
K03274	0.0440643	M00064	ADP-L-glycero-D-manno-heptose 6-epimerase [EC:5.1.3.20]	K07734	0.00710831	NA	transcriptional regulator
K01935	0.0439791	M00123	dethiobiotin synthetase [EC:6.3.3.3]	K00039	0.0071029	NA	ribitol 2-dehydrogenase [EC:1.1.1.56]
K03291	0.0438959	NA	MFS transporter, SET family, sugar efflux transporter	K23775	0.00709877	NA	MarR family transcriptional regulator, organic hydroperoxide resistance regulator
K02001	0.0438744	NA	glycine betaine/proline transport system permease protein	K02054	0.00709221	NA	putative spermidine/putrescine transport system permease protein
K23991	0.0438712	NA	multiphosphoryl transfer protein [EC:2.7.3.9 2.7.1.-]	K11900	0.00708699	NA	type VI secretion system protein ImpC
K06911	0.0438335	NA	quercetin 2,3-dioxygenase [EC:1.13.11.24]	K08973	0.00708204	NA	protoporphyrinogen IX oxidase [EC:1.3.99.-]
K02297	0.0437029	M00417	cytochrome o ubiquinol oxidase subunit II [EC:7.1.1.3]	K16243	0.00707902	M00548	phenol/toluene 2-monooxygenase (NADH) P1/A1 [EC:1.14.13.244 1.14.13.243]
K08682	0.0436701	NA	acyl carrier protein phosphodiesterase [EC:3.1.4.14]	K21645	0.00707272	NA	LysR family transcriptional regulator, hypochlorite-specific transcription factor HypT
K03534	0.0436341	NA	L-rhamnose mutarotase [EC:5.1.3.32]	K09769	0.00705515	NA	uncharacterized protein
K03293	0.0436271	NA	amino acid transporter, AAT family	K07116	0.00705436	NA	acyl-homoserine-lactone acylase [EC:3.5.1.97]
K00363	0.0435866	M00530	nitrite reductase (NADH) small subunit [EC:1.7.1.15]	K21929	0.00705	NA	uracil-DNA glycosylase [EC:3.2.2.27]
K13641	0.0435534	NA	IclR family transcriptional regulator, acetate operon repressor	K19610	0.00704127	NA	two-component system, OmpR family, response regulator PfeR
K07642	0.0435394	NA	two-component system, OmpR family, sensor histidine kinase BaeS [EC:2.7.13.3]	K07402	0.00703891	NA	xanthine dehydrogenase accessory factor
K19163	0.0435135	NA	toxin CcdB	K06419	0.00703887	NA	small acid-soluble spore protein B (major beta-type SASP)
K07085	0.0434889	NA	putative transport protein	K02189	0.00703049	M00924	cobalt-precorrin 5A hydrolase [EC:3.7.1.12]
K01051	0.0434782	NA	pectinesterase [EC:3.1.1.11]	K14204	0.00699965	NA	protein Map
K00336	0.0434565	M00144	NADH-quinone oxidoreductase subunit G [EC:7.1.1.2]	K00405	0.00699848	NA	cytochrome c oxidase cbb3-type subunit II
K17828	0.043404	NA	dihydroorotate dehydrogenase (NAD+) catalytic subunit [EC:1.3.1.14]	K07213	0.00699659	NA	copper chaperone
K02169	0.043389	NA	malonyl-CoA O-methyltransferase [EC:2.1.1.197]	K18707	0.00697943	NA	threonylcarbamoyladenosine tRNA methylthiotransferase MtaB [EC:2.8.4.5]
K07224	0.043322	NA	iron uptake system component EfeO	K03817	0.00696324	NA	ribosomal-protein-serine acetyltransferase [EC:2.3.1.-]
K12112	0.0433079	NA	evolved beta-galactosidase subunit beta	K01470	0.00696226	NA	creatinine amidohydrolase [EC:3.5.2.10]
K01241	0.0432957	NA	AMP nucleosidase [EC:3.2.2.4]	K03367	0.00695797	M00725	D-alanine--poly(phosphoribitol) ligase subunit 1 [EC:6.1.1.13]
K19335	0.0432805	NA	TetR/AcrR family transcriptional regulator, repressor for divergent bdcA	K02533	0.00693418	NA	tRNA/rRNA methyltransferase [EC:2.1.1.-]
K08973	0.0432287	M00121	protoporphyrinogen IX oxidase [EC:1.3.99.-]	K20975	0.00688751	NA	two-component system, sensor histidine kinase [EC:2.7.13.3]
K05524	0.0431104	NA	ferredoxin	K02651	0.00688485	NA	pilus assembly protein Flp/PilA
K16135	0.0430771	NA	LysR family transcriptional regulator, transcriptional activator for dmlA	K07444	0.00688184	NA	putative N6-adenine-specific DNA methylase [EC:2.1.1.-]
K08223	0.0430039	NA	MFS transporter, FSR family, fosmidomycin resistance protein	K07234	0.00687854	NA	uncharacterized protein involved in response to NO
K14623	0.0429281	NA	DNA-damage-inducible protein D	K09457	0.00686718	NA	7-cyano-7-deazaguanine reductase [EC:1.7.1.13]
K12940	0.0429258	NA	aminobenzoyl-glutamate utilization protein A	K01449	0.00686465	NA	N-acetylmuramoyl-L-alanine amidase [EC:3.5.1.28]
K19333	0.0428475	NA	IclR family transcriptional regulator, KDG regulon repressor	K04090	0.00686392	NA	indolepyruvate ferredoxin oxidoreductase [EC:1.2.7.8]
K06223	0.042793	NA	DNA adenine methylase [EC:2.1.1.72]	K07708	0.00685954	NA	two-component system, NtrC family, nitrogen regulation sensor histidine kinase GlnL [EC:2.7.13.3]
K10124	0.0427452	NA	carbohydrate-specific outer membrane porin	K17315	0.00685037	NA	glucose/mannose transport system substrate-binding protein
K21968	0.0426673	NA	Mat/Ecp fimbriae periplasmic chaperone	K05337	0.00684636	NA	ferredoxin
K02033	0.0426485	NA	peptide/nickel transport system permease protein	K07006	0.00684075	NA	uncharacterized protein
K03269	0.0426331	M00060	UDP-2,3-diacylglucosamine hydrolase [EC:3.6.1.54]	K21030	0.00683854	NA	D-ribitol-5-phosphate cytidylyltransferase [EC:2.7.7.40]
K04028	0.0426168	NA	ethanolamine utilization protein EutN	K02502	0.00682847	NA	ATP phosphoribosyltransferase regulatory subunit
K02064	0.0425369	NA	thiamine transport system substrate-binding protein	K02444	0.00682418	NA	DeoR family transcriptional regulator, glycerol-3-phosphate regulon repressor
K00677	0.0425323	M00060	UDP-N-acetylglucosamine acyltransferase [EC:2.3.1.129]	K07018	0.00681899	NA	uncharacterized protein
K01608	0.0425306	NA	tartronate-semialdehyde synthase [EC:4.1.1.47]	K11917	0.00681645	NA	sigma-54 dependent transcriptional regulator
K12262	0.0424451	NA	superoxide oxidase [EC:1.10.3.17]	K07303	0.00678527	NA	isoquinoline 1-oxidoreductase subunit beta [EC:1.3.99.16]
K04771	0.0423833	NA	serine protease Do [EC:3.4.21.107]	K00507	0.00678124	NA	stearoyl-CoA desaturase (Delta-9 desaturase) [EC:1.14.19.1]
K07404	0.0423389	M00004	6-phosphogluconolactonase [EC:3.1.1.31]	K09145	0.00678002	NA	uncharacterized protein
K07404	0.0423389	M00006	6-phosphogluconolactonase [EC:3.1.1.31]	K16165	0.00677622	NA	fumarylpyruvate hydrolase [EC:3.7.1.20]
K07404	0.0423389	M00008	6-phosphogluconolactonase [EC:3.1.1.31]	K19341	0.00677391	NA	Cu-processing system permease protein
K01118	0.0422821	NA	FMN-dependent NADH-azoreductase [EC:1.7.1.17]	K21567	0.00676525	NA	ferredoxin/flavodoxin---NADP+ reductase [EC:1.18.1.2 1.19.1.1]
K03830	0.0422615	NA	putative acetyltransferase [EC:2.3.1.-]	K14166	0.00676145	NA	copper transport protein
K16140	0.0422355	NA	putative glucuronide porin	K03480	0.00675811	NA	transcriptional antiterminator
K03926	0.0421849	NA	periplasmic divalent cation tolerance protein	K06137	0.00675136	NA	pyrroloquinoline-quinone synthase [EC:1.3.3.11]
K11737	0.0421507	NA	D-serine/D-alanine/glycine transporter	K23372	0.00675066	M00875	L-2,3-diaminopropanoate---citrate ligase [EC:6.3.2.54]
K13788	0.042118	M00579	phosphate acetyltransferase [EC:2.3.1.8]	K03189	0.00674005	NA	urease accessory protein
K19166	0.0420989	NA	mRNA interferase HigB [EC:3.1.-.-]	K07687	0.00673716	NA	two-component system, NarL family, captular synthesis response regulator RcsB
K07264	0.0420937	NA	4-amino-4-deoxy-L-arabinose transferase [EC:2.4.2.43]	K10001	0.00673575	NA	glutamate/aspartate transport system substrate-binding protein
K00853	0.0420883	NA	L-ribulokinase [EC:2.7.1.16]	K15975	0.00673259	NA	glyoxalase family protein
K07811	0.0420614	NA	trimethylamine-N-oxide reductase (cytochrome c) [EC:1.7.2.3]	K06916	0.00673169	NA	cell division protein ZapE
K07804	0.0420412	NA	putatice virulence related protein PagC	K15540	0.00673032	NA	chaperone protein EcpD
K04041	0.04197	M00003	fructose-1,6-bisphosphatase III [EC:3.1.3.11]	K21695	0.00671568	NA	protein AaeX
K05836	0.0419684	NA	GntR family transcriptional regulator, histidine utilization repressor	K09825	0.00670606	NA	Fur family transcriptional regulator, peroxide stress response regulator
K03474	0.0419465	NA	pyridoxine 5-phosphate synthase [EC:2.6.99.2]	K07679	0.00669935	NA	two-component system, NarL family, sensor histidine kinase EvgS [EC:2.7.13.3]
K00003	0.0419196	M00017	homoserine dehydrogenase [EC:1.1.1.3]	K03188	0.00668369	NA	urease accessory protein
K00003	0.0419196	M00018	homoserine dehydrogenase [EC:1.1.1.3]	K05834	0.00666902	NA	homoserine/homoserine lactone efflux protein
K04656	0.0418742	NA	hydrogenase maturation protein HypF	K01451	0.00666812	NA	hippurate hydrolase [EC:3.5.1.32]
K02805	0.0418715	NA	dTDP-4-amino-4,6-dideoxygalactose transaminase [EC:2.6.1.59]	K00154	0.00666508	NA	coniferyl-aldehyde dehydrogenase [EC:1.2.1.68]
K01754	0.0418482	M00570	threonine dehydratase [EC:4.3.1.19]	K15551	0.00665461	NA	taurine transport system substrate-binding protein
K06956	0.0418132	NA	uncharacterized protein	K22108	0.00665162	NA	TetR/AcrR family transcriptional regulator, cholesterol catabolism regulator
K03549	0.0418016	NA	KUP system potassium uptake protein	K00259	0.00664892	NA	alanine dehydrogenase [EC:1.4.1.1]
K00138	0.0417683	NA	aldehyde dehydrogenase [EC:1.2.1.-]	K02584	0.00664543	NA	Nif-specific regulatory protein
K04654	0.0417487	NA	hydrogenase expression/formation protein HypD	K06292	0.0066446	NA	spore germination protein BB
K06281	0.0417412	NA	hydrogenase large subunit [EC:1.12.99.6]	K12979	0.00663907	NA	beta-hydroxylase [EC:1.14.11.-]
K15736	0.0417321	NA	(S)-2-hydroxyglutarate dehydrogenase [EC:1.1.5.13]	K01487	0.00663299	NA	guanine deaminase [EC:3.5.4.3]
K02081	0.0417138	NA	DeoR family transcriptional regulator, aga operon transcriptional repressor	K00311	0.00662432	NA	electron-transferring-flavoprotein dehydrogenase [EC:1.5.5.1]
K06191	0.0417103	NA	glutaredoxin-like protein NrdH	K11902	0.00661296	NA	type VI secretion system protein ImpA
K06143	0.0416698	NA	inner membrane protein	K11206	0.00661257	NA	deaminated glutathione amidase [EC:3.5.1.128]
K11734	0.0416478	NA	aromatic amino acid transport protein AroP	K15778	0.00660936	NA	phosphomannomutase / phosphoglucomutase [EC:5.4.2.8 5.4.2.2]
K21511	0.0416327	NA	capsid assembly protease [EC:3.4.21.-]	K01428	0.00660635	NA	urease subunit alpha [EC:3.5.1.5]
K02031	0.0414956	NA	peptide/nickel transport system ATP-binding protein	K00166	0.00660595	NA	2-oxoisovalerate dehydrogenase E1 component alpha subunit [EC:1.2.4.4]
K07229	0.0414757	NA	ferric-chelate reductase (NADPH) [EC:1.16.1.9]	K12132	0.00660413	NA	eukaryotic-like serine/threonine-protein kinase [EC:2.7.11.1]
K05520	0.0414705	NA	protease I [EC:3.5.1.124]	K01271	0.0066036	NA	Xaa-Pro dipeptidase [EC:3.4.13.9]
K08683	0.0414164	NA	3-hydroxyacyl-CoA dehydrogenase / 3-hydroxy-2-methylbutyryl-CoA dehydrogenase [EC:1.1.1.35 1.1.1.178]	K00305	0.00660215	NA	sarcosine oxidase, subunit gamma [EC:1.5.3.1]
K00029	0.041414	M00169	malate dehydrogenase (oxaloacetate-decarboxylating)(NADP+) [EC:1.1.1.40]	K00252	0.00658512	NA	glutaryl-CoA dehydrogenase [EC:1.3.8.6]
K08138	0.0414015	NA	MFS transporter, SP family, xylose:H+ symportor	K01061	0.00658364	NA	carboxymethylenebutenolidase [EC:3.1.1.45]
K06024	0.0414	NA	segregation and condensation protein B	K03328	0.00657798	NA	polysaccharide transporter, PST family
K02415	0.041376	NA	flagellar FliL protein	K07346	0.00656536	NA	fimbrial chaperone protein
K02568	0.0413735	M00530	nitrate reductase (cytochrome), electron transfer subunit	K10211	0.00656511	NA	4,4'-diaponeurosporenoate glycosyltransferase [EC:2.4.1.-]
K10441	0.0413507	NA	ribose transport system ATP-binding protein [EC:7.5.2.7]	K00980	0.00656214	NA	glycerol-3-phosphate cytidylyltransferase [EC:2.7.7.39]
K13639	0.0413142	NA	MerR family transcriptional regulator, redox-sensitive transcriptional activator SoxR	K18131	0.00655701	M00718	MarR family transcriptional regulator, repressor of the mexAB-oprM multidrug resistance operon
K07552	0.0412749	NA	MFS transporter, DHA1 family, multidrug resistance protein	K10126	0.00654857	NA	two-component system, NtrC family, C4-dicarboxylate transport response regulator DctD
K23124	0.0412623	NA	5-oxoprolinase (ATP-hydrolysing) subunit C [EC:3.5.2.9]	K07084	0.00654396	NA	putative amino acid transporter
K03385	0.0411963	M00530	nitrite reductase (cytochrome c-552) [EC:1.7.2.2]	K01493	0.00653797	NA	dCMP deaminase [EC:3.5.4.12]
K03270	0.0411747	M00063	3-deoxy-D-manno-octulosonate 8-phosphate phosphatase (KDO 8-P phosphatase) [EC:3.1.3.45]	K18138	0.00652736	M00718	multidrug efflux pump
K22391	0.0411365	M00126	GTP cyclohydrolase I [EC:3.5.4.16]	K13787	0.00650209	M00365	geranylgeranyl diphosphate synthase, type I [EC:2.5.1.1 2.5.1.10 2.5.1.29]
K18890	0.0411098	NA	ATP-binding cassette, subfamily B, multidrug efflux pump	K02454	0.00649411	NA	general secretion pathway protein E [EC:7.4.2.8]
K03150	0.0410999	M00127	2-iminoacetate synthase [EC:4.1.99.19]	K00625	0.00649294	NA	phosphate acetyltransferase [EC:2.3.1.8]
K05367	0.0410868	NA	penicillin-binding protein 1C [EC:2.4.1.129]	K02828	0.00649156	M00416	cytochrome aa3-600 menaquinol oxidase subunit III [EC:7.1.1.5]
K04014	0.041053	NA	protein NrfC	K01771	0.00649113	NA	1-phosphatidylinositol phosphodiesterase [EC:4.6.1.13]
K04019	0.0410286	NA	ethanolamine utilization protein EutA	K21721	0.00647973	M00875	N-[(2S)-2-amino-2-carboxyethyl]-L-glutamate dehydrogenase [EC:1.5.1.51]
K08351	0.0409864	NA	biotin/methionine sulfoxide reductase [EC:1.-.-.-]	K01070	0.00646822	NA	S-formylglutathione hydrolase [EC:3.1.2.12]
K05781	0.0409601	NA	putative phosphonate transport system ATP-binding protein	K09969	0.00646529	NA	general L-amino acid transport system substrate-binding protein
K02000	0.0409448	NA	glycine betaine/proline transport system ATP-binding protein [EC:7.6.2.9]	K13583	0.00645984	NA	GcrA cell cycle regulator
K09136	0.0409253	NA	ribosomal protein S12 methylthiotransferase accessory factor	K05836	0.00645983	NA	GntR family transcriptional regulator, histidine utilization repressor
K03633	0.0409172	NA	chromosome partition protein MukF	K05566	0.00645573	NA	multicomponent Na+:H+ antiporter subunit B
K22015	0.0409106	NA	formate dehydrogenase (acceptor) [EC:1.17.99.7]	K03821	0.00645311	NA	polyhydroxyalkanoate synthase subunit PhaC [EC:2.3.1.-]
K07735	0.0408936	NA	putative transcriptional regulator	K17758	0.00645298	NA	ADP-dependent NAD(P)H-hydrate dehydratase [EC:4.2.1.136]
K09973	0.0408511	NA	uncharacterized protein	K07308	0.00645225	NA	anaerobic dimethyl sulfoxide reductase subunit C
K23237	0.0408448	NA	AraC family transcriptional regulator, melibiose operon regulatory protein	K02283	0.00645135	NA	pilus assembly protein CpaF [EC:7.4.2.8]
K00748	0.0408289	M00060	lipid-A-disaccharide synthase [EC:2.4.1.182]	K15587	0.0064473	NA	nickel transport system ATP-binding protein [EC:7.2.2.11]
K02527	0.0408254	M00060	3-deoxy-D-manno-octulosonic-acid transferase [EC:2.4.99.12 2.4.99.13 2.4.99.14 2.4.99.15]	K06413	0.00644217	NA	stage V sporulation protein K
K02843	0.040815	NA	heptosyltransferase II [EC:2.4.-.-]	K03928	0.00644033	NA	carboxylesterase [EC:3.1.1.1]
K09791	0.040807	NA	uncharacterized protein	K06952	0.00643968	NA	uncharacterized protein
K07661	0.0407702	NA	two-component system, OmpR family, response regulator RstA	K01880	0.00643925	NA	glycyl-tRNA synthetase [EC:6.1.1.14]
K21602	0.0407393	NA	IclR family transcriptional regulator, carbohydrate utilization repressor	K01597	0.00643469	M00095	diphosphomevalonate decarboxylase [EC:4.1.1.33]
K02619	0.0406745	NA	4-amino-4-deoxychorismate lyase [EC:4.1.3.38]	K11621	0.00643303	NA	lia operon protein LiaG
K00681	0.0406546	NA	gamma-glutamyltranspeptidase / glutathione hydrolase [EC:2.3.2.2 3.4.19.13]	K21600	0.00643057	NA	CsoR family transcriptional regulator, copper-sensing transcriptional repressor
K06726	0.0406335	NA	D-ribose pyranase [EC:5.4.99.62]	K10831	0.00642872	NA	taurine transport system ATP-binding protein [EC:7.6.2.7]
K01480	0.0406332	M00133	agmatinase [EC:3.5.3.11]	K12239	0.0064285	NA	dihydroaeruginoic acid synthetase
K03578	0.0406225	NA	ATP-dependent helicase HrpA [EC:3.6.4.13]	K08717	0.0064238	NA	urea transporter
K09021	0.0406182	M00939	aminoacrylate peracid reductase	K11960	0.00642263	NA	urea transport system permease protein
K04033	0.0406178	NA	AraC family transcriptional regulator, ethanolamine operon transcriptional activator	K03119	0.0064209	NA	taurine dioxygenase [EC:1.14.11.17]
K23241	0.0405994	NA	MFS transporter, DHA1 family, multidrug resistance protein	K00822	0.00641565	NA	beta-alanine--pyruvate transaminase [EC:2.6.1.18]
K06075	0.0405925	NA	MarR family transcriptional regulator, transcriptional regulator for hemolysin	K01819	0.00641439	NA	galactose-6-phosphate isomerase [EC:5.3.1.26]
K09774	0.0405475	NA	lipopolysaccharide export system protein LptA	K17230	0.00640388	NA	cytochrome subunit of sulfide dehydrogenase
K10972	0.0405213	NA	LysR family transcriptional regulator, transcriptional activator of the allD operon	K09005	0.00639468	NA	uncharacterized protein
K09798	0.0404929	NA	uncharacterized protein	K02278	0.00639353	NA	prepilin peptidase CpaA [EC:3.4.23.43]
K03305	0.0404852	NA	proton-dependent oligopeptide transporter, POT family	K00407	0.00639343	NA	cytochrome c oxidase cbb3-type subunit IV
K15723	0.0404749	NA	SecY interacting protein Syd	K21416	0.00638245	NA	acetoin:2,6-dichlorophenolindophenol oxidoreductase subunit alpha [EC:1.1.1.-]
K21695	0.0404417	NA	protein AaeX	K09883	0.0063728	NA	cobaltochelatase CobT [EC:6.6.1.2]
K00970	0.0403937	NA	poly(A) polymerase [EC:2.7.7.19]	K01640	0.00637264	M00036	hydroxymethylglutaryl-CoA lyase [EC:4.1.3.4]
K18922	0.0403911	NA	protein HokE	K06886	0.00636833	NA	hemoglobin
K07792	0.0403368	NA	anaerobic C4-dicarboxylate transporter DcuB	K09928	0.00636624	NA	uncharacterized protein
K09893	0.0403267	NA	regulator of ribonuclease activity B	K05774	0.00635363	NA	ribose 1,5-bisphosphokinase [EC:2.7.4.23]
K13936	0.0402469	NA	malonate transporter and related proteins	K13290	0.00634901	NA	serine---pyruvate transaminase [EC:2.6.1.51]
K07456	0.0402378	NA	DNA mismatch repair protein MutS2	K10111	0.00634807	NA	multiple sugar transport system ATP-binding protein [EC:3.6.3.-]
K01805	0.0402343	NA	xylose isomerase [EC:5.3.1.5]	K05839	0.0063267	NA	haemolysin expression modulating protein
K02466	0.0401802	NA	glucitol operon activator protein	K03091	0.00632619	NA	RNA polymerase sporulation-specific sigma factor
K07038	0.0401173	NA	inner membrane protein	K07037	0.0063189	NA	cyclic-di-AMP phosphodiesterase PgpH [EC:3.1.4.-]
K21088	0.040073	NA	diguanylate cyclase [EC:2.7.7.65]	K04747	0.00631749	NA	nitric oxide reductase NorF protein
K04655	0.0400648	NA	hydrogenase expression/formation protein HypE	K12256	0.00630573	NA	putrescine---pyruvate transaminase [EC:2.6.1.113]
K03207	0.0400481	NA	colanic acid biosynthesis protein WcaH [EC:3.6.1.-]	K14205	0.00630329	M00726	phosphatidylglycerol lysyltransferase [EC:2.3.2.3]
K16322	0.0400415	NA	low-affinity inorganic phosphate transporter	K23122	0.00630106	M00949	staphylopine/pseudopaline/yersinopine synthase [EC:1.5.1.52 1.5.1.-]
K00991	0.0399763	M00096	2-C-methyl-D-erythritol 4-phosphate cytidylyltransferase [EC:2.7.7.60]	K08974	0.00628805	NA	putative membrane protein
K13255	0.0399713	NA	ferric iron reductase protein FhuF	K14998	0.00628386	NA	surfeit locus 1 family protein
K04091	0.0399473	NA	alkanesulfonate monooxygenase [EC:1.14.14.5]	K05524	0.00628124	NA	ferredoxin
K08354	0.0399306	NA	thiosulfate reductase cytochrome b subunit	K22187	0.0062781	NA	alpha-ketoglutaric semialdehyde dehydrogenase [EC:1.2.1.-]
K02431	0.0399127	NA	L-fucose mutarotase [EC:5.1.3.29]	K02076	0.00627656	NA	Fur family transcriptional regulator, zinc uptake regulator
K00984	0.0398852	NA	streptomycin 3""-adenylyltransferase [EC:2.7.7.47]	K06881	0.00627298	NA	bifunctional oligoribonuclease and PAP phosphatase NrnA [EC:3.1.3.7 3.1.13.3]
K06940	0.0398407	NA	uncharacterized protein	K07533	0.0062698	NA	foldase protein PrsA [EC:5.2.1.8]
K04753	0.0398287	NA	suppressor of ftsI	K00175	0.00625072	NA	2-oxoglutarate/2-oxoacid ferredoxin oxidoreductase subunit beta [EC:1.2.7.3 1.2.7.11]
K13051	0.0397814	NA	L-asparaginase / beta-aspartyl-peptidase [EC:3.5.1.1 3.4.19.5]	K05555	0.00624802	M00778	cyclase [EC:4.-.-.-]
K02819	0.0397648	NA	trehalose PTS system EIIBC or EIIBCA component [EC:2.7.1.201]	K18326	0.00624398	NA	MFS transporter, DHA2 family, multidrug resistance protein
K11924	0.0397176	NA	DtxR family transcriptional regulator, manganese transport regulator	K01434	0.0062429	NA	penicillin G amidase [EC:3.5.1.11]
K03835	0.0397155	NA	tryptophan-specific transport protein	K00411	0.00624276	NA	ubiquinol-cytochrome c reductase iron-sulfur subunit [EC:7.1.1.8]
K10974	0.0396529	NA	cytosine permease	K18704	0.00624092	NA	CDP-ribitol ribitolphosphotransferase / teichoic acid ribitol-phosphate polymerase [EC:2.7.8.14 2.7.8.47]
K07112	0.0394859	NA	uncharacterized protein	K16842	0.00624064	M00546	allantoinase [EC:3.5.2.5]
K15777	0.0394439	NA	4,5-DOPA dioxygenase extradiol [EC:1.13.11.-]	K00303	0.00622847	NA	sarcosine oxidase, subunit beta [EC:1.5.3.1]
K23256	0.0394337	NA	NADPH-dependent curcumin reductase [EC:1.3.1.-]	K11473	0.00622363	NA	glycolate oxidase iron-sulfur subunit
K07798	0.0394262	NA	membrane fusion protein, copper/silver efflux system	K05571	0.00621524	NA	multicomponent Na+:H+ antiporter subunit G
K12975	0.03938	NA	KDO II ethanolaminephosphotransferase [EC:2.7.8.42]	K11901	0.00621502	NA	type VI secretion system protein ImpB
K01611	0.0393415	M00034	S-adenosylmethionine decarboxylase [EC:4.1.1.50]	K07456	0.00621433	NA	DNA mismatch repair protein MutS2
K01611	0.0393415	M00133	S-adenosylmethionine decarboxylase [EC:4.1.1.50]	K06351	0.00620005	NA	inhibitor of KinA
K02019	0.0393287	NA	molybdate transport system regulatory protein	K03288	0.00619833	NA	MFS transporter, MHS family, citrate/tricarballylate:H+ symporter
K16012	0.0392863	NA	ATP-binding cassette, subfamily C, bacterial CydC	K00004	0.0061962	NA	(R,R)-butanediol dehydrogenase / meso-butanediol dehydrogenase / diacetyl reductase [EC:1.1.1.4 1.1.1.- 1.1.1.303]
K00337	0.0392622	M00144	NADH-quinone oxidoreductase subunit H [EC:7.1.1.2]	K16509	0.00619241	NA	regulatory protein spx
K03893	0.0391915	NA	arsenical pump membrane protein	K11535	0.00619221	NA	nucleoside transport protein
K02453	0.039155	NA	general secretion pathway protein D	K20938	0.00618836	NA	long-chain alkane monooxygenase [EC:1.14.14.28]
K22443	0.0391437	NA	carnitine monooxygenase subunit [EC:1.14.13.239]	K00673	0.00618499	NA	arginine N-succinyltransferase [EC:2.3.1.109]
K06006	0.0391146	NA	periplasmic protein CpxP/Spy	K11938	0.00618141	NA	HMP-PP phosphatase [EC:3.6.1.-]
K16345	0.0390579	NA	xanthine permease XanP	K03816	0.00617493	NA	xanthine phosphoribosyltransferase [EC:2.4.2.22]
K00137	0.0390194	NA	aminobutyraldehyde dehydrogenase [EC:1.2.1.19]	K14052	0.00617436	NA	putrescine importer
K09762	0.0390127	NA	uncharacterized protein	K15311	0.00616718	NA	polyketide biosynthesis 3-hydroxy-3-methylglutaryl-CoA synthase-like enzyme PksG
K03658	0.0390014	NA	DNA helicase IV [EC:3.6.4.12]	K03523	0.00616484	NA	biotin transport system substrate-specific component
K08224	0.0389775	NA	MFS transporter, YNFM family, putative membrane transport protein	K13735	0.00616478	NA	adhesin/invasin
K03770	0.0389617	NA	peptidyl-prolyl cis-trans isomerase D [EC:5.2.1.8]	K18069	0.00616065	M00623	phthalate 4,5-dioxygenase reductase component [EC:1.18.1.-]
K00574	0.0389061	NA	cyclopropane-fatty-acyl-phospholipid synthase [EC:2.1.1.79]	K22186	0.00615943	NA	xylonate dehydratase [EC:4.2.1.82]
K01185	0.038879	NA	lysozyme [EC:3.2.1.17]	K01724	0.00614788	NA	4a-hydroxytetrahydrobiopterin dehydratase [EC:4.2.1.96]
K15773	0.0388716	NA	HTH-type transcriptional regulator / antitoxin HipB	K03293	0.00614575	NA	amino acid transporter, AAT family
K11106	0.0388691	NA	L-tartrate/succinate antiporter	K19689	0.00614142	NA	aminopeptidase [EC:3.4.11.-]
K01146	0.0388441	NA	protein Xni	K14201	0.00614099	NA	clumping factor A
K07666	0.038794	NA	two-component system, OmpR family, response regulator QseB	K11907	0.00612174	NA	type VI secretion system protein VasG
K03289	0.0387913	NA	MFS transporter, NHS family, nucleoside permease	K02655	0.00612104	NA	type IV pilus assembly protein PilE
K01011	0.0387891	NA	thiosulfate/3-mercaptopyruvate sulfurtransferase [EC:2.8.1.1 2.8.1.2]	K01907	0.00611707	NA	acetoacetyl-CoA synthetase [EC:6.2.1.16]
K11892	0.0387763	NA	type VI secretion system protein ImpK	K04080	0.00611493	NA	molecular chaperone IbpA
K19265	0.0387726	NA	L-glyceraldehyde 3-phosphate reductase [EC:1.1.1.-]	K14287	0.00611086	NA	methionine transaminase [EC:2.6.1.88]
K02364	0.038766	NA	enterobactin synthetase component F [EC:6.3.2.14]	K15662	0.00609862	NA	iturin family lipopeptide synthetase B
K18800	0.0387418	M00117	2-polyprenylphenol 6-hydroxylase [EC:1.14.13.240]	K02279	0.00609471	NA	pilus assembly protein CpaB
K00111	0.0387213	NA	glycerol-3-phosphate dehydrogenase [EC:1.1.5.3]	K02443	0.00609265	NA	glycerol uptake operon antiterminator
K08156	0.0386768	NA	MFS transporter, DHA1 family, arabinose polymer utilization protein	K00992	0.00609227	NA	N-acetyl-alpha-D-muramate 1-phosphate uridylyltransferase [EC:2.7.7.99]
K01007	0.038608	NA	pyruvate, water dikinase [EC:2.7.9.2]	K00243	0.00609165	NA	uncharacterized protein
K05788	0.0385603	NA	integration host factor subunit beta	K23253	0.00608899	NA	PucR family transcriptional regulator, proline-responsive transcriptional activator
K02783	0.038559	NA	glucitol/sorbitol PTS system EIIC component	K10016	0.00608708	NA	histidine transport system permease protein
K00121	0.038504	NA	S-(hydroxymethyl)glutathione dehydrogenase / alcohol dehydrogenase [EC:1.1.1.284 1.1.1.1]	K06299	0.00607744	NA	spore germination protein PA
K02478	0.0384967	NA	two-component system, LytTR family, sensor kinase [EC:2.7.13.3]	K07228	0.00607686	NA	TrkA domain protein
K12138	0.0384886	NA	hydrogenase-4 component C [EC:1.-.-.-]	K09809	0.00606778	NA	CDP-glycerol glycerophosphotransferase [EC:2.7.8.12]
K07009	0.0384227	NA	lipid II isoglutaminyl synthase (glutamine-hydrolysing) [EC:6.3.5.13]	K00158	0.00606738	NA	pyruvate oxidase [EC:1.2.3.3]
K01911	0.0384064	M00116	O-succinylbenzoic acid---CoA ligase [EC:6.2.1.26]	K03300	0.00606296	NA	citrate-Mg2+:H+ or citrate-Ca2+:H+ symporter, CitMHS family
K03784	0.0383915	NA	purine-nucleoside phosphorylase [EC:2.4.2.1]	K18967	0.00604962	NA	diguanylate cyclase [EC:2.7.7.65]
K18697	0.0383602	NA	phosphatidylglycerophosphatase C [EC:3.1.3.27]	K11472	0.00604796	NA	glycolate oxidase FAD binding subunit
K07148	0.038358	NA	uncharacterized protein	K18682	0.00603615	NA	ribonucrease Y [EC:3.1.-.-]
K03322	0.0383534	NA	manganese transport protein	K11961	0.00603409	NA	urea transport system permease protein
K07251	0.0383409	NA	thiamine kinase [EC:2.7.1.89]	K06340	0.00602521	NA	spore coat protein V
K07156	0.0383163	NA	copper resistance protein C	K19077	0.00602491	M00725	two-component system, OmpR family, sensor histidine kinase GraS [EC:2.7.13.3]
K03273	0.0383008	M00064	D-glycero-D-manno-heptose 1,7-bisphosphate phosphatase [EC:3.1.3.82 3.1.3.83]	K19077	0.00602491	M00726	two-component system, OmpR family, sensor histidine kinase GraS [EC:2.7.13.3]
K24082	0.0382997	NA	LysR family transcriptional regulator, regulator of peptidoglycan recycling	K19077	0.00602491	M00730	two-component system, OmpR family, sensor histidine kinase GraS [EC:2.7.13.3]
K01919	0.0382088	M00118	glutamate--cysteine ligase [EC:6.3.2.2]	K22468	0.00602255	NA	polyphosphate kinase [EC:2.7.4.1]
K16013	0.0381535	NA	ATP-binding cassette, subfamily C, bacterial CydD	K02280	0.00602113	NA	pilus assembly protein CpaC
K03559	0.0381518	NA	biopolymer transport protein ExbD	K09924	0.00601568	NA	uncharacterized protein
K02526	0.0380487	NA	2-keto-3-deoxygluconate permease	K23265	0.00600861	NA	phosphoribosylformylglycinamidine synthase subunit PurQ / glutaminase [EC:6.3.5.3 3.5.1.2]
K11739	0.0380187	NA	bacteriophage N4 adsorption protein A	K21959	0.00600702	NA	LysR family transcriptional regulator, cell division regulator
K11900	0.038018	NA	type VI secretion system protein ImpC	K22250	0.00600621	NA	poly(3-hydroxyoctanoate) depolymerase [EC:3.1.1.76]
K03442	0.0380145	NA	small conductance mechanosensitive channel	K02488	0.00600599	NA	two-component system, cell cycle response regulator [EC:2.7.7.65]
K03834	0.0379998	NA	tyrosine-specific transport protein	K11896	0.00599658	NA	type VI secretion system protein ImpG
K00951	0.0379868	NA	GTP pyrophosphokinase [EC:2.7.6.5]	K08153	0.00599337	NA	MFS transporter, DHA1 family, multidrug resistance protein
K02017	0.037925	NA	molybdate transport system ATP-binding protein [EC:7.3.2.5]	K12574	0.00599275	NA	ribonuclease J [EC:3.1.-.-]
K15461	0.0379172	NA	tRNA 5-methylaminomethyl-2-thiouridine biosynthesis bifunctional protein [EC:2.1.1.61 1.5.-.-]	K03048	0.00599165	NA	DNA-directed RNA polymerase subunit delta
K22014	0.0379103	NA	terminase small subunit / prophage DNA-packing protein	K00841	0.00599051	M00525	aminotransferase [EC:2.6.1.-]
K10544	0.0379077	NA	D-xylose transport system permease protein	K06138	0.00599033	NA	pyrroloquinoline quinone biosynthesis protein D
K00852	0.0379077	NA	ribokinase [EC:2.7.1.15]	K09705	0.00598885	NA	uncharacterized protein
K17463	0.0378055	M00061	2-dehydro-3-deoxy-phosphogluconate aldolase [EC:4.1.2.14]	K02595	0.00597937	NA	nitrogenase-stabilizing/protective protein
K17463	0.0378055	M00631	2-dehydro-3-deoxy-phosphogluconate aldolase [EC:4.1.2.14]	K11906	0.00597677	NA	type VI secretion system protein VasD
K00331	0.0377834	M00144	NADH-quinone oxidoreductase subunit B [EC:7.1.1.2]	K13589	0.00597066	NA	two-component system, cell cycle response regulator CpdR
K08311	0.0377114	NA	putative (di)nucleoside polyphosphate hydrolase [EC:3.6.1.-]	K11734	0.00597017	NA	aromatic amino acid transport protein AroP
K03761	0.0376995	NA	MFS transporter, MHS family, alpha-ketoglutarate permease	K01727	0.0059642	NA	hyaluronate lyase [EC:4.2.2.1]
K19353	0.0376976	NA	heptose-I-phosphate ethanolaminephosphotransferase [EC:2.7.8.-]	K03489	0.00595945	NA	GntR family transcriptional regulator, transcriptional regulator of bglA
K01690	0.0376372	M00008	phosphogluconate dehydratase [EC:4.2.1.12]	K01421	0.00595776	NA	putative membrane protein
K00639	0.0376326	NA	glycine C-acetyltransferase [EC:2.3.1.29]	K06360	0.00594493	NA	response regulator aspartate phosphatase B [EC:3.1.-.-]
K08092	0.0376165	NA	3-dehydro-L-gulonate 2-dehydrogenase [EC:1.1.1.130]	K18955	0.00592489	NA	WhiB family transcriptional regulator, redox-sensing transcriptional regulator
K04652	0.0375906	NA	hydrogenase nickel incorporation protein HypB	K03346	0.0059218	NA	replication initiation and membrane attachment protein
K00979	0.0375842	M00063	3-deoxy-manno-octulosonate cytidylyltransferase (CMP-KDO synthetase) [EC:2.7.7.38]	K02672	0.00591921	NA	type IV pilus assembly protein PilW
K23721	0.0375626	NA	apo-salmochelin esterase [EC:3.1.1.107]	K13614	0.00591901	NA	polyketide synthase PksN
K09772	0.0375492	NA	cell division inhibitor SepF	K03481	0.00591066	NA	RpiR family transcriptional regulator, glv operon transcriptional regulator
K07346	0.0375405	NA	fimbrial chaperone protein	K02459	0.00590505	NA	general secretion pathway protein J
K24090	0.0375219	NA	recombination-promoting nuclease RpnE	K00121	0.00590451	NA	S-(hydroxymethyl)glutathione dehydrogenase / alcohol dehydrogenase [EC:1.1.1.284 1.1.1.1]
K00005	0.0374821	NA	glycerol dehydrogenase [EC:1.1.1.6]	K16567	0.00589713	NA	exopolysaccharide production protein ExoQ
K11535	0.0374757	NA	nucleoside transport protein	K00570	0.00589664	NA	phosphatidylethanolamine/phosphatidyl-N-methylethanolamine N-methyltransferase [EC:2.1.1.17 2.1.1.71]
K03651	0.0374684	NA	3',5'-cyclic-AMP phosphodiesterase [EC:3.1.4.53]	K12257	0.00589472	NA	SecD/SecF fusion protein
K12288	0.0374595	NA	pilus assembly protein HofM	K09919	0.0058787	NA	uncharacterized protein
K03638	0.0374445	M00880	molybdopterin adenylyltransferase [EC:2.7.7.75]	K02258	0.00587853	NA	cytochrome c oxidase assembly protein subunit 11
K00675	0.0374184	NA	N-hydroxyarylamine O-acetyltransferase [EC:2.3.1.118]	K13893	0.00587794	NA	microcin C transport system substrate-binding protein
K03312	0.0373863	NA	glutamate:Na+ symporter, ESS family	K15668	0.00587253	NA	fengycin family lipopeptide synthetase E
K01226	0.0373674	NA	trehalose-6-phosphate hydrolase [EC:3.2.1.93]	K03366	0.00586886	NA	meso-butanediol dehydrogenase / (S,S)-butanediol dehydrogenase / diacetyl reductase [EC:1.1.1.- 1.1.1.76 1.1.1.304]
K03271	0.0373642	M00064	D-sedoheptulose 7-phosphate isomerase [EC:5.3.1.28]	K00122	0.0058678	NA	formate dehydrogenase [EC:1.17.1.9]
K22900	0.0373265	NA	tRNA (adenine37-N6)-methyltransferase [EC:2.1.1.-]	K09764	0.00585246	NA	uncharacterized protein
K07351	0.0373253	NA	fimbrial protein	K01432	0.00584578	M00038	arylformamidase [EC:3.5.1.9]
K07706	0.0373187	NA	two-component system, LytTR family, sensor histidine kinase AgrC [EC:2.7.13.3]	K01432	0.00584578	M00912	arylformamidase [EC:3.5.1.9]
K02412	0.0373032	NA	flagellum-specific ATP synthase [EC:7.4.2.8]	K06215	0.00584488	NA	pyridoxal 5'-phosphate synthase pdxS subunit [EC:4.3.3.6]
K11907	0.0372789	NA	type VI secretion system protein VasG	K21021	0.00584282	NA	diguanylate cyclase [EC:2.7.7.65]
K21966	0.0372603	NA	Mat/Ecp fimbriae outer membrane usher protein	K15973	0.00583936	NA	MarR family transcriptional regulator, 2-MHQ and catechol-resistance regulon repressor
K07390	0.0372222	NA	monothiol glutaredoxin	K16244	0.0058337	M00548	phenol/toluene 2-monooxygenase (NADH) P2/A2 [EC:1.14.13.244 1.14.13.243]
K02440	0.0371968	NA	glycerol uptake facilitator protein	K23786	0.00583046	NA	5'-3' exonuclease [EC:3.1.11.-]
K04095	0.037186	NA	cell filamentation protein	K07233	0.00582264	NA	copper resistance protein B
K03827	0.0371428	NA	putative acetyltransferase [EC:2.3.1.-]	K15782	0.00581905	NA	Lrp/AsnC family transcriptional regulator, regulator of ectoine-degradation genes
K10111	0.0370393	NA	multiple sugar transport system ATP-binding protein [EC:3.6.3.-]	K02229	0.00581258	NA	precorrin-3B synthase [EC:1.14.13.83]
K16210	0.0370247	NA	oligogalacturonide transporter	K22226	0.00580833	M00847	Fe-coproporphyrin III synthase
K05594	0.0370235	NA	ElaB protein	K17213	0.00580785	NA	inositol transport system substrate-binding protein
K01447	0.0369897	NA	N-acetylmuramoyl-L-alanine amidase [EC:3.5.1.28]	K09986	0.00579959	NA	uncharacterized protein
K06916	0.0369382	NA	cell division protein ZapE	K00712	0.00579708	NA	poly(glycerol-phosphate) alpha-glucosyltransferase [EC:2.4.1.52]
K02750	0.0369162	NA	alpha-glucoside PTS system EIICB component [EC:2.7.1.208 2.7.1.-]	K12553	0.00579395	NA	penicillin-binding protein 3 [EC:3.4.-.-]
K15735	0.0369153	NA	GntR family transcriptional regulator, carbon starvation induced regulator	K00023	0.00578929	NA	acetoacetyl-CoA reductase [EC:1.1.1.36]
K00156	0.0368818	NA	pyruvate dehydrogenase (quinone) [EC:1.2.5.1]	K17228	0.00578637	NA	dimethylsulfone monooxygenase [EC:1.14.14.35]
K21512	0.0368568	NA	terminase, large subunit [EC:3.1.21.4]	K24116	0.0057861	NA	N-acetyl-S-(2-succino)cysteine monooxygenase [EC:1.14.-.-]
K03640	0.0368392	NA	peptidoglycan-associated lipoprotein	K01623	0.00578512	M00165	fructose-bisphosphate aldolase, class I [EC:4.1.2.13]
K01531	0.0368386	NA	P-type Mg2+ transporter [EC:7.2.2.14]	K01623	0.00578512	M00167	fructose-bisphosphate aldolase, class I [EC:4.1.2.13]
K21976	0.0367913	NA	probable RcsB/C two-component-system connector, global regulator of biofilm formation and acid-resistance	K00496	0.00578276	NA	alkane 1-monooxygenase [EC:1.14.15.3]
K07641	0.0367878	NA	two-component system, OmpR family, sensor histidine kinase CreC [EC:2.7.13.3]	K00406	0.00577752	NA	cytochrome c oxidase cbb3-type subunit III
K00020	0.0367628	NA	3-hydroxyisobutyrate dehydrogenase [EC:1.1.1.31]	K09926	0.00577278	NA	uncharacterized protein
K16291	0.0367161	NA	L,D-transpeptidase ErfK/SrfK	K19552	0.005771	NA	MFS transporter, DHA3 family, bacilysin exporter BacE
K07307	0.0367003	NA	anaerobic dimethyl sulfoxide reductase subunit B	K19955	0.00576932	NA	alcohol dehydrogenase [EC:1.1.1.-]
K02055	0.0366912	NA	putative spermidine/putrescine transport system substrate-binding protein	K07078	0.00576877	NA	uncharacterized protein
K13480	0.0366799	NA	xanthine dehydrogenase iron-sulfur-binding subunit	K00372	0.00576863	NA	assimilatory nitrate reductase catalytic subunit [EC:1.7.99.-]
K03668	0.0366483	NA	heat shock protein HslJ	K19340	0.005766	NA	Cu-processing system ATP-binding protein
K10710	0.0366386	NA	fructoselysine 6-kinase [EC:2.7.1.218]	K02452	0.00575965	NA	general secretion pathway protein C
K01706	0.0366322	NA	glucarate dehydratase [EC:4.2.1.40]	K00412	0.0057584	NA	ubiquinol-cytochrome c reductase cytochrome b subunit
K08177	0.0366248	NA	MFS transporter, OFA family, oxalate/formate antiporter	K12972	0.00574344	NA	glyoxylate/hydroxypyruvate reductase [EC:1.1.1.79 1.1.1.81]
K03119	0.0365754	NA	taurine dioxygenase [EC:1.14.11.17]	K09386	0.00574062	NA	uncharacterized protein
K03746	0.0365588	NA	DNA-binding protein H-NS	K03429	0.00573952	NA	processive 1,2-diacylglycerol beta-glucosyltransferase [EC:2.4.1.315]
K01058	0.0365545	NA	phospholipase A1/A2 [EC:3.1.1.32 3.1.1.4]	K00869	0.00573508	M00095	mevalonate kinase [EC:2.7.1.36]
K01926	0.0365211	NA	redox-sensing transcriptional repressor	K07104	0.00573494	M00569	catechol 2,3-dioxygenase [EC:1.13.11.2]
K11931	0.0364932	NA	poly-beta-1,6-N-acetyl-D-glucosamine N-deacetylase [EC:3.5.1.-]	K07584	0.00573445	NA	uncharacterized protein
K03563	0.0364851	NA	carbon storage regulator	K13895	0.00573117	NA	microcin C transport system permease protein
K01433	0.0364541	NA	formyltetrahydrofolate deformylase [EC:3.5.1.10]	K06205	0.00572816	NA	MioC protein
K01425	0.0364135	NA	glutaminase [EC:3.5.1.2]	K07168	0.00572421	NA	CBS domain-containing membrane protein
K02779	0.036379	NA	glucose PTS system EIICB or EIICBA component [EC:2.7.1.199]	K02462	0.00571317	NA	general secretion pathway protein M
K15584	0.0363698	NA	nickel transport system substrate-binding protein	K01969	0.00571309	NA	3-methylcrotonyl-CoA carboxylase beta subunit [EC:6.4.1.4]
K01061	0.0363567	NA	carboxymethylenebutenolidase [EC:3.1.1.45]	K03153	0.0057054	M00895	glycine oxidase [EC:1.4.3.19]
K13926	0.0363315	NA	ribosome-dependent ATPase	K18534	0.00570467	M00112	MPBQ/MSBQ methyltransferase [EC:2.1.1.295]
K11392	0.0363013	NA	16S rRNA (cytosine1407-C5)-methyltransferase [EC:2.1.1.178]	K11923	0.00570103	NA	MerR family transcriptional regulator, copper efflux regulator
K16044	0.0362456	NA	scyllo-inositol 2-dehydrogenase (NADP+) [EC:1.1.1.371]	K19224	0.005701	NA	peptidoglycan DL-endopeptidase LytE [EC:3.4.-.-]
K07243	0.0362325	NA	high-affinity iron transporter	K03774	0.00569607	NA	FKBP-type peptidyl-prolyl cis-trans isomerase SlpA [EC:5.2.1.8]
K10820	0.0361392	NA	galactofuranose transport system ATP-binding protein [EC:7.5.2.9]	K03769	0.00569589	NA	peptidyl-prolyl cis-trans isomerase C [EC:5.2.1.8]
K07180	0.0361044	NA	serine protein kinase	K11735	0.0056766	NA	GABA permease
K02681	0.0360988	NA	prepilin peptidase dependent protein C	K17222	0.00567159	M00595	L-cysteine S-thiosulfotransferase [EC:2.8.5.2]
K14260	0.0360905	NA	alanine-synthesizing transaminase [EC:2.6.1.66 2.6.1.2]	K16919	0.00567038	NA	acetoin utilization transport system permease protein
K02394	0.0360743	NA	flagellar P-ring protein precursor FlgI	K11025	0.0056701	M00574	pertussis toxin subunit 3
K00982	0.0360526	NA	[glutamine synthetase] adenylyltransferase / [glutamine synthetase]-adenylyl-L-tyrosine phosphorylase [EC:2.7.7.42 2.7.7.89]	K02455	0.00566131	NA	general secretion pathway protein F
K11744	0.0360514	NA	AI-2 transport protein TqsA	K11962	0.00566068	NA	urea transport system ATP-binding protein
K08321	0.0360364	NA	3-hydroxy-5-phosphonooxypentane-2,4-dione thiolase [EC:2.3.1.245]	K07401	0.00565382	NA	selenoprotein W-related protein
K07645	0.0360304	NA	two-component system, OmpR family, sensor histidine kinase QseC [EC:2.7.13.3]	K00332	0.00564934	NA	NADH-quinone oxidoreductase subunit C [EC:7.1.1.2]
K03412	0.0359951	NA	two-component system, chemotaxis family, protein-glutamate methylesterase/glutaminase [EC:3.1.1.61 3.5.1.44]	K01575	0.00564864	NA	acetolactate decarboxylase [EC:4.1.1.5]
K03557	0.0359544	NA	Fis family transcriptional regulator, factor for inversion stimulation protein	K12151	0.00564468	NA	multiple stress resistance protein BhsA
K23777	0.0359464	NA	TetR/AcrR family transcriptional regulator, regulator of cefoperazone and chloramphenicol sensitivity	K02460	0.00563772	NA	general secretion pathway protein K
K00556	0.0359157	NA	tRNA (guanosine-2'-O-)-methyltransferase [EC:2.1.1.34]	K09008	0.00563654	NA	NADH dehydrogenase [ubiquinone] 1 alpha subcomplex assembly factor 3
K08970	0.0358692	NA	nickel/cobalt transporter (NicO) family protein	K23464	0.00563201	NA	flavin-dependent trigonelline monooxygenase, oxygenase component [EC:1.14.14.-]
K07259	0.0358659	NA	serine-type D-Ala-D-Ala carboxypeptidase/endopeptidase (penicillin-binding protein 4) [EC:3.4.16.4 3.4.21.-]	K14057	0.00562204	NA	LysR family transcriptional regulator, regulator of abg operon
K12678	0.0358353	NA	autotransporter family porin	K10015	0.00562175	NA	histidine transport system permease protein
K01644	0.035807	NA	citrate lyase subunit beta / citryl-CoA lyase [EC:4.1.3.34]	K10946	0.00561735	M00174	methane/ammonia monooxygenase subunit C
K05835	0.0357799	NA	threonine efflux protein	K09793	0.00561695	NA	uncharacterized protein
K00957	0.0357202	NA	sulfate adenylyltransferase subunit 2 [EC:2.7.7.4]	K00027	0.00560941	NA	malate dehydrogenase (oxaloacetate-decarboxylating) [EC:1.1.1.38]
K02551	0.0357066	M00116	2-succinyl-5-enolpyruvyl-6-hydroxy-3-cyclohexene-1-carboxylate synthase [EC:2.2.1.9]	K21755	0.00560423	NA	LysR family transcriptional regulator, salicylic acid-responsive activator of bsdBCD
K03615	0.0356904	NA	Na+-translocating ferredoxin:NAD+ oxidoreductase subunit C [EC:7.2.1.2]	K02276	0.00560312	NA	cytochrome c oxidase subunit III [EC:7.1.1.9]
K19126	0.035624	NA	CRISPR system Cascade subunit CasE	K21826	0.00560223	NA	AraC family transcriptional regulator, glycine betaine-responsive activator
K03614	0.0356036	NA	Na+-translocating ferredoxin:NAD+ oxidoreductase subunit D [EC:7.2.1.2]	K03700	0.00559996	NA	recombination protein U
K02795	0.0356018	NA	mannose PTS system EIIC component	K03192	0.00559716	NA	urease accessory protein
K05796	0.0355836	NA	electron transport protein HydN	K18996	0.00559476	NA	replication initiation protein RepC
K01438	0.0355793	M00028	acetylornithine deacetylase [EC:3.5.1.16]	K18903	0.0055942	M00698	outer membrane protein, multidrug efflux system
K02744	0.0355515	NA	N-acetylgalactosamine PTS system EIIA component [EC:2.7.1.-]	K01693	0.0055932	NA	imidazoleglycerol-phosphate dehydratase [EC:4.2.1.19]
K14744	0.0355265	NA	prophage endopeptidase [EC:3.4.-.-]	K07157	0.0055927	NA	uncharacterized protein
K03529	0.0355113	NA	chromosome segregation protein	K00315	0.0055915	NA	dimethylglycine dehydrogenase [EC:1.5.8.4]
K02521	0.0355085	NA	LysR family transcriptional regulator, positive regulator for ilvC	K13609	0.00558659	NA	delta1-piperideine-2-carboxylate reductase [EC:1.5.1.21]
K04754	0.0354562	NA	phospholipid-binding lipoprotein MlaA	K23269	0.00558372	NA	phosphoribosylformylglycinamidine synthase subunit PurL [EC:6.3.5.3]
K03801	0.0354424	M00881	lipoyl(octanoyl) transferase [EC:2.3.1.181]	K07046	0.00557744	NA	L-fuconolactonase [EC:3.1.1.-]
K04046	0.0354399	NA	hypothetical chaperone protein	K16043	0.0055657	NA	scyllo-inositol 2-dehydrogenase (NAD+) [EC:1.1.1.370]
K03704	0.0354068	NA	cold shock protein	K18104	0.00556536	M00700	ATP-binding cassette, subfamily B, bacterial AbcA/BmrA [EC:7.6.2.2]
K01734	0.0353664	NA	methylglyoxal synthase [EC:4.2.3.3]	K02274	0.00556125	NA	cytochrome c oxidase subunit I [EC:7.1.1.9]
K10679	0.0353563	NA	nitroreductase / dihydropteridine reductase [EC:1.-.-.- 1.5.1.34]	K17322	0.00556089	NA	glycerol transport system permease protein
K05522	0.0353443	NA	endonuclease VIII [EC:3.2.2.- 4.2.99.18]	K13894	0.00555935	NA	microcin C transport system permease protein
K05818	0.0353363	NA	IclR family transcriptional regulator, mhp operon transcriptional activator	K07577	0.00555845	NA	putative mRNA 3-end processing factor
K21741	0.0353361	NA	reactive chlorine resistance protein C	K04098	0.00555672	NA	hydroxyquinol 1,2-dioxygenase [EC:1.13.11.37]
K01779	0.0353176	NA	aspartate racemase [EC:5.1.1.13]	K06985	0.00555513	NA	aspartyl protease family protein
K08992	0.0353152	NA	lipopolysaccharide assembly protein A	K07395	0.00555485	NA	putative proteasome-type protease
K01584	0.0353102	M00133	arginine decarboxylase [EC:4.1.1.19]	K02597	0.00555385	NA	nitrogen fixation protein NifZ
K00266	0.0352997	NA	glutamate synthase (NADPH) small chain [EC:1.4.1.13]	K02259	0.00555165	NA	cytochrome c oxidase assembly protein subunit 15
K00697	0.035266	NA	trehalose 6-phosphate synthase [EC:2.4.1.15 2.4.1.347]	K09932	0.00554195	NA	uncharacterized protein
K15268	0.0352569	NA	O-acetylserine/cysteine efflux transporter	K00680	0.00553378	NA	uncharacterized N-acetyltransferase [EC:2.3.1.-]
K02462	0.0352208	NA	general secretion pathway protein M	K09983	0.00553023	NA	uncharacterized protein
K02573	0.0352117	NA	ferredoxin-type protein NapG	K07693	0.00552338	NA	two-component system, NarL family, response regulator DesR
K03286	0.0351725	NA	OmpA-OmpF porin, OOP family	K07659	0.00551791	NA	two-component system, OmpR family, phosphate regulon response regulator OmpR
K03594	0.0351595	NA	bacterioferritin [EC:1.16.3.1]	K14162	0.0055172	NA	error-prone DNA polymerase [EC:2.7.7.7]
K05896	0.035141	NA	segregation and condensation protein A	K12253	0.0055169	NA	5-guanidino-2-oxopentanoate decarboxylase [EC:4.1.1.75]
K07709	0.0351372	NA	two-component system, NtrC family, sensor histidine kinase HydH [EC:2.7.13.3]	K01220	0.00551413	NA	6-phospho-beta-galactosidase [EC:3.2.1.85]
K01699	0.0351265	NA	propanediol dehydratase large subunit [EC:4.2.1.28]	K12510	0.00550542	NA	tight adherence protein B
K04031	0.0351246	NA	ethanolamine utilization protein EutS	K16249	0.00550512	M00548	phenol/toluene 2-monooxygenase (NADH) P0/A0
K05591	0.0351119	NA	ATP-dependent RNA helicase DbpA [EC:3.6.4.13]	K00148	0.00550257	NA	glutathione-independent formaldehyde dehydrogenase [EC:1.2.1.46]
K03276	0.0351086	NA	UDP-glucose/galactose:(glucosyl)LPS alpha-1,2-glucosyl/galactosyltransferase [EC:2.4.1.-]	K09945	0.0054991	NA	uncharacterized protein
K02746	0.035086	NA	N-acetylgalactosamine PTS system EIIC component	K23753	0.00549703	NA	AMP-polyphosphate phosphotransferase [EC:2.7.4.33]
K08305	0.0350582	NA	membrane-bound lytic murein transglycosylase B [EC:4.2.2.-]	K09796	0.00549522	NA	periplasmic copper chaperone A
K00244	0.0350325	M00009	fumarate reductase flavoprotein subunit [EC:1.3.5.4]	K00856	0.0054923	NA	adenosine kinase [EC:2.7.1.20]
K00244	0.0350325	M00011	fumarate reductase flavoprotein subunit [EC:1.3.5.4]	K08164	0.00549095	NA	MFS transporter, DHA1 family, putative efflux transporter
K03824	0.0350287	NA	putative acetyltransferase [EC:2.3.1.-]	K02282	0.00548903	NA	pilus assembly protein CpaE
K11932	0.0350283	NA	universal stress protein G	K12511	0.0054881	NA	tight adherence protein C
K07107	0.0349994	NA	acyl-CoA thioester hydrolase [EC:3.1.2.-]	K21420	0.00548051	NA	leucyl-tRNA---protein transferase [EC:2.3.2.29]
K02257	0.0349856	NA	heme o synthase [EC:2.5.1.141]	K11529	0.00547392	NA	glycerate 2-kinase [EC:2.7.1.165]
K06891	0.0349602	NA	ATP-dependent Clp protease adaptor protein ClpS	K19079	0.00547209	M00730	cationic antimicrobial peptide transport system ATP-binding protein
K06190	0.0349508	NA	intracellular septation protein	K02777	0.00546419	NA	sugar PTS system EIIA component [EC:2.7.1.-]
K07214	0.0348954	NA	iron(III)-enterobactin esterase [EC:3.1.1.108]	K23470	0.00546186	NA	4-hydroxyphenylacetate 3-hydroxylase, reductase component [EC:1.5.1.36]
K03554	0.03489	NA	recombination associated protein RdgC	K13482	0.00545804	NA	xanthine dehydrogenase large subunit [EC:1.17.1.4]
K00068	0.0348684	NA	sorbitol-6-phosphate 2-dehydrogenase [EC:1.1.1.140]	K12149	0.0054516	NA	DNA-damage-inducible protein I
K23675	0.0348514	NA	riboflavin transporter	K00595	0.0054437	M00924	precorrin-6Y C5,15-methyltransferase (decarboxylating) [EC:2.1.1.132]
K02454	0.0347934	NA	general secretion pathway protein E [EC:7.4.2.8]	K20998	0.00543389	NA	polysaccharide biosynthesis protein PslE
K06077	0.034786	NA	outer membrane lipoprotein SlyB	K01247	0.00543078	NA	DNA-3-methyladenine glycosylase II [EC:3.2.2.21]
K22042	0.0347746	NA	ArsR family transcriptional regulator, virulence genes transcriptional regulator	K18201	0.00541786	NA	hydroxylysine kinase [EC:2.7.1.81]
K19234	0.0347444	NA	L,D-transpeptidase YnhG	K02675	0.00540962	NA	type IV pilus assembly protein PilY2
K03809	0.0347395	NA	NAD(P)H dehydrogenase (quinone) [EC:1.6.5.2]	K03486	0.00540895	NA	GntR family transcriptional regulator, trehalose operon transcriptional repressor
K00563	0.03471	NA	23S rRNA (guanine745-N1)-methyltransferase [EC:2.1.1.187]	K11102	0.00540494	NA	proton glutamate symport protein
K02460	0.0346899	NA	general secretion pathway protein K	K07232	0.00539828	NA	glutathione-specific gamma-glutamylcyclotransferase [EC:4.3.2.7]
K03152	0.0346873	NA	protein deglycase [EC:3.5.1.124]	K10764	0.00539497	NA	O-succinylhomoserine sulfhydrylase [EC:2.5.1.-]
K11748	0.0346859	NA	glutathione-regulated potassium-efflux system ancillary protein KefG	K01031	0.00539396	NA	3-oxoadipate CoA-transferase, alpha subunit [EC:2.8.3.6]
K24087	0.03468	NA	recombination-promoting nuclease RpnB [EC:3.1.21.-]	K11633	0.00538822	NA	two-component system, OmpR family, sensor histidine kinase YxdK [EC:2.7.13.3]
K08308	0.0345986	NA	membrane-bound lytic murein transglycosylase E [EC:4.2.2.-]	K00114	0.00538529	NA	alcohol dehydrogenase (cytochrome c) [EC:1.1.2.8]
K16370	0.03457	M00001	6-phosphofructokinase 2 [EC:2.7.1.11]	K00117	0.005382	NA	quinoprotein glucose dehydrogenase [EC:1.1.5.2]
K08289	0.0345173	M00048	phosphoribosylglycinamide formyltransferase 2 [EC:2.1.2.2]	K00045	0.00538025	NA	mannitol 2-dehydrogenase [EC:1.1.1.67]
K03071	0.0345141	NA	preprotein translocase subunit SecB	K10003	0.00537571	NA	glutamate/aspartate transport system permease protein
K08154	0.0345136	NA	MFS transporter, DHA1 family, 2-module integral membrane pump EmrD	K11623	0.00537514	NA	two-component system, NarL family, sensor histidine kinase YdfH [EC:2.7.13.3]
K01092	0.0345103	NA	myo-inositol-1(or 4)-monophosphatase [EC:3.1.3.25]	K02673	0.00537	NA	type IV pilus assembly protein PilX
K03684	0.0345001	NA	ribonuclease D [EC:3.1.13.5]	K03518	0.00536924	NA	aerobic carbon-monoxide dehydrogenase small subunit [EC:1.2.5.3]
K03617	0.0344684	NA	Na+-translocating ferredoxin:NAD+ oxidoreductase subunit A	K02530	0.00536784	NA	DeoR family transcriptional regulator, lactose phosphotransferase system repressor
K13014	0.0344653	M00761	undecaprenyl phosphate-alpha-L-ara4FN deformylase [EC:3.5.1.-]	K00480	0.00536509	NA	salicylate hydroxylase [EC:1.14.13.1]
K10543	0.0344258	NA	D-xylose transport system substrate-binding protein	K03090	0.00535251	NA	RNA polymerase sigma-B factor
K06182	0.0343649	NA	23S rRNA pseudouridine2604 synthase [EC:5.4.99.21]	K00161	0.00534853	NA	pyruvate dehydrogenase E1 component alpha subunit [EC:1.2.4.1]
K05794	0.0343606	NA	tellurite resistance protein TerC	K06885	0.00534356	NA	uncharacterized protein
K03616	0.0343582	NA	Na+-translocating ferredoxin:NAD+ oxidoreductase subunit B [EC:7.2.1.2]	K04780	0.0053368	NA	nonribosomal peptide synthetase DhbF
K14055	0.0343383	NA	universal stress protein E	K02793	0.00532881	NA	mannose PTS system EIIA component [EC:2.7.1.191]
K00338	0.0343176	M00144	NADH-quinone oxidoreductase subunit I [EC:7.1.1.2]	K07267	0.00532343	NA	porin
K06895	0.0342604	NA	L-lysine exporter family protein LysE/ArgO	K02250	0.0053212	NA	competence protein ComK
K08994	0.0342483	NA	ion channel-forming bestrophin family protein	K20971	0.00532019	NA	two-component system, sensor histidine kinase LadS
K08307	0.034248	NA	membrane-bound lytic murein transglycosylase D [EC:4.2.2.-]	K12554	0.00531947	NA	alanine adding enzyme [EC:2.3.2.-]
K08169	0.0342392	NA	MFS transporter, DHA2 family, multidrug resistance protein	K07651	0.00531532	NA	two-component system, OmpR family, sensor histidine kinase ResE [EC:2.7.13.3]
K02393	0.0342055	NA	flagellar L-ring protein precursor FlgH	K06151	0.0053138	NA	gluconate 2-dehydrogenase alpha chain [EC:1.1.99.3]
K01079	0.0341576	M00020	phosphoserine phosphatase [EC:3.1.3.3]	K03468	0.00531371	NA	p-hydroxybenzoic acid efflux pump subunit AaeB
K01920	0.0341499	M00118	glutathione synthase [EC:6.3.2.3]	K16841	0.00531316	NA	allantoin racemase [EC:5.1.99.3]
K02472	0.0341389	NA	UDP-N-acetyl-D-mannosaminuronic acid dehydrogenase [EC:1.1.1.336]	K01266	0.00531244	NA	D-aminopeptidase [EC:3.4.11.19]
K00813	0.0341355	NA	aspartate aminotransferase [EC:2.6.1.1]	K07102	0.00531066	NA	N-acetylmuramate 1-kinase [EC:2.7.1.221]
K09823	0.0341289	NA	Fur family transcriptional regulator, zinc uptake regulator	K00938	0.00530762	M00095	phosphomevalonate kinase [EC:2.7.4.2]
K00598	0.0340847	NA	trans-aconitate 2-methyltransferase [EC:2.1.1.144]	K23675	0.00530118	NA	riboflavin transporter
K03673	0.0340824	NA	protein dithiol oxidoreductase (disulfide-forming) [EC:1.8.4.15]	K12082	0.00530071	NA	type IV secretion system protein PtlG
K10672	0.0340776	NA	glycine reductase complex component B subunit gamma [EC:1.21.4.2]	K02798	0.00529382	NA	mannitol PTS system EIIA component [EC:2.7.1.197]
K01991	0.0340732	NA	polysaccharide biosynthesis/export protein	K07222	0.0052924	NA	putative flavoprotein involved in K+ transport
K12151	0.034062	NA	multiple stress resistance protein BhsA	K14188	0.00528504	M00725	D-alanine--poly(phosphoribitol) ligase subunit 2 [EC:6.1.1.13]
K02363	0.0340118	NA	2,3-dihydroxybenzoate-AMP ligase [EC:6.3.2.14 2.7.7.58]	K18991	0.00527841	NA	AraC family transcriptional regulator, activator of mtrCDE
K00573	0.0340094	NA	protein-L-isoaspartate(D-aspartate) O-methyltransferase [EC:2.1.1.77]	K09958	0.00527672	NA	uncharacterized protein
K05340	0.0339954	NA	glucose uptake protein	K17716	0.00527517	NA	UDP-glucose 4-epimerase [EC:5.1.3.2]
K04029	0.0339848	NA	ethanolamine utilization protein EutP	K21481	0.00527442	NA	heme oxygenase (mycobilin-producing) [EC:1.14.99.57]
K09906	0.0339772	NA	elongation factor P hydroxylase [EC:1.14.-.-]	K06325	0.00527369	NA	spore coat protein B
K03634	0.0339669	NA	outer membrane lipoprotein carrier protein	K05946	0.00526926	NA	N-acetylglucosaminyldiphosphoundecaprenol N-acetyl-beta-D-mannosaminyltransferase [EC:2.4.1.187]
K03576	0.0339007	NA	LysR family transcriptional regulator, regulator for metE and metH	K15584	0.00526515	NA	nickel transport system substrate-binding protein
K11107	0.0338885	NA	ferredoxin	K06608	0.00526118	NA	DeoR family transcriptional regulator, myo-inositol catabolism operon repressor
K05811	0.0338729	NA	putative lipoprotein	K07816	0.00525989	NA	putative GTP pyrophosphokinase [EC:2.7.6.5]
K11085	0.0338684	NA	ATP-binding cassette, subfamily B, bacterial MsbA [EC:3.6.3.-]	K21136	0.00524957	NA	membrane fusion protein, multidrug efflux system
K03636	0.0338664	NA	sulfur-carrier protein	K05569	0.00524858	NA	multicomponent Na+:H+ antiporter subunit E
K07300	0.0338634	NA	Ca2+:H+ antiporter	K16238	0.00524176	NA	ethanolamine permease
K03819	0.0338392	NA	putative colanic acid biosynthesis acetyltransferase WcaB [EC:2.3.1.-]	K01182	0.0052344	NA	oligo-1,6-glucosidase [EC:3.2.1.10]
K02815	0.0338345	NA	sorbose PTS system EIID component	K13733	0.00522317	NA	fibronectin-binding protein B
K03182	0.0338124	M00117	4-hydroxy-3-polyprenylbenzoate decarboxylase [EC:4.1.1.98]	K21828	0.00521937	NA	CRP/FNR family transcriptional regulator, arginine deiminase pathway regulator
K21470	0.0337996	NA	L,D-transpeptidase YcbB	K05567	0.00521863	NA	multicomponent Na+:H+ antiporter subunit C
K08722	0.0337694	NA	5'-deoxynucleotidase [EC:3.1.3.89]	K02827	0.00520736	M00416	cytochrome aa3-600 menaquinol oxidase subunit I [EC:7.1.1.5]
K08277	0.0337464	NA	transcriptional activator CaiF	K07231	0.00520301	NA	putative iron-regulated protein
K03288	0.0337295	NA	MFS transporter, MHS family, citrate/tricarballylate:H+ symporter	K16786	0.00519969	NA	energy-coupling factor transport system ATP-binding protein [EC:3.6.3.-]
K08300	0.0337042	NA	ribonuclease E [EC:3.1.26.12]	K23774	0.00519694	NA	DeoR family transcriptional regulator, catabolite repression regulator
K02548	0.0337038	M00116	1,4-dihydroxy-2-naphthoate polyprenyltransferase [EC:2.5.1.74]	K18289	0.005194	NA	itaconate CoA-transferase [EC:2.8.3.- 2.8.3.22]
K11891	0.0336944	NA	type VI secretion system protein ImpL	K09682	0.00519259	NA	MarR family transcriptional regulator, protease production regulatory protein HPr
K09023	0.0336898	M00939	aminoacrylate hydrolase [EC:3.5.1.-]	K22310	0.00518298	NA	L-ornithine Nalpha-acyltransferase [EC:2.3.2.30]
K03272	0.0336493	M00064	D-beta-D-heptose 7-phosphate kinase / D-beta-D-heptose 1-phosphate adenosyltransferase [EC:2.7.1.167 2.7.7.70]	K00404	0.00518216	NA	cytochrome c oxidase cbb3-type subunit I [EC:7.1.1.9]
K13684	0.0336476	NA	putative colanic acid biosynthesis glycosyltransferase [EC:2.4.-.-]	K17317	0.00518189	NA	glucose/mannose transport system permease protein
K00242	0.0335905	M00009	succinate dehydrogenase / fumarate reductase, membrane anchor subunit	K16234	0.00518015	NA	histidine transporter
K00242	0.0335905	M00011	succinate dehydrogenase / fumarate reductase, membrane anchor subunit	K23375	0.00517333	M00875	staphyloferrin B synthase [EC:6.3.2.56]
K00242	0.0335905	M00149	succinate dehydrogenase / fumarate reductase, membrane anchor subunit	K06992	0.00517132	NA	uncharacterized protein
K12264	0.0335865	NA	anaerobic nitric oxide reductase flavorubredoxin	K22074	0.0051673	NA	NFU1 iron-sulfur cluster scaffold homolog, mitochondrial
K01119	0.0335459	NA	2',3'-cyclic-nucleotide 2'-phosphodiesterase / 3'-nucleotidase [EC:3.1.4.16 3.1.3.6]	K21622	0.00516695	NA	D-tagatose 6-phosphate 4-epimerase [EC:5.1.3.40]
K11934	0.0335336	NA	outer membrane protein X	K02461	0.00516579	NA	general secretion pathway protein L
K16711	0.0334884	NA	colanic acid biosynthesis protein WcaM	K23393	0.00516513	NA	lipid II isoglutaminyl synthase (glutamine-hydrolysing) [EC:6.3.5.13]
K11735	0.0334711	NA	GABA permease	K18901	0.00516427	M00698	membrane fusion protein, multidrug efflux system
K07638	0.0334337	NA	two-component system, OmpR family, osmolarity sensor histidine kinase EnvZ [EC:2.7.13.3]	K03795	0.00516285	M00924	sirohydrochlorin cobaltochelatase [EC:4.99.1.3]
K23242	0.0334171	NA	manganese efflux pump family protein	K01101	0.00516198	NA	4-nitrophenyl phosphatase [EC:3.1.3.41]
K07277	0.0334061	NA	outer membrane protein insertion porin family	K14584	0.00515496	NA	2-hydroxychromene-2-carboxylate isomerase [EC:5.99.1.4]
K07789	0.0333887	NA	multidrug efflux pump	K05603	0.00514993	NA	formimidoylglutamate deiminase [EC:3.5.3.13]
K09790	0.033385	NA	uncharacterized protein	K14160	0.00514629	NA	protein ImuA
K01194	0.0333731	NA	alpha,alpha-trehalase [EC:3.2.1.28]	K00612	0.00514394	NA	carbamoyltransferase [EC:2.1.3.-]
K16509	0.0333714	NA	regulatory protein spx	K00413	0.00514292	NA	ubiquinol-cytochrome c reductase cytochrome c1 subunit
K01284	0.0333424	NA	peptidyl-dipeptidase Dcp [EC:3.4.15.5]	K00481	0.00514124	NA	p-hydroxybenzoate 3-monooxygenase [EC:1.14.13.2]
K01753	0.0333305	NA	D-serine dehydratase [EC:4.3.1.18]	K22136	0.00513886	NA	bacillithiol synthase
K09800	0.0333289	NA	translocation and assembly module TamB	K10228	0.00513882	NA	sorbitol/mannitol transport system permease protein
K02041	0.0333173	NA	phosphonate transport system ATP-binding protein [EC:7.3.2.2]	K22476	0.00513599	NA	N-acetylglutamate synthase [EC:2.3.1.1]
K07707	0.0333155	NA	two-component system, LytTR family, response regulator AgrA	K21285	0.00513591	NA	teichoic acid glycerol-phosphate primase [EC:2.7.8.44]
K11935	0.0332792	NA	biofilm PGA synthesis protein PgaA	K11077	0.00513208	NA	mannopine transport system substrate-binding protein
K01610	0.0332708	M00003	phosphoenolpyruvate carboxykinase (ATP) [EC:4.1.1.49]	K01958	0.00513044	NA	pyruvate carboxylase [EC:6.4.1.1]
K10539	0.0332573	NA	L-arabinose transport system ATP-binding protein [EC:7.5.2.12]	K07705	0.00512354	NA	two-component system, LytTR family, response regulator LytT
K03743	0.0332182	NA	nicotinamide-nucleotide amidase [EC:3.5.1.42]	K01458	0.00512087	NA	N-formylglutamate deformylase [EC:3.5.1.68]
K07258	0.0332081	NA	serine-type D-Ala-D-Ala carboxypeptidase (penicillin-binding protein 5/6) [EC:3.4.16.4]	K01166	0.00511879	NA	ribonuclease T2 [EC:4.6.1.19]
K03895	0.0332054	NA	aerobactin synthase [EC:6.3.2.39]	K07035	0.00510501	NA	uncharacterized protein
K04026	0.0332035	NA	ethanolamine utilization protein EutL	K11079	0.00509632	NA	mannopine transport system permease protein
K00311	0.0331615	NA	electron-transferring-flavoprotein dehydrogenase [EC:1.5.5.1]	K04940	0.00509592	NA	opine dehydrogenase [EC:1.5.1.28]
K11751	0.0331503	NA	5'-nucleotidase / UDP-sugar diphosphatase [EC:3.1.3.5 3.6.1.45]	K18672	0.0050927	NA	diadenylate cyclase [EC:2.7.7.85]
K09936	0.0331419	NA	bacterial/archaeal transporter family-2 protein	K21086	0.00509251	NA	c-di-GMP phosphodiesterase [EC:3.1.4.52]
K07232	0.0331341	NA	glutathione-specific gamma-glutamylcyclotransferase [EC:4.3.2.7]	K08166	0.00508997	NA	MFS transporter, DHA2 family, methylenomycin A resistance protein
K21645	0.03313	NA	LysR family transcriptional regulator, hypochlorite-specific transcription factor HypT	K01039	0.00508759	NA	glutaconate CoA-transferase, subunit A [EC:2.8.3.12]
K05779	0.0330976	NA	putative thiamine transport system ATP-binding protein	K21196	0.00507816	NA	2-amino-1-hydroxyethylphosphonate dioxygenase (glycine-forming) [EC:1.13.11.78]
K07120	0.033038	NA	uncharacterized protein	K20257	0.00507653	NA	2-aminobenzoylacetyl-CoA thioesterase [EC:3.1.2.32]
K09768	0.0330049	NA	uncharacterized protein	K08086	0.0050741	NA	pilus assembly protein FimV
K00823	0.0329789	M00027	4-aminobutyrate aminotransferase [EC:2.6.1.19]	K15976	0.00506778	NA	putative NAD(P)H nitroreductase [EC:1.-.-.-]
K01270	0.0329567	NA	dipeptidase D [EC:3.4.13.-]	K06198	0.00505981	NA	competence protein CoiA
K02427	0.0329537	NA	23S rRNA (uridine2552-2'-O)-methyltransferase [EC:2.1.1.166]	K11475	0.00505779	NA	GntR family transcriptional regulator, vanillate catabolism transcriptional regulator
K07490	0.0329433	NA	ferrous iron transport protein C	K16869	0.00505558	M00883	octanoyl-[GcvH]:protein N-octanoyltransferase [EC:2.3.1.204]
K08322	0.0329112	NA	L-gulonate 5-dehydrogenase [EC:1.1.1.380]	K11532	0.00505525	M00165	fructose-1,6-bisphosphatase II / sedoheptulose-1,7-bisphosphatase [EC:3.1.3.11 3.1.3.37]
K01716	0.0329094	M00083	3-hydroxyacyl-[acyl-carrier protein] dehydratase / trans-2-decenoyl-[acyl-carrier protein] isomerase [EC:4.2.1.59 5.3.3.14]	K11532	0.00505525	M00167	fructose-1,6-bisphosphatase II / sedoheptulose-1,7-bisphosphatase [EC:3.1.3.11 3.1.3.37]
K06132	0.032882	NA	cardiolipin synthase C [EC:2.7.8.-]	K17227	0.0050552	M00595	sulfur-oxidizing protein SoxZ
K09159	0.0328257	NA	antitoxin CptB	K14161	0.00505191	NA	protein ImuB
K14392	0.0328211	NA	sodium/pantothenate symporter	K23257	0.00504651	NA	methylglyoxal/glyoxal reductase [EC:1.1.1.283 1.1.1.-]
K00426	0.0328159	M00153	cytochrome bd ubiquinol oxidase subunit II [EC:7.1.1.7]	K21829	0.00504105	NA	D-arginine utilization repressor
K03818	0.032759	NA	putative colanic acid biosynthesis acetyltransferase WcaF [EC:2.3.1.-]	K03740	0.00503248	M00725	D-alanine transfer protein
K00389	0.032759	NA	putative membrane protein	K06295	0.00502359	NA	spore germination protein KA
K04068	0.0327513	NA	anaerobic ribonucleoside-triphosphate reductase activating protein [EC:1.97.1.4]	K02458	0.00501594	NA	general secretion pathway protein I
K03975	0.0327445	NA	membrane-associated protein	K06328	0.00501039	NA	spore coat protein E
K10763	0.0327082	NA	DnaA-homolog protein	K06962	0.00500172	NA	uncharacterized protein
K01669	0.0326998	NA	deoxyribodipyrimidine photo-lyase [EC:4.1.99.3]	K19431	0.00500068	NA	pyruvyl transferase EpsO [EC:2.-.-.-]
K07459	0.0326942	NA	putative ATP-dependent endonuclease of the OLD family	K12536	0.00500056	NA	ATP-binding cassette, subfamily C, bacterial exporter for protease/lipase
K06861	0.0326941	NA	lipopolysaccharide export system ATP-binding protein [EC:3.6.3.-]	K24041	0.00499116	NA	penicillin V amidase [EC:3.5.1.11]
K15555	0.0326713	NA	sulfonate transport system ATP-binding protein [EC:3.6.3.-]	K15665	0.00498889	NA	fengycin family lipopeptide synthetase B
K03535	0.0326611	NA	MFS transporter, ACS family, glucarate transporter	K21686	0.00498845	NA	XRE family transcriptional regulator, fatty acid utilization regulator
K09969	0.0326111	NA	general L-amino acid transport system substrate-binding protein	K21133	0.00498588	NA	multidrug efflux pump
K00795	0.032604	M00364	farnesyl diphosphate synthase [EC:2.5.1.1 2.5.1.10]	K01707	0.00498417	NA	5-dehydro-4-deoxyglucarate dehydratase [EC:4.2.1.41]
K07667	0.0325928	NA	two-component system, OmpR family, KDP operon response regulator KdpE	K07697	0.00498316	NA	two-component system, sporulation sensor kinase B [EC:2.7.13.3]
K09897	0.0325576	NA	uncharacterized protein	K15011	0.00497965	NA	two-component system, sensor histidine kinase RegB [EC:2.7.13.3]
K00848	0.0325355	NA	rhamnulokinase [EC:2.7.1.5]	K12537	0.00497938	NA	membrane fusion protein, protease secretion system
K01585	0.0325316	M00133	arginine decarboxylase [EC:4.1.1.19]	K04719	0.00497726	NA	5,6-dimethylbenzimidazole synthase [EC:1.13.11.79]
K05819	0.0325313	NA	MFS transporter, AAHS family, 3-hydroxyphenylpropionic acid transporter	K14202	0.00497093	NA	chemotaxis inhibitory protein
K06346	0.0325304	NA	spoIIIJ-associated protein	K02275	0.00497089	NA	cytochrome c oxidase subunit II [EC:7.1.1.9]
K07150	0.0324953	NA	uncharacterized protein	K03451	0.00496892	NA	betaine/carnitine transporter, BCCT family
K00851	0.0324876	NA	gluconokinase [EC:2.7.1.12]	K17734	0.00496371	NA	serine protease AprX [EC:3.4.21.-]
K02825	0.0324602	NA	pyrimidine operon attenuation protein / uracil phosphoribosyltransferase [EC:2.4.2.9]	K07403	0.00496306	NA	membrane-bound serine protease (ClpP class)
K16139	0.032452	NA	glucuronide carrier protein	K24138	0.00496209	NA	glutaredoxin/glutathione-dependent peroxiredoxin [EC:1.11.1.25 1.11.1.27]
K03841	0.0324499	M00003	fructose-1,6-bisphosphatase I [EC:3.1.3.11]	K09826	0.00496113	NA	Fur family transcriptional regulator, iron response regulator
K08984	0.0324305	NA	putative membrane protein	K06923	0.00496077	NA	uncharacterized protein
K04744	0.0324141	NA	LPS-assembly protein	K03739	0.00494997	M00725	membrane protein involved in D-alanine export
K24217	0.0324126	NA	L-amino acid N-acyltransferase [EC:2.3.1.-]	K16511	0.00494216	NA	adapter protein MecA 1/2
K00865	0.0324101	NA	glycerate 2-kinase [EC:2.7.1.165]	K23541	0.00494053	NA	Ca2+/H+ antiporter, TMEM165/GDT1 family
K09612	0.0323504	NA	alkaline phosphatase isozyme conversion protein [EC:3.4.11.-]	K04041	0.00493504	NA	fructose-1,6-bisphosphatase III [EC:3.1.3.11]
K03297	0.0323497	NA	small multidrug resistance pump	K08681	0.004924	NA	5'-phosphate synthase pdxT subunit [EC:4.3.3.6]
K06188	0.0323311	NA	aquaporin Z	K17225	0.00491847	M00595	sulfane dehydrogenase subunit SoxC
K08368	0.0322981	NA	MFS transporter, putative metabolite transport protein	K22843	0.00490554	NA	ETFB lysine methyltransferase [EC:2.1.1.-]
K05916	0.0322867	NA	nitric oxide dioxygenase [EC:1.14.12.17]	K15012	0.0049047	NA	two-component system, response regulator RegA
K13735	0.0322666	NA	adhesin/invasin	K01857	0.00490242	NA	3-carboxy-cis,cis-muconate cycloisomerase [EC:5.5.1.2]
K01627	0.0322641	M00063	2-dehydro-3-deoxyphosphooctonate aldolase (KDO 8-P synthase) [EC:2.5.1.55]	K00302	0.00489468	NA	sarcosine oxidase, subunit alpha [EC:1.5.3.1]
K19124	0.0322598	NA	CRISPR system Cascade subunit CasC	K02453	0.00489043	NA	general secretion pathway protein D
K04333	0.0322274	NA	LuxR family transcriptional regulator, csgAB operon transcriptional regulatory protein	K01005	0.0048897	NA	polyisoprenyl-teichoic acid--peptidoglycan teichoic acid transferase [EC:2.7.8.-]
K19354	0.0322087	NA	heptose III glucuronosyltransferase [EC:2.4.1.-]	K01802	0.00488481	NA	peptidylprolyl isomerase [EC:5.2.1.8]
K12527	0.0322035	NA	putative selenate reductase [EC:1.97.1.9]	K24158	0.00487923	NA	thioredoxin-dependent peroxiredoxin [EC:1.11.1.24]
K19304	0.0322032	NA	murein DD-endopeptidase [EC:3.4.24.-]	K00253	0.00487872	M00036	isovaleryl-CoA dehydrogenase [EC:1.3.8.4]
K05595	0.0321849	NA	multiple antibiotic resistance protein	K07742	0.00487534	NA	uncharacterized protein
K02823	0.0321604	NA	dihydroorotate dehydrogenase electron transfer subunit	K03712	0.00487383	NA	MarR family transcriptional regulator, multiple antibiotic resistance protein MarR
K00381	0.0321536	NA	sulfite reductase (NADPH) hemoprotein beta-component [EC:1.8.1.2]	K05570	0.00487296	NA	multicomponent Na+:H+ antiporter subunit F
K23239	0.0321284	NA	FrmR/RcnR family transcriptional regulator, repressor of frmRAB operon	K19068	0.00487185	NA	UDP-2-acetamido-2,6-beta-L-arabino-hexul-4-ose reductase [EC:1.1.1.367]
K12945	0.0321157	NA	GDP-mannose pyrophosphatase NudK [EC:3.6.1.-]	K18098	0.00486682	NA	LuxR family transcriptional regulator, quorum-sensing system regulator BjaR1
K11073	0.0321121	NA	putrescine transport system substrate-binding protein	K18336	0.00486248	NA	2,4-didehydro-3-deoxy-L-rhamnonate hydrolase [EC:3.7.1.26]
K07400	0.0321096	NA	Fe/S biogenesis protein NfuA	K00643	0.0048613	NA	5-aminolevulinate synthase [EC:2.3.1.37]
K10914	0.0320771	NA	CRP/FNR family transcriptional regulator, cyclic AMP receptor protein	K01505	0.00486112	NA	1-aminocyclopropane-1-carboxylate deaminase [EC:3.5.99.7]
K09801	0.0320636	NA	uncharacterized protein	K07030	0.00486047	NA	uncharacterized protein
K00048	0.0320533	NA	lactaldehyde reductase [EC:1.1.1.77]	K03706	0.00485848	NA	transcriptional pleiotropic repressor
K02841	0.0320387	NA	heptosyltransferase I [EC:2.4.-.-]	K00294	0.00485676	NA	1-pyrroline-5-carboxylate dehydrogenase [EC:1.2.1.88]
K09017	0.0320216	NA	TetR/AcrR family transcriptional regulator	K17735	0.00485505	NA	carnitine 3-dehydrogenase [EC:1.1.1.108]
K03445	0.0320194	NA	MFS transporter, DHA1 family, purine ribonucleoside efflux pump	K00819	0.00485407	NA	ornithine--oxo-acid transaminase [EC:2.6.1.13]
K21029	0.0319808	NA	molybdopterin-synthase adenylyltransferase [EC:2.7.7.80]	K02243	0.00484316	NA	competence protein ComGA
K09808	0.0319778	NA	lipoprotein-releasing system permease protein	K22299	0.00484067	NA	HTH-type transcriptional regulator, competence development regulator
K10556	0.0319672	NA	AI-2 transport system permease protein	K06986	0.00483678	NA	uncharacterized protein
K04072	0.0319635	NA	acetaldehyde dehydrogenase / alcohol dehydrogenase [EC:1.2.1.10 1.1.1.1]	K03483	0.0048302	NA	mannitol operon transcriptional antiterminator
K00757	0.0319504	NA	uridine phosphorylase [EC:2.4.2.3]	K07707	0.00482837	NA	two-component system, LytTR family, response regulator AgrA
K00275	0.0319125	NA	pyridoxamine 5'-phosphate oxidase [EC:1.4.3.5]	K22303	0.00482212	NA	alpha-ketoglutarate-dependent sulfate ester dioxygenase [EC:1.14.11.-]
K01087	0.0318943	NA	trehalose 6-phosphate phosphatase [EC:3.1.3.12]	K19424	0.00482011	NA	glycosyltransferase EpsF [EC:2.4.-.-]
K10708	0.0318644	NA	fructoselysine 6-phosphate deglycase [EC:3.5.-.-]	K00448	0.00481595	NA	protocatechuate 3,4-dioxygenase, alpha subunit [EC:1.13.11.3]
K01537	0.0318421	NA	P-type Ca2+ transporter type 2C [EC:7.2.2.10]	K00282	0.00481348	NA	glycine dehydrogenase subunit 1 [EC:1.4.4.2]
K04335	0.0318355	NA	minor curlin subunit	K10002	0.00480811	NA	glutamate/aspartate transport system permease protein
K19221	0.0318351	M00122	cob(I)alamin adenosyltransferase [EC:2.5.1.17]	K05913	0.00480362	NA	2,4'-dihydroxyacetophenone dioxygenase [EC:1.13.11.41]
K09019	0.0318131	M00939	3-hydroxypropanoate dehydrogenase [EC:1.1.1.-]	K14200	0.00479928	NA	fibrinogen-binding protein
K00882	0.0318126	NA	1-phosphofructokinase [EC:2.7.1.56]	K05562	0.00479903	NA	multicomponent K+:H+ antiporter subunit E
K02046	0.0317841	NA	sulfate/thiosulfate transport system permease protein	K19246	0.00479333	NA	arachidonate 15-lipoxygenase [EC:1.13.11.33]
K03669	0.031779	NA	membrane glycosyltransferase [EC:2.4.1.-]	K18456	0.00479105	NA	8-oxoguanine deaminase [EC:3.5.4.32]
K08162	0.0317718	NA	MFS transporter, DHA1 family, multidrug resistance protein	K21478	0.00477391	NA	poly-beta-1,6-N-acetyl-D-glucosamine N-deacetylase [EC:3.5.1.-]
K13498	0.0317393	M00023	indole-3-glycerol phosphate synthase / phosphoribosylanthranilate isomerase [EC:4.1.1.48 5.3.1.24]	K06139	0.00477385	NA	PqqA peptide cyclase [EC:1.21.98.4]
K02065	0.0317386	NA	phospholipid/cholesterol/gamma-HCH transport system ATP-binding protein	K13766	0.00476826	M00036	methylglutaconyl-CoA hydratase [EC:4.2.1.18]
K22501	0.0317351	M00153	cytochrome bd-II ubiquinol oxidase subunit AppX [EC:7.1.1.7]	K00491	0.00476647	NA	nitric-oxide synthase, bacterial [EC:1.14.14.47]
K12339	0.0317021	NA	S-sulfo-L-cysteine synthase (O-acetyl-L-serine-dependent) [EC:2.5.1.144]	K00499	0.00475502	NA	choline monooxygenase [EC:1.14.15.7]
K05782	0.0317017	NA	benzoate membrane transport protein	K01555	0.00475444	M00044	fumarylacetoacetase [EC:3.7.1.2]
K00216	0.031691	NA	2,3-dihydro-2,3-dihydroxybenzoate dehydrogenase [EC:1.3.1.28]	K02254	0.00475063	NA	competence protein ComZ
K02068	0.0316684	NA	putative ABC transport system ATP-binding protein	K19081	0.00474699	NA	two-component system, OmpR family, sensor histidine kinase BraS/BceS [EC:2.7.13.3]
K10540	0.031645	NA	methyl-galactoside transport system substrate-binding protein	K16871	0.00473352	NA	4-aminobutyrate---pyruvate transaminase [EC:2.6.1.96]
K07649	0.0316026	NA	two-component system, OmpR family, sensor histidine kinase TctE [EC:2.7.13.3]	K15468	0.0047326	NA	cytochrome P450 PksS
K05807	0.0315825	NA	outer membrane protein assembly factor BamD	K18692	0.00473047	NA	ATP-dependent RNA helicase CshB [EC:3.6.4.13]
K07127	0.0315721	NA	5-hydroxyisourate hydrolase [EC:3.5.2.17]	K22301	0.00472961	NA	HTH-type transcriptional regulator, osmoprotectant uptake regulator
K09923	0.0315514	NA	uncharacterized protein	K00231	0.00472856	M00926	protoporphyrinogen/coproporphyrinogen III oxidase [EC:1.3.3.4 1.3.3.15]
K03721	0.0315246	NA	transcriptional regulator of aroF, aroG, tyrA and aromatic amino acid transport	K07706	0.00472447	NA	two-component system, LytTR family, sensor histidine kinase AgrC [EC:2.7.13.3]
K01813	0.0315185	NA	L-rhamnose isomerase [EC:5.3.1.14]	K19954	0.00472036	NA	alcohol dehydrogenase [EC:1.1.1.-]
K07688	0.0315086	NA	two-component system, NarL family, response regulator, fimbrial Z protein, FimZ	K13929	0.00471772	NA	malonate decarboxylase alpha subunit [EC:2.3.1.187]
K02413	0.0314763	NA	flagellar FliJ protein	K00016	0.00470848	NA	L-lactate dehydrogenase [EC:1.1.1.27]
K13895	0.0314566	NA	microcin C transport system permease protein	K09795	0.00470084	NA	uncharacterized protein
K03807	0.031453	NA	AmpE protein	K06607	0.0046967	NA	myo-inositol catabolism protein IolS [EC:1.1.1.-]
K06518	0.0314234	NA	holin-like protein	K16785	0.00469437	NA	energy-coupling factor transport system permease protein
K01804	0.0314145	NA	L-arabinose isomerase [EC:5.3.1.4]	K18208	0.00469249	NA	renalase [EC:1.6.3.5]
K03649	0.031404	NA	double-stranded uracil-DNA glycosylase [EC:3.2.2.28]	K01960	0.00468675	NA	pyruvate carboxylase subunit B [EC:6.4.1.1]
K01008	0.0314028	NA	selenide, water dikinase [EC:2.7.9.3]	K07028	0.00468605	NA	uncharacterized protein
K03931	0.031398	NA	putative isomerase	K15986	0.00468523	NA	manganese-dependent inorganic pyrophosphatase [EC:3.6.1.1]
K03455	0.0313831	NA	monovalent cation:H+ antiporter-2, CPA2 family	K05561	0.00467978	NA	multicomponent K+:H+ antiporter subunit D
K03568	0.0313747	NA	TldD protein	K19426	0.00467846	NA	pyruvyl transferase EpsI [EC:2.-.-.-]
K01682	0.0313378	M00009	aconitate hydratase 2 / 2-methylisocitrate dehydratase [EC:4.2.1.3 4.2.1.99]	K10548	0.00467823	NA	putative multiple sugar transport system ATP-binding protein [EC:7.5.2.-]
K01682	0.0313378	M00010	aconitate hydratase 2 / 2-methylisocitrate dehydratase [EC:4.2.1.3 4.2.1.99]	K21134	0.0046768	NA	multidrug efflux pump
K01682	0.0313378	M00012	aconitate hydratase 2 / 2-methylisocitrate dehydratase [EC:4.2.1.3 4.2.1.99]	K07586	0.0046754	NA	uncharacterized protein
K01089	0.0313285	M00026	imidazoleglycerol-phosphate dehydratase / histidinol-phosphatase [EC:4.2.1.19 3.1.3.15]	K03851	0.00467218	NA	taurine-pyruvate aminotransferase [EC:2.6.1.77]
K22444	0.0313279	NA	carnitine monooxygenase subunit [EC:1.14.13.239]	K13052	0.00466684	NA	cell division protein DivIC
K06204	0.0313262	NA	DnaK suppressor protein	K04094	0.00466628	NA	methylenetetrahydrofolate--tRNA-(uracil-5-)-methyltransferase [EC:2.1.1.74]
K07279	0.0313231	NA	autotransporter family porin	K00449	0.00466412	NA	protocatechuate 3,4-dioxygenase, beta subunit [EC:1.13.11.3]
K02459	0.0312707	NA	general secretion pathway protein J	K17243	0.00466251	NA	alpha-1,4-digalacturonate transport system permease protein
K07784	0.0312671	NA	MFS transporter, OPA family, hexose phosphate transport protein UhpT	K09777	0.00466167	NA	uncharacterized protein
K14057	0.0312607	NA	LysR family transcriptional regulator, regulator of abg operon	K08981	0.00466093	NA	putative membrane protein
K09975	0.0312512	NA	uncharacterized protein	K13490	0.00465959	NA	two-component system, chemotaxis family, sensor histidine kinase and response regulator WspE
K01816	0.031235	NA	hydroxypyruvate isomerase [EC:5.3.1.22]	K22474	0.00465677	NA	alcohol dehydrogenase (quinone), cytochrome c subunit [EC:1.1.5.5]
K02439	0.0312012	NA	thiosulfate sulfurtransferase [EC:2.8.1.1]	K21165	0.00464984	M00824	enediyne biosynthesis protein E8
K03833	0.0311226	NA	selenocysteine-specific elongation factor	K09949	0.00464801	M00866	uncharacterized protein
K00299	0.0310934	NA	FMN reductase [EC:1.5.1.38]	K04074	0.00464318	NA	cell division initiation protein
K05982	0.0310808	NA	deoxyribonuclease V [EC:3.1.21.7]	K13642	0.00464126	NA	CRP/FNR family transcriptional regulator, transcriptional activator FtrB
K07393	0.0310603	NA	glutathionyl-hydroquinone reductase [EC:1.8.5.7]	K01545	0.00463994	NA	potassium-transporting ATPase KdpF subunit
K06962	0.0310514	NA	uncharacterized protein	K17226	0.00463497	M00595	sulfur-oxidizing protein SoxY
K04023	0.0310429	NA	ethanolamine transporter	K05973	0.00463061	NA	poly(3-hydroxybutyrate) depolymerase [EC:3.1.1.75]
K00880	0.0310207	NA	L-xylulokinase [EC:2.7.1.53]	K07105	0.00462637	NA	uncharacterized protein
K06165	0.030972	NA	alpha-D-ribose 1-methylphosphonate 5-triphosphate synthase subunit PhnH [EC:2.7.8.37]	K20420	0.00462503	NA	2-hydroxy-5-methyl-1-naphthoate 7-hydroxylase [EC:1.14.15.31]
K06445	0.0309582	NA	acyl-CoA dehydrogenase [EC:1.3.99.-]	K08678	0.00461193	NA	UDP-glucuronate decarboxylase [EC:4.1.1.35]
K08680	0.0309364	M00116	2-succinyl-6-hydroxy-2,4-cyclohexadiene-1-carboxylate synthase [EC:4.2.99.20]	K19732	0.00460335	NA	LuxR family transcriptional regulator, activator of conjugal transfer of Ti plasmids
K01626	0.0309277	M00022	3-deoxy-7-phosphoheptulonate synthase [EC:2.5.1.54]	K09788	0.00459801	NA	2-methylaconitate isomerase [EC:5.3.3.-]
K15836	0.030926	NA	formate hydrogenlyase transcriptional activator	K18306	0.0045959	NA	membrane fusion protein, multidrug efflux system
K05589	0.0308987	NA	cell division protein FtsB	K02639	0.00459511	NA	ferredoxin
K01407	0.0308465	NA	protease III [EC:3.4.24.55]	K09940	0.00459019	NA	uncharacterized protein
K01095	0.0308242	NA	phosphatidylglycerophosphatase A [EC:3.1.3.27]	K17316	0.00458996	NA	glucose/mannose transport system permease protein
K07679	0.0308077	NA	two-component system, NarL family, sensor histidine kinase EvgS [EC:2.7.13.3]	K22067	0.00458913	NA	two-component system, oxyanion-binding sensor
K11927	0.030782	NA	ATP-dependent RNA helicase RhlE [EC:3.6.4.13]	K23246	0.00458751	NA	D-apionate lactonase [EC:3.1.1.-]
K05539	0.0307816	NA	tRNA-dihydrouridine synthase A [EC:1.-.-.-]	K00146	0.00457428	NA	phenylacetaldehyde dehydrogenase [EC:1.2.1.39]
K02063	0.0307791	NA	thiamine transport system permease protein	K23447	0.00456017	M00876	staphyloferrin A synthase [EC:6.3.2.57]
K00090	0.0307716	NA	glyoxylate/hydroxypyruvate/2-ketogluconate reductase [EC:1.1.1.79 1.1.1.81 1.1.1.215]	K21697	0.00455575	NA	LuxR family transcriptional regulator, quorum-sensing system regulator VjbR
K16868	0.0307554	NA	tellurite methyltransferase [EC:2.1.1.265]	K23993	0.00454938	NA	multiphosphoryl transfer protein [EC:2.7.3.9 2.7.1.202]
K03072	0.0307065	NA	preprotein translocase subunit SecD	K21825	0.00454882	NA	AraC family transcriptional regulator, L-arginine-responsive activator
K14588	0.0306984	NA	blue copper oxidase	K06347	0.00454822	NA	kinase-associated protein B
K06041	0.0306858	M00063	arabinose-5-phosphate isomerase [EC:5.3.1.13]	K15981	0.00454537	NA	cholest-4-en-3-one 26-monooxygenase [EC:1.14.15.29]
K11893	0.03064	NA	type VI secretion system protein ImpJ	K05560	0.00453725	NA	multicomponent K+:H+ antiporter subunit C
K02507	0.0306146	NA	protein transport protein HofQ	K03436	0.00453608	NA	DeoR family transcriptional regulator, fructose operon transcriptional repressor
K07810	0.0306085	NA	Cu(I)/Ag(I) efflux system periplasmic protein CusF	K06381	0.00452735	NA	stage II sporulation protein D
K08191	0.0305987	NA	MFS transporter, ACS family, hexuronate transporter	K06376	0.00452452	NA	stage 0 sporulation regulatory protein
K09158	0.0305986	NA	uncharacterized protein	K15789	0.00452208	NA	threonine 3-dehydrogenase [EC:1.1.1.103]
K19336	0.0305793	NA	cyclic-di-GMP-binding biofilm dispersal mediator protein	K01523	0.00452061	NA	phosphoribosyl-ATP pyrophosphohydrolase [EC:3.6.1.31]
K16052	0.0305721	NA	MscS family membrane protein	K00917	0.00451526	NA	tagatose 6-phosphate kinase [EC:2.7.1.144]
K08997	0.0305505	NA	serine/tyrosine/threonine adenylyltransferase [EC:2.7.7.-]	K19345	0.00450314	NA	protein NirF
K06415	0.0305035	NA	stage V sporulation protein R	K01144	0.00450267	NA	exodeoxyribonuclease V [EC:3.1.11.5]
K00651	0.0305007	M00017	homoserine O-succinyltransferase/O-acetyltransferase [EC:2.3.1.46 2.3.1.31]	K01729	0.00450251	NA	poly(beta-D-mannuronate) lyase [EC:4.2.2.3]
K03186	0.0304959	M00117	flavin prenyltransferase [EC:2.5.1.129]	K08642	0.00449662	NA	LasA protease [EC:3.4.24.-]
K11145	0.0304702	NA	ribonuclease III family protein [EC:3.1.26.-]	K01796	0.00449022	NA	alpha-methylacyl-CoA racemase [EC:5.1.99.4]
K00009	0.0304526	NA	mannitol-1-phosphate 5-dehydrogenase [EC:1.1.1.17]	K00304	0.00448814	NA	sarcosine oxidase, subunit delta [EC:1.5.3.1]
K06917	0.03045	NA	tRNA 2-selenouridine synthase [EC:2.9.1.3]	K06136	0.00448427	NA	pyrroloquinoline quinone biosynthesis protein B
K00364	0.0304388	NA	GMP reductase [EC:1.7.1.7]	K23462	0.00448264	NA	flavin-dependent trigonelline monooxygenase, reductase component [EC:1.5.1.36]
K09901	0.0304282	NA	uncharacterized protein	K01477	0.00448223	M00546	allantoicase [EC:3.5.3.4]
K05964	0.0304223	NA	holo-ACP synthase [EC:2.7.7.61]	K02499	0.00448193	NA	tetrapyrrole methylase family protein / MazG family protein
K11102	0.0304121	NA	proton glutamate symport protein	K01032	0.00447617	NA	3-oxoadipate CoA-transferase, beta subunit [EC:2.8.3.6]
K09767	0.0304068	NA	cyclic-di-GMP-binding protein	K06893	0.00447408	NA	uncharacterized protein
K11105	0.0303679	NA	potassium/hydrogen antiporter	K10547	0.0044723	NA	putative multiple sugar transport system permease protein
K03611	0.0303672	NA	protein dithiol:quinone oxidoreductase [EC:1.8.5.9]	K06353	0.00446921	NA	phosphatase RapC regulator
K15984	0.0303443	NA	16S rRNA (guanine1516-N2)-methyltransferase [EC:2.1.1.242]	K06318	0.00446716	NA	forespore regulator of the sigma-K checkpoint
K12142	0.0303429	NA	hydrogenase-4 component G [EC:1.-.-.-]	K12506	0.00446293	NA	2-C-methyl-D-erythritol 4-phosphate cytidylyltransferase / 2-C-methyl-D-erythritol 2,4-cyclodiphosphate synthase [EC:2.7.7.60 4.6.1.12]
K00425	0.0303292	M00153	cytochrome bd ubiquinol oxidase subunit I [EC:7.1.1.7]	K19303	0.00446017	NA	murein DD-endopeptidase [EC:3.4.-.-]
K00163	0.0303159	M00307	pyruvate dehydrogenase E1 component [EC:1.2.4.1]	K07457	0.00445607	NA	endonuclease III related protein
K00219	0.0303005	NA	2,4-dienoyl-CoA reductase (NADPH2) [EC:1.3.1.34]	K08965	0.00445572	NA	2,3-diketo-5-methylthiopentyl-1-phosphate enolase [EC:5.3.2.5]
K16786	0.0302555	NA	energy-coupling factor transport system ATP-binding protein [EC:3.6.3.-]	K12538	0.00445552	NA	outer membrane protein, protease secretion system
K07091	0.0302523	NA	lipopolysaccharide export system permease protein	K22106	0.00444781	NA	TetR/AcrR family transcriptional regulator, repressor of fatR-cypB operon
K05813	0.0302473	NA	sn-glycerol 3-phosphate transport system substrate-binding protein	K06967	0.00444177	NA	tRNA (adenine22-N1)-methyltransferase [EC:2.1.1.217]
K00240	0.0302467	M00009	succinate dehydrogenase / fumarate reductase, iron-sulfur subunit [EC:1.3.5.1 1.3.5.4]	K07476	0.00443758	NA	toprim domain protein
K00240	0.0302467	M00011	succinate dehydrogenase / fumarate reductase, iron-sulfur subunit [EC:1.3.5.1 1.3.5.4]	K09762	0.00443446	NA	uncharacterized protein
K00240	0.0302467	M00149	succinate dehydrogenase / fumarate reductase, iron-sulfur subunit [EC:1.3.5.1 1.3.5.4]	K19405	0.00443426	NA	protein arginine kinase [EC:2.7.14.1]
K11203	0.0302276	NA	fructose-like PTS system EIIC or EIIBC or EIIABC component	K13933	0.00442757	NA	malonate decarboxylase gamma subunit [EC:4.1.1.87]
K07677	0.0302224	NA	two-component system, NarL family, capsular synthesis sensor histidine kinase RcsC [EC:2.7.13.3]	K11689	0.00442545	NA	C4-dicarboxylate transporter, DctQ subunit
K02436	0.0302165	NA	DeoR family transcriptional regulator, galactitol utilization operon repressor	K17623	0.00441962	NA	pseudouridine 5'-phosphatase [EC:3.1.3.96]
K19338	0.030215	NA	LysR family transcriptional regulator, nitrogen assimilation regulatory protein	K22391	0.00440804	NA	GTP cyclohydrolase I [EC:3.5.4.16]
K19777	0.0302073	NA	acid stress chaperone HdeA	K06446	0.0044069	NA	acyl-CoA dehydrogenase [EC:1.3.99.-]
K07684	0.0301882	NA	two-component system, NarL family, nitrate/nitrite response regulator NarL	K02302	0.00440642	M00924	uroporphyrin-III C-methyltransferase / precorrin-2 dehydrogenase / sirohydrochlorin ferrochelatase [EC:2.1.1.107 1.3.1.76 4.99.1.4]
K06181	0.0301679	NA	23S rRNA pseudouridine2457 synthase [EC:5.4.99.20]	K03698	0.00439943	NA	3'-5' exoribonuclease [EC:3.1.-.-]
K05985	0.0301369	NA	ribonuclease M5 [EC:3.1.26.8]	K02703	0.0043986	M00161	photosystem II P680 reaction center D1 protein [EC:1.10.3.9]
K07275	0.0301151	NA	outer membrane protein	K01469	0.00439712	NA	5-oxoprolinase (ATP-hydrolysing) [EC:3.5.2.9]
K10545	0.0301078	NA	D-xylose transport system ATP-binding protein [EC:7.5.2.10]	K05563	0.0043946	NA	multicomponent K+:H+ antiporter subunit F
K21967	0.0301008	NA	Mat/Ecp fimbriae adhesin	K16787	0.0043923	NA	energy-coupling factor transport system ATP-binding protein [EC:3.6.3.-]
K02452	0.0300991	NA	general secretion pathway protein C	K19411	0.00439216	NA	protein arginine kinase activator
K03698	0.0300834	NA	3'-5' exoribonuclease [EC:3.1.-.-]	K02829	0.00439124	M00416	cytochrome aa3-600 menaquinol oxidase subunit IV [EC:7.1.1.5]
K02565	0.0300739	NA	N-acetylglucosamine repressor	K03862	0.00438204	NA	vanillate monooxygenase [EC:1.14.13.82]
K06222	0.0300735	NA	2,5-diketo-D-gluconate reductase B [EC:1.1.1.346]	K22086	0.00437817	NA	methylglutamate dehydrogenase subunit C [EC:1.5.99.5]
K05839	0.0299479	NA	haemolysin expression modulating protein	K01436	0.00437675	NA	amidohydrolase [EC:3.5.1.-]
K05541	0.0299353	NA	tRNA-dihydrouridine synthase C [EC:1.-.-.-]	K19300	0.00437534	NA	aminoglycoside 3'-phosphotransferase II [EC:2.7.1.95]
K14347	0.0299247	NA	solute carrier family 10 (sodium/bile acid cotransporter), member 7	K10546	0.00437507	NA	putative multiple sugar transport system substrate-binding protein
K01629	0.0298931	NA	rhamnulose-1-phosphate aldolase [EC:4.1.2.19]	K06358	0.00437417	NA	phosphatase RapK regulator
K08219	0.029893	NA	MFS transporter, UMF2 family, putative MFS family transporter protein	K22043	0.00437356	NA	ArsR family transcriptional regulator, zinc-responsive transcriptional repressor
K11896	0.0298899	NA	type VI secretion system protein ImpG	K11383	0.0043669	NA	two-component system, NtrC family, sensor histidine kinase KinB [EC:2.7.13.3]
K02069	0.0298712	NA	putative ABC transport system permease protein	K05526	0.00435902	NA	succinylglutamate desuccinylase [EC:3.5.1.96]
K03329	0.0298566	NA	amino acid exporter	K11442	0.00435852	NA	putative uridylyltransferase [EC:2.7.7.-]
K06145	0.0298527	NA	LacI family transcriptional regulator, gluconate utilization system Gnt-I transcriptional repressor	K01133	0.00435182	NA	choline-sulfatase [EC:3.1.6.6]
K07722	0.0298396	NA	CopG family transcriptional regulator, nickel-responsive regulator	K09123	0.00434742	NA	cis-L-3-hydroxyproline dehydratase [EC:4.2.1.171]
K13378	0.0298224	M00144	NADH-quinone oxidoreductase subunit C/D [EC:7.1.1.2]	K02116	0.00433895	NA	ATP synthase protein I
K03780	0.0298104	NA	L(+)-tartrate dehydratase beta subunit [EC:4.2.1.32]	K11020	0.00433851	NA	exotoxin A [EC:2.4.2.-]
K13771	0.0298019	NA	Rrf2 family transcriptional regulator, nitric oxide-sensitive transcriptional repressor	K17224	0.00433798	M00595	S-sulfosulfanyl-L-cysteine sulfohydrolase [EC:3.1.6.20]
K03583	0.0297994	NA	exodeoxyribonuclease V gamma subunit [EC:3.1.11.5]	K16242	0.0043379	M00548	phenol/toluene 2-monooxygenase (NADH) P3/A3 [EC:1.14.13.244 1.14.13.243]
K09917	0.0297972	NA	uncharacterized protein	K13531	0.0043299	NA	methylated-DNA-[protein]-cysteine S-methyltransferase [EC:2.1.1.63]
K07290	0.0297899	NA	AsmA family protein	K00808	0.00432567	NA	homospermidine synthase [EC:2.5.1.44]
K15587	0.0297617	NA	nickel transport system ATP-binding protein [EC:7.2.2.11]	K20329	0.00432344	NA	IclR family transcriptional regulator, positive regulator for flagellar biogenesis
K04085	0.0297565	NA	tRNA 2-thiouridine synthesizing protein A [EC:2.8.1.-]	K05340	0.00431977	NA	glucose uptake protein
K02572	0.0297532	NA	ferredoxin-type protein NapF	K09956	0.00431437	NA	uncharacterized protein
K01675	0.0297359	NA	fumarate hydratase D [EC:4.2.1.2]	K06313	0.00430931	NA	spore germination protein
K02745	0.0297198	NA	N-acetylgalactosamine PTS system EIIB component [EC:2.7.1.-]	K09772	0.00429527	NA	cell division inhibitor SepF
K19802	0.0297146	NA	L-Ala-D/L-Glu epimerase [EC:5.1.1.20]	K03202	0.00428895	NA	type IV secretion system protein VirB7
K02554	0.0296987	NA	2-keto-4-pentenoate hydratase [EC:4.2.1.80]	K13930	0.00428473	NA	triphosphoribosyl-dephospho-CoA synthase [EC:2.4.2.52]
K02445	0.0296971	NA	MFS transporter, OPA family, glycerol-3-phosphate transporter	K01635	0.00428457	NA	tagatose 1,6-diphosphate aldolase [EC:4.1.2.40]
K03620	0.0296395	NA	Ni/Fe-hydrogenase 1 B-type cytochrome subunit	K22548	0.00428283	NA	trans-L-3-hydroxyproline dehydratase [EC:4.2.1.77]
K05601	0.0296378	NA	hydroxylamine reductase [EC:1.7.99.1]	K21898	0.00427826	M00876	ornithine racemase [EC:5.1.1.12]
K23393	0.029633	NA	lipid II isoglutaminyl synthase (glutamine-hydrolysing) [EC:6.3.5.13]	K06429	0.00427523	NA	small acid-soluble spore protein L (minor)
K22719	0.0296186	NA	murein hydrolase activator	K00435	0.00427497	M00926	hydrogen peroxide-dependent heme synthase [EC:1.3.98.5]
K03599	0.0296062	NA	stringent starvation protein A	K16839	0.00427358	M00546	FAD-dependent urate hydroxylase [EC:1.14.13.113]
K11925	0.0296057	NA	SgrR family transcriptional regulator	K02228	0.00426463	NA	precorrin-6A synthase [EC:2.1.1.152]
K03826	0.0296029	NA	putative acetyltransferase [EC:2.3.1.-]	K06365	0.00426102	NA	response regulator aspartate phosphatase G [EC:3.1.-.-]
K03839	0.0295693	NA	flavodoxin I	K19609	0.00425594	NA	two-component system, OmpR family, sensor histidine kinase PfeS [EC:2.7.13.3]
K07791	0.0295528	NA	anaerobic C4-dicarboxylate transporter DcuA	K11024	0.0042528	M00574	pertussis toxin subunit 2
K19222	0.0295491	M00116	1,4-dihydroxy-2-naphthoyl-CoA hydrolase [EC:3.1.2.28]	K17675	0.00425212	NA	ATP-dependent RNA helicase SUPV3L1/SUV3 [EC:3.6.4.13]
K09477	0.0295335	NA	citrate:succinate antiporter	K00955	0.00424358	NA	bifunctional enzyme CysN/CysC [EC:2.7.7.4 2.7.1.25]
K18968	0.0295234	NA	diguanylate cyclase [EC:2.7.7.65]	K19713	0.00423889	NA	thiosulfate dehydrogenase [EC:1.8.2.2]
K04062	0.0295146	NA	osmotically inducible lipoprotein OsmB	K00283	0.00423854	NA	glycine dehydrogenase subunit 2 [EC:1.4.4.2]
K02517	0.0295053	M00060	Kdo2-lipid IVA lauroyltransferase/acyltransferase [EC:2.3.1.241 2.3.1.-]	K19982	0.00423849	M00790	aminopyrrolnitrin oxygenase [EC:1.14.13.-]
K14591	0.0294932	NA	protein AroM	K17321	0.00422459	NA	glycerol transport system substrate-binding protein
K18988	0.0294899	NA	serine-type D-Ala-D-Ala carboxypeptidase/endopeptidase [EC:3.4.16.4 3.4.21.-]	K13599	0.00422404	NA	two-component system, NtrC family, nitrogen regulation response regulator NtrX
K01175	0.0294802	NA	esterase [EC:3.1.-.-]	K22955	0.00422376	NA	acyl homoserine lactone synthase [EC:2.3.1.184]
K07030	0.029425	NA	uncharacterized protein	K00102	0.00422334	NA	D-lactate dehydrogenase (cytochrome) [EC:1.1.2.4]
K20881	0.0294045	NA	5'-nucleotidase [EC:3.1.3.5]	K01040	0.0042232	NA	glutaconate CoA-transferase, subunit B [EC:2.8.3.12]
K07289	0.0294028	NA	AsmA protein	K04092	0.00422309	NA	chorismate mutase [EC:5.4.99.5]
K03825	0.0293975	NA	L-phenylalanine/L-methionine N-acetyltransferase [EC:2.3.1.53 2.3.1.-]	K13770	0.00422038	NA	TetR/AcrR family transcriptional regulator, fatty acid metabolism regulator protein
K07336	0.0293743	NA	PKHD-type hydroxylase [EC:1.14.11.-]	K22085	0.00421696	NA	methylglutamate dehydrogenase subunit B [EC:1.5.99.5]
K05590	0.029363	NA	ATP-dependent RNA helicase SrmB [EC:3.6.4.13]	K13934	0.00421408	NA	phosphoribosyl-dephospho-CoA transferase [EC:2.7.7.66]
K04084	0.0293465	NA	thioredoxin:protein disulfide reductase [EC:1.8.4.16]	K04056	0.0042126	NA	type III secretion protein O
K08296	0.0293412	NA	phosphohistidine phosphatase [EC:3.1.3.-]	K01713	0.00420876	NA	cyclohexadienyl dehydratase [EC:4.2.1.51 4.2.1.91]
K06200	0.0293325	NA	carbon starvation protein	K07704	0.00420454	NA	two-component system, LytTR family, sensor histidine kinase LytS [EC:2.7.13.3]
K07223	0.0293214	NA	porphyrinogen peroxidase [EC:1.11.1.-]	K06317	0.00420255	NA	inhibitor of the pro-sigma K processing machinery
K21087	0.0293101	NA	flagellar brake protein	K16937	0.00420239	NA	thiosulfate dehydrogenase (quinone) large subunit [EC:1.8.5.2]
K23508	0.0292962	NA	galactofuranose transport system substrate-binding protein	K00632	0.00420178	M00087	acetyl-CoA acyltransferase [EC:2.3.1.16]
K04032	0.0292817	NA	ethanolamine utilization cobalamin adenosyltransferase [EC:2.5.1.17]	K19746	0.00419134	M00947	D-arginine dehydrogenase [EC:1.4.99.6]
K03760	0.0292387	NA	lipid A ethanolaminephosphotransferase [EC:2.7.8.43]	K04566	0.00418976	NA	lysyl-tRNA synthetase, class I [EC:6.1.1.6]
K07663	0.0292277	NA	two-component system, OmpR family, catabolic regulation response regulator CreB	K01780	0.00418758	M00949	histidine racemase [EC:5.1.1.24]
K09807	0.0292193	NA	uncharacterized protein	K21603	0.00417236	NA	two-component system, OmpR family, flagellar system response regulator FtcR
K23016	0.0292071	NA	MFS transporter, ACS family, L-galactonate transporter	K08983	0.00416909	NA	putative membrane protein
K09456	0.0291923	NA	putative acyl-CoA dehydrogenase	K02352	0.00416704	NA	lactonase [EC:3.1.1.-]
K12340	0.0291725	NA	outer membrane protein	K03863	0.00416594	NA	vanillate monooxygenase ferredoxin subunit
K22304	0.0291527	NA	cell division inhibition protein DicB	K13789	0.00416293	NA	geranylgeranyl diphosphate synthase, type II [EC:2.5.1.1 2.5.1.10 2.5.1.29]
K00758	0.02915	NA	thymidine phosphorylase [EC:2.4.2.4]	K09976	0.00415372	NA	uncharacterized protein
K03613	0.0291476	NA	Na+-translocating ferredoxin:NAD+ oxidoreductase subunit E	K10619	0.00415222	NA	p-cumate 2,3-dioxygenase subunit alpha [EC:1.14.12.25]
K09904	0.0291167	NA	uncharacterized protein	K12269	0.00415182	NA	accessory secretory protein Asp2
K03074	0.0291125	NA	preprotein translocase subunit SecF	K07775	0.00414548	NA	two-component system, OmpR family, response regulator ResD
K22489	0.0291071	NA	MarR family transcriptional regulator, temperature-dependent positive regulator of motility	K16556	0.00414352	NA	succinoglycan biosynthesis protein ExoM [EC:2.4.-.-]
K17948	0.0290875	NA	N-acetylneuraminate epimerase [EC:5.1.3.24]	K09948	0.00414172	NA	uncharacterized protein
K10542	0.0290751	NA	methyl-galactoside transport system ATP-binding protein [EC:7.5.2.11]	K01484	0.00414026	NA	succinylarginine dihydrolase [EC:3.5.3.23]
K10110	0.0290677	NA	maltose/maltodextrin transport system permease protein	K13485	0.0041302	M00546	2-oxo-4-hydroxy-4-carboxy-5-ureidoimidazoline decarboxylase [EC:4.1.1.97]
K06164	0.0290665	NA	alpha-D-ribose 1-methylphosphonate 5-triphosphate synthase subunit PhnI [EC:2.7.8.37]	K08221	0.00412695	NA	MFS transporter, ACDE family, multidrug resistance protein
K01975	0.0290509	NA	RNA 2',3'-cyclic 3'-phosphodiesterase [EC:3.1.4.58]	K10531	0.00412401	NA	L-ornithine N5-monooxygenase [EC:1.14.13.195 1.14.13.196]
K19810	0.0290406	NA	L-lysine 2,3-aminomutase [EC:5.4.3.-]	K13732	0.00411811	NA	fibronectin-binding protein A
K09994	0.0290058	NA	(aminoalkyl)phosphonate N-acetyltransferase [EC:2.3.1.280]	K22617	0.00411489	NA	lyso-ornithine lipid O-acyltransferase [EC:2.3.1.270]
K03098	0.0289998	NA	apolipoprotein D and lipocalin family protein	K06297	0.00411421	NA	spore germination protein KC
K09961	0.0289966	NA	uncharacterized protein	K18905	0.00411192	NA	TetR/AcrR family transcriptional regulator, repressor of the ameABC operon
K00868	0.0289628	NA	pyridoxine kinase [EC:2.7.1.35]	K11918	0.00411097	NA	type VI secretion system protein
K02339	0.0289602	NA	DNA polymerase III subunit chi [EC:2.7.7.7]	K09167	0.00410061	NA	uncharacterized protein
K11926	0.0289499	NA	sigma factor-binding protein Crl	K11618	0.00409976	NA	two-component system, NarL family, response regulator LiaR
K07533	0.0289415	NA	foldase protein PrsA [EC:5.2.1.8]	K07050	0.00409338	NA	misacylated tRNA(Ala) deacylase [EC:3.1.1.-]
K00060	0.0289398	NA	threonine 3-dehydrogenase [EC:1.1.1.103]	K06948	0.00409047	NA	30S ribosome assembly GTPase
K01895	0.0289305	NA	acetyl-CoA synthetase [EC:6.2.1.1]	K18100	0.00408551	NA	rhamnosyltransferase subunit A [EC:2.4.1.-]
K03435	0.0288958	NA	LacI family transcriptional regulator, fructose operon transcriptional repressor	K14987	0.00408546	NA	two-component system, LuxR family, response regulator FixJ
K04338	0.0288919	NA	curli production assembly/transport component CsgF	K21494	0.00408418	NA	antitoxin YxxD
K21959	0.0288893	NA	LysR family transcriptional regulator, cell division regulator	K09989	0.00408165	NA	uncharacterized protein
K07687	0.0288638	NA	two-component system, NarL family, captular synthesis response regulator RcsB	K16872	0.0040813	NA	beta-ketodecanoyl-[acyl-carrier-protein] synthase [EC:2.3.1.207]
K02461	0.0288238	NA	general secretion pathway protein L	K18940	0.00407859	NA	two-component system, OmpR family, sensor histidine kinase ArlS [EC:2.7.13.3]
K03151	0.0287662	M00127	tRNA uracil 4-sulfurtransferase [EC:2.8.1.4]	K06336	0.00407658	NA	spore coat-associated protein N
K07147	0.0287442	NA	methionine sulfoxide reductase catalytic subunit [EC:1.8.-.-]	K17323	0.00407488	NA	glycerol transport system permease protein
K05844	0.0287305	NA	ribosomal protein S6--L-glutamate ligase [EC:6.3.2.-]	K23063	0.00406867	NA	hydroxyproline transport system permease protein
K03666	0.0287173	NA	host factor-I protein	K16552	0.00406183	NA	polysaccharide biosynthesis/export protein ExoF
K02018	0.0287075	NA	molybdate transport system permease protein	K15554	0.0040615	NA	sulfonate transport system permease protein
K01839	0.0286684	NA	phosphopentomutase [EC:5.4.2.7]	K14540	0.00405641	NA	ribosome biogenesis GTPase A
K00342	0.0286498	M00144	NADH-quinone oxidoreductase subunit M [EC:7.1.1.2]	K16303	0.00405502	NA	p-cumate 2,3-dioxygenase subunit beta [EC:1.14.12.25]
K07048	0.0286489	NA	phosphotriesterase-related protein	K00035	0.00405204	NA	D-galactose 1-dehydrogenase [EC:1.1.1.48]
K11216	0.0286432	NA	autoinducer-2 kinase [EC:2.7.1.189]	K06303	0.00405058	NA	spore germination protein PE
K00647	0.0286327	M00083	3-oxoacyl-[acyl-carrier-protein] synthase I [EC:2.3.1.41]	K11635	0.00404601	NA	putative ABC transport system ATP-binding protein
K00647	0.0286327	M00572	3-oxoacyl-[acyl-carrier-protein] synthase I [EC:2.3.1.41]	K02862	0.00404507	NA	putative membrane protein
K07406	0.0286184	NA	alpha-galactosidase [EC:3.2.1.22]	K16247	0.00404228	NA	LuxR family transcriptional regulator, glucitol operon activator
K16138	0.0286094	NA	TetR/AcrR family transcriptional regulator, repressor for uid operon	K23361	0.00404168	NA	MFS transporter, DHA1 family, staphyloferrin B biosynthesis exporter
K03814	0.0285926	NA	monofunctional glycosyltransferase [EC:2.4.1.129]	K21472	0.0040365	NA	peptidoglycan LD-endopeptidase LytH [EC:3.4.-.-]
K19611	0.0285909	NA	ferric enterobactin receptor	K24072	0.00403514	NA	positive control factor
K00684	0.0285685	NA	leucyl/phenylalanyl-tRNA---protein transferase [EC:2.3.2.6]	K01261	0.00402459	NA	glutamyl aminopeptidase [EC:3.4.11.7]
K03326	0.0285621	NA	C4-dicarboxylate transporter, DcuC family	K06160	0.00401919	NA	putative pyoverdin transport system ATP-binding/permease protein
K03609	0.0285271	NA	septum site-determining protein MinD	K00015	0.00401556	NA	glyoxylate reductase [EC:1.1.1.26]
K11733	0.0285232	NA	lysine-specific permease	K10255	0.00401529	NA	acyl-lipid omega-6 desaturase (Delta-12 desaturase) [EC:1.14.19.23 1.14.19.45]
K05997	0.028515	NA	Fe-S cluster assembly protein SufA	K10215	0.00400685	NA	monooxygenase [EC:1.14.13.-]
K07034	0.0284764	NA	uncharacterized protein	K12252	0.00400518	NA	arginine:pyruvate transaminase [EC:2.6.1.84]
K02418	0.0284703	NA	flagellar protein FliO/FliZ	K11686	0.00400273	NA	chromosome-anchoring protein RacA
K14287	0.0284613	NA	methionine transaminase [EC:2.6.1.88]	K09693	0.00400223	NA	teichoic acid transport system ATP-binding protein [EC:7.5.2.4]
K10541	0.0284455	NA	methyl-galactoside transport system permease protein	K23062	0.00399873	NA	hydroxyproline transport system permease protein
K07269	0.0284043	NA	uncharacterized protein	K05985	0.00399606	NA	ribonuclease M5 [EC:3.1.26.8]
K03577	0.0283832	NA	TetR/AcrR family transcriptional regulator, acrAB operon repressor	K18164	0.00398857	NA	NADH dehydrogenase [ubiquinone] 1 alpha subcomplex assembly factor 7
K20866	0.0283752	NA	glucose-1-phosphatase [EC:3.1.3.10]	K10227	0.00398239	NA	sorbitol/mannitol transport system substrate-binding protein
K12289	0.0283695	NA	pilus assembly protein HofN	K05564	0.00397952	NA	multicomponent K+:H+ antiporter subunit G
K05939	0.028342	NA	acyl-[acyl-carrier-protein]-phospholipid O-acyltransferase / long-chain-fatty-acid--[acyl-carrier-protein] ligase [EC:2.3.1.40 6.2.1.20]	K11916	0.00397867	NA	serine/threonine-protein kinase Stk1 [EC:2.7.11.-]
K09913	0.0283282	NA	purine/pyrimidine-nucleoside phosphorylase [EC:2.4.2.1 2.4.2.2]	K10564	0.00397348	NA	chemotaxis protein MotC
K00101	0.0283265	NA	L-lactate dehydrogenase (cytochrome) [EC:1.1.2.3]	K14267	0.00396795	NA	N-succinyldiaminopimelate aminotransferase [EC:2.6.1.17]
K12973	0.0283046	NA	lipid IVA palmitoyltransferase [EC:2.3.1.251]	K09984	0.00396564	NA	uncharacterized protein
K09980	0.0282675	NA	uncharacterized protein	K09947	0.0039651	NA	uncharacterized protein
K02846	0.0282656	NA	N-methyl-L-tryptophan oxidase [EC:1.5.3.-]	K00479	0.00395879	NA	glycine betaine catabolism A
K17290	0.028264	NA	oxidoreductase [EC:1.1.1.-]	K07215	0.00395546	NA	heme oxygenase (biliverdin-IX-beta and delta-forming) [EC:1.14.99.58]
K11249	0.0282607	NA	cysteine/O-acetylserine efflux protein	K21462	0.00395388	NA	probable poly-beta-1,6-N-acetyl-D-glucosamine export protein
K02535	0.028244	M00060	UDP-3-O-[3-hydroxymyristoyl] N-acetylglucosamine deacetylase [EC:3.5.1.108]	K09963	0.00395384	NA	uncharacterized protein
K05527	0.0282037	NA	BolA family transcriptional regulator, general stress-responsive regulator	K03520	0.00394776	NA	aerobic carbon-monoxide dehydrogenase large subunit [EC:1.2.5.3]
K07643	0.0281999	NA	two-component system, OmpR family, sensor histidine kinase BasS [EC:2.7.13.3]	K19623	0.00394716	NA	two-component system, probable response regulator PhcQ
K22230	0.0281986	NA	scyllo-inositol 2-dehydrogenase (NADP+) [EC:1.1.1.-]	K01578	0.00394419	NA	malonyl-CoA decarboxylase [EC:4.1.1.9]
K02047	0.0281847	NA	sulfate/thiosulfate transport system permease protein	K20261	0.00394368	NA	trans-2,3-dihydro-3-hydroxyanthranilic acid synthase [EC:3.3.2.15]
K03753	0.0281762	NA	molybdopterin-guanine dinucleotide biosynthesis adapter protein	K13935	0.00392988	NA	malonate decarboxylase epsilon subunit [EC:2.3.1.39]
K11895	0.0281439	NA	type VI secretion system protein ImpH	K07015	0.00392776	NA	uncharacterized protein
K03646	0.028113	NA	colicin import membrane protein	K16705	0.0039248	NA	teichuronic acid biosynthesis protein TuaE
K03612	0.0280811	NA	Na+-translocating ferredoxin:NAD+ oxidoreductase subunit G	K02661	0.00392076	NA	type IV pilus assembly protein PilK
K11104	0.0280765	NA	melibiose permease	K05311	0.00391299	NA	central glycolytic genes regulator
K03777	0.0280573	NA	D-lactate dehydrogenase (quinone) [EC:1.1.5.12]	K17325	0.00390736	NA	glycerol transport system ATP-binding protein
K02048	0.0280571	NA	sulfate/thiosulfate transport system substrate-binding protein	K11783	0.0038924	M00930	futalosine hydrolase [EC:3.2.2.26]
K06076	0.0280397	NA	long-chain fatty acid transport protein	K06600	0.00388365	NA	chemosensory pili system protein ChpE
K07712	0.0280167	NA	two-component system, NtrC family, nitrogen regulation response regulator GlnG	K12268	0.00387984	NA	accessory secretory protein Asp1
K03718	0.0280116	NA	Lrp/AsnC family transcriptional regulator, regulator for asnA, asnC and gidA	K07719	0.00387514	NA	two-component system, response regulator YcbB
K03635	0.0280057	M00880	molybdopterin synthase catalytic subunit [EC:2.8.1.12]	K16169	0.00386974	NA	xanthine permease
K01070	0.0280019	NA	S-formylglutathione hydrolase [EC:3.1.2.12]	K17662	0.00386704	NA	cytochrome b pre-mRNA-processing protein 3
K10015	0.0279799	NA	histidine transport system permease protein	K16320	0.00386639	M00637	anthranilate 1,2-dioxygenase small subunit [EC:1.14.12.1]
K01744	0.0279561	NA	aspartate ammonia-lyase [EC:4.3.1.1]	K17223	0.00386273	M00595	L-cysteine S-thiosulfotransferase [EC:2.8.5.2]
K09927	0.0279492	NA	uncharacterized protein	K11444	0.00386145	NA	two-component system, chemotaxis family, response regulator WspR [EC:2.7.7.65]
K05820	0.027948	NA	MFS transporter, PPP family, 3-phenylpropionic acid transporter	K06991	0.00385644	NA	uncharacterized protein
K03828	0.0279151	NA	putative acetyltransferase [EC:2.3.1.-]	K20455	0.00383908	NA	2-methylcitrate dehydratase (2-methyl-trans-aconitate forming) [EC:4.2.1.117]
K09016	0.0278941	NA	putative pyrimidine permease RutG	K01995	0.00383752	NA	branched-chain amino acid transport system ATP-binding protein
K19804	0.0278238	NA	lipopolysaccharide assembly protein B	K09985	0.00383089	NA	uncharacterized protein
K02647	0.0278209	NA	carbohydrate diacid regulator	K07694	0.00382367	NA	two-component system, NarL family, vancomycin resistance associated response regulator VraR
K11933	0.0277868	NA	NADH oxidoreductase Hcr [EC:1.-.-.-]	K02826	0.00382132	M00416	cytochrome aa3-600 menaquinol oxidase subunit II [EC:7.1.1.5]
K01521	0.0277762	NA	CDP-diacylglycerol pyrophosphatase [EC:3.6.1.26]	K02347	0.00382085	NA	DNA polymerase (family X)
K02362	0.0277418	NA	enterobactin synthetase component D [EC:6.3.2.14 2.7.8.-]	K03937	0.00381635	NA	NADH dehydrogenase (ubiquinone) Fe-S protein 4
K03610	0.0277366	NA	septum site-determining protein MinC	K11384	0.0038155	NA	two-component system, NtrC family, response regulator AlgB
K00117	0.027736	NA	quinoprotein glucose dehydrogenase [EC:1.1.5.2]	K10823	0.00381468	NA	oligopeptide transport system ATP-binding protein
K01252	0.0277284	NA	bifunctional isochorismate lyase / aryl carrier protein [EC:3.3.2.1 6.3.2.14]	K20977	0.0038118	NA	two-component system, HptB-dependent secretion and biofilm response regulator
K20543	0.0276761	NA	cellulose synthase operon protein C	K18073	0.00380958	M00745	two-component system, OmpR family, response regulator ParR
K02839	0.0276457	NA	peptide chain release factor	K00126	0.00380885	NA	formate dehydrogenase subunit delta [EC:1.17.1.9]
K02430	0.027615	NA	DeoR family transcriptional regulator, L-fucose operon activator	K06369	0.00379473	NA	response regulator aspartate phosphatase K [EC:3.1.-.-]
K07000	0.0275935	NA	uncharacterized protein	K02638	0.00379053	NA	plastocyanin
K02468	0.027558	NA	DeoR family transcriptional regulator, glucitol operon repressor	K07777	0.00379023	NA	two-component system, NarL family, sensor histidine kinase DegS [EC:2.7.13.3]
K00146	0.0275252	NA	phenylacetaldehyde dehydrogenase [EC:1.2.1.39]	K01721	0.0037842	NA	nitrile hydratase subunit alpha [EC:4.2.1.84]
K07816	0.0275156	NA	putative GTP pyrophosphokinase [EC:2.7.6.5]	K13928	0.00378084	NA	LysR family transcriptional regulator, malonate utilization transcriptional regulator
K00906	0.0275049	NA	isocitrate dehydrogenase kinase/phosphatase [EC:2.7.11.5 3.1.3.-]	K18910	0.00377806	NA	D-psicose/D-tagatose/L-ribulose 3-epimerase [EC:5.1.3.30 5.1.3.31]
K03700	0.0274856	NA	recombination protein U	K10907	0.00377708	NA	aminotransferase [EC:2.6.1.-]
K06967	0.0274771	NA	tRNA (adenine22-N1)-methyltransferase [EC:2.1.1.217]	K02240	0.00375949	NA	competence protein ComFA
K03755	0.0274708	NA	AraC family transcriptional regulator, transcriptional activator of adiA	K15518	0.00375651	NA	deoxyguanosine kinase [EC:2.7.1.113]
K04764	0.0274378	NA	integration host factor subunit alpha	K18649	0.00375641	NA	inositol-phosphate phosphatase / L-galactose 1-phosphate phosphatase / histidinol-phosphatase [EC:3.1.3.25 3.1.3.93 3.1.3.15]
K03748	0.027436	NA	SanA protein	K06296	0.0037555	NA	spore germination protein KB
K12684	0.0274294	NA	serine protease autotransporter [EC:3.4.21.-]	K14657	0.00375372	NA	LysR family transcriptional regulator, nod-box dependent transcriptional activator
K03970	0.0274208	NA	phage shock protein B	K13481	0.00375351	NA	xanthine dehydrogenase small subunit [EC:1.17.1.4]
K16348	0.0274103	NA	entericidin B	K00754	0.00374947	NA	L-malate glycosyltransferase [EC:2.4.1.-]
K10906	0.0273836	NA	exodeoxyribonuclease VIII [EC:3.1.11.-]	K06602	0.00374591	NA	flagellar protein FlaF
K19745	0.0273775	NA	acrylyl-CoA reductase (NADPH) [EC:1.3.1.-]	K22342	0.00374516	NA	dimethylamine monooxygenase subunit A [EC:1.14.13.238]
K02192	0.0273631	NA	bacterioferritin-associated ferredoxin	K21000	0.00374297	NA	polysaccharide biosynthesis protein PslG
K01782	0.0273521	NA	3-hydroxyacyl-CoA dehydrogenase / enoyl-CoA hydratase / 3-hydroxybutyryl-CoA epimerase [EC:1.1.1.35 4.2.1.17 5.1.2.3]	K18924	0.00374253	NA	paired small multidrug resistance pump
K05516	0.0273409	NA	curved DNA-binding protein	K18304	0.00373704	M00769	LuxR family transcriptional regulator, quorum-sensing system regulator LasR
K02796	0.0273	NA	mannose PTS system EIID component	K00958	0.00373553	M00596	sulfate adenylyltransferase [EC:2.7.7.4]
K19778	0.0272982	NA	acid stress chaperone HdeB	K08222	0.00373215	NA	MFS transporter, YQGE family, putative transporter
K07115	0.0272813	NA	23S rRNA (adenine2030-N6)-methyltransferase [EC:2.1.1.266]	K15520	0.00372938	NA	mycothiol synthase [EC:2.3.1.189]
K03796	0.0272744	NA	Bax protein	K21949	0.00372905	M00875	N-(2-amino-2-carboxyethyl)-L-glutamate synthase [EC:2.5.1.140]
K09817	0.0272719	NA	zinc transport system ATP-binding protein [EC:7.2.2.-]	K03713	0.00372682	NA	MerR family transcriptional regulator, glutamine synthetase repressor
K21430	0.0272704	NA	aldose sugar dehydrogenase [EC:1.1.5.-]	K23677	0.00372502	NA	MFS transporter, Spinster family, sphingosine-1-phosphate transporter
K00769	0.0272543	NA	xanthine phosphoribosyltransferase [EC:2.4.2.22]	K21002	0.00372346	NA	polysaccharide biosynthesis protein PslI
K09912	0.0272389	NA	uncharacterized protein	K11914	0.00372245	NA	sigma-54 dependent transcriptional regulator
K06140	0.0272273	NA	regulator of nucleoside diphosphate kinase	K21834	0.00372215	NA	dimethylglycine catabolism B
K21469	0.02721	NA	serine-type D-Ala-D-Ala carboxypeptidase [EC:3.4.16.4]	K06134	0.00371662	NA	3-demethoxyubiquinol 3-hydroxylase [EC:1.14.99.60]
K21948	0.0271725	NA	3-dehydrotetronate 4-kinase [EC:2.7.1.217]	K03471	0.00371558	NA	ribonuclease HIII [EC:3.1.26.4]
K06189	0.0271482	NA	magnesium and cobalt transporter	K13932	0.00370217	NA	malonate decarboxylase beta subunit [EC:4.1.1.87]
K18765	0.0271441	NA	RNase E specificity factor CsrD	K09822	0.00370081	NA	uncharacterized protein
K02020	0.0271392	NA	molybdate transport system substrate-binding protein	K05565	0.00369824	NA	multicomponent Na+:H+ antiporter subunit A
K18889	0.0271276	NA	ATP-binding cassette, subfamily B, multidrug efflux pump	K23734	0.00367982	M00883	lipoyl(octanoyl) transferase [EC:2.3.1.181]
K00390	0.0271216	M00176	phosphoadenosine phosphosulfate reductase [EC:1.8.4.8 1.8.4.10]	K10851	0.0036786	NA	nitrogen regulatory protein A
K13628	0.0270939	NA	iron-sulfur cluster assembly protein	K21161	0.00367852	M00824	enediyne biosynthesis protein E3
K16328	0.0270884	NA	pseudouridine kinase [EC:2.7.1.83]	K02657	0.00367586	NA	twitching motility two-component system response regulator PilG
K07862	0.0270776	NA	serine/threonine transporter	K07696	0.00367169	NA	two-component system, NarL family, response regulator NreC
K03803	0.0270269	NA	sigma-E factor negative regulatory protein RseC	K23995	0.00367139	M00174	lanthanide-dependent methanol dehydrogenase [EC:1.1.2.10]
K02498	0.0270212	NA	HemY protein	K06284	0.00367068	NA	AbrB family transcriptional regulator, transcriptional pleiotropic regulator of transition state genes
K05804	0.0270178	NA	AraC family transcriptional regulator, mar-sox-rob regulon activator	K06404	0.0036666	NA	stage V sporulation protein AB
K21086	0.0270146	NA	c-di-GMP phosphodiesterase [EC:3.1.4.52]	K13533	0.00366121	NA	two-component system, sporulation sensor kinase E [EC:2.7.13.3]
K11928	0.0269944	NA	sodium/proline symporter	K10815	0.00365973	NA	hydrogen cyanide synthase HcnB [EC:1.4.99.5]
K21990	0.0269737	NA	formate-nitrite transporter family protein	K18298	0.00365783	M00641	membrane fusion protein, multidrug efflux system
K03981	0.0269581	NA	thiol:disulfide interchange protein DsbC [EC:5.3.4.1]	K18567	0.00365639	NA	MFS transporter, DHA1 family, purine base/nucleoside efflux pump
K18691	0.0269423	NA	membrane-bound lytic murein transglycosylase F [EC:4.2.2.-]	K21020	0.00365549	NA	diguanylate cyclase [EC:2.7.7.65]
K09001	0.0268931	NA	anhydro-N-acetylmuramic acid kinase [EC:2.7.1.170]	K16554	0.00365363	NA	polysaccharide biosynthesis transport protein
K02315	0.0268719	NA	DNA replication protein DnaC	K10552	0.00364718	NA	fructose transport system substrate-binding protein
K07018	0.0268675	NA	uncharacterized protein	K07683	0.00364041	NA	two-component system, NarL family, sensor histidine kinase NreB [EC:2.7.13.3]
K03387	0.0268046	NA	NADH-dependent peroxiredoxin subunit F [EC:1.8.1.-]	K06953	0.0036379	NA	uncharacterized protein
K06938	0.0267997	NA	uncharacterized protein	K07161	0.00363525	NA	uncharacterized protein
K14261	0.0267789	NA	alanine-synthesizing transaminase [EC:2.6.1.-]	K21453	0.00363469	NA	TetR/AcrR family transcriptional regulator, biofilm operon repressor
K04691	0.0267622	NA	serine protease DegS [EC:3.4.21.-]	K18101	0.00363325	NA	rhamnosyltransferase subunit B [EC:2.4.1.-]
K09963	0.0267533	NA	uncharacterized protein	K13012	0.00363085	NA	O-antigen biosynthesis protein WbqP
K06206	0.0267448	NA	sugar fermentation stimulation protein A	K06343	0.00362957	NA	spore coat protein Y
K21028	0.0267142	NA	molybdopterin synthase sulfurtransferase [EC:2.8.1.11]	K06431	0.00362871	NA	small acid-soluble spore protein N (minor)
K03756	0.0267139	NA	putrescine:ornithine antiporter	K06286	0.00361505	NA	septation ring formation regulator
K07340	0.0266825	NA	inner membrane protein	K11145	0.00360579	NA	ribonuclease III family protein [EC:3.1.26.-]
K02398	0.0266563	NA	negative regulator of flagellin synthesis FlgM	K07020	0.00360038	NA	uncharacterized protein
K00860	0.0266382	M00176	adenylylsulfate kinase [EC:2.7.1.25]	K03708	0.00359508	NA	transcriptional regulator of stress and heat shock response
K07350	0.0266301	NA	minor fimbrial subunit	K05352	0.00359185	NA	ribitol-5-phosphate 2-dehydrogenase (NADP+) [EC:1.1.1.405]
K05777	0.0266103	NA	putative thiamine transport system substrate-binding protein	K11731	0.00358988	NA	citronellyl-CoA dehydrogenase [EC:1.3.99.-]
K19162	0.026604	NA	hha toxicity modulator TomB	K20327	0.00358753	NA	glycosyltransferase XagB
K00610	0.0265923	NA	aspartate carbamoyltransferase regulatory subunit	K07176	0.00358614	NA	putative serine/threonine protein kinase
K07724	0.0265792	NA	Ner family transcriptional regulator	K11619	0.0035833	NA	lia operon protein LiaI
K09890	0.0265769	NA	alternative ribosome-rescue factor	K07338	0.00358126	NA	uncharacterized protein
K03690	0.026526	NA	ubiquinone biosynthesis protein UbiJ	K04054	0.00358077	NA	type III secretion protein K
K03831	0.0265146	M00880	molybdopterin adenylyltransferase [EC:2.7.7.75]	K09709	0.00357903	NA	3-methylfumaryl-CoA hydratase [EC:4.2.1.153]
K07740	0.0264814	NA	regulator of sigma D	K23057	0.00357777	NA	putative lysine/arginine/ornithine/histidine/octopine transport system permease protein
K09786	0.0264804	NA	uncharacterized protein	K13931	0.00357225	NA	malonate decarboxylase delta subunit
K01643	0.0264762	NA	citrate lyase subunit alpha / citrate CoA-transferase [EC:2.8.3.10]	K11042	0.00357154	NA	superantigen-like protein 1
K07106	0.0264541	NA	N-acetylmuramic acid 6-phosphate etherase [EC:4.2.1.126]	K11443	0.00357085	NA	two-component system, cell cycle response regulator DivK
K20542	0.0264519	NA	endoglucanase [EC:3.2.1.4]	K09950	0.00357065	NA	uncharacterized protein
K06197	0.0264516	NA	cation transport regulator	K06306	0.00356648	NA	spore germination protein
K05801	0.0264323	NA	DnaJ like chaperone protein	K11210	0.00356632	NA	metallothiol transferase [EC:2.5.1.-]
K07026	0.0264256	NA	mannosyl-3-phosphoglycerate phosphatase [EC:3.1.3.70]	K04768	0.00356525	NA	acetoin utilization protein AcuC
K01974	0.0264251	NA	RNA 3'-terminal phosphate cyclase (ATP) [EC:6.5.1.4]	K06308	0.00355722	NA	spore germination protein
K05814	0.0264127	NA	sn-glycerol 3-phosphate transport system permease protein	K06304	0.00355688	NA	spore germination protein PF
K11939	0.0264122	NA	inner membrane transporter RhtA	K11181	0.00354971	M00596	dissimilatory sulfite reductase beta subunit [EC:1.8.99.5]
K09781	0.0264013	NA	uncharacterized protein	K12987	0.00354584	NA	alpha-1,6-rhamnosyltransferase [EC:2.4.1.-]
K08298	0.0263939	NA	L-carnitine CoA-transferase [EC:2.8.3.21]	K14083	0.00354482	NA	trimethylamine---corrinoid protein Co-methyltransferase [EC:2.1.1.250]
K01646	0.0263573	NA	citrate lyase subunit gamma (acyl carrier protein)	K02225	0.00354369	NA	cobalamin biosynthetic protein CobC
K01661	0.0263566	M00116	naphthoate synthase [EC:4.1.3.36]	K06329	0.00353915	NA	spore coat protein F
K02426	0.0263537	NA	cysteine desulfuration protein SufE	K10681	0.00353561	NA	two-component system, OmpR family, sensor histidine kinase SaeS [EC:2.7.13.3]
K01138	0.0263237	NA	uncharacterized sulfatase [EC:3.1.6.-]	K14268	0.00353541	NA	5-aminovalerate/4-aminobutyrate aminotransferase [EC:2.6.1.48 2.6.1.19]
K01577	0.0262968	NA	oxalyl-CoA decarboxylase [EC:4.1.1.8]	K18661	0.0035337	NA	malonyl-CoA/methylmalonyl-CoA synthetase [EC:6.2.1.-]
K04755	0.0262607	NA	ferredoxin, 2Fe-2S	K10944	0.00353259	M00174	methane/ammonia monooxygenase subunit A [EC:1.14.18.3 1.14.99.39]
K08225	0.0262427	NA	MFS transporter, ENTS family, enterobactin (siderophore) exporter	K09813	0.00353158	NA	hemin transport system permease protein
K23773	0.02624	NA	LysR family transcriptional regulator, flagellar master operon regulator	K12420	0.0035309	M00778	ketoreductase [EC:1.1.1.-]
K12372	0.026228	NA	dipeptide transport system ATP-binding protein	K23463	0.00352933	NA	(Z)-2-((N-methylformamido)methylene)-5-hydroxybutyrolactone dehydrogenase [EC:1.2.1.-]
K01423	0.0262269	NA	beta-barrel assembly-enhancing protease [EC:3.4.-.-]	K18902	0.00352581	M00698	multidrug efflux pump
K08348	0.0262172	NA	formate dehydrogenase-N, alpha subunit [EC:1.17.5.3]	K10212	0.00352485	NA	glycosyl-4,4'-diaponeurosporenoate acyltransferase [EC:2.3.1.-]
K22130	0.0262168	NA	3-dehydro-4-phosphotetronate decarboxylase [EC:4.1.1.104]	K07813	0.00351467	NA	accessory gene regulator B
K19688	0.0262166	NA	biofilm regulator BssR	K09965	0.00351079	NA	uncharacterized protein
K07387	0.0262158	NA	metalloprotease [EC:3.4.24.-]	K10816	0.00350897	NA	hydrogen cyanide synthase HcnC [EC:1.4.99.5]
K03837	0.0262126	NA	serine transporter	K18300	0.00350719	M00641	outer membrane protein, multidrug efflux system
K01671	0.0261906	NA	sulfofructosephosphate aldolase [EC:4.1.2.57]	K00320	0.00350678	NA	5,10-methylenetetrahydromethanopterin reductase [EC:1.5.98.2]
K03676	0.0261623	NA	glutaredoxin 3	K10554	0.00350259	NA	fructose transport system ATP-binding protein
K07358	0.0261384	NA	type 1 fimbriae regulatory protein FimE	K02706	0.00350244	M00161	photosystem II P680 reaction center D2 protein [EC:1.10.3.9]
K03607	0.0261279	NA	ProP effector	K18299	0.0035005	M00641	multidrug efflux pump
K11901	0.0261069	NA	type VI secretion system protein ImpB	K15861	0.00349072	NA	CRP/FNR family transcriptional regulator, nitrogen fixation regulation protein
K04087	0.0261003	NA	modulator of FtsH protease HflC	K19418	0.0034892	NA	membrane protein EpsK
K22477	0.0260912	M00028	N-acetylglutamate synthase [EC:2.3.1.1]	K19344	0.00348787	NA	cytochrome c55X
K10555	0.0260352	NA	AI-2 transport system substrate-binding protein	K06432	0.00348474	NA	small acid-soluble spore protein O (minor)
K06177	0.0260176	NA	tRNA pseudouridine32 synthase / 23S rRNA pseudouridine746 synthase [EC:5.4.99.28 5.4.99.29]	K02708	0.00346527	M00161	photosystem II cytochrome b559 subunit beta
K03221	0.0260098	NA	type III secretion protein F	K08724	0.00346158	NA	penicillin-binding protein 2B
K04022	0.0260021	NA	alcohol dehydrogenase	K12270	0.00346105	NA	accessory secretory protein Asp3
K07637	0.0259796	NA	two-component system, OmpR family, sensor histidine kinase PhoQ [EC:2.7.13.3]	K08976	0.00345614	NA	putative membrane protein
K02390	0.0259357	NA	flagellar hook protein FlgE	K09128	0.00343903	NA	uncharacterized protein
K03772	0.0259155	NA	FKBP-type peptidyl-prolyl cis-trans isomerase FkpA [EC:5.2.1.8]	K09685	0.0034367	NA	purine operon repressor
K05786	0.0258802	NA	chloramphenicol-sensitive protein RarD	K13853	0.00343397	NA	3-deoxy-7-phosphoheptulonate synthase / chorismate mutase [EC:2.5.1.54 5.4.99.5]
K07690	0.0258612	NA	two-component system, NarL family, response regulator EvgA	K10232	0.003426	NA	alpha-glucoside transport system substrate-binding protein
K03414	0.0258527	NA	chemotaxis protein CheZ	K10810	0.00342314	M00895	thiazole tautomerase (transcriptional regulator TenI) [EC:5.3.99.10]
K07783	0.0258316	NA	MFS transporter, OPA family, sugar phosphate sensor protein UhpC	K06209	0.00341526	NA	chorismate mutase [EC:5.4.99.5]
K03214	0.025822	NA	RNA methyltransferase, TrmH family [EC:2.1.1.-]	K22737	0.00341284	NA	erythrin-vacuolar iron transport family protein
K02549	0.0257767	M00116	O-succinylbenzoate synthase [EC:4.2.1.113]	K07183	0.00341263	NA	two-component system, response regulator / RNA-binding antiterminator
K08159	0.0257766	NA	MFS transporter, DHA1 family, L-arabinose/isopropyl-beta-D-thiogalactopyranoside export protein	K21135	0.0034074	NA	membrane fusion protein, multidrug efflux system
K04334	0.0257472	NA	major curlin subunit	K05822	0.00340644	M00525	tetrahydrodipicolinate N-acetyltransferase [EC:2.3.1.89]
K19803	0.0257449	NA	Kdo2-lipid A phosphotransferase [EC:2.7.4.29]	K16081	0.00339992	NA	alginate production protein
K09914	0.0257439	NA	putative lipoprotein	K06412	0.00339271	NA	stage V sporulation protein G
K06048	0.0256608	NA	glutamate---cysteine ligase / carboxylate-amine ligase [EC:6.3.2.2 6.3.-.-]	K08600	0.00338978	NA	sortase B [EC:3.4.22.71]
K09895	0.0256503	NA	uncharacterized protein	K11622	0.00338956	NA	lia operon protein LiaF
K05365	0.025645	NA	penicillin-binding protein 1B [EC:2.4.1.129 3.4.16.4]	K06596	0.00338869	NA	chemosensory pili system protein ChpA (sensor histidine kinase/response regulator)
K06918	0.0256155	NA	uncharacterized protein	K06430	0.00338758	NA	small acid-soluble spore protein M (minor)
K02560	0.0255991	M00060	lauroyl-Kdo2-lipid IVA myristoyltransferase [EC:2.3.1.243]	K18235	0.00338613	NA	virginiamycin B lyase [EC:4.2.99.-]
K09787	0.0255732	NA	uncharacterized protein	K07652	0.00338401	NA	two-component system, OmpR family, sensor histidine kinase VicK [EC:2.7.13.3]
K05816	0.0255682	NA	sn-glycerol 3-phosphate transport system ATP-binding protein [EC:7.6.2.10]	K21832	0.00336959	NA	glycine betaine catabolism B
K03592	0.0255666	NA	PmbA protein	K23244	0.00336911	NA	D-apiose dehydrogenase [EC:1.1.1.420]
K11183	0.0255454	NA	multiphosphoryl transfer protein [EC:2.7.1.202]	K20608	0.00335732	NA	tetrahedral aminopeptidase [EC:3.4.11.-]
K09970	0.0255418	NA	general L-amino acid transport system permease protein	K16925	0.00334652	NA	energy-coupling factor transport system substrate-specific component
K09900	0.0254718	NA	N4-acetylcytidine amidohydrolase [EC:3.5.1.135]	K21911	0.00334346	NA	D-erythrulose 4-phosphate isomerase [EC:5.3.1.34]
K19123	0.0254708	NA	CRISPR system Cascade subunit CasA	K05888	0.00334257	NA	L-gulono-1,4-lactone dehydrogenase [EC:1.1.2.-]
K04021	0.0254341	NA	aldehyde dehydrogenase	K04076	0.00333214	NA	ATP-dependent Lon protease [EC:3.4.21.53]
K00325	0.0254074	NA	H+-translocating NAD(P) transhydrogenase subunit beta [EC:1.6.1.2 7.1.1.1]	K06285	0.0033303	NA	transcription attenuation protein (tryptophan RNA-binding attenuator protein)
K02200	0.0253941	NA	cytochrome c-type biogenesis protein CcmH	K06426	0.00332685	NA	small acid-soluble spore protein I (minor)
K19125	0.025388	NA	CRISPR system Cascade subunit CasD	K16566	0.00332411	NA	exopolysaccharide production protein ExoY
K12972	0.0253778	NA	glyoxylate/hydroxypyruvate reductase [EC:1.1.1.79 1.1.1.81]	K14335	0.00332386	NA	alpha-1,6-mannosyltransferase [EC:2.4.1.-]
K02855	0.0253584	NA	AraC family transcriptional regulator, L-rhamnose operon regulatory protein RhaS	K03888	0.00331964	NA	menaquinol-cytochrome c reductase cytochrome b/c subunit
K02194	0.0253447	NA	heme exporter protein B	K11693	0.00331095	NA	peptidoglycan pentaglycine glycine transferase (the first glycine) [EC:2.3.2.16]
K03597	0.0253329	NA	sigma-E factor negative regulatory protein RseA	K20976	0.00330004	NA	histidine phosphotransfer protein HptB
K00322	0.0253321	NA	NAD(P) transhydrogenase [EC:1.6.1.1]	K06359	0.00329865	NA	response regulator aspartate phosphatase A (stage 0 sporulation protein L) [EC:3.1.-.-]
K02401	0.0253249	NA	flagellar biosynthetic protein FlhB	K15521	0.00329714	NA	D-inositol-3-phosphate glycosyltransferase [EC:2.4.1.250]
K18997	0.0252827	NA	chaperone modulatory protein CbpM	K08258	0.00329464	NA	staphopain A [EC:3.4.22.48]
K00113	0.0252795	NA	glycerol-3-phosphate dehydrogenase subunit C	K22217	0.00329246	NA	sugar lactone lactonase
K09472	0.0252517	NA	4-(gamma-glutamylamino)butanal dehydrogenase [EC:1.2.1.99]	K02248	0.00329124	NA	competence protein ComGF
K02558	0.0252439	NA	UDP-N-acetylmuramate: L-alanyl-gamma-D-glutamyl-meso-diaminopimelate ligase [EC:6.3.2.45]	K18473	0.00328964	NA	acetoacetyl-[acyl-carrier protein] synthase [EC:2.3.1.180]
K15523	0.025243	NA	protein-ribulosamine 3-kinase [EC:2.7.1.172]	K22622	0.00328717	M00595	S-disulfanyl-L-cysteine oxidoreductase SoxD [EC:1.8.2.6]
K07685	0.025233	NA	two-component system, NarL family, nitrate/nitrite response regulator NarP	K13592	0.00328537	NA	regulator of CtrA degradation
K02794	0.0252315	NA	mannose PTS system EIIAB component [EC:2.7.1.191]	K10553	0.00327754	NA	fructose transport system permease protein
K07039	0.0252136	NA	uncharacterized protein	K23448	0.00327498	NA	MFS transporter, DHA1 family, staphyloferrin A biosynthesis exporter
K06080	0.0252136	NA	RcsF protein	K04782	0.00327301	NA	isochorismate pyruvate lyase [EC:4.2.99.21]
K01770	0.025192	M00096	2-C-methyl-D-erythritol 2,4-cyclodiphosphate synthase [EC:4.6.1.12]	K19291	0.00327234	NA	mannuronan synthase [EC:2.4.1.33]
K03708	0.0251747	NA	transcriptional regulator of stress and heat shock response	K00805	0.00327018	NA	heptaprenyl diphosphate synthase [EC:2.5.1.30]
K07305	0.025149	NA	peptide-methionine (R)-S-oxide reductase [EC:1.8.4.12]	K12547	0.00326479	NA	polysaccharidase protein
K18657	0.0251478	NA	cell division protein ZapC	K13061	0.00326349	NA	acyl homoserine lactone synthase [EC:2.3.1.184]
K09982	0.0251412	NA	uncharacterized protein	K22209	0.00326051	NA	D(-)-tartrate dehydratase [EC:4.2.1.81]
K11940	0.0251345	NA	heat shock protein HspQ	K06350	0.00325446	NA	antagonist of KipI
K13821	0.0251213	NA	RHH-type transcriptional regulator, proline utilization regulon repressor / proline dehydrogenase / delta 1-pyrroline-5-carboxylate dehydrogenase [EC:1.5.5.2 1.2.1.88]	K24042	0.00325437	NA	methionine synthase / methylenetetrahydrofolate reductase(NADPH) [EC:2.1.1.13 1.5.1.20]
K04025	0.0250792	NA	ethanolamine utilization protein EutK	K07682	0.00324312	NA	two-component system, NarL family, sensor histidine kinase DevS [EC:2.7.13.3]
K03548	0.0250763	NA	putative permease	K10023	0.00324232	NA	arginine/ornithine transport system permease protein
K03181	0.0250753	M00117	chorismate--pyruvate lyase [EC:4.1.3.40]	K02658	0.00324005	NA	twitching motility two-component system response regulator PilH
K01766	0.0250689	NA	cysteine sulfinate desulfinase [EC:4.4.1.-]	K23127	0.00323605	NA	cyclic-di-GMP-binding protein
K00956	0.0249882	M00176	sulfate adenylyltransferase subunit 1 [EC:2.7.7.4]	K06408	0.00323512	NA	stage V sporulation protein AF
K11906	0.024981	NA	type VI secretion system protein VasD	K23842	0.00323225	NA	NAD(P)H dehydrogenase (quinone) [EC:1.6.5.2]
K02553	0.0249788	NA	regulator of ribonuclease activity A	K02245	0.0032308	NA	competence protein ComGC
K19000	0.024936	NA	Rho-binding antiterminator	K21465	0.00322958	NA	penicillin-binding protein A
K01792	0.0249183	NA	glucose-6-phosphate 1-epimerase [EC:5.1.3.15]	K06019	0.00321506	NA	pyrophosphatase PpaX [EC:3.6.1.1]
K20541	0.0249114	NA	cellulose synthase operon protein B	K22135	0.00320371	NA	N-acetylglucosamine malate deacetylase 2 [EC:3.5.1.-]
K02045	0.0249114	NA	sulfate/thiosulfate transport system ATP-binding protein [EC:7.3.2.3]	K15783	0.00320349	NA	ectoine hydrolase [EC:3.5.4.44]
K11607	0.0249004	NA	manganese/iron transport system ATP-binding protein	K20469	0.00320318	NA	putative heme transporter
K08310	0.0248982	M00126	dihydroneopterin triphosphate diphosphatase [EC:3.6.1.67]	K22215	0.00319874	NA	galactose dehydrogenase [EC:1.1.1.48 1.1.1.120]
K12519	0.0248709	NA	chaperone protein PapD	K05583	0.00319492	NA	NAD(P)H-quinone oxidoreductase subunit L [EC:7.1.1.2]
K04761	0.0248403	NA	LysR family transcriptional regulator, hydrogen peroxide-inducible genes activator	K17229	0.00319093	NA	sulfide dehydrogenase [flavocytochrome c] flavoprotein chain [EC:1.8.2.3]
K07703	0.0248358	NA	two-component system, CitB family, response regulator DcuR	K09776	0.0031869	NA	uncharacterized protein
K11738	0.0247996	NA	L-asparagine permease	K13671	0.0031853	NA	alpha-1,2-mannosyltransferase [EC:2.4.1.-]
K11250	0.0247886	NA	leucine efflux protein	K13584	0.00317787	NA	two-component system, cell cycle response regulator CtrA
K06079	0.0247676	NA	copper homeostasis protein (lipoprotein)	K20972	0.00317675	NA	two-component system, sensor histidine kinase RetS
K03619	0.0247613	NA	hydrogenase-1 operon protein HyaE	K05972	0.00317605	NA	acetylxylan esterase [EC:3.1.1.72]
K03426	0.0247417	NA	NAD+ diphosphatase [EC:3.6.1.22]	K09987	0.00317082	NA	uncharacterized protein
K08297	0.0247195	NA	crotonobetainyl-CoA dehydrogenase [EC:1.3.8.13]	K03382	0.00316664	NA	hydroxydechloroatrazine ethylaminohydrolase [EC:3.5.4.43]
K05803	0.0247186	NA	lipoprotein NlpI	K19696	0.00316484	NA	5'-methylthioinosine phosphorylase [EC:2.4.2.44]
K02623	0.0247126	NA	LysR family transcriptional regulator, pca operon transcriptional activator	K03396	0.00316462	NA	S-(hydroxymethyl)glutathione synthase [EC:4.4.1.22]
K03643	0.0247122	NA	LPS-assembly lipoprotein	K01400	0.00316179	NA	bacillolysin [EC:3.4.24.28]
K06894	0.0247081	NA	alpha-2-macroglobulin	K02479	0.00316014	NA	two-component system, NarL family, response regulator
K06966	0.0246905	NA	pyrimidine/purine-5'-nucleotide nucleosidase [EC:3.2.2.10 3.2.2.-]	K08985	0.00315628	NA	putative lipoprotein
K00879	0.0246452	NA	L-fuculokinase [EC:2.7.1.51]	K12988	0.00315171	NA	alpha-1,3-rhamnosyltransferase [EC:2.4.1.-]
K15256	0.0246139	NA	tRNA (cmo5U34)-methyltransferase [EC:2.1.1.-]	K00260	0.00315092	NA	glutamate dehydrogenase [EC:1.4.1.2]
K10762	0.0246116	NA	putative replication protein	K11631	0.0031497	NA	bacitracin transport system ATP-binding protein
K00990	0.0246074	NA	[protein-PII] uridylyltransferase [EC:2.7.7.59]	K19296	0.00314883	NA	alginate O-acetyltransferase complex protein AlgF
K06447	0.0245966	NA	succinylglutamic semialdehyde dehydrogenase [EC:1.2.1.71]	K07009	0.00314873	NA	lipid II isoglutaminyl synthase (glutamine-hydrolysing) [EC:6.3.5.13]
K11076	0.0245904	NA	putrescine transport system ATP-binding protein	K22551	0.00314788	NA	N-methyl-L-proline demethylase [EC:1.5.3.-]
K01093	0.0245742	NA	4-phytase / acid phosphatase [EC:3.1.3.26 3.1.3.2]	K13778	0.00314502	NA	geranyl-CoA carboxylase beta subunit [EC:6.4.1.5]
K07343	0.0245202	NA	DNA transformation protein and related proteins	K14658	0.00314381	NA	nodulation protein A [EC:2.3.1.-]
K07283	0.0245085	NA	putative salt-induced outer membrane protein	K21935	0.0031384	NA	beta-lysine N6-acetyltransferase [EC:2.3.1.264]
K03775	0.0245021	NA	FKBP-type peptidyl-prolyl cis-trans isomerase SlyD [EC:5.2.1.8]	K13530	0.00312557	NA	AraC family transcriptional regulator, regulatory protein of adaptative response / methylphosphotriester-DNA alkyltransferase methyltransferase [EC:2.1.1.-]
K22041	0.0244967	NA	TetR/AcrR family transcriptional regulator, copper-responsive repressor	K11026	0.00312381	M00574	pertussis toxin subunit 4
K22110	0.024477	NA	oligogalacturonate-specific porin family protein	K21004	0.00311767	NA	polysaccharide biosynthesis protein PslK
K22509	0.024469	NA	type III secretion system export apparatus protein	K21830	0.00311246	NA	phosphorylcholine phosphatase
K07337	0.0244624	NA	penicillin-binding protein activator	K21701	0.00311019	NA	AraC family transcriptional regulator, transcriptional activator for feuABC-ybbA operon
K14682	0.0244433	M00028	amino-acid N-acetyltransferase [EC:2.3.1.1]	K10235	0.00310993	NA	alpha-glucoside transport system ATP-binding protein
K23163	0.024426	NA	sulfate/thiosulfate transport system substrate-binding protein	K17472	0.00310798	NA	Rrf2 family transcriptional regulator, cysteine metabolism repressor
K13256	0.024425	NA	protein PsiE	K21461	0.0031049	NA	poly-beta-1,6-N-acetyl-D-glucosamine synthesis protein
K04044	0.0244179	NA	molecular chaperone HscA	K13786	0.00310448	NA	cob(II)yrinic acid a,c-diamide reductase [EC:1.16.8.-]
K03923	0.0244175	NA	NADPH dehydrogenase (quinone) [EC:1.6.5.10]	K01308	0.00310123	NA	g-D-glutamyl-meso-diaminopimelate peptidase [EC:3.4.19.11]
K17247	0.0244095	NA	methionine sulfoxide reductase heme-binding subunit	K06301	0.00309923	NA	spore germination protein PC
K06179	0.0243676	NA	23S rRNA pseudouridine955/2504/2580 synthase [EC:5.4.99.24]	K18546	0.00309627	NA	streptogrisin C [EC:3.4.21.-]
K03774	0.0243586	NA	FKBP-type peptidyl-prolyl cis-trans isomerase SlpA [EC:5.2.1.8]	K19285	0.00309474	NA	FMN reductase (NADPH) [EC:1.5.1.38]
K04477	0.0243505	NA	putative hydrolase	K09692	0.00309037	NA	teichoic acid transport system permease protein
K12149	0.0243232	NA	DNA-damage-inducible protein I	K11144	0.00308886	NA	primosomal protein DnaI
K12290	0.024305	NA	pilus assembly protein HofO	K06208	0.00308785	NA	chorismate mutase [EC:5.4.99.5]
K07261	0.0242902	NA	penicillin-insensitive murein DD-endopeptidase [EC:3.4.24.-]	K16323	0.0030842	NA	purine nucleoside transport protein
K07323	0.0242648	NA	phospholipid transport system substrate-binding protein	K09991	0.00308015	NA	uncharacterized protein
K10985	0.0242376	NA	galactosamine PTS system EIIC component	K18981	0.00307781	NA	uronate dehydrogenase [EC:1.1.1.203]
K05815	0.0242082	NA	sn-glycerol 3-phosphate transport system permease protein	K07723	0.00307668	NA	CopG family transcriptional regulator / antitoxin EndoAI
K08318	0.024203	NA	4-hydroxybutyrate dehydrogenase / sulfolactaldehyde 3-reductase [EC:1.1.1.61 1.1.1.373]	K19080	0.00307634	M00730	cationic antimicrobial peptide transport system permease protein
K11941	0.0242023	NA	glucans biosynthesis protein C [EC:2.1.-.-]	K13588	0.00307498	NA	histidine phosphotransferase ChpT
K11911	0.0241733	NA	type VI secretion system protein VasL	K02659	0.00307439	NA	twitching motility protein PilI
K03969	0.0241703	NA	phage shock protein A	K02086	0.00307313	NA	DNA replication protein
K02598	0.0241647	NA	nitrite transporter	K18308	0.00307075	NA	outer membrane protein, multidrug efflux system
K09933	0.0241549	NA	MtfA peptidase	K10565	0.00306961	NA	chemotaxis protein MotD
K10806	0.0241515	NA	acyl-CoA thioesterase YciA [EC:3.1.2.-]	K21960	0.00306766	NA	LysR family transcriptional regulator, regulator of the ytmI operon
K21084	0.0241436	NA	diguanylate cyclase [EC:2.7.7.65]	K16706	0.00306755	NA	teichuronic acid biosynthesis protein TuaF
K01525	0.0241396	NA	bis(5'-nucleosyl)-tetraphosphatase (symmetrical) [EC:3.6.1.41]	K23586	0.0030664	NA	superantigen-like protein 7
K01169	0.0241382	NA	ribonuclease I (enterobacter ribonuclease) [EC:4.6.1.21]	K00756	0.00306363	NA	pyrimidine-nucleoside phosphorylase [EC:2.4.2.2]
K10001	0.0241223	NA	glutamate/aspartate transport system substrate-binding protein	K09763	0.00305898	NA	uncharacterized protein
K19148	0.0241219	NA	small toxic protein TisB	K15785	0.00305538	NA	L-2,4-diaminobutyrate transaminase [EC:2.6.1.76]
K03117	0.0241079	NA	sec-independent protein translocase protein TatB	K11617	0.00305235	NA	two-component system, NarL family, sensor histidine kinase LiaS [EC:2.7.13.3]
K03712	0.0240923	NA	MarR family transcriptional regulator, multiple antibiotic resistance protein MarR	K20940	0.00305113	NA	5-methylphenazine-1-carboxylate 1-monooxygenase [EC:1.14.13.218]
K07443	0.0240822	NA	methylated-DNA-protein-cysteine methyltransferase related protein	K14956	0.00304568	NA	6 kDa early secretory antigenic target
K00673	0.0240699	NA	arginine N-succinyltransferase [EC:2.3.1.109]	K18072	0.00304299	M00745	two-component system, OmpR family, sensor kinase ParS [EC:2.7.13.3]
K22105	0.0240689	NA	TetR/AcrR family transcriptional regulator, fatty acid biosynthesis regulator	K08372	0.00303918	NA	putative serine protease PepD [EC:3.4.21.-]
K21963	0.024063	NA	LuxR family transcriptional regulator, Mat/Ecp fimbriae transcriptional regulator	K14197	0.00303309	NA	immunoglobulin G-binding protein Sbi
K02856	0.0240235	NA	L-rhamnose-H+ transport protein	K19417	0.00302884	NA	HTH-type transcriptional regulator, biofilm formation regulator
K10709	0.0240156	NA	fructoselysine 3-epimerase [EC:5.1.3.41]	K02711	0.00302709	NA	photosystem II PsbJ protein
K09978	0.024005	NA	uncharacterized protein	K21833	0.00302273	NA	dimethylglycine catabolism A
K03720	0.0239774	NA	TrpR family transcriptional regulator, trp operon repressor	K15654	0.00302235	NA	surfactin family lipopeptide synthetase A
K02444	0.0239686	NA	DeoR family transcriptional regulator, glycerol-3-phosphate regulon repressor	K00695	0.00302085	NA	sucrose synthase [EC:2.4.1.13]
K03764	0.0239504	NA	MetJ family transcriptional regulator, methionine regulon repressor	K09190	0.00301728	NA	uncharacterized protein
K02197	0.0239438	NA	cytochrome c-type biogenesis protein CcmE	K06332	0.00301411	NA	spore coat protein JA
K04080	0.0239391	NA	molecular chaperone IbpA	K21902	0.00301094	NA	MerR family transcriptional regulator, repressor of the yfmOP operon
K07659	0.0239097	NA	two-component system, OmpR family, phosphate regulon response regulator OmpR	K20118	0.00300834	NA	glucose PTS system EIICBA or EIICB component [EC:2.7.1.199]
K03808	0.0238891	NA	paraquat-inducible protein A	K09977	0.00300796	NA	uncharacterized protein
K07274	0.0238872	NA	MipA family protein	K11333	0.00299915	NA	3,8-divinyl chlorophyllide a/chlorophyllide a reductase subunit X [EC:1.3.7.14 1.3.7.15]
K03641	0.0238802	NA	TolB protein	K13582	0.00299001	NA	localization factor PodJL
K08276	0.0238776	NA	ecotin	K03727	0.00298099	NA	ATP-dependent RNA helicase HelY [EC:3.6.4.-]
K03185	0.023871	M00117	2-octaprenyl-6-methoxyphenol hydroxylase [EC:1.14.13.-]	K07571	0.00297776	NA	S1 RNA binding domain protein
K00281	0.0238427	NA	glycine dehydrogenase [EC:1.4.4.2]	K11638	0.00297409	NA	two-component system, CitB family, response regulator CitT
K07584	0.0238204	NA	uncharacterized protein	K07117	0.00297386	NA	uncharacterized protein
K13894	0.0238163	NA	microcin C transport system permease protein	K12241	0.00297324	NA	pyochelin biosynthetic protein PchG
K10538	0.02378	NA	L-arabinose transport system permease protein	K07570	0.0029694	NA	general stress protein 13
K08227	0.023764	NA	MFS transporter, LPLT family, lysophospholipid transporter	K06118	0.00296825	NA	UDP-sulfoquinovose synthase [EC:3.13.1.1]
K01042	0.0237511	NA	L-seryl-tRNA(Ser) seleniumtransferase [EC:2.9.1.1]	K11637	0.00296176	NA	two-component system, CitB family, sensor histidine kinase CitS [EC:2.7.13.3]
K08218	0.0237277	NA	MFS transporter, PAT family, beta-lactamase induction signal transducer AmpG	K01217	0.00295624	NA	L-iduronidase [EC:3.2.1.76]
K12582	0.0237226	NA	dTDP-N-acetylfucosamine:lipid II N-acetylfucosaminyltransferase [EC:2.4.1.325]	K02698	0.00294942	NA	photosystem I subunit X
K06192	0.0237126	NA	paraquat-inducible protein B	K01416	0.00294462	NA	snapalysin [EC:3.4.24.77]
K08315	0.0237011	NA	hydrogenase 3 maturation protease [EC:3.4.23.51]	K22935	0.00294249	NA	D-ribulokinase [EC:2.7.1.47]
K21906	0.0236998	NA	AraC family transcriptional regulator, glutamate-dependent acid resistance regulator	K14647	0.00294005	NA	minor extracellular serine protease Vpr [EC:3.4.21.-]
K21973	0.0236851	NA	blue light- and temperature-responsive anti-repressor	K18162	0.00293837	NA	NADH dehydrogenase [ubiquinone] 1 alpha subcomplex assembly factor 5 [EC:2.1.1.-]
K06163	0.0236676	NA	alpha-D-ribose 1-methylphosphonate 5-phosphate C-P lyase [EC:4.7.1.1]	K12503	0.00293612	NA	short-chain Z-isoprenyl diphosphate synthase [EC:2.5.1.68]
K11750	0.0236589	NA	esterase FrsA [EC:3.1.-.-]	K14743	0.002928	NA	membrane-anchored mycosin MYCP [EC:3.4.21.-]
K07647	0.0235727	NA	two-component system, OmpR family, sensor histidine kinase TorS [EC:2.7.13.3]	K00837	0.00292267	NA	aromatic aminotransferase [EC:2.6.1.-]
K07245	0.0235587	NA	copper resistance protein D	K11078	0.00292191	NA	mannopine transport system permease protein
K11719	0.0235506	NA	lipopolysaccharide export system protein LptC	K01003	0.00292036	NA	oxaloacetate decarboxylase [EC:4.1.1.112]
K04015	0.0235433	NA	protein NrfD	K06302	0.00291992	NA	spore germination protein PD
K01002	0.0235429	NA	phosphoglycerol transferase [EC:2.7.8.20]	K07590	0.00291755	NA	large subunit ribosomal protein L7A
K18840	0.023541	NA	antitoxin GhoS	K18129	0.00291483	M00643	TetR/AcrR family transcriptional regulator, mexXY operon repressor
K13631	0.0235289	NA	AraC family transcriptional regulator, mar-sox-rob regulon activator	K06599	0.00291039	NA	AraC family transcriptional regulator, chemosensory pili system protein ChpD
K19789	0.0234962	NA	DNA repair protein RadD	K00220	0.00290727	NA	cyclohexadieny/prephenate dehydrogenase [EC:1.3.1.43 1.3.1.12]
K07782	0.0234675	NA	LuxR family transcriptional regulator, quorum-sensing system regulator SdiA	K13700	0.0028958	NA	abhydrolase domain-containing protein 6 [EC:3.1.1.23]
K00127	0.0234615	NA	formate dehydrogenase subunit gamma	K21909	0.00289323	NA	D-erythrulose 1-phosphate 3-epimerase [EC:5.1.3.38]
K02361	0.0234537	NA	isochorismate synthase [EC:5.4.4.2]	K18925	0.00289076	NA	paired small multidrug resistance pump
K03468	0.0234482	NA	p-hydroxybenzoic acid efflux pump subunit AaeB	K06403	0.0028906	NA	stage V sporulation protein AA
K07799	0.0234384	NA	membrane fusion protein, multidrug efflux system	K06380	0.00287548	NA	stage II sporulation protein B
K11720	0.0234184	NA	lipopolysaccharide export system permease protein	K24017	0.00287489	NA	phosphoribosyl isomerase A [EC:5.3.1.16 5.3.1.24]
K08325	0.0234148	NA	NADP-dependent alcohol dehydrogenase [EC:1.1.-.-]	K14980	0.00287442	NA	two-component system, OmpR family, sensor histidine kinase ChvG [EC:2.7.13.3]
K02024	0.023401	NA	maltoporin	K02249	0.00287405	NA	competence protein ComGG
K02336	0.0233862	NA	DNA polymerase II [EC:2.7.7.7]	K06367	0.00287207	NA	response regulator aspartate phosphatase I [EC:3.1.-.-]
K03632	0.0233851	NA	chromosome partition protein MukB	K07668	0.00286245	NA	two-component system, OmpR family, response regulator VicR
K03722	0.0233848	NA	ATP-dependent DNA helicase DinG [EC:3.6.4.12]	K13580	0.00285004	NA	magnesium chelatase subunit ChlD-like protein
K03567	0.0233618	NA	glycine cleavage system transcriptional repressor	K07768	0.00284914	NA	two-component system, OmpR family, sensor histidine kinase SenX3 [EC:2.7.13.3]
K09857	0.0233481	NA	uncharacterized protein	K13486	0.00284863	NA	chemotaxis protein methyltransferase WspC
K15257	0.0233399	NA	tRNA (mo5U34)-methyltransferase [EC:2.1.1.-]	K08083	0.00284826	NA	two-component system, LytTR family, response regulator AlgR
K07673	0.0232371	NA	two-component system, NarL family, nitrate/nitrite sensor histidine kinase NarX [EC:2.7.13.3]	K02251	0.0028479	NA	competence protein ComQ
K01150	0.0232354	NA	deoxyribonuclease I [EC:3.1.21.1]	K19429	0.00284021	NA	acetyltransferase EpsM [EC:2.3.1.-]
K01665	0.0232174	NA	para-aminobenzoate synthetase component I [EC:2.6.1.85]	K11634	0.0028325	NA	two-component system, OmpR family, response regulator YxdJ
K00230	0.023214	M00121	menaquinone-dependent protoporphyrinogen oxidase [EC:1.3.5.3]	K05580	0.00282984	NA	NAD(P)H-quinone oxidoreductase subunit I [EC:7.1.1.2]
K03749	0.0231916	NA	DedD protein	K19232	0.00282848	NA	hyaluronate-binding autotransporter adhesin
K19270	0.0231706	NA	mannitol-1-/sugar-/sorbitol-6-phosphatase [EC:3.1.3.22 3.1.3.23 3.1.3.50]	K12084	0.00282524	NA	type IV secretion system protein PtlD
K13288	0.0231635	NA	oligoribonuclease [EC:3.1.-.-]	K13489	0.00282196	NA	chemotaxis-related protein WspD
K09131	0.0231569	NA	uncharacterized protein	K12539	0.00281688	NA	ATP-binding cassette, subfamily C, bacterial PrsD
K02566	0.0231489	NA	NagD protein	K07692	0.00281475	NA	two-component system, NarL family, response regulator DegU
K00867	0.0231295	NA	type I pantothenate kinase [EC:2.7.1.33]	K00066	0.00281204	NA	GDP-mannose 6-dehydrogenase [EC:1.1.1.132]
K09160	0.0231068	NA	uncharacterized protein	K07680	0.00280594	NA	two-component system, NarL family, sensor histidine kinase ComP [EC:2.7.13.3]
K15974	0.0231047	NA	MarR family transcriptional regulator, negative regulator of the multidrug operon emrRAB	K07800	0.00280268	NA	AgrD protein
K20862	0.0230811	M00125	FMN hydrolase / 5-amino-6-(5-phospho-D-ribitylamino)uracil phosphatase [EC:3.1.3.102 3.1.3.104]	K11912	0.00280239	NA	serine/threonine-protein kinase PpkA [EC:2.7.11.1]
K03580	0.0230686	NA	ATP-dependent helicase HepA [EC:3.6.4.-]	K16886	0.00280232	NA	quinone-modifying oxidoreductase, subunit QmoB
K23243	0.0230674	NA	nickel/cobalt homeostasis protein	K23138	0.00280167	NA	cytochrome P450 family 109 [EC:1.14.-.-]
K00073	0.0230534	NA	ureidoglycolate dehydrogenase (NAD+) [EC:1.1.1.350]	K01342	0.00280108	NA	subtilisin [EC:3.4.21.62]
K11075	0.0230408	NA	putrescine transport system permease protein	K21167	0.00280006	M00824	enediyne biosynthesis protein E11
K11605	0.0230346	NA	manganese/iron transport system permease protein	K05588	0.00279976	NA	bidirectional [NiFe] hydrogenase diaphorase subunit [EC:7.1.1.2]
K03087	0.0230117	NA	RNA polymerase nonessential primary-like sigma factor	K13622	0.00279176	NA	S-adenosylmethionine-diacylglycerol 3-amino-3-carboxypropyl transferase
K15832	0.0229911	NA	formate hydrogenlyase subunit 7	K21001	0.00279139	NA	polysaccharide biosynthesis protein PslH
K01082	0.0229832	NA	3'(2'), 5'-bisphosphate nucleotidase [EC:3.1.3.7]	K21019	0.00279051	NA	diguanylate cyclase [EC:2.7.7.65]
K00228	0.0229764	M00121	coproporphyrinogen III oxidase [EC:1.3.3.3]	K17892	0.00278088	NA	ferredoxin-thioredoxin reductase catalytic chain [EC:1.8.7.2]
K12981	0.0229733	NA	KDO transferase III [EC:2.4.99.-]	K06298	0.00277404	NA	germination protein M
K01612	0.0229704	NA	vanillate/4-hydroxybenzoate decarboxylase subunit C [EC:4.1.1.- 4.1.1.61]	K02203	0.00276425	NA	phosphoserine / homoserine phosphotransferase [EC:3.1.3.3 2.7.1.39]
K03806	0.0229643	NA	N-acetyl-anhydromuramoyl-L-alanine amidase [EC:3.5.1.28]	K06117	0.00276263	NA	glycerol-1-phosphatase [EC:3.1.3.21]
K08163	0.0229559	NA	MFS transporter, DHA1 family, multidrug resistance protein	K07282	0.0027585	NA	gamma-polyglutamate biosynthesis protein CapA
K09974	0.0229499	NA	uncharacterized protein	K08721	0.0027479	NA	outer membrane protein, multidrug efflux system
K07235	0.0229493	NA	tRNA 2-thiouridine synthesizing protein D [EC:2.8.1.-]	K00524	0.00274643	NA	ribonucleotide reductase, class II [EC:1.17.4.1]
K16693	0.0229105	NA	enterobacterial common antigen flippase	K16163	0.00274379	NA	maleylpyruvate isomerase [EC:5.2.1.4]
K04088	0.0228936	NA	modulator of FtsH protease HflK	K21010	0.00274169	NA	polysaccharide biosynthesis protein PelE
K05812	0.0228787	NA	DTW domain-containing protein	K16794	0.00273026	NA	platelet-activating factor acetylhydrolase IB subunit alpha
K07771	0.0228682	NA	two-component system, OmpR family, response regulator BasR	K17236	0.00272632	NA	arabinosaccharide transport system permease protein
K21964	0.0228467	NA	Mat/Ecp fimbriae major subunit	K19427	0.00272416	NA	glycosyltransferase EpsJ [EC:2.4.-.-]
K02379	0.0228406	NA	FdhD protein	K21160	0.00272287	M00824	enediyne biosynthesis protein E2
K10678	0.0228262	NA	nitroreductase [EC:1.-.-.-]	K21468	0.00271939	NA	penicillin-binding protein 4B
K09894	0.0228225	NA	uncharacterized protein	K07654	0.00271915	NA	two-component system, OmpR family, sensor histidine kinase MtrB [EC:2.7.13.3]
K06175	0.0228188	NA	tRNA pseudouridine65 synthase [EC:5.4.99.26]	K21758	0.00271777	NA	benzoate transport porin
K03812	0.022813	NA	ribosome modulation factor	K06428	0.00270408	NA	small acid-soluble spore protein K (minor)
K19956	0.0228108	NA	L-sorbose 1-phosphate reductase [EC:1.1.1.-]	K07716	0.00270318	NA	two-component system, cell cycle sensor histidine kinase PleC [EC:2.7.13.3]
K09824	0.0227983	NA	uncharacterized protein	K08906	0.00270266	NA	cytochrome c6
K04024	0.0227857	NA	ethanolamine utilization protein EutJ	K17216	0.00270229	NA	cystathionine beta-synthase (O-acetyl-L-serine) [EC:2.5.1.134]
K01048	0.0227785	NA	lysophospholipase [EC:3.1.1.5]	K06425	0.00270141	NA	small acid-soluble spore protein H (minor)
K12145	0.022778	NA	hydrogenase-4 component J [EC:1.-.-.-]	K17736	0.00269654	NA	AraC family transcriptional regulator, carnitine catabolism transcriptional activator
K22720	0.0227743	NA	surface composition regulator	K17829	0.00269164	NA	crotonyl-CoA reductase [EC:1.3.1.86]
K02386	0.0227736	NA	flagella basal body P-ring formation protein FlgA	K15864	0.00268618	M00529	nitrite reductase (NO-forming) / hydroxylamine reductase [EC:1.7.2.1 1.7.99.1]
K10000	0.0227634	NA	arginine transport system ATP-binding protein [EC:7.4.2.1]	K07978	0.00268469	NA	GntR family transcriptional regulator
K07710	0.0227601	NA	two-component system, NtrC family, sensor histidine kinase AtoS [EC:2.7.13.3]	K19082	0.00268252	NA	two-component system, OmpR family, response regulator protein BraR/BceR
K08485	0.0227574	NA	phosphocarrier protein NPr	K20997	0.00268011	NA	polysaccharide biosynthesis protein PslA
K06166	0.0227268	NA	alpha-D-ribose 1-methylphosphonate 5-triphosphate synthase subunit PhnG [EC:2.7.8.37]	K15663	0.00267585	NA	iturin family lipopeptide synthetase C
K03838	0.0227096	NA	threonine transporter	K06327	0.00267432	NA	spore coat protein D
K00324	0.0227096	NA	H+-translocating NAD(P) transhydrogenase subunit alpha [EC:1.6.1.2 7.1.1.1]	K20486	0.00267403	NA	lantibiotic leader peptide-processing serine protease [EC:3.4.21.-]
K09780	0.0227027	NA	uncharacterized protein	K17234	0.00267315	NA	arabinosaccharide transport system substrate-binding protein
K19168	0.0226841	NA	toxin CptA	K03095	0.00267259	NA	SprT-like protein
K03516	0.0226802	NA	flagellar protein FlhE	K18115	0.00266115	NA	sporulenol synthase [EC:4.2.1.137]
K03603	0.0226773	NA	GntR family transcriptional regulator, negative regulator for fad regulon and positive regulator of fabA	K02246	0.00265686	NA	competence protein ComGD
K05838	0.0226657	NA	putative thioredoxin	K21466	0.00265579	NA	penicillin-binding protein H
K03113	0.0226507	NA	translation initiation factor 1	K09695	0.00265167	NA	lipooligosaccharide transport system ATP-binding protein
K01818	0.022602	NA	L-fucose/D-arabinose isomerase [EC:5.3.1.25 5.3.1.3]	K16924	0.0026489	NA	energy-coupling factor transport system substrate-specific component
K01557	0.0225885	NA	acylpyruvate hydrolase [EC:3.7.1.5]	K01073	0.00264477	NA	acyl-CoA hydrolase [EC:3.1.2.20]
K03487	0.0225831	NA	LacI family transcriptional regulator, asc operon repressor	K16593	0.0026366	NA	pimeloyl-[acyl-carrier protein] synthase [EC:1.14.14.46]
K06214	0.0225791	NA	curli production assembly/transport component CsgG	K22580	0.00263588	NA	teichoic acid D-alanine hydrolase [EC:3.1.1.103]
K08161	0.0225628	NA	MFS transporter, DHA1 family, multidrug resistance protein	K00366	0.00263509	M00531	ferredoxin-nitrite reductase [EC:1.7.7.1]
K14414	0.0225578	NA	transcriptional regulatory protein RtcR	K20978	0.0026341	NA	HptB-dependent secretion and biofilm anti anti-sigma factor
K13893	0.0225513	NA	microcin C transport system substrate-binding protein	K11632	0.00263337	NA	bacitracin transport system permease protein
K07664	0.0224742	NA	two-component system, OmpR family, response regulator BaeR	K14661	0.00261935	NA	nodulation protein F [EC:2.3.1.-]
K07812	0.0224735	NA	trimethylamine-N-oxide reductase (cytochrome c) [EC:1.7.2.3]	K19419	0.00261922	NA	transmembrane protein EpsG
K12141	0.0224635	NA	hydrogenase-4 component F [EC:1.-.-.-]	K22343	0.0026102	NA	dimethylamine monooxygenase subunit B [EC:1.14.13.238]
K02043	0.0224526	NA	GntR family transcriptional regulator, phosphonate transport system regulatory protein	K17462	0.0026074	NA	putative AdoMet-dependent methyltransferase [EC:2.1.1.-]
K02806	0.0224483	NA	nitrogen PTS system EIIA component [EC:2.7.1.-]	K17324	0.00260299	NA	glycerol transport system ATP-binding protein
K07657	0.022439	NA	two-component system, OmpR family, phosphate regulon response regulator PhoB	K16254	0.0026011	NA	mxaJ protein
K06205	0.0224356	NA	MioC protein	K01994	0.00259052	NA	LuxR family transcriptional regulator, transcriptional regulator of spore coat protein
K06020	0.0224284	NA	energy-dependent translational throttle protein EttA	K21687	0.00258965	NA	resuscitation-promoting factor RpfA
K05396	0.0224237	NA	D-cysteine desulfhydrase [EC:4.4.1.15]	K21467	0.00258715	NA	penicillin-binding protein 3
K02391	0.0224236	NA	flagellar basal-body rod protein FlgF	K02705	0.00258601	M00161	photosystem II CP43 chlorophyll apoprotein
K08301	0.0223248	NA	ribonuclease G [EC:3.1.26.-]	K20039	0.00258426	NA	phenacrylate decarboxylase [EC:4.1.1.102]
K02195	0.0223158	NA	heme exporter protein C	K13772	0.00257743	NA	Rrf2 family transcriptional regulator, iron-responsive regulator
K09858	0.0222889	NA	SEC-C motif domain protein	K23776	0.00257234	NA	MerR family transcriptional regulator, global nitrogen regulator
K06176	0.0222507	NA	tRNA pseudouridine13 synthase [EC:5.4.99.27]	K20895	0.00256995	NA	formylaminopyrimidine deformylase [EC:3.5.1.-]
K03763	0.0222458	NA	DNA polymerase III subunit alpha, Gram-positive type [EC:2.7.7.7]	K06598	0.00256953	NA	chemosensory pili system protein ChpC
K10108	0.0222435	NA	maltose/maltodextrin transport system substrate-binding protein	K04050	0.00256643	NA	type III secretion protein E
K08324	0.0222435	NA	succinate-semialdehyde dehydrogenase [EC:1.2.1.16 1.2.1.24]	K02281	0.00256261	NA	pilus assembly protein CpaD
K19591	0.0222371	NA	MerR family transcriptional regulator, copper efflux regulator	K02788	0.00256202	NA	lactose PTS system EIICB component [EC:2.7.1.207]
K10831	0.0222173	NA	taurine transport system ATP-binding protein [EC:7.6.2.7]	K18941	0.00256101	NA	two-component system, OmpR family, response regulator ArlR
K04844	0.0222076	NA	hypothetical glycosyl hydrolase [EC:3.2.1.-]	K11777	0.00256026	NA	HAD superfamily phosphatase
K02446	0.0222051	M00003	fructose-1,6-bisphosphatase II [EC:3.1.3.11]	K02490	0.00255588	NA	two-component system, response regulator, stage 0 sporulation protein F
K09979	0.0221996	NA	uncharacterized protein	K01212	0.00255574	NA	levanase [EC:3.2.1.65]
K02617	0.022182	NA	phenylacetic acid degradation protein	K14338	0.00255068	NA	cytochrome P450 / NADPH-cytochrome P450 reductase [EC:1.14.14.1 1.6.2.4]
K13053	0.0221795	NA	cell division inhibitor SulA	K18294	0.00254756	NA	TetR/AcrR family transcriptional regulator, mexCD-oprJ operon repressor
K04045	0.0221782	NA	molecular chaperone HscC	K05297	0.00254582	NA	rubredoxin---NAD+ reductase [EC:1.18.1.1]
K12661	0.0221714	NA	L-rhamnonate dehydratase [EC:4.2.1.90]	K10229	0.0025439	NA	sorbitol/mannitol transport system permease protein
K01894	0.0221597	NA	glutamyl-Q tRNA(Asp) synthetase [EC:6.1.1.-]	K13572	0.00254159	NA	proteasome accessory factor B
K06219	0.0221161	NA	S-adenosylmethionine-dependent methyltransferase	K22320	0.00253847	NA	2-alkyl-3-oxoalkanoate reductase [EC:1.1.1.412]
K05776	0.0221005	NA	molybdate transport system ATP-binding protein	K13875	0.00253663	NA	L-arabonate dehydrase [EC:4.2.1.25]
K02423	0.0220587	NA	flagellar protein FliT	K19084	0.00252708	NA	bacitracin transport system permease protein
K07237	0.0220493	NA	tRNA 2-thiouridine synthesizing protein B	K09846	0.00252171	NA	demethylspheroidene O-methyltransferase [EC:2.1.1.210]
K10805	0.022047	NA	acyl-CoA thioesterase II [EC:3.1.2.-]	K14358	0.00251636	NA	secernin
K03771	0.0220341	NA	peptidyl-prolyl cis-trans isomerase SurA [EC:5.2.1.8]	K18540	0.00251469	NA	(R)-amidase [EC:3.5.1.100]
K05596	0.0220212	NA	LysR family transcriptional regulator, chromosome initiation inhibitor	K12540	0.00251352	NA	membrane fusion protein
K21746	0.0219988	NA	AraC family transcriptional regulator, reactive chlorine species (RCS)-specific activator of rcl operon	K06305	0.00250805	NA	spore germination protein Q
K03816	0.0219927	NA	xanthine phosphoribosyltransferase [EC:2.4.2.22]	K08082	0.0025022	NA	two-component system, LytTR family, sensor histidine kinase AlgZ [EC:2.7.13.3]
K02380	0.0219899	NA	FdhE protein	K06423	0.00249932	NA	small acid-soluble spore protein F (minor alpha/beta-type SASP)
K03290	0.021989	NA	MFS transporter, SHS family, sialic acid transporter	K11476	0.00249391	NA	GntR family transcriptional regulator, gluconate operon transcriptional repressor
K03528	0.0219581	NA	cell division protein ZipA	K06344	0.00248983	NA	spore coat protein Z
K06980	0.0219524	NA	tRNA-modifying protein YgfZ	K18935	0.00248267	NA	MFS transporter, DHA2 family, multidrug resistance protein
K11910	0.0219292	NA	type VI secretion system protein VasJ	K21613	0.00248265	NA	N-acetylcysteine deacetylase [EC:3.5.1.-]
K02193	0.0219092	NA	heme exporter protein A [EC:7.6.2.5]	K13063	0.0024808	NA	2-amino-4-deoxychorismate synthase [EC:2.6.1.86]
K05775	0.0219091	NA	maltose operon periplasmic protein	K23446	0.00247748	M00876	D-ornithine---citrate ligase [EC:6.3.2.58]
K02414	0.0219017	NA	flagellar hook-length control protein FliK	K13488	0.00247497	NA	chemotaxis-related protein WspB
K05709	0.0218983	NA	3-phenylpropionate/trans-cinnamate dioxygenase subunit beta [EC:1.14.12.19]	K19292	0.00247219	NA	alginate biosynthesis protein AlgK
K10003	0.0218698	NA	glutamate/aspartate transport system permease protein	K21561	0.0024686	NA	CRP/FNR family transcriptional regulator, global nitrogen regulator
K12136	0.0218297	NA	hydrogenase-4 component A [EC:1.-.-.-]	K05602	0.00246648	NA	histidinol-phosphatase [EC:3.1.3.15]
K17938	0.021825	NA	peptide/bleomycin uptake transporter	K01554	0.0024651	NA	8-oxo-dGDP phosphatase [EC:3.6.1.58]
K00247	0.0218188	NA	fumarate reductase subunit D	K22927	0.00246385	NA	cyclic-di-AMP phosphodiesterase [EC:3.1.4.59]
K02494	0.0217826	NA	outer membrane lipoprotein LolB	K06433	0.00245706	NA	small acid-soluble spore protein P (minor)
K08160	0.0217734	NA	MFS transporter, DHA1 family, multidrug/chloramphenicol efflux transport protein	K13955	0.00245646	NA	zinc-binding alcohol dehydrogenase/oxidoreductase
K04073	0.0217516	NA	acetaldehyde dehydrogenase [EC:1.2.1.10]	K07653	0.00245133	NA	two-component system, OmpR family, sensor histidine kinase MprB [EC:2.7.13.3]
K01420	0.0217085	NA	CRP/FNR family transcriptional regulator, anaerobic regulatory protein	K13774	0.00245032	NA	citronellol/citronellal dehydrogenase
K07113	0.0217018	NA	UPF0716 protein FxsA	K15765	0.00244107	NA	toluene monooxygenase electron transfer component [EC:1.18.1.3]
K10711	0.0216843	NA	GntR family transcriptional regulator, frlABCD operon transcriptional regulator	K04040	0.00243799	NA	chlorophyll/bacteriochlorophyll a synthase [EC:2.5.1.62 2.5.1.133]
K16263	0.0216811	NA	amino acid efflux transporter	K10697	0.00243304	NA	two-component system, OmpR family, response regulator RpaA
K11264	0.0216661	NA	methylmalonyl-CoA decarboxylase [EC:4.1.1.-]	K21904	0.00242431	NA	metallothionein
K03694	0.0216487	NA	ATP-dependent Clp protease ATP-binding subunit ClpA	K21103	0.00242034	NA	phenazine-1-carboxylate N-methyltransferase [EC:2.1.1.327]
K07014	0.0216442	NA	uncharacterized protein	K15328	0.00241856	NA	bacillaene synthase trans-acting acyltransferase
K02086	0.021609	NA	DNA replication protein	K10233	0.00241487	NA	alpha-glucoside transport system permease protein
K13694	0.0215879	NA	murein DD-endopeptidase / murein LD-carboxypeptidase [EC:3.4.-.- 3.4.17.13]	K21005	0.00240798	NA	polysaccharide biosynthesis protein PslL
K18446	0.0215523	NA	triphosphatase [EC:3.6.1.25]	K18130	0.00240639	NA	TetR/AcrR family transcriptional regulator, transcriptional repressor NalC
K05780	0.021521	NA	alpha-D-ribose 1-methylphosphonate 5-triphosphate synthase subunit PhnL [EC:2.7.8.37]	K11357	0.00240387	NA	two-component system, cell cycle sensor histidine kinase DivJ [EC:2.7.13.3]
K01910	0.0214947	NA	[citrate (pro-3S)-lyase] ligase [EC:6.2.1.22]	K08196	0.00239685	NA	MFS transporter, AAHS family, cis,cis-muconate transporter
K16136	0.0214925	NA	LacI family transcriptional regulator, maltose regulon regulatory protein	K24117	0.0023943	NA	S-(2-succino)cysteine N-acetyltransferase [EC:2.3.1.-]
K07278	0.0214916	NA	translocation and assembly module TamA	K16958	0.002391	NA	L-cystine transport system permease protein
K05517	0.0214545	NA	nucleoside-specific channel-forming protein	K14671	0.00239007	NA	cyclase
K06212	0.0214485	NA	formate transporter	K21601	0.00238966	NA	DeoR family transcriptional regulator, copper-sensing transcriptional repressor
K12113	0.0214262	NA	LacI family transcriptional regulator, ebg operon repressor	K15655	0.00238963	NA	surfactin family lipopeptide synthetase B
K09971	0.0214185	NA	general L-amino acid transport system permease protein	K11781	0.00238815	M00378	5-amino-6-(D-ribitylamino)uracil---L-tyrosine 4-hydroxyphenyl transferase [EC:2.5.1.147]
K15540	0.0214125	NA	chaperone protein EcpD	K05575	0.00238447	NA	NAD(P)H-quinone oxidoreductase subunit 4 [EC:7.1.1.2]
K04067	0.0213959	NA	primosomal replication protein N''	K21022	0.00237134	NA	diguanylate cyclase [EC:2.7.7.65]
K03747	0.0213811	NA	Smg protein	K13277	0.00236623	NA	minor extracellular protease Epr [EC:3.4.21.-]
K03573	0.0213767	NA	DNA mismatch repair protein MutH	K00314	0.00236026	NA	sarcosine dehydrogenase [EC:1.5.8.3]
K11606	0.0213689	NA	manganese/iron transport system permease protein	K08713	0.0023573	NA	potassium channel LctB
K11905	0.0213577	NA	type VI secretion system protein	K18455	0.00234068	NA	mycothiol S-conjugate amidase [EC:3.5.1.115]
K23778	0.0213475	NA	TetR/AcrR family transcriptional regulator, regulator of biofilm formation and stress response	K21007	0.00233262	NA	polysaccharide biosynthesis protein PelB
K18588	0.0213298	NA	coenzyme Q-binding protein COQ10	K00686	0.002331	NA	protein-glutamine gamma-glutamyltransferase [EC:2.3.2.13]
K12265	0.0213213	NA	nitric oxide reductase FlRd-NAD(+) reductase [EC:1.18.1.-]	K06314	0.00232259	NA	prespore-specific regulator
K11743	0.0213134	NA	spermidine export protein MdtJ	K00988	0.00232012	NA	sulfate adenylyltransferase (ADP) / ATP adenylyltransferase [EC:2.7.7.5 2.7.7.53]
K16053	0.0212834	NA	miniconductance mechanosensitive channel	K09680	0.00230836	M00120	type II pantothenate kinase [EC:2.7.1.33]
K02170	0.0212389	M00572	pimeloyl-[acyl-carrier protein] methyl ester esterase [EC:3.1.1.85]	K03891	0.0023078	NA	ubiquinol-cytochrome c reductase cytochrome b subunit
K03275	0.021233	NA	UDP-glucose:(glucosyl)LPS alpha-1,3-glucosyltransferase [EC:2.4.1.-]	K12263	0.00230272	NA	cytochrome c551
K03608	0.0212321	NA	cell division topological specificity factor	K02692	0.00229853	M00163	photosystem I subunit II
K02182	0.0211941	NA	carnitine-CoA ligase [EC:6.2.1.48]	K12552	0.00229744	NA	penicillin-binding protein 1 [EC:3.4.-.-]
K21759	0.021189	NA	vanillate/4-hydroxybenzoate decarboxylase subunit D [EC:4.1.1.- 4.1.1.61]	K23056	0.0022955	NA	putative lysine/arginine/ornithine/histidine/octopine transport system permease protein
K17723	0.0211822	NA	dihydropyrimidine dehydrogenase (NAD+) subunit PreA [EC:1.3.1.1]	K02716	0.00229366	NA	photosystem II oxygen-evolving enhancer protein 1
K07184	0.0211809	NA	SH3 domain protein	K06323	0.00229291	NA	spore maturation protein CgeE
K15551	0.0211728	NA	taurine transport system substrate-binding protein	K02690	0.00228551	M00163	photosystem I P700 chlorophyll a apoprotein A2
K03810	0.0211529	NA	virulence factor	K06386	0.00227996	NA	stage II sporulation protein Q
K06203	0.0211482	NA	CysZ protein	K05356	0.00227598	NA	all-trans-nonaprenyl-diphosphate synthase [EC:2.5.1.84 2.5.1.85]
K00383	0.0211443	NA	glutathione reductase (NADPH) [EC:1.8.1.7]	K16331	0.0022714	NA	sulfate permease
K02753	0.021136	NA	beta-glucoside (arbutin/salicin/cellobiose) PTS system EIICB component [EC:2.7.1.-]	K21006	0.00227089	NA	polysaccharide biosynthesis protein PelA
K22104	0.0211302	NA	GntR family transcriptional regulator, sialic acid-inducible nan operon repressor	K21464	0.00227057	NA	penicillin-binding protein 2D [EC:2.4.1.129 3.4.16.4]
K09998	0.0211282	NA	arginine transport system permease protein	K03433	0.00226185	NA	proteasome beta subunit [EC:3.4.25.1]
K08304	0.0211183	NA	membrane-bound lytic murein transglycosylase A [EC:4.2.2.-]	K11620	0.00226052	NA	lia operon protein LiaH
K02485	0.0210831	NA	two-component system, response regulator	K06601	0.00226018	NA	flagellar protein FlbT
K13636	0.021073	NA	LysR family transcriptional regulator, D-serine deaminase activator	K16645	0.00225905	NA	heparin binding hemagglutinin HbhA
K00246	0.0210727	M00009	fumarate reductase subunit C	K07695	0.0022579	NA	two-component system, NarL family, response regulator DevR
K00246	0.0210727	M00011	fumarate reductase subunit C	K06349	0.00224925	NA	KinB signaling pathway activation protein
K07140	0.0210654	NA	uncharacterized protein	K05554	0.00224891	M00778	aromatase [EC:4.2.1.-]
K03579	0.0210221	NA	ATP-dependent helicase HrpB [EC:3.6.4.13]	K14660	0.00224344	NA	nodulation protein E [EC:2.3.1.-]
K14982	0.0209943	NA	two-component system, OmpR family, sensor histidine kinase CiaH [EC:2.7.13.3]	K14330	0.0022403	NA	fatty aldehyde-generating acyl-ACP reductase [EC:1.2.1.80]
K09898	0.0209875	NA	uncharacterized protein	K13777	0.00223851	NA	geranyl-CoA carboxylase alpha subunit [EC:6.4.1.5]
K11645	0.0209781	M00001	fructose-bisphosphate aldolase, class I [EC:4.1.2.13]	K06148	0.00222114	NA	ATP-binding cassette, subfamily C, bacterial
K11645	0.0209781	M00003	fructose-bisphosphate aldolase, class I [EC:4.1.2.13]	K02497	0.00221697	NA	HemX protein
K03717	0.0209732	NA	LysR family transcriptional regulator, transcriptional activator of nhaA	K10210	0.00221471	NA	diapolycopene oxygenase [EC:1.14.99.44]
K21742	0.0209678	NA	LysR family transcriptional regulator, transcriptional activator for ttdABT operon	K07670	0.00221314	NA	two-component system, OmpR family, response regulator MtrA
K08319	0.020967	NA	L-threonate 2-dehydrogenase [EC:1.1.1.411]	K04766	0.00220764	NA	acetoin utilization protein AcuA [EC:2.3.1.-]
K11258	0.0209498	M00019	acetolactate synthase II small subunit [EC:2.2.1.6]	K20338	0.0022049	NA	MarR family transcriptional regulator, global regulator for virulence
K11258	0.0209498	M00570	acetolactate synthase II small subunit [EC:2.2.1.6]	K03763	0.0022017	NA	DNA polymerase III subunit alpha, Gram-positive type [EC:2.7.7.7]
K08344	0.0209098	NA	suppressor for copper-sensitivity B	K03432	0.00220168	NA	proteasome alpha subunit [EC:3.4.25.1]
K04775	0.0208891	NA	protease YdgD [EC:3.4.21.-]	K14666	0.00220042	NA	N-acetylglucosaminyltransferase [EC:2.4.1.-]
K04770	0.0208688	NA	Lon-like ATP-dependent protease [EC:3.4.21.-]	K19702	0.00219207	NA	aminopeptidase S [EC:3.4.11.24]
K03490	0.020824	NA	AraC family transcriptional regulator, dual regulator of chb operon	K18678	0.00217613	NA	phytol kinase [EC:2.7.1.182]
K11074	0.0207912	NA	putrescine transport system permease protein	K07465	0.00217051	NA	putative RecB family exonuclease
K07715	0.0207858	NA	two-component system, NtrC family, response regulator GlrR	K01795	0.00216519	NA	mannuronan 5-epimerase [EC:5.1.3.37]
K07781	0.0207778	NA	LuxR family transcriptional regulator, capsular biosynthesis positive transcription factor	K03889	0.00216418	NA	ubiquinol-cytochrome c reductase cytochrome c subunit
K03894	0.0207551	NA	N2-citryl-N6-acetyl-N6-hydroxylysine synthase [EC:6.3.2.38]	K02691	0.00216282	M00163	photosystem I subunit VII
K07121	0.0206871	NA	uncharacterized protein	K06319	0.00216156	NA	spore maturation protein CgeA
K03732	0.0206423	NA	ATP-dependent RNA helicase RhlB [EC:3.6.4.13]	K06407	0.00215972	NA	stage V sporulation protein AE
K15034	0.020633	NA	ribosome-associated protein	K17876	0.00215274	NA	pentalenic acid synthase [EC:1.14.15.11]
K03683	0.0206073	NA	ribonuclease T [EC:3.1.13.-]	K11695	0.00215094	NA	peptidoglycan pentaglycine glycine transferase (the fourth and fifth glycine) [EC:2.3.2.18]
K09862	0.0205979	NA	uncharacterized protein	K07717	0.00215082	NA	two-component system, sensor histidine kinase YcbA [EC:2.7.13.3]
K13638	0.0205815	NA	MerR family transcriptional regulator, Zn(II)-responsive regulator of zntA	K16916	0.00215052	NA	putative peptide transport system permease protein
K07660	0.0205743	NA	two-component system, OmpR family, response regulator PhoP	K11520	0.00214801	NA	two-component system, OmpR family, manganese sensing sensor histidine kinase [EC:2.7.13.3]
K02742	0.0205519	NA	SprT protein	K14198	0.00214473	NA	staphylokinase
K09161	0.0205489	NA	uncharacterized protein	K06439	0.00214235	NA	similar to spore coat protein
K11909	0.0205476	NA	type VI secretion system protein VasI	K06300	0.00214132	NA	spore germination protein PB
K09889	0.0205476	NA	ribosome-associated protein	K11410	0.00214009	NA	short/branched chain acyl-CoA dehydrogenase [EC:1.3.99.12]
K11922	0.0205187	NA	GntR family transcriptional regulator, mannosyl-D-glycerate transport/metabolism system repressor	K06883	0.0021367	NA	uncharacterized protein
K19236	0.0204876	NA	L,D-transpeptidase YcfS	K23598	0.00213332	NA	iseA protein
K07701	0.0204805	NA	two-component system, CitB family, sensor histidine kinase DcuS [EC:2.7.13.3]	K05339	0.00212968	NA	holin-like protein LrgB
K04013	0.0204769	NA	cytochrome c-type protein NrfB	K11027	0.0021257	M00574	pertussis toxin subunit 5
K02813	0.0204602	NA	sorbose PTS system EIIB component [EC:2.7.1.206]	K11615	0.00212464	NA	two-component system, CitB family, response regulator MalR
K02853	0.0203857	NA	enterobacterial common antigen polymerase [EC:2.4.1.-]	K18547	0.00212203	NA	streptogrisin D [EC:3.4.21.-]
K03779	0.0203779	NA	L(+)-tartrate dehydratase alpha subunit [EC:4.2.1.32]	K15525	0.0021189	NA	N-acetyl-1-D-myo-inositol-2-amino-2-deoxy-alpha-D-glucopyranoside deacetylase [EC:3.5.1.103]
K07136	0.0203362	NA	uncharacterized protein	K06440	0.00211366	NA	similar to spore coat protein
K09954	0.0203312	NA	uncharacterized protein	K14331	0.00211364	NA	fatty aldehyde decarbonylase [EC:4.1.99.5]
K06078	0.0203246	NA	murein lipoprotein	K23976	0.00211276	NA	L-aspartate semialdehyde sulfurtransferase ferredoxin
K07070	0.0203138	NA	uncharacterized protein	K00359	0.00210688	NA	NADPH:quinone reductase [EC:1.6.5.5]
K10109	0.020307	NA	maltose/maltodextrin transport system permease protein	K15526	0.00209853	NA	L-cysteine:1D-myo-inositol 2-amino-2-deoxy-alpha-D-glucopyranoside ligase [EC:6.3.1.13]
K17713	0.0203013	NA	outer membrane protein assembly factor BamB	K02244	0.00209027	NA	competence protein ComGB
K21698	0.0202956	NA	LysR family transcriptional regulator, transcriptional activator for aaeXAB operon	K20482	0.00208398	NA	lantibiotic bacteriocin
K01467	0.0202927	NA	beta-lactamase class C [EC:3.5.2.6]	K21454	0.00208074	NA	MarR family transcriptional regulator, teicoplanin-associated locus regulator
K04020	0.0202598	NA	phosphotransacetylase	K09388	0.00207012	NA	uncharacterized protein
K04081	0.0202585	NA	molecular chaperone IbpB	K07008	0.00206622	NA	gamma-glutamyl hercynylcysteine S-oxide hydrolase [EC:3.5.1.118]
K18778	0.0202162	NA	cell division protein ZapD	K14981	0.00206602	NA	two-component system, OmpR family, response regulator ChvI
K05501	0.0201955	NA	TetR/AcrR family transcriptional regulator	K06372	0.00206506	NA	antagonist of SinR
K06149	0.0201944	NA	universal stress protein A	K13573	0.00206162	NA	proteasome accessory factor C
K02562	0.0201921	NA	mannitol operon repressor	K06422	0.00206048	NA	small acid-soluble spore protein E (minor gamma-type SASP)
K06194	0.0201904	NA	lipoprotein NlpD	K03867	0.0020502	NA	UDP-glucose:tetrahydrobiopterin glucosyltransferase [EC:2.4.1.-]
K10537	0.0201821	NA	L-arabinose transport system substrate-binding protein	K17235	0.00204121	NA	arabinosaccharide transport system permease protein
K04082	0.0201774	NA	molecular chaperone HscB	K00032	0.00203751	NA	phosphogluconate 2-dehydrogenase [EC:1.1.1.43]
K03765	0.0201422	NA	transcriptional activator of cad operon	K05382	0.00202448	NA	phycoerythrin-associated linker protein
K21021	0.0201159	NA	diguanylate cyclase [EC:2.7.7.65]	K06417	0.00201839	NA	stage VI sporulation protein D
K18531	0.0201151	NA	putative frv operon regulatory protein	K18004	0.0020183	NA	HQNO biosynthesis monooxygenase PqsL
K02686	0.020079	NA	primosomal replication protein N	K06342	0.00201716	NA	spore coat protein X
K09806	0.020073	NA	uncharacterized protein	K08869	0.00201648	NA	aarF domain-containing kinase
K12266	0.0200698	NA	anaerobic nitric oxide reductase transcription regulator	K08696	0.00201043	NA	carbon dioxide concentrating mechanism protein CcmK
K07262	0.0200589	NA	serine-type D-Ala-D-Ala endopeptidase (penicillin-binding protein 7) [EC:3.4.21.-]	K21009	0.00201006	NA	polysaccharide biosynthesis protein PelD
K15833	0.020054	NA	formate hydrogenlyase regulatory protein HycA	K03890	0.00200565	NA	ubiquinol-cytochrome c reductase iron-sulfur subunit
K08484	0.0200273	NA	phosphotransferase system, enzyme I, PtsP [EC:2.7.3.9]	K19293	0.00199781	NA	alginate biosynthesis protein AlgX
K01529	0.0200272	NA	inosine/xanthosine triphosphatase [EC:3.6.1.73]	K13776	0.00198215	NA	citronellyl-CoA synthetase [EC:6.2.1.-]
K04774	0.0200197	NA	serine protease SohB [EC:3.4.21.-]	K08929	0.00198109	M00597	photosynthetic reaction center M subunit
K06183	0.0200095	NA	16S rRNA pseudouridine516 synthase [EC:5.4.99.19]	K21253	0.00198042	NA	glutathione S-transferase fosA [EC:2.5.1.18]
K02852	0.0199833	NA	UDP-N-acetyl-D-mannosaminouronate:lipid I N-acetyl-D-mannosaminouronosyltransferase [EC:2.4.1.180]	K15226	0.00197882	NA	arogenate dehydrogenase (NADP+) [EC:1.3.1.78]
K03212	0.0199794	NA	23S rRNA (uracil747-C5)-methyltransferase [EC:2.1.1.189]	K19423	0.00197555	NA	glycosyltransferase EpsE [EC:2.4.-.-]
K05778	0.019978	NA	putative thiamine transport system permease protein	K13623	0.00197223	NA	S-adenosylmethionine-diacylgycerolhomoserine-N-methlytransferase
K14061	0.0199067	NA	universal stress protein F	K17245	0.00197155	NA	putative chitobiose transport system permease protein
K13479	0.0198681	NA	xanthine dehydrogenase FAD-binding subunit [EC:1.17.1.4]	K20277	0.00197113	NA	mannose-binding lectin
K16704	0.0198246	NA	dTDP-4-amino-4,6-dideoxy-D-galactose acyltransferase [EC:2.3.1.210]	K19425	0.00196831	NA	glycosyltransferase EpsH [EC:2.4.-.-]
K15827	0.0198216	NA	formate hydrogenlyase subunit 2	K02294	0.00196112	NA	beta-carotene hydroxylase [EC:1.14.13.-]
K08299	0.0197693	NA	crotonobetainyl-CoA hydratase [EC:4.2.1.149]	K05584	0.00195684	NA	NAD(P)H-quinone oxidoreductase subunit M [EC:7.1.1.2]
K03586	0.0197677	NA	cell division protein FtsL	K03206	0.00195647	NA	azobenzene reductase [EC:1.7.1.6]
K11742	0.0197534	NA	spermidine export protein MdtI	K19421	0.00195607	NA	polysaccharide biosynthesis protein EpsC
K18326	0.0197374	NA	MFS transporter, DHA2 family, multidrug resistance protein	K11630	0.00195509	NA	two-component system, OmpR family, bacitracin resistance response regulator BceR
K15835	0.0196888	NA	RpiR family transcriptional regulator, murPQ operon repressor	K16188	0.00195091	NA	tetraprenyl-beta-curcumene synthase [EC:4.2.3.130]
K15536	0.0196501	NA	soluble cytochrome b562	K06312	0.00195027	NA	spore germination protein
K04018	0.0196315	NA	formate-dependent nitrite reductase complex subunit NrfG	K17329	0.00194888	NA	N,N'-diacetylchitobiose transport system substrate-binding protein
K02198	0.019629	NA	cytochrome c-type biogenesis protein CcmF	K07776	0.00194352	NA	two-component system, OmpR family, response regulator RegX3
K03805	0.0196074	NA	thiol:disulfide interchange protein DsbG	K06418	0.00194037	NA	small acid-soluble spore protein A (major alpha-type SASP)
K13643	0.0194918	NA	Rrf2 family transcriptional regulator, iron-sulfur cluster assembly transcription factor	K21831	0.00193528	NA	cholinesterase
K06186	0.0194658	NA	outer membrane protein assembly factor BamE	K20973	0.00193143	NA	two-component system, sensor histidine kinase SagS [EC:2.7.13.3]
K02317	0.0194564	NA	DNA replication protein DnaT	K13060	0.00192359	NA	acyl homoserine lactone synthase [EC:2.3.1.184]
K17879	0.0194436	NA	peroxisomal coenzyme A diphosphatase NUDT7 [EC:3.6.1.-]	K02700	0.00190383	NA	photosystem I subunit XII
K02844	0.0194359	NA	UDP-glucose:(heptosyl)LPS alpha-1,3-glucosyltransferase [EC:2.4.1.-]	K11692	0.0018962	NA	two-component system, CitB family, response regulator DctR
K04568	0.0194092	NA	elongation factor P--(R)-beta-lysine ligase [EC:6.3.1.-]	K06345	0.0018949	NA	spore cortex protein
K11208	0.0193929	NA	GST-like protein	K02722	0.00188828	NA	photosystem II PsbX protein
K09810	0.0193647	NA	lipoprotein-releasing system ATP-binding protein [EC:3.6.3.-]	K22109	0.00188312	NA	HTH-type transcriptional regulator, glycine betaine synthesis regulator
K01147	0.0193481	NA	exoribonuclease II [EC:3.1.13.1]	K08969	0.00187771	NA	L-glutamine---4-(methylsulfanyl)-2-oxobutanoate aminotransferase [EC:2.6.1.117]
K05774	0.0193376	NA	ribose 1,5-bisphosphokinase [EC:2.7.4.23]	K21003	0.00187632	NA	polysaccharide biosynthesis protein PslJ
K02344	0.0193146	NA	DNA polymerase III subunit psi [EC:2.7.7.7]	K06289	0.00187623	NA	spore germination protein AB
K02441	0.0193106	NA	GlpG protein	K22297	0.00187328	NA	Fur family transcriptional regulator, stress-responsive regulator
K07285	0.0193045	NA	outer membrane lipoprotein	K06315	0.00187168	NA	transcriptional regulator of the spore photoproduct lyase operon
K18478	0.0192794	NA	sulfofructose kinase [EC:2.7.1.184]	K18296	0.00186699	NA	multidrug efflux pump
K15922	0.0192712	NA	sulfoquinovosidase [EC:3.2.1.199]	K19433	0.00186428	NA	TasA anchoring/assembly protein
K06195	0.0192669	NA	ApaG protein	K15640	0.00185984	NA	uncharacterized phosphatase
K00756	0.019246	NA	pyrimidine-nucleoside phosphorylase [EC:2.4.2.2]	K11524	0.00185779	NA	positive phototaxis protein PixI
K16077	0.0192242	NA	sucrose porin	K19576	0.00185674	NA	MFS transporter, DHA1 family, quinolone resistance protein
K22927	0.0192086	NA	cyclic-di-AMP phosphodiesterase [EC:3.1.4.59]	K18703	0.00184261	NA	succinate---hydroxymethylglutarate CoA-transferase [EC:2.8.3.13]
K09937	0.019199	NA	uncharacterized protein	K09942	0.00183707	NA	uncharacterized protein
K04337	0.0191846	NA	curli production assembly/transport component CsgE	K07024	0.00183093	NA	sucrose-6-phosphatase [EC:3.1.3.24]
K13922	0.0191765	NA	propionaldehyde dehydrogenase [EC:1.2.1.87]	K13779	0.00182367	NA	isohexenylglutaconyl-CoA hydratase [EC:4.2.1.57]
K16066	0.0191637	M00939	3-hydroxy acid dehydrogenase / malonic semialdehyde reductase [EC:1.1.1.381 1.1.1.-]	K06434	0.00182241	NA	small acid-soluble spore protein (thioredoxin-like protein)
K07648	0.0191576	NA	two-component system, OmpR family, aerobic respiration control sensor histidine kinase ArcB [EC:2.7.13.3]	K04478	0.00182096	NA	monofunctional glycosyltransferase [EC:2.4.1.129]
K08723	0.0191534	NA	5'-nucleotidase [EC:3.1.3.5]	K19593	0.00181974	M00769	outer membrane protein, multidrug efflux system
K11201	0.019135	NA	fructose-like PTS system EIIA component [EC:2.7.1.-]	K04086	0.00181917	NA	ATP-dependent Clp protease ATP-binding subunit ClpL
K03598	0.0190804	NA	sigma-E factor negative regulatory protein RseB	K06294	0.00181278	NA	spore germination protein D
K03112	0.0190595	NA	DamX protein	K07253	0.00180848	NA	phenylpyruvate tautomerase [EC:5.3.2.1]
K07711	0.0190583	NA	two-component system, NtrC family, sensor histidine kinase GlrK [EC:2.7.13.3]	K07691	0.00180813	NA	two-component system, NarL family, competent response regulator ComA
K06899	0.0190561	NA	nucleoid-associated protein	K23058	0.00180329	NA	putative lysine/arginine/ornithine/histidine/octopine transport system ATP-binding protein [EC:7.4.2.1]
K14054	0.019054	NA	murein peptide amidase A	K21166	0.00179945	M00824	enediyne biosynthesis protein E9
K07320	0.0190523	NA	ribosomal protein L3 glutamine methyltransferase [EC:2.1.1.298]	K20330	0.00179764	NA	LuxR family transcriptional regulator, activator of tox operons
K19226	0.0189888	NA	cationic peptide transport system substrate-binding protein	K11950	0.00179583	NA	bicarbonate transport system substrate-binding protein
K00855	0.0189839	NA	phosphoribulokinase [EC:2.7.1.19]	K21429	0.00179507	NA	immunomodulating metalloprotease
K07639	0.0189174	NA	two-component system, OmpR family, sensor histidine kinase RstB [EC:2.7.13.3]	K08226	0.00178996	NA	MFS transporter, BCD family, chlorophyll transporter
K08993	0.0189107	NA	putative membrane protein	K21214	0.0017875	NA	NDP-hexose 4-ketoreductase
K00097	0.0189028	NA	4-hydroxythreonine-4-phosphate dehydrogenase [EC:1.1.1.262]	K06375	0.00178336	NA	stage 0 sporulation protein B (sporulation initiation phosphotransferase) [EC:2.7.-.-]
K02399	0.0189024	NA	flagella synthesis protein FlgN	K08255	0.00177706	NA	CoA-disulfide reductase [EC:1.8.1.14]
K03674	0.0188577	NA	glutaredoxin 1	K02491	0.00177661	NA	two-component system, sporulation sensor kinase A [EC:2.7.13.3]
K09892	0.018827	NA	cell division protein ZapB	K19449	0.00177656	NA	XRE family transcriptional regulator, master regulator for biofilm formation
K07105	0.0187606	NA	uncharacterized protein	K11614	0.00176763	NA	two-component system, CitB family, sensor histidine kinase MalK [EC:2.7.13.3]
K07702	0.0187382	NA	two-component system, CitB family, response regulator CitB	K24268	0.00176248	NA	3-oxoisoapionate-4-phosphate decarboxylase [EC:4.1.1.121]
K00568	0.0187257	M00117	2-polyprenyl-6-hydroxyphenyl methylase / 3-demethylubiquinone-9 3-methyltransferase [EC:2.1.1.222 2.1.1.64]	K06362	0.0017613	NA	response regulator aspartate phosphatase D [EC:3.1.-.-]
K05790	0.0187197	NA	lipopolysaccharide biosynthesis protein WzzE	K19735	0.00175481	NA	LysR family transcriptional regulator, quorum-sensing system regulator MvfR
K04760	0.0187135	NA	transcription elongation factor GreB	K11913	0.00174648	NA	type VI secretion system protein
K02849	0.0186968	NA	heptosyltransferase III [EC:2.4.-.-]	K02096	0.00174355	NA	phycobilisome core-membrane linker protein
K03582	0.0186958	NA	exodeoxyribonuclease V beta subunit [EC:3.1.11.5]	K16637	0.00174255	NA	adenylate cyclase ExoY
K18839	0.0186539	NA	toxin GhoT	K06293	0.00174164	NA	spore germination protein BC
K15724	0.0186458	NA	iron-sulfur cluster insertion protein	K15667	0.00174064	NA	fengycin family lipopeptide synthetase D
K01497	0.0186359	M00125	GTP cyclohydrolase II [EC:3.5.4.25]	K02697	0.00173506	NA	photosystem I subunit IX
K03672	0.0186338	NA	thioredoxin 2 [EC:1.8.1.8]	K04038	0.0017266	NA	light-independent protochlorophyllide reductase subunit N [EC:1.3.7.7]
K11604	0.0186195	NA	manganese/iron transport system substrate-binding protein	K06135	0.00172398	NA	pyrroloquinoline quinone biosynthesis protein A
K16347	0.0186056	NA	entericidin A	K08479	0.00171387	NA	two-component system, OmpR family, clock-associated histidine kinase SasA [EC:2.7.13.3]
K03184	0.0186035	M00117	3-demethoxyubiquinol 3-hydroxylase [EC:1.14.99.60]	K20248	0.00171385	NA	acyl homoserine lactone synthase [EC:2.3.1.184]
K02403	0.018577	NA	flagellar transcriptional activator FlhD	K19760	0.0017096	NA	dynein assembly factor with WDR repeat domains 1
K00094	0.0185304	NA	galactitol-1-phosphate 5-dehydrogenase [EC:1.1.1.251]	K18135	0.00170675	NA	TetR/AcrR family transcriptional regulator, repressor of the mexAB-oprM multidrug resistance operon
K07236	0.0185257	NA	tRNA 2-thiouridine synthesizing protein C	K18958	0.0017061	NA	WhiB family transcriptional regulator, redox-sensing transcriptional regulator
K12957	0.0184895	NA	alcohol/geraniol dehydrogenase (NADP+) [EC:1.1.1.2 1.1.1.183]	K14195	0.00170563	NA	surface protein G
K09181	0.018488	NA	acetyltransferase	K11332	0.00170205	NA	two-component system, OmpR family, response regulator NblR
K18850	0.0184561	NA	50S ribosomal protein L16 3-hydroxylase [EC:1.14.11.47]	K14203	0.00169916	NA	FPRL1 inhibitory protein
K13650	0.018423	NA	MqsR-controlled colanic acid and biofilm protein A	K19242	0.00169373	NA	LysR family transcriptional regulator, repressor for citA
K15634	0.0184211	M00001	2,3-bisphosphoglycerate-dependent phosphoglycerate mutase [EC:5.4.2.11]	K00271	0.00169135	NA	valine dehydrogenase (NAD+) [EC:1.4.1.23]
K15634	0.0184211	M00002	2,3-bisphosphoglycerate-dependent phosphoglycerate mutase [EC:5.4.2.11]	K21779	0.00168757	M00837	2-methyl-3-n-amyl-dihydropyrrolel dehydrogenase
K15634	0.0184211	M00003	2,3-bisphosphoglycerate-dependent phosphoglycerate mutase [EC:5.4.2.11]	K11032	0.00168612	NA	hemolysin II
K05809	0.0184015	NA	ribosome-associated inhibitor A	K21025	0.00168397	NA	multidomain signaling protein FimX
K09712	0.0183914	NA	uncharacterized protein	K13714	0.00168206	NA	bifunctional autolysin [EC:3.5.1.28 3.2.1.96]
K19416	0.018369	NA	modulator of FtsH protease	K06401	0.00168194	NA	stage IV sporulation protein FA
K13632	0.018363	NA	AraC family transcriptional regulator, mar-sox-rob regulon activator	K07770	0.00168187	NA	two-component system, OmpR family, response regulator CssR
K07662	0.0183548	NA	two-component system, OmpR family, response regulator CpxR	K05585	0.00167235	NA	NAD(P)H-quinone oxidoreductase subunit N [EC:7.1.1.2]
K22650	0.0183344	NA	luxR family transcriptional regulator, regulator of transport and utilization of aryl beta-glucosides	K03886	0.00166866	NA	menaquinol-cytochrome c reductase iron-sulfur subunit [EC:1.10.2.-]
K00998	0.0183211	M00093	CDP-diacylglycerol---serine O-phosphatidyltransferase [EC:2.7.8.8]	K11919	0.00166192	NA	type VI secretion system lysozyme-related protein
K00112	0.018321	NA	glycerol-3-phosphate dehydrogenase subunit B [EC:1.1.5.3]	K11522	0.00165922	NA	two-component system, chemotaxis family, response regulator PixG
K11732	0.0182762	NA	phenylalanine-specific permease	K21008	0.00165583	NA	polysaccharide biosynthesis protein PelC
K03706	0.0182486	NA	transcriptional pleiotropic repressor	K06348	0.00165505	NA	sporulation inhibitor KapD
K03600	0.0182455	NA	stringent starvation protein B	K19975	0.00165166	NA	manganese transport system substrate-binding protein
K06146	0.01822	NA	LacI family transcriptional regulator, gluconate utilization system Gnt-II transcriptional activator	K02718	0.00164974	NA	photosystem II PsbT protein
K07287	0.0181888	NA	outer membrane protein assembly factor BamC	K03887	0.00164296	NA	menaquinol-cytochrome c reductase cytochrome b subunit
K11179	0.0181872	NA	tRNA 2-thiouridine synthesizing protein E [EC:2.8.1.-]	K15579	0.00164271	NA	nitrate/nitrite transport system ATP-binding protein
K05800	0.0181794	NA	Lrp/AsnC family transcriptional regulator	K08927	0.00164175	NA	light-harvesting complex 1 beta chain
K03532	0.0181736	NA	trimethylamine-N-oxide reductase (cytochrome c), cytochrome c-type subunit TorC	K11336	0.00163618	NA	3-vinyl bacteriochlorophyllide hydratase [EC:4.2.1.165]
K19230	0.0181624	NA	cationic peptide transport system ATP-binding protein	K22708	0.00163325	NA	poly(ribitol-phosphate) beta-N-acetylglucosaminyltransferase [EC:2.4.1.355]
K00557	0.0181023	NA	tRNA (uracil-5-)-methyltransferase [EC:2.1.1.35]	K19032	0.00162948	NA	30S ribosomal protein 3
K02402	0.0180281	NA	flagellar transcriptional activator FlhC	K18351	0.00162929	NA	two-component system, OmpR family, sensor histidine kinase VanS [EC:2.7.13.3]
K16787	0.0180162	NA	energy-coupling factor transport system ATP-binding protein [EC:3.6.3.-]	K06049	0.00162572	NA	magnesium chelatase accessory protein
K15549	0.018013	NA	membrane fusion protein, multidrug efflux system	K01970	0.00161755	NA	acyl-CoA carboxylase subunit beta [EC:6.4.1.-]
K08990	0.0179726	NA	putative membrane protein	K09818	0.00160962	NA	manganese/iron transport system substrate-binding protein
K08317	0.0179622	NA	hydroxycarboxylate dehydrogenase A [EC:1.1.1.-]	K06355	0.00160893	NA	phosphatase RapF regulator
K10973	0.01794	NA	IclR family transcriptional regulator, negative regulator of allantoin and glyoxylate utilization operons	K06597	0.00160873	NA	chemosensory pili system protein ChpB (putative protein-glutamate methylesterase)
K12500	0.0179058	NA	thioesterase III [EC:3.1.2.-]	K19976	0.00160293	NA	manganese transport system permease protein
K09918	0.0179008	NA	uncharacterized protein	K02717	0.00160182	NA	photosystem II oxygen-evolving enhancer protein 2
K02777	0.0178929	NA	sugar PTS system EIIA component [EC:2.7.1.-]	K14606	0.00159417	NA	lycopene cyclase CruP [EC:5.5.1.19]
K05798	0.0178533	NA	LysR family transcriptional regulator, transcriptional activator for leuABCD operon	K11356	0.00158946	NA	two-component system, sensor histidine kinase and response regulator [EC:2.7.13.3]
K03473	0.0178034	NA	erythronate-4-phosphate dehydrogenase [EC:1.1.1.290]	K06216	0.00158756	NA	putative ribose uptake protein
K15737	0.0177899	NA	glutarate dioxygenase [EC:1.14.11.64]	K19279	0.00158091	NA	aminoglycoside 9-adenylyltransferase [EC:2.7.7.-]
K13920	0.0177795	NA	propanediol dehydratase small subunit [EC:4.2.1.28]	K06341	0.00157782	NA	spore coat protein W
K07674	0.0177759	NA	two-component system, NarL family, nitrate/nitrite sensor histidine kinase NarQ [EC:2.7.13.3]	K19422	0.00157779	NA	glycosyltransferase EpsD [EC:2.4.-.-]
K06879	0.0177511	NA	7-cyano-7-deazaguanine reductase [EC:1.7.1.13]	K09845	0.0015772	NA	1-hydroxycarotenoid 3,4-desaturase [EC:1.3.99.27]
K15830	0.0177487	NA	formate hydrogenlyase subunit 5	K05552	0.00157659	M00778	minimal PKS chain-length factor (CLF/KS beta) [EC:2.3.1.- 2.3.1.260 2.3.1.235]
K13923	0.017731	NA	phosphate propanoyltransferase [EC:2.3.1.222]	K07094	0.00157651	NA	putative glycerol-1-phosphate prenyltransferase [EC:2.5.1.-]
K15547	0.0177208	NA	multidrug resistance protein MdtO	K08903	0.00156934	NA	photosystem II 13kDa protein
K03745	0.0176905	NA	SlyX protein	K00464	0.00156815	NA	all-trans-8'-apo-beta-carotenal 15,15'-oxygenase [EC:1.13.11.75]
K05245	0.0176827	NA	L-carnitine/gamma-butyrobetaine antiporter	K13276	0.00156484	NA	bacillopeptidase F [EC:3.4.21.-]
K19761	0.0176774	NA	gamma-glutamylaminecyclotransferase [EC:2.3.2.-]	K18906	0.00156088	M00700	MarR family transcriptional regulator, multiple gene regulator MgrA
K11139	0.0176529	NA	hemolysin E	K18906	0.00156088	M00702	MarR family transcriptional regulator, multiple gene regulator MgrA
K01414	0.0176287	NA	oligopeptidase A [EC:3.4.24.70]	K18906	0.00156088	M00704	MarR family transcriptional regulator, multiple gene regulator MgrA
K01582	0.0176054	NA	lysine decarboxylase [EC:4.1.1.18]	K06437	0.00156027	NA	sigma-E controlled sporulation protein
K01085	0.0176005	NA	glucose-1-phosphatase [EC:3.1.3.10]	K11180	0.0015599	M00596	dissimilatory sulfite reductase alpha subunit [EC:1.8.99.5]
K12152	0.0175494	NA	phosphatase NudJ [EC:3.6.1.-]	K10814	0.00155616	NA	hydrogen cyanide synthase HcnA [EC:1.4.99.5]
K12507	0.0175354	NA	acyl-CoA synthetase [EC:6.2.1.-]	K15656	0.00155277	NA	surfactin family lipopeptide synthetase C
K07700	0.017511	NA	two-component system, CitB family, cit operon sensor histidine kinase CitA [EC:2.7.13.3]	K06366	0.00154943	NA	response regulator aspartate phosphatase H [EC:3.1.-.-]
K19229	0.0174693	NA	cationic peptide transport system ATP-binding protein	K11694	0.00154739	NA	peptidoglycan pentaglycine glycine transferase (the second and third glycine) [EC:2.3.2.17]
K07640	0.0174544	NA	two-component system, OmpR family, sensor histidine kinase CpxA [EC:2.7.13.3]	K08926	0.0015472	NA	light-harvesting complex 1 alpha chain
K02850	0.0174503	NA	heptose II phosphotransferase [EC:2.7.1.-]	K11629	0.00154679	NA	two-component system, OmpR family, bacitracin resistance sensor histidine kinase BceS [EC:2.7.13.3]
K16074	0.017433	NA	zinc transporter	K10208	0.00154216	NA	4,4'-diapophytoene synthase [EC:2.5.1.96]
K11534	0.0173867	NA	DeoR family transcriptional regulator, deoxyribose operon repressor	K05553	0.00153706	M00778	minimal PKS acyl carrier protein
K24204	0.0173717	NA	mannitol-1-/sugar-/sorbitol-6-/2-deoxyglucose-6-phosphatase [EC:3.1.3.22 3.1.3.23 3.1.3.50 3.1.3.68]	K21148	0.00153641	NA	[CysO sulfur-carrier protein]-thiocarboxylate-dependent cysteine synthase [EC:2.5.1.113]
K11937	0.0172643	NA	biofilm PGA synthesis protein PgaD	K16920	0.00153236	NA	acetoin utilization transport system ATP-binding protein
K11938	0.0172108	NA	HMP-PP phosphatase [EC:3.6.1.-]	K12049	0.00153206	NA	ComB9 competence protein
K07821	0.0172082	NA	trimethylamine-N-oxide reductase (cytochrome c), cytochrome c-type subunit TorY	K11440	0.00153155	NA	choline dehydrogenase [EC:1.1.1.1]
K08306	0.0172048	NA	membrane-bound lytic murein transglycosylase C [EC:4.2.2.-]	K06335	0.00152775	NA	spore coat protein M
K12297	0.0171884	NA	23S rRNA (guanine2445-N2)-methyltransferase / 23S rRNA (guanine2069-N7)-methyltransferase [EC:2.1.1.173 2.1.1.264]	K18770	0.00151077	NA	penicillin-binding protein 4 [EC:2.4.1.129 3.4.16.4]
K14064	0.0171761	NA	universal stress protein C	K03428	0.00150993	NA	magnesium-protoporphyrin O-methyltransferase [EC:2.1.1.11]
K11930	0.0171328	NA	periplasmic protein TorT	K11779	0.00150368	NA	FO synthase [EC:2.5.1.147 4.3.1.32]
K05789	0.0170924	NA	chain length determinant protein (polysaccharide antigen chain regulator)	K13767	0.00149832	M00087	enoyl-CoA hydratase [EC:4.2.1.17]
K00631	0.0169784	NA	glycerol-3-phosphate O-acyltransferase [EC:2.3.1.15]	K16862	0.00149589	NA	mitochondrial cardiolipin hydrolase [EC:3.1.4.-]
K07757	0.0169629	NA	sugar-phosphatase [EC:3.1.3.23]	K05551	0.00149457	M00778	minimal PKS ketosynthase (KS/KS alpha) [EC:2.3.1.- 2.3.1.260 2.3.1.235]
K04765	0.0169367	NA	nucleoside triphosphate diphosphatase [EC:3.6.1.9]	K19428	0.00149456	NA	sugar transferase EpsL [EC:2.-.-.-]
K13635	0.0169193	NA	LysR family transcriptional regulator, cys regulon transcriptional activator	K07698	0.00148574	NA	two-component system, sporulation sensor kinase C [EC:2.7.13.3]
K07751	0.0169191	NA	PepB aminopeptidase [EC:3.4.11.23]	K17872	0.00148096	M00932	demethylphylloquinone reductase [EC:1.6.5.12]
K07773	0.0169082	NA	two-component system, OmpR family, aerobic respiration control protein ArcA	K15126	0.00146839	NA	type III secretion system cytotoxic effector protein
K19228	0.0169066	NA	cationic peptide transport system permease protein	K02715	0.00146676	NA	PsbN protein
K07678	0.0168962	NA	two-component system, NarL family, sensor histidine kinase BarA [EC:2.7.13.3]	K06389	0.00146337	NA	stage II sporulation protein SB
K09911	0.016871	NA	uncharacterized protein	K23095	0.0014513	M00932	demethylphylloquinol methyltransferase [EC:2.1.1.329]
K11963	0.0168353	NA	urea transport system ATP-binding protein	K04039	0.00145111	NA	light-independent protochlorophyllide reductase subunit B [EC:1.3.7.7]
K23227	0.0167829	NA	ferric hydroxamate transport system substrate-binding protein	K06370	0.00144718	NA	morphogenetic protein associated with SpoVID
K05880	0.0167451	NA	transcriptional activator for dhaKLM operon	K11337	0.00142874	NA	bacteriochlorophyllide a dehydrogenase [EC:1.1.1.396]
K15828	0.0167234	NA	formate hydrogenlyase subunit 3	K02287	0.00142424	NA	phycocyanin-associated, rod
K02858	0.0167217	M00125	3,4-dihydroxy 2-butanone 4-phosphate synthase [EC:4.1.99.12]	K02636	0.00142145	NA	cytochrome b6-f complex iron-sulfur subunit [EC:7.1.1.6]
K09915	0.0165937	NA	uncharacterized protein	K05572	0.00140358	NA	NAD(P)H-quinone oxidoreductase subunit 1 [EC:7.1.1.2]
K09802	0.0165575	NA	uncharacterized protein	K08259	0.00140291	NA	lysostaphin [EC:3.4.24.75]
K01708	0.0165542	NA	galactarate dehydratase [EC:4.2.1.42]	K06322	0.00140281	NA	spore maturation protein CgeD
K09908	0.016547	NA	uncharacterized protein	K06290	0.00139613	NA	spore germination protein AC
K08312	0.0165425	NA	ADP-ribose diphosphatase [EC:3.6.1.-]	K23064	0.00139486	NA	hydroxyproline transport system ATP-binding protein [EC:7.4.2.1]
K01096	0.0165033	NA	phosphatidylglycerophosphatase B [EC:3.1.3.27 3.1.3.81 3.1.3.4 3.6.1.27]	K01604	0.00139464	NA	methylmalonyl-CoA decarboxylase subunit alpha [EC:7.2.4.3]
K03974	0.0164603	NA	psp operon transcriptional activator	K23722	0.00139332	NA	iron(III)-enterobactin esterase [EC:3.1.1.108]
K15396	0.0164535	NA	tRNA (cytidine32/uridine32-2'-O)-methyltransferase [EC:2.1.1.200]	K02637	0.00139276	NA	cytochrome b6-f complex subunit 4
K06202	0.016439	NA	CyaY protein	K11526	0.00138678	NA	two-component system, chemotaxis family, sensor histidine kinase and response regulator PixL
K22214	0.0164346	NA	propionyl-CoA:succinyl-CoA transferase [EC:2.8.3.-]	K13300	0.00137068	NA	cytochrome c550
K09899	0.0164336	NA	uncharacterized protein	K12238	0.00137001	NA	salicylate---[aryl-carrier protein] ligase [EC:6.2.1.61]
K05802	0.016415	NA	potassium-dependent mechanosensitive channel	K19290	0.00136954	NA	mannuronan synthase [EC:2.4.1.33]
K15548	0.0163722	NA	p-hydroxybenzoic acid efflux pump subunit AaeA	K04037	0.00136892	NA	light-independent protochlorophyllide reductase subunit L [EC:1.3.7.7]
K09910	0.0163669	NA	uncharacterized protein	K22409	0.00136892	NA	N-acetylmuramoyl-L-alanine amidase [EC:3.5.1.28]
K03591	0.016354	NA	cell division protein FtsN	K03403	0.00136486	NA	magnesium chelatase subunit H [EC:6.6.1.1]
K13634	0.0163215	NA	LysR family transcriptional regulator, cys regulon transcriptional activator	K11028	0.00136265	NA	vacuolating cytotoxin
K07708	0.0163042	NA	two-component system, NtrC family, nitrogen regulation sensor histidine kinase GlnL [EC:2.7.13.3]	K02724	0.00135167	NA	photosystem II PsbZ protein
K21085	0.0163013	NA	diguanylate cyclase [EC:2.7.7.65]	K06388	0.00135143	NA	stage II sporulation protein SA
K07122	0.0162663	NA	phospholipid transport system transporter-binding protein	K05579	0.0013394	NA	NAD(P)H-quinone oxidoreductase subunit H [EC:7.1.1.2]
K03314	0.0162585	NA	Na+:H+ antiporter, NhaB family	K02859	0.00133883	NA	riboflavin biosynthesis RibT protein
K09999	0.0162367	NA	arginine transport system permease protein	K02286	0.0013387	NA	phycocyanin-associated rod linker protein
K02679	0.0162205	NA	prepilin peptidase dependent protein A	K19420	0.00132925	NA	protein tyrosine kinase EpsB modulator
K02196	0.0161577	NA	heme exporter protein D	K06311	0.00132556	NA	spore germination protein
K05785	0.0161576	NA	transcriptional antiterminator RfaH	K02285	0.00132464	NA	phycocyanin beta chain
K07772	0.0161415	NA	two-component system, OmpR family, torCAD operon response regulator TorR	K18286	0.00131122	M00930	aminodeoxyfutalosine deaminase [EC:3.5.4.40]
K15834	0.0161377	NA	formate hydrogenlyase maturation protein HycH	K05581	0.00130461	NA	NAD(P)H-quinone oxidoreductase subunit J [EC:7.1.1.2]
K01460	0.0161128	NA	glutathionylspermidine amidase/synthetase [EC:3.5.1.78 6.3.1.8]	K19432	0.0012972	NA	anti-repressor of SlrR
K13243	0.0161099	NA	c-di-GMP-specific phosphodiesterase [EC:3.1.4.52]	K15666	0.00129209	NA	fengycin family lipopeptide synthetase C
K16695	0.0160872	NA	lipopolysaccharide exporter	K02247	0.0012797	NA	competence protein ComGE
K19113	0.0160726	NA	acetyltransferase [EC:2.3.1.-]	K16885	0.00126957	NA	quinone-modifying oxidoreductase, subunit QmoA
K11192	0.0160635	NA	N-acetylmuramic acid PTS system EIICB component [EC:2.7.1.192]	K17940	0.00124262	NA	2-heptyl-3-hydroxy-4(1H)-quinolone synthase [EC:1.14.13.182]
K02972	0.0160207	NA	stationary-phase-induced ribosome-associated protein	K04035	0.00124084	NA	magnesium-protoporphyrin IX monomethyl ester (oxidative) cyclase [EC:1.14.13.81]
K09909	0.0160181	NA	uncharacterized protein	K18545	0.00123842	NA	streptogrisin B [EC:3.4.21.81]
K09921	0.0159648	NA	uncharacterized protein	K16887	0.0012174	NA	quinone-modifying oxidoreductase, subunit QmoC
K07043	0.015956	NA	UTP pyrophosphatase [EC:3.6.1.-]	K05383	0.00121533	NA	CpeT protein
K02505	0.0159394	NA	protein transport protein HofC	K06427	0.00121195	NA	small acid-soluble spore protein J (minor)
K01484	0.0159233	NA	succinylarginine dihydrolase [EC:3.5.3.23]	K18002	0.0011849	NA	2-heptyl-4(1H)-quinolone synthase subunit PqsC [EC:2.3.1.230]
K15722	0.0158986	NA	cell division activator	K23094	0.00117532	M00932	2-carboxy-1,4-naphthoquinone phytyltransferase [EC:2.5.1.130]
K01141	0.0158895	NA	exodeoxyribonuclease I [EC:3.1.11.1]	K21428	0.00117036	M00837	3-acetyloctanal synthase [EC:2.2.1.12]
K10002	0.0158721	NA	glutamate/aspartate transport system permease protein	K02713	0.001165	NA	photosystem II PsbL protein
K03675	0.0158112	NA	glutaredoxin 2	K06873	0.00115934	NA	uncharacterized protein
K12144	0.0158098	NA	hydrogenase-4 component I [EC:1.-.-.-]	K05928	0.00115876	M00112	tocopherol O-methyltransferase [EC:2.1.1.95]
K07676	0.0157471	NA	two-component system, NarL family, sensor histidine kinase RcsD [EC:2.7.13.3]	K11008	0.00115796	NA	cytotoxic necrotizing factor 1
K05526	0.0157455	NA	succinylglutamate desuccinylase [EC:3.5.1.96]	K02253	0.00115477	NA	competence protein ComX
K02848	0.015699	NA	heptose I phosphotransferase [EC:2.7.1.-]	K16635	0.00115301	NA	exoenzyme S
K19775	0.0156983	NA	GntR family transcriptional regulator, hexuronate regulon transcriptional repressor	K08698	0.0011501	NA	carbon dioxide concentrating mechanism protein CcmM
K02345	0.0156866	NA	DNA polymerase III subunit theta [EC:2.7.7.7]	K02643	0.00114484	NA	cytochrome b6-f complex subunit 7
K07186	0.0156439	NA	membrane protein	K12073	0.00113571	M00932	1,4-dihydroxy-2-naphthoyl-CoA hydrolase [EC:3.1.2.28]
K08320	0.015637	NA	(d)CTP diphosphatase [EC:3.6.1.65]	K08904	0.00113141	NA	photosystem II Psb28-2 protein
K04336	0.0155839	NA	curli production protein	K09683	0.0011217	NA	hut operon positive regulatory protein
K03788	0.0155505	NA	acid phosphatase (class B) [EC:3.1.3.2]	K12683	0.00111067	NA	serum resistance protein
K11920	0.0154363	NA	AraC family transcriptional regulator	K02712	0.001109	NA	photosystem II PsbK protein
K05805	0.0154045	NA	CreA protein	K13991	0.00110833	NA	photosynthetic reaction center H subunit
K03533	0.0153801	NA	TorA specific chaperone	K02293	0.00109192	NA	15-cis-phytoene desaturase [EC:1.3.5.5]
K20861	0.015356	M00125	FMN hydrolase / 5-amino-6-(5-phospho-D-ribitylamino)uracil phosphatase [EC:3.1.3.102 3.1.3.104]	K10960	0.00108624	NA	geranylgeranyl diphosphate/geranylgeranyl-bacteriochlorophyllide a reductase [EC:1.3.1.83 1.3.1.111]
K21637	0.0153015	NA	anti-adapter protein IraD	K11521	0.00106434	NA	two-component system, OmpR family, manganese sensing response regulator
K00892	0.0152605	NA	inosine kinase [EC:2.7.1.73]	K23139	0.0010608	NA	cytochrome P450 family 110 [EC:1.14.-.-]
K09891	0.0152364	NA	uncharacterized protein	K16917	0.00105263	NA	putative peptide transport system ATP-binding protein
K00835	0.0152041	NA	valine--pyruvate aminotransferase [EC:2.6.1.66]	K02704	0.00104943	M00161	photosystem II CP47 chlorophyll apoprotein
K10857	0.0151531	NA	exodeoxyribonuclease X [EC:3.1.11.-]	K15847	0.00103875	NA	outer membrane protein BabA
K06039	0.0151328	NA	uncharacterized protein involved in oxidation of intracellular sulfur	K12089	0.00103378	NA	cag pathogenicity island protein 4
K23545	0.0151313	NA	sugar transport system substrate-binding protein	K22918	0.00103363	M00856	typhoid toxin secretion A
K06968	0.0151072	NA	23S rRNA (cytidine2498-2'-O)-methyltransferase [EC:2.1.1.186]	K02097	0.00103303	NA	phycobilisome core component
K02854	0.0150982	NA	AraC family transcriptional regulator, L-rhamnose operon transcriptional activator RhaR	K11523	0.00102775	NA	two-component system, chemotaxis family, response regulator PixH
K13938	0.0150898	NA	dihydromonapterin reductase / dihydrofolate reductase [EC:1.5.1.50 1.5.1.3]	K02694	0.00102384	M00163	photosystem I subunit III
K14762	0.0150723	NA	ribosome-associated protein	K02699	0.00101928	NA	photosystem I subunit XI
K03840	0.015069	NA	flavodoxin II	K02634	0.00101812	NA	apocytochrome f
K19303	0.015028	NA	murein DD-endopeptidase [EC:3.4.-.-]	K16921	0.00101553	NA	acetoin utilization transport system ATP-binding protein
K14065	0.0149941	NA	universal stress protein D	K12086	0.00100605	NA	cag pathogenicity island protein 1
K03618	0.0149852	NA	hydrogenase-1 operon protein HyaF	K08902	0.00100199	NA	photosystem II Psb27 protein
K07109	0.0149579	NA	uncharacterized protein	K02290	0.00100035	NA	phycobilisome rod-core linker protein
K02255	0.0149501	NA	ferritin-like protein 2	K19122	0.000996992	NA	CRISPR-associated protein Csc3
K05984	0.0149425	NA	excinuclease Cho [EC:3.1.25.-]	K11691	0.000995553	NA	two-component system, CitB family, sensor histidine kinase DctS [EC:2.7.13.3]
K07153	0.0148777	NA	high frequency lysogenization protein	K15848	0.000989963	NA	outer membrane protein SabA
K11391	0.0148755	NA	23S rRNA (guanine1835-N2)-methyltransferase [EC:2.1.1.174]	K09844	0.000962923	NA	carotenoid 1,2-hydratase [EC:4.2.1.131]
K21972	0.014855	NA	MerR family transcriptional regulator, repressor of blue light- and temperature-responsive genes	K11334	0.000935516	NA	3,8-divinyl chlorophyllide a/chlorophyllide a reductase subunit Y [EC:1.3.7.14 1.3.7.15]
K02504	0.0148484	NA	protein transport protein HofB	K11329	0.000919598	NA	two-component system, OmpR family, response regulator RpaB
K19235	0.0148236	NA	L,D-transpeptidase YbiS	K02693	0.000897105	M00163	photosystem I subunit IV
K02442	0.0148093	NA	membrane protein GlpM	K20024	0.000893507	NA	monoglucosyldiacylglycerol epimerase [EC:5.1.3.34]
K13301	0.0147393	NA	secretion monitor	K02710	0.000887656	NA	photosystem II PsbI protein
K04064	0.0147356	NA	osmotically inducible lipoprotein OsmE	K02635	0.000887021	NA	cytochrome b6
K04016	0.0146942	NA	cytochrome c-type biogenesis protein NrfE	K02696	0.000884261	NA	photosystem I subunit VIII
K05368	0.0146572	NA	NAD(P)H-flavin reductase [EC:1.5.1.41]	K00514	0.000875518	NA	zeta-carotene desaturase [EC:1.3.5.6]
K00885	0.0146211	NA	N-acylmannosamine kinase [EC:2.7.1.60]	K09833	0.000867912	M00112	homogentisate phytyltransferase / homogentisate geranylgeranyltransferase [EC:2.5.1.115 2.5.1.116]
K12148	0.0146193	NA	biofilm regulator BssS	K05582	0.000864727	NA	NAD(P)H-quinone oxidoreductase subunit K [EC:7.1.1.2]
K07286	0.0146173	NA	uncharacterized lipoprotein	K02292	0.000845164	NA	beta-carotene ketolase (CrtO type)
K09920	0.0145683	NA	uncharacterized protein	K23975	0.000838011	NA	L-aspartate semialdehyde sulfurtransferase [EC:2.8.1.16]
K12525	0.014559	M00016	bifunctional aspartokinase / homoserine dehydrogenase 2 [EC:2.7.2.4 1.1.1.3]	K02689	0.000816556	M00163	photosystem I P700 chlorophyll a apoprotein A1
K12525	0.014559	M00017	bifunctional aspartokinase / homoserine dehydrogenase 2 [EC:2.7.2.4 1.1.1.3]	K15846	0.000810998	NA	neuraminyllactose-binding hemagglutinin
K12525	0.014559	M00018	bifunctional aspartokinase / homoserine dehydrogenase 2 [EC:2.7.2.4 1.1.1.3]	K00218	0.000794778	NA	protochlorophyllide reductase [EC:1.3.1.33]
K06957	0.0145452	NA	tRNA(Met) cytidine acetyltransferase [EC:2.3.1.193]	K21778	0.000789271	M00837	3-acetyloctanal aminotransferase [EC:2.6.1.-]
K06141	0.0145024	NA	MFS transporter, TsgA protein	K02640	0.000787936	NA	cytochrome b6-f complex subunit 5
K21638	0.0144823	NA	anti-adapter protein IraM	K07242	0.000767411	NA	putative multicomponent Na+:H+ antiporter subunit B
K02812	0.0144793	NA	sorbose PTS system EIIA component [EC:2.7.1.206]	K18000	0.000761096	NA	anthranilate-CoA ligase [EC:6.2.1.32]
K03759	0.0144763	NA	arginine:agmatine antiporter	K20494	0.000745691	NA	lantibiotic transport system permease protein
K13574	0.0144653	NA	hydroxycarboxylate dehydrogenase B [EC:1.1.1.237 1.1.1.-]	K00214	0.000745613	NA	biliverdin reductase [EC:1.3.1.24]
K03485	0.0143472	NA	LacI family transcriptional regulator, trehalose operon repressor	K09835	0.000734508	NA	prolycopene isomerase [EC:5.2.1.13]
K03804	0.014333	NA	chromosome partition protein MukE	K19083	0.000732915	NA	bacitracin transport system ATP-binding protein
K09916	0.0142849	NA	uncharacterized protein	K19121	0.000715374	NA	CRISPR-associated protein Csc2
K05851	0.014268	NA	adenylate cyclase, class 1 [EC:4.6.1.1]	K11954	0.000709459	NA	neutral amino acid transport system substrate-binding protein
K18140	0.0142502	NA	TetR/AcrR family transcriptional regulator, acrEF/envCD operon repressor	K02707	0.000704353	M00161	photosystem II cytochrome b559 subunit alpha
K18325	0.0141814	NA	AraC family of transcriptional regulator, multidrug resistance transcriptional activator	K09814	0.000685035	NA	hemin transport system ATP-binding protein [EC:3.6.3.-]
K12139	0.0141801	NA	hydrogenase-4 component D [EC:1.-.-.-]	K05371	0.000675512	NA	phycocyanobilin:ferredoxin oxidoreductase [EC:1.3.7.5]
K10016	0.0141207	NA	histidine transport system permease protein	K18001	0.000665449	NA	2-heptyl-4(1H)-quinolone synthase subunit PqsB [EC:2.3.1.230]
K07479	0.0140585	NA	putative DNA topoisomerase	K08480	0.000648146	NA	circadian clock protein KaiA
K09902	0.0140399	NA	uncharacterized protein	K18099	0.000645908	NA	LuxR family transcriptional regulator, quorum-sensing system regulator RhlR
K23236	0.0139623	NA	two-component-system connector protein SafA	K02093	0.000645581	NA	allophycocyanin beta subunit
K01825	0.0138977	NA	3-hydroxyacyl-CoA dehydrogenase / enoyl-CoA hydratase / 3-hydroxybutyryl-CoA epimerase / enoyl-CoA isomerase [EC:1.1.1.35 4.2.1.17 5.1.2.3 5.3.3.8]	K08699	0.000625647	NA	carbon dioxide concentrating mechanism protein CcmN
K11736	0.013794	NA	proline-specific permease ProY	K00284	0.000610296	NA	glutamate synthase (ferredoxin) [EC:1.4.7.1]
K10986	0.0137444	NA	galactosamine PTS system EIID component	K22705	0.000610087	NA	hopanoid C-2 methylase [EC:2.1.1.-]
K15831	0.0136997	NA	formate hydrogenlyase subunit 6	K11325	0.000605317	NA	L-cysteine/cystine lyase
K07470	0.0136692	NA	DNA gyrase inhibitor	K02288	0.000593907	NA	phycocyanobilin lyase subunit alpha [EC:4.4.1.32]
K05711	0.0136467	NA	2,3-dihydroxy-2,3-dihydrophenylpropionate dehydrogenase [EC:1.3.1.87]	K10257	0.000587792	NA	acyl-lipid omega-3 desaturase [EC:1.14.19.25 1.14.19.35 1.14.19.36]
K14348	0.0136457	NA	GntR family transcriptional regulator, L-lactate dehydrogenase operon regulator	K02642	0.000574181	NA	cytochrome b6-f complex subunit 6
K15545	0.0136445	NA	transcriptional regulator of PTS gene	K10945	0.000571421	M00174	methane/ammonia monooxygenase subunit B
K03459	0.0136293	NA	formate transporter	K02755	0.000567649	NA	beta-glucoside PTS system EIIA component [EC:2.7.1.-]
K02680	0.0136259	NA	prepilin peptidase dependent protein B	K07769	0.000566072	NA	two-component system, OmpR family, sensor histidine kinase NblS [EC:2.7.13.3]
K13654	0.0136212	NA	GntR family transcriptional regulator, colanic acid and biofilm gene transcriptional regulator	K02092	0.000562808	NA	allophycocyanin alpha subunit
K07589	0.013513	NA	D-erythro-7,8-dihydroneopterin triphosphate epimerase [EC:5.1.99.7]	K19120	0.00056106	NA	CRISPR-associated protein Csc1
K09896	0.0134586	NA	uncharacterized protein	K21787	0.000548803	M00837	prodigiosin/undecylprodigiosin synthetase
K12143	0.0134293	NA	hydrogenase-4 component H	K02720	0.000540507	NA	photosystem II cytochrome c550
K08475	0.0134205	NA	two-component system, NtrC family, phosphoglycerate transport system sensor histidine kinase PgtB [EC:2.7.13.3]	K09744	0.000534851	NA	uncharacterized protein
K03757	0.0133972	NA	cadaverine:lysine antiporter	K15843	0.000508903	NA	outer membrane protein HopC/AlpA
K09685	0.0133787	NA	purine operon repressor	K21231	0.000503241	NA	3,8-divinyl protochlorophyllide a 8-vinyl-reductase (ferredoxin) [EC:1.3.7.13]
K14187	0.0133769	M00024	chorismate mutase / prephenate dehydrogenase [EC:5.4.99.5 1.3.1.12]	K02289	0.000500832	NA	phycocyanobilin lyase subunit beta [EC:4.4.1.32]
K14187	0.0133769	M00025	chorismate mutase / prephenate dehydrogenase [EC:5.4.99.5 1.3.1.12]	K14192	0.00049013	NA	clumping factor B
K19227	0.0133633	NA	cationic peptide transport system permease protein	K02723	0.000460008	NA	photosystem II PsbY protein
K06074	0.0133478	NA	vitamin B12 transport system ATP-binding protein [EC:7.6.2.8]	K11335	0.000452516	NA	3,8-divinyl chlorophyllide a/chlorophyllide a reductase subunit Z [EC:1.3.7.14 1.3.7.15]
K06866	0.0133091	NA	autonomous glycyl radical cofactor	K02284	0.000448065	NA	phycocyanin alpha chain
K05708	0.0131616	NA	3-phenylpropionate/trans-cinnamate dioxygenase subunit alpha [EC:1.14.12.19]	K03287	0.000443601	NA	outer membrane factor, OMF family
K02080	0.0131326	NA	galactosamine-6-phosphate isomerase [EC:5.3.1.-]	K15844	0.000399901	NA	outer membrane protein HopB/AlpB
K03482	0.0130272	NA	GntR family transcriptional regulator, glv operon transcriptional regulator	K02714	0.000395606	NA	photosystem II PsbM protein
K23546	0.0129978	NA	sugar transport system permease protein	K08928	0.000393823	M00597	photosynthetic reaction center L subunit
K14053	0.0129367	NA	outer membrane protein G	K12053	0.000383681	NA	ComB4 competence protein
[truncated: 40 more rows]

## Sheet: Supplementary File 1c
Genome ID	Database	Domain	Phylum	Class	Order	Family	Genus	Species
GCA_001071285.1_ASM107128v1_genomic.fna	gtdb	Bacteria	Proteobacteria	Gammaproteobacteria	Xanthomonadales	Xanthomonadaceae	Stenotrophomonas	Stenotrophomonas maltophilia
GCA_001222745.1_4976_1_10_genomic.fna	gtdb	Bacteria	Proteobacteria	Gammaproteobacteria	Enterobacterales	Yersiniaceae	Yersinia	Yersinia enterocolitica
GCA_001063375.1_ASM106337v1_genomic.fna	gtdb	Bacteria	Proteobacteria	Gammaproteobacteria	Enterobacterales	Yersiniaceae	Serratia	Serratia marcescens
GCA_001062925.1_ASM106292v1_genomic.fna	gtdb	Bacteria	Proteobacteria	Gammaproteobacteria	Enterobacterales	Yersiniaceae	Serratia	Serratia liquefaciens
GCA_001184545.1_ASM118454v1_genomic.fna	gtdb	Bacteria	Proteobacteria	Gammaproteobacteria	Pasteurellales	Pasteurellaceae	Haemophilus	Haemophilus influenzae
GCA_001123825.1_5139_2_1_genomic.fna	gtdb	Bacteria	Proteobacteria	Gammaproteobacteria	Enterobacterales	Yersiniaceae	Yersinia	Yersinia kristensenii
GCA_001125265.1_5139_3_8_genomic.fna	gtdb	Bacteria	Proteobacteria	Gammaproteobacteria	Enterobacterales	Yersiniaceae	Yersinia	Yersinia pseudotuberculosis
GCA_001182105.1_4976_7_10_genomic.fna	gtdb	Bacteria	Proteobacteria	Gammaproteobacteria	Enterobacterales	Yersiniaceae	Yersinia	Yersinia enterocolitica
GCA_001053555.1_ASM105355v1_genomic.fna	gtdb	Bacteria	Actinobacteria	Actinobacteria	Corynebacteriales	Corynebacteriaceae	Corynebacterium	Corynebacterium propinquum
GCA_001186365.1_ASM118636v1_genomic.fna	gtdb	Bacteria	Actinobacteria	Actinobacteria	Corynebacteriales	Gordoniaceae	Gordonia	Gordonia jacobaea
GCA_001174985.1_5749_7_3_genomic.fna	gtdb	Bacteria	Proteobacteria	Gammaproteobacteria	Enterobacterales	Yersiniaceae	Yersinia	Yersinia enterocolitica
GCA_001064405.1_ASM106440v1_genomic.fna	gtdb	Bacteria	Proteobacteria	Gammaproteobacteria	Pseudomonadales	Moraxellaceae	Moraxella	Moraxella canis
GCA_001059235.1_ASM105923v1_genomic.fna	gtdb	Bacteria	Actinobacteria	Actinobacteria	Micrococcales	Promicromonosporaceae	Isoptericola	Isoptericola variabilis
GCA_001067855.1_ASM106785v1_genomic.fna	gtdb	Bacteria	Actinobacteria	Actinobacteria	Micrococcales	Micrococcaceae	Rothia	Rothia mucilaginosa
GCA_001166625.1_4821_6_10_genomic.fna	gtdb	Bacteria	Proteobacteria	Gammaproteobacteria	Enterobacterales	Yersiniaceae	Yersinia	Yersinia intermedia
GCA_001076415.1_ASM107641v1_genomic.fna	gtdb	Bacteria	Proteobacteria	Betaproteobacteria	Burkholderiales	Alcaligenaceae	Oligella	Oligella urethralis
GCA_001160045.1_8016_2_85_genomic.fna	gtdb	Bacteria	Proteobacteria	Gammaproteobacteria	Enterobacterales	Yersiniaceae	Yersinia	Yersinia enterocolitica
GCA_001189595.1_ASM118959v1_genomic.fna	gtdb	Bacteria	Proteobacteria	Betaproteobacteria	Burkholderiales	Alcaligenaceae	Achromobacter	Achromobacter spanius
GCA_001189235.2_ASM118923v2_genomic.fna	gtdb	Bacteria	Proteobacteria	Alphaproteobacteria	Rhizobiales	Bradyrhizobiaceae	Bradyrhizobium	Bradyrhizobium embrapense
GCA_001223065.1_4976_2_7_genomic.fna	gtdb	Bacteria	Proteobacteria	Gammaproteobacteria	Enterobacterales	Yersiniaceae	Yersinia	Yersinia enterocolitica
GCA_001153365.1_5139_5_10_genomic.fna	gtdb	Bacteria	Proteobacteria	Gammaproteobacteria	Enterobacterales	Yersiniaceae	Yersinia	Yersinia kristensenii
GCA_001078335.1_B.canis_SCL_genomic.fna	gtdb	Bacteria	Proteobacteria	Alphaproteobacteria	Rhizobiales	Brucellaceae	Brucella	Brucella canis
GCA_001090225.1_8016_2_66_genomic.fna	gtdb	Bacteria	Proteobacteria	Gammaproteobacteria	Enterobacterales	Yersiniaceae	Yersinia	Yersinia enterocolitica
GCA_001249155.1_8489_2_85_genomic.fna	gtdb	Bacteria	Proteobacteria	Gammaproteobacteria	Enterobacterales	Enterobacteriaceae	Shigella	Shigella sonnei
GCA_001222425.1_4821_8_2_genomic.fna	gtdb	Bacteria	Proteobacteria	Gammaproteobacteria	Enterobacterales	Yersiniaceae	Yersinia	Yersinia intermedia
GCA_001089645.1_4821_6_9_genomic.fna	gtdb	Bacteria	Proteobacteria	Gammaproteobacteria	Enterobacterales	Yersiniaceae	Yersinia	Yersinia frederiksenii
GCA_001219745.1_4976_1_6_genomic.fna	gtdb	Bacteria	Proteobacteria	Gammaproteobacteria	Enterobacterales	Yersiniaceae	Yersinia	Yersinia enterocolitica
GCA_001244855.1_4840_7_12_genomic.fna	gtdb	Bacteria	Proteobacteria	Gammaproteobacteria	Enterobacterales	Yersiniaceae	Yersinia	Yersinia pseudotuberculosis
GCA_001065115.1_ASM106511v1_genomic.fna	gtdb	Bacteria	Actinobacteria	Actinobacteria	Micrococcales	Micrococcaceae	Rothia	Rothia mucilaginosa
GCA_001244995.1_Intestinimonas_massiliensis_genomic.fna	gtdb	Bacteria	Firmicutes	Clostridia	Clostridiales	NA	Intestinimonas	Intestinimonas massiliensis
GCA_001105265.1_8016_2_79_genomic.fna	gtdb	Bacteria	Proteobacteria	Gammaproteobacteria	Enterobacterales	Yersiniaceae	Yersinia	Yersinia enterocolitica
GCA_001217685.1_5103_7_4_genomic.fna	gtdb	Bacteria	Proteobacteria	Gammaproteobacteria	Enterobacterales	Yersiniaceae	Yersinia	Yersinia enterocolitica
GCA_001238615.1_ASM123861v1_genomic.fna	gtdb	Bacteria	Proteobacteria	Gammaproteobacteria	Enterobacterales	Erwiniaceae	Pantoea	Pantoea vagans
GCA_001123345.1_5139_1_6_genomic.fna	gtdb	Bacteria	Proteobacteria	Gammaproteobacteria	Enterobacterales	Yersiniaceae	Yersinia	Yersinia pseudotuberculosis
GCA_001077795.1_ASM107779v1_genomic.fna	gtdb	Bacteria	Bacteroidetes	Flavobacteriia	Flavobacteriales	Flavobacteriaceae	Riemerella	Riemerella anatipestifer
GCA_001072635.1_ASM107263v1_genomic.fna	gtdb	Bacteria	Proteobacteria	Gammaproteobacteria	Xanthomonadales	Xanthomonadaceae	Stenotrophomonas	Stenotrophomonas maltophilia
GCA_001222845.1_4840_8_10_genomic.fna	gtdb	Bacteria	Proteobacteria	Gammaproteobacteria	Enterobacterales	Yersiniaceae	Yersinia	Yersinia frederiksenii
GCA_001220485.1_5116_2_9_genomic.fna	gtdb	Bacteria	Proteobacteria	Gammaproteobacteria	Enterobacterales	Yersiniaceae	Yersinia	Yersinia enterocolitica
GCA_001063545.1_ASM106354v1_genomic.fna	gtdb	Bacteria	Actinobacteria	Actinobacteria	Micrococcales	Micrococcaceae	Rothia	Rothia mucilaginosa
GCA_001247995.1_8290_4_42_genomic.fna	gtdb	Bacteria	Proteobacteria	Gammaproteobacteria	Enterobacterales	Enterobacteriaceae	Shigella	Shigella sonnei
GCA_001219245.1_4976_6_2_genomic.fna	gtdb	Bacteria	Proteobacteria	Gammaproteobacteria	Enterobacterales	Yersiniaceae	Yersinia	Yersinia enterocolitica
GCA_001098625.1_5139_5_4_genomic.fna	gtdb	Bacteria	Proteobacteria	Gammaproteobacteria	Enterobacterales	Yersiniaceae	Yersinia	Yersinia frederiksenii
GCA_001167085.1_4821_8_7_genomic.fna	gtdb	Bacteria	Proteobacteria	Gammaproteobacteria	Enterobacterales	Yersiniaceae	Yersinia	Yersinia intermedia
GCA_001064855.1_ASM106485v1_genomic.fna	gtdb	Bacteria	Proteobacteria	Gammaproteobacteria	Enterobacterales	Yersiniaceae	Serratia	Serratia marcescens
GCA_001187845.1_ASM118784v1_genomic.fna	gtdb	Bacteria	Proteobacteria	Alphaproteobacteria	Rhodobacterales	Rhodobacteraceae	Octadecabacter	Octadecabacter temperatus
GCA_001112925.1_8016_2_91_genomic.fna	gtdb	Bacteria	Proteobacteria	Gammaproteobacteria	Enterobacterales	Yersiniaceae	Yersinia	Yersinia nurmii
GCA_001064975.1_ASM106497v1_genomic.fna	gtdb	Bacteria	Proteobacteria	Gammaproteobacteria	Enterobacterales	Yersiniaceae	Serratia	Serratia marcescens
GCA_001118285.1_4976_3_10_genomic.fna	gtdb	Bacteria	Proteobacteria	Gammaproteobacteria	Enterobacterales	Yersiniaceae	Yersinia	Yersinia enterocolitica
GCA_001174965.1_5749_7_1_genomic.fna	gtdb	Bacteria	Proteobacteria	Gammaproteobacteria	Enterobacterales	Yersiniaceae	Yersinia	Yersinia enterocolitica
GCA_001062815.1_ASM106281v1_genomic.fna	gtdb	Bacteria	Proteobacteria	Gammaproteobacteria	Pseudomonadales	Moraxellaceae	Moraxella	Moraxella catarrhalis
GCA_001056295.1_ASM105629v1_genomic.fna	gtdb	Bacteria	Actinobacteria	Actinobacteria	Corynebacteriales	Corynebacteriaceae	Corynebacterium	Corynebacterium halotolerans
GCA_001104045.1_4821_8_12_genomic.fna	gtdb	Bacteria	Proteobacteria	Gammaproteobacteria	Enterobacterales	Yersiniaceae	Yersinia	Yersinia pseudotuberculosis
GCA_001248805.1_5008_8_1_genomic.fna	gtdb	Bacteria	Proteobacteria	Gammaproteobacteria	Enterobacterales	Enterobacteriaceae	Shigella	Shigella sonnei
GCA_001064535.1_ASM106453v1_genomic.fna	gtdb	Bacteria	Proteobacteria	Gammaproteobacteria	Pseudomonadales	Moraxellaceae	Moraxella	Moraxella canis
GCA_001063195.1_ASM106319v1_genomic.fna	gtdb	Bacteria	Actinobacteria	Actinobacteria	Micrococcales	Microbacteriaceae	Leifsonia	Leifsonia xyli
GCA_001054325.1_ASM105432v1_genomic.fna	gtdb	Bacteria	Actinobacteria	Actinobacteria	Corynebacteriales	Corynebacteriaceae	Corynebacterium	Corynebacterium vitaeruminis
GCA_001106265.1_5116_3_10_genomic.fna	gtdb	Bacteria	Proteobacteria	Gammaproteobacteria	Enterobacterales	Yersiniaceae	Yersinia	Yersinia enterocolitica
GCA_001071065.1_ASM107106v1_genomic.fna	gtdb	Bacteria	Proteobacteria	Gammaproteobacteria	Xanthomonadales	Xanthomonadaceae	Stenotrophomonas	Stenotrophomonas maltophilia
GCA_001053795.1_ASM105379v1_genomic.fna	gtdb	Bacteria	Proteobacteria	Gammaproteobacteria	Pasteurellales	Pasteurellaceae	Haemophilus	Haemophilus influenzae
GCA_001065525.1_ASM106552v1_genomic.fna	gtdb	Bacteria	Proteobacteria	Betaproteobacteria	Burkholderiales	Burkholderiaceae	Ralstonia	Ralstonia solanacearum
GCA_001248405.1_6496_8_11_genomic.fna	gtdb	Bacteria	Proteobacteria	Gammaproteobacteria	Enterobacterales	Enterobacteriaceae	Shigella	Shigella sonnei
GCA_001249595.1_12971_8_38_genomic.fna	gtdb	Bacteria	Proteobacteria	Gammaproteobacteria	Enterobacterales	Enterobacteriaceae	Shigella	Shigella sonnei
GCA_001218165.1_4976_2_2_genomic.fna	gtdb	Bacteria	Proteobacteria	Gammaproteobacteria	Enterobacterales	Yersiniaceae	Yersinia	Yersinia enterocolitica
GCA_001188325.1_YPY_1_genomic.fna	gtdb	Bacteria	Proteobacteria	Gammaproteobacteria	Enterobacterales	Yersiniaceae	Yersinia	Yersinia pestis
GCA_001249535.1_8489_2_82_genomic.fna	gtdb	Bacteria	Proteobacteria	Gammaproteobacteria	Enterobacterales	Enterobacteriaceae	Shigella	Shigella sonnei
GCA_001084885.1_8016_2_75_genomic.fna	gtdb	Bacteria	Proteobacteria	Gammaproteobacteria	Enterobacterales	Yersiniaceae	Yersinia	Yersinia enterocolitica
GCA_001245775.1_8290_4_13_genomic.fna	gtdb	Bacteria	Proteobacteria	Gammaproteobacteria	Enterobacterales	Enterobacteriaceae	Shigella	Shigella sonnei
GCA_001065625.1_ASM106562v1_genomic.fna	gtdb	Bacteria	Proteobacteria	Gammaproteobacteria	Pseudomonadales	Moraxellaceae	Moraxella	Moraxella catarrhalis
GCA_001149865.1_4976_6_10_genomic.fna	gtdb	Bacteria	Proteobacteria	Gammaproteobacteria	Enterobacterales	Yersiniaceae	Yersinia	Yersinia enterocolitica
GCA_001064715.1_ASM106471v1_genomic.fna	gtdb	Bacteria	Proteobacteria	Gammaproteobacteria	Enterobacterales	Yersiniaceae	Serratia	Serratia marcescens
GCA_001187965.2_ASM118796v2_genomic.fna	gtdb	Bacteria	Proteobacteria	Gammaproteobacteria	Enterobacterales	Pectobacteriaceae	Dickeya	Dickeya fangzhongdai
GCA_001055315.1_ASM105531v1_genomic.fna	gtdb	Bacteria	Proteobacteria	Gammaproteobacteria	Enterobacterales	Enterobacteriaceae	Citrobacter	Citrobacter freundii
GCA_001097785.1_4840_7_8_genomic.fna	gtdb	Bacteria	Proteobacteria	Gammaproteobacteria	Enterobacterales	Yersiniaceae	Yersinia	Yersinia enterocolitica
GCA_001157485.1_4821_6_3_genomic.fna	gtdb	Bacteria	Proteobacteria	Gammaproteobacteria	Enterobacterales	Yersiniaceae	Yersinia	Yersinia frederiksenii
GCA_001071655.1_ASM107165v1_genomic.fna	gtdb	Bacteria	Proteobacteria	Gammaproteobacteria	Xanthomonadales	Xanthomonadaceae	Stenotrophomonas	Stenotrophomonas maltophilia
GCA_001136465.1_5139_2_7_genomic.fna	gtdb	Bacteria	Proteobacteria	Gammaproteobacteria	Enterobacterales	Yersiniaceae	Yersinia	Yersinia pseudotuberculosis
GCA_001184135.1_ASM118413v1_genomic.fna	gtdb	Bacteria	Proteobacteria	Gammaproteobacteria	Enterobacterales	Enterobacteriaceae	Shigella	Shigella sonnei
GCA_001063325.1_ASM106332v1_genomic.fna	gtdb	Bacteria	Proteobacteria	Gammaproteobacteria	Enterobacterales	Yersiniaceae	Serratia	Serratia marcescens
GCA_001202045.1_ASM120204v1_genomic.fna	gtdb	Bacteria	Proteobacteria	Alphaproteobacteria	Rhodobacterales	Rhodobacteraceae	Pseudorhodobacter	Pseudorhodobacter ferrugineus
GCA_001072535.1_ASM107253v1_genomic.fna	gtdb	Bacteria	Proteobacteria	Gammaproteobacteria	Xanthomonadales	Xanthomonadaceae	Stenotrophomonas	Stenotrophomonas maltophilia
GCA_001151605.1_4976_7_8_genomic.fna	gtdb	Bacteria	Proteobacteria	Gammaproteobacteria	Enterobacterales	Yersiniaceae	Yersinia	Yersinia enterocolitica
GCA_001247155.1_6350_1_16_genomic.fna	gtdb	Bacteria	Proteobacteria	Gammaproteobacteria	Enterobacterales	Enterobacteriaceae	Shigella	Shigella sonnei
GCA_001071815.1_ASM107181v1_genomic.fna	gtdb	Bacteria	Proteobacteria	Gammaproteobacteria	Xanthomonadales	Xanthomonadaceae	Stenotrophomonas	Stenotrophomonas maltophilia
GCA_001187975.2_ASM118797v2_genomic.fna	gtdb	Bacteria	Proteobacteria	Gammaproteobacteria	Enterobacterales	Pectobacteriaceae	Dickeya	Dickeya fangzhongdai
GCA_001249475.1_6246_5_5_genomic.fna	gtdb	Bacteria	Proteobacteria	Gammaproteobacteria	Enterobacterales	Enterobacteriaceae	Shigella	Shigella sonnei
GCA_001120245.1_4976_3_9_genomic.fna	gtdb	Bacteria	Proteobacteria	Gammaproteobacteria	Enterobacterales	Yersiniaceae	Yersinia	Yersinia enterocolitica
GCA_001087205.1_5116_2_3_genomic.fna	gtdb	Bacteria	Proteobacteria	Gammaproteobacteria	Enterobacterales	Yersiniaceae	Yersinia	Yersinia enterocolitica
GCA_001147045.1_4821_5_5_genomic.fna	gtdb	Bacteria	Proteobacteria	Gammaproteobacteria	Enterobacterales	Yersiniaceae	Yersinia	Yersinia frederiksenii
GCA_001249255.1_11822_8_61_genomic.fna	gtdb	Bacteria	Proteobacteria	Gammaproteobacteria	Enterobacterales	Enterobacteriaceae	Shigella	Shigella sonnei
GCA_001248925.1_5236_3_12_genomic.fna	gtdb	Bacteria	Proteobacteria	Gammaproteobacteria	Enterobacterales	Enterobacteriaceae	Shigella	Shigella sonnei
GCA_001086525.1_4976_6_7_genomic.fna	gtdb	Bacteria	Proteobacteria	Gammaproteobacteria	Enterobacterales	Yersiniaceae	Yersinia	Yersinia enterocolitica
GCA_001248765.1_12971_8_40_genomic.fna	gtdb	Bacteria	Proteobacteria	Gammaproteobacteria	Enterobacterales	Enterobacteriaceae	Shigella	Shigella sonnei
GCA_001244565.1_5139_2_5_genomic.fna	gtdb	Bacteria	Proteobacteria	Gammaproteobacteria	Enterobacterales	Yersiniaceae	Yersinia	Yersinia intermedia
GCA_001085265.1_5103_7_7_genomic.fna	gtdb	Bacteria	Proteobacteria	Gammaproteobacteria	Enterobacterales	Yersiniaceae	Yersinia	Yersinia enterocolitica
GCA_001063455.1_ASM106345v1_genomic.fna	gtdb	Bacteria	Proteobacteria	Betaproteobacteria	Neisseriales	Neisseriaceae	Morococcus	Morococcus cerebrosus
GCA_001248965.1_5417_1_11_genomic.fna	gtdb	Bacteria	Proteobacteria	Gammaproteobacteria	Enterobacterales	Enterobacteriaceae	Shigella	Shigella sonnei
GCA_001063605.1_ASM106360v1_genomic.fna	gtdb	Bacteria	Actinobacteria	Actinobacteria	Propionibacteriales	Propionibacteriaceae	Cutibacterium	Cutibacterium acnes
GCA_001184535.1_ASM118453v1_genomic.fna	gtdb	Bacteria	Proteobacteria	Gammaproteobacteria	Pasteurellales	Pasteurellaceae	Haemophilus	Haemophilus influenzae
GCA_001144105.1_5139_2_8_genomic.fna	gtdb	Bacteria	Proteobacteria	Gammaproteobacteria	Enterobacterales	Yersiniaceae	Yersinia	Yersinia pseudotuberculosis
GCA_001078375.1_ASM107837v1_genomic.fna	gtdb	Bacteria	Firmicutes	Negativicutes	Veillonellales	Veillonellaceae	Veillonella	Veillonella tobetsuensis
GCA_001184265.1_ASM118426v1_genomic.fna	gtdb	Bacteria	Firmicutes	Bacilli	Lactobacillales	Leuconostocaceae	Leuconostoc	Leuconostoc mesenteroides
GCA_001115185.1_5139_3_1_genomic.fna	gtdb	Bacteria	Proteobacteria	Gammaproteobacteria	Enterobacterales	Yersiniaceae	Yersinia	Yersinia kristensenii
GCA_001217565.1_4976_1_4_genomic.fna	gtdb	Bacteria	Proteobacteria	Gammaproteobacteria	Enterobacterales	Yersiniaceae	Yersinia	Yersinia enterocolitica
GCA_001064185.1_ASM106418v1_genomic.fna	gtdb	Bacteria	Actinobacteria	Actinobacteria	Micrococcales	Dermacoccaceae	Kytococcus	Kytococcus sedentarius
GCA_001064265.1_ASM106426v1_genomic.fna	gtdb	Bacteria	Actinobacteria	Actinobacteria	Micrococcales	Micrococcaceae	Rothia	Rothia mucilaginosa
GCA_001062635.1_ASM106263v1_genomic.fna	gtdb	Bacteria	Firmicutes	Bacilli	Lactobacillales	Leuconostocaceae	Leuconostoc	Leuconostoc citreum
GCA_001158365.1_5139_5_1_genomic.fna	gtdb	Bacteria	Proteobacteria	Gammaproteobacteria	Enterobacterales	Yersiniaceae	Yersinia	Yersinia frederiksenii
GCA_001151185.1_4821_8_8_genomic.fna	gtdb	Bacteria	Proteobacteria	Gammaproteobacteria	Enterobacterales	Yersiniaceae	Yersinia	Yersinia frederiksenii
GCA_001069615.1_ASM106961v1_genomic.fna	gtdb	Bacteria	Proteobacteria	Gammaproteobacteria	Xanthomonadales	Xanthomonadaceae	Stenotrophomonas	Stenotrophomonas maltophilia
GCA_001058435.1_ASM105843v1_genomic.fna	gtdb	Bacteria	Proteobacteria	Gammaproteobacteria	Pasteurellales	Pasteurellaceae	Haemophilus	Haemophilus parainfluenzae
GCA_001246455.1_12971_8_24_genomic.fna	gtdb	Bacteria	Proteobacteria	Gammaproteobacteria	Enterobacterales	Enterobacteriaceae	Shigella	Shigella sonnei
GCA_001055565.1_ASM105556v1_genomic.fna	gtdb	Bacteria	Proteobacteria	Gammaproteobacteria	Pasteurellales	Pasteurellaceae	Haemophilus	Haemophilus influenzae
GCA_001182185.1_4976_7_1_genomic.fna	gtdb	Bacteria	Proteobacteria	Gammaproteobacteria	Enterobacterales	Yersiniaceae	Yersinia	Yersinia enterocolitica
GCA_001116865.1_4840_6_5_genomic.fna	gtdb	Bacteria	Proteobacteria	Gammaproteobacteria	Enterobacterales	Yersiniaceae	Yersinia	Yersinia intermedia
GCA_001248605.1_8489_2_90_genomic.fna	gtdb	Bacteria	Proteobacteria	Gammaproteobacteria	Enterobacterales	Enterobacteriaceae	Shigella	Shigella sonnei
GCA_001107025.1_8016_2_72_genomic.fna	gtdb	Bacteria	Proteobacteria	Gammaproteobacteria	Enterobacterales	Yersiniaceae	Yersinia	Yersinia enterocolitica
GCA_001219325.1_4976_1_7_genomic.fna	gtdb	Bacteria	Proteobacteria	Gammaproteobacteria	Enterobacterales	Yersiniaceae	Yersinia	Yersinia enterocolitica
GCA_001060545.1_ASM106054v1_genomic.fna	gtdb	Bacteria	Actinobacteria	Actinobacteria	Micrococcales	Micrococcaceae	Rothia	Rothia mucilaginosa
GCA_001189965.1_ASM118996v1_genomic.fna	gtdb	Bacteria	Proteobacteria	Betaproteobacteria	Burkholderiales	Oxalobacteraceae	Herbaspirillum	Herbaspirillum rhizosphaerae
GCA_001246675.1_6551_1_10_genomic.fna	gtdb	Bacteria	Proteobacteria	Gammaproteobacteria	Enterobacterales	Enterobacteriaceae	Shigella	Shigella sonnei
GCA_001245885.1_8290_4_91_genomic.fna	gtdb	Bacteria	Proteobacteria	Gammaproteobacteria	Enterobacterales	Enterobacteriaceae	Shigella	Shigella sonnei
GCA_001056575.1_ASM105657v1_genomic.fna	gtdb	Bacteria	Proteobacteria	Gammaproteobacteria	Pasteurellales	Pasteurellaceae	Haemophilus	Haemophilus influenzae
GCA_001246155.1_8290_4_93_genomic.fna	gtdb	Bacteria	Proteobacteria	Gammaproteobacteria	Enterobacterales	Enterobacteriaceae	Shigella	Shigella sonnei
GCA_001076835.1_ASM107683v1_genomic.fna	gtdb	Bacteria	Proteobacteria	Gammaproteobacteria	Pasteurellales	Pasteurellaceae	Haemophilus	Haemophilus influenzae
GCA_001124705.1_8016_2_74_genomic.fna	gtdb	Bacteria	Proteobacteria	Gammaproteobacteria	Enterobacterales	Yersiniaceae	Yersinia	Yersinia enterocolitica
GCA_001184475.1_ASM118447v1_genomic.fna	gtdb	Bacteria	Proteobacteria	Gammaproteobacteria	Pasteurellales	Pasteurellaceae	Haemophilus	Haemophilus influenzae
GCA_001249375.1_9870_6_31_genomic.fna	gtdb	Bacteria	Proteobacteria	Gammaproteobacteria	Enterobacterales	Enterobacteriaceae	Shigella	Shigella sonnei
GCA_001188675.1_ASM118867v1_genomic.fna	gtdb	Bacteria	Proteobacteria	Gammaproteobacteria	Enterobacterales	Yersiniaceae	Yersinia	Yersinia pestis
GCA_001052555.1_ASM105255v1_genomic.fna	gtdb	Bacteria	Actinobacteria	Actinobacteria	Corynebacteriales	Corynebacteriaceae	Corynebacterium	Corynebacterium propinquum
GCA_001140625.1_5139_1_11_genomic.fna	gtdb	Bacteria	Proteobacteria	Gammaproteobacteria	Enterobacterales	Yersiniaceae	Yersinia	Yersinia pseudotuberculosis
GCA_001218905.1_5116_2_2_genomic.fna	gtdb	Bacteria	Proteobacteria	Gammaproteobacteria	Enterobacterales	Yersiniaceae	Yersinia	Yersinia enterocolitica
GCA_001134585.1_4821_5_7_genomic.fna	gtdb	Bacteria	Proteobacteria	Gammaproteobacteria	Enterobacterales	Yersiniaceae	Yersinia	Yersinia kristensenii
GCA_001157205.1_5139_3_9_genomic.fna	gtdb	Bacteria	Proteobacteria	Gammaproteobacteria	Enterobacterales	Yersiniaceae	Yersinia	Yersinia pseudotuberculosis
GCA_001246015.1_5417_1_1_genomic.fna	gtdb	Bacteria	Proteobacteria	Gammaproteobacteria	Enterobacterales	Enterobacteriaceae	Shigella	Shigella sonnei
GCA_001150985.1_5139_2_3_genomic.fna	gtdb	Bacteria	Proteobacteria	Gammaproteobacteria	Enterobacterales	Yersiniaceae	Yersinia	Yersinia pseudotuberculosis
GCA_001053915.1_ASM105391v1_genomic.fna	gtdb	Bacteria	Proteobacteria	Gammaproteobacteria	Pasteurellales	Pasteurellaceae	Haemophilus	Haemophilus parainfluenzae
GCA_001249655.1_8289_7_60_genomic.fna	gtdb	Bacteria	Proteobacteria	Gammaproteobacteria	Enterobacterales	Enterobacteriaceae	Shigella	Shigella sonnei
GCA_001217805.1_4840_8_6_genomic.fna	gtdb	Bacteria	Proteobacteria	Gammaproteobacteria	Enterobacterales	Yersiniaceae	Yersinia	Yersinia rohdei
GCA_001222985.1_4976_2_5_genomic.fna	gtdb	Bacteria	Proteobacteria	Gammaproteobacteria	Enterobacterales	Yersiniaceae	Yersinia	Yersinia enterocolitica
GCA_001102185.1_4976_6_1_genomic.fna	gtdb	Bacteria	Proteobacteria	Gammaproteobacteria	Enterobacterales	Yersiniaceae	Yersinia	Yersinia enterocolitica
GCA_001249415.1_9870_6_40_genomic.fna	gtdb	Bacteria	Proteobacteria	Gammaproteobacteria	Enterobacterales	Enterobacteriaceae	Shigella	Shigella sonnei
GCA_001055885.1_ASM105588v1_genomic.fna	gtdb	Bacteria	Proteobacteria	Gammaproteobacteria	Pasteurellales	Pasteurellaceae	Haemophilus	Haemophilus parainfluenzae
GCA_001056285.1_ASM105628v1_genomic.fna	gtdb	Bacteria	Proteobacteria	Betaproteobacteria	Burkholderiales	Alcaligenaceae	Oligella	Oligella urethralis
GCA_001218185.1_4821_8_1_genomic.fna	gtdb	Bacteria	Proteobacteria	Gammaproteobacteria	Enterobacterales	Yersiniaceae	Yersinia	Yersinia frederiksenii
GCA_001059185.1_ASM105918v1_genomic.fna	gtdb	Bacteria	Proteobacteria	Gammaproteobacteria	Pasteurellales	Pasteurellaceae	Haemophilus	Haemophilus influenzae
GCA_001136265.1_4840_6_6_genomic.fna	gtdb	Bacteria	Proteobacteria	Gammaproteobacteria	Enterobacterales	Yersiniaceae	Yersinia	Yersinia enterocolitica
GCA_001054395.1_ASM105439v1_genomic.fna	gtdb	Bacteria	Actinobacteria	Actinobacteria	Corynebacteriales	Corynebacteriaceae	Corynebacterium	Corynebacterium propinquum
GCA_001247045.1_Sg_201311953_TACAGC_L001_genomic.fna	gtdb	Bacteria	Proteobacteria	Gammaproteobacteria	Enterobacterales	Enterobacteriaceae	Shigella	Shigella sonnei
GCA_001144805.1_4821_5_12_genomic.fna	gtdb	Bacteria	Proteobacteria	Gammaproteobacteria	Enterobacterales	Yersiniaceae	Yersinia	Yersinia kristensenii
GCA_001171065.1_4840_6_7_genomic.fna	gtdb	Bacteria	Proteobacteria	Gammaproteobacteria	Enterobacterales	Yersiniaceae	Yersinia	Yersinia frederiksenii
GCA_001072465.1_ASM107246v1_genomic.fna	gtdb	Bacteria	Actinobacteria	Actinobacteria	Micrococcales	Promicromonosporaceae	Xylanimonas	Xylanimonas cellulosilytica
GCA_001174945.1_5749_7_5_genomic.fna	gtdb	Bacteria	Proteobacteria	Gammaproteobacteria	Enterobacterales	Yersiniaceae	Yersinia	Yersinia enterocolitica
GCA_001061665.1_ASM106166v1_genomic.fna	gtdb	Bacteria	Actinobacteria	Actinobacteria	Micrococcales	Micrococcaceae	Rothia	Rothia mucilaginosa
GCA_001218045.1_4821_8_5_genomic.fna	gtdb	Bacteria	Proteobacteria	Gammaproteobacteria	Enterobacterales	Yersiniaceae	Yersinia	Yersinia intermedia
GCA_001223385.1_4821_7_2_genomic.fna	gtdb	Bacteria	Proteobacteria	Gammaproteobacteria	Enterobacterales	Yersiniaceae	Yersinia	Yersinia rohdei
GCA_001064335.1_ASM106433v1_genomic.fna	gtdb	Bacteria	Proteobacteria	Gammaproteobacteria	Enterobacterales	Yersiniaceae	Serratia	Serratia marcescens
GCA_001068915.1_ASM106891v1_genomic.fna	gtdb	Bacteria	Proteobacteria	Gammaproteobacteria	Xanthomonadales	Xanthomonadaceae	Stenotrophomonas	Stenotrophomonas maltophilia
GCA_001085865.1_4821_5_6_genomic.fna	gtdb	Bacteria	Proteobacteria	Gammaproteobacteria	Enterobacterales	Yersiniaceae	Yersinia	Yersinia kristensenii
GCA_001071045.1_ASM107104v1_genomic.fna	gtdb	Bacteria	Proteobacteria	Gammaproteobacteria	Xanthomonadales	Xanthomonadaceae	Stenotrophomonas	Stenotrophomonas maltophilia
GCA_001248485.1_5417_1_6_genomic.fna	gtdb	Bacteria	Proteobacteria	Gammaproteobacteria	Enterobacterales	Enterobacteriaceae	Shigella	Shigella sonnei
GCA_001246975.1_9870_6_25_genomic.fna	gtdb	Bacteria	Proteobacteria	Gammaproteobacteria	Enterobacterales	Enterobacteriaceae	Shigella	Shigella sonnei
GCA_001061655.1_ASM106165v1_genomic.fna	gtdb	Bacteria	Actinobacteria	Actinobacteria	Micrococcales	Micrococcaceae	Rothia	Rothia mucilaginosa
GCA_001076975.1_ASM107697v1_genomic.fna	gtdb	Bacteria	Actinobacteria	Actinobacteria	Corynebacteriales	Corynebacteriaceae	Corynebacterium	Corynebacterium striatum
GCA_001248275.1_12971_8_29_genomic.fna	gtdb	Bacteria	Proteobacteria	Gammaproteobacteria	Enterobacterales	Enterobacteriaceae	Shigella	Shigella sonnei
GCA_001248885.1_12971_8_64_genomic.fna	gtdb	Bacteria	Proteobacteria	Gammaproteobacteria	Enterobacterales	Enterobacteriaceae	Shigella	Shigella sonnei
GCA_001059425.1_ASM105942v1_genomic.fna	gtdb	Bacteria	Proteobacteria	Gammaproteobacteria	Pasteurellales	Pasteurellaceae	Aggregatibacter	Aggregatibacter segnis
GCA_001184145.1_ASM118414v1_genomic.fna	gtdb	Bacteria	Proteobacteria	Gammaproteobacteria	Enterobacterales	Enterobacteriaceae	Shigella	Shigella flexneri
GCA_001202035.1_ASM120203v1_genomic.fna	gtdb	Bacteria	Proteobacteria	Alphaproteobacteria	Rhodobacterales	Rhodobacteraceae	Pseudorhodobacter	Pseudorhodobacter wandonensis
GCA_001061885.1_ASM106188v1_genomic.fna	gtdb	Bacteria	Actinobacteria	Actinobacteria	Micrococcales	Dermacoccaceae	Kytococcus	Kytococcus sedentarius
GCA_001066935.1_ASM106693v1_genomic.fna	gtdb	Bacteria	Actinobacteria	Actinobacteria	Micrococcales	Micrococcaceae	Rothia	Rothia dentocariosa
GCA_001102905.1_4976_7_9_genomic.fna	gtdb	Bacteria	Proteobacteria	Gammaproteobacteria	Enterobacterales	Yersiniaceae	Yersinia	Yersinia enterocolitica
GCA_001249295.1_Sg_201400049_GCCAAT_L001_genomic.fna	gtdb	Bacteria	Proteobacteria	Gammaproteobacteria	Enterobacterales	Enterobacteriaceae	Shigella	Shigella sonnei
GCA_001249635.1_5236_2_9_genomic.fna	gtdb	Bacteria	Proteobacteria	Gammaproteobacteria	Enterobacterales	Enterobacteriaceae	Shigella	Shigella sonnei
GCA_001248525.1_Sg_201400893_GGCTAC_L001_genomic.fna	gtdb	Bacteria	Proteobacteria	Gammaproteobacteria	Enterobacterales	Enterobacteriaceae	Shigella	Shigella sonnei
GCA_001091065.1_4821_5_4_genomic.fna	gtdb	Bacteria	Proteobacteria	Gammaproteobacteria	Enterobacterales	Yersiniaceae	Yersinia	Yersinia kristensenii
GCA_001064745.1_ASM106474v1_genomic.fna	gtdb	Bacteria	Proteobacteria	Betaproteobacteria	Neisseriales	Neisseriaceae	Morococcus	Morococcus cerebrosus
GCA_001055195.1_ASM105519v1_genomic.fna	gtdb	Bacteria	Proteobacteria	Gammaproteobacteria	Aeromonadales	Aeromonadaceae	Aeromonas	Aeromonas hydrophila
GCA_001076115.1_ASM107611v1_genomic.fna	gtdb	Bacteria	Proteobacteria	Gammaproteobacteria	Pasteurellales	Pasteurellaceae	Haemophilus	Haemophilus influenzae
GCA_001149645.1_4821_8_10_genomic.fna	gtdb	Bacteria	Proteobacteria	Gammaproteobacteria	Enterobacterales	Yersiniaceae	Yersinia	Yersinia mollaretii
GCA_001248545.1_6551_1_12_genomic.fna	gtdb	Bacteria	Proteobacteria	Gammaproteobacteria	Enterobacterales	Enterobacteriaceae	Shigella	Shigella sonnei
GCA_001249175.1_5236_3_7_genomic.fna	gtdb	Bacteria	Proteobacteria	Gammaproteobacteria	Enterobacterales	Enterobacteriaceae	Shigella	Shigella sonnei
GCA_001063995.1_ASM106399v1_genomic.fna	gtdb	Bacteria	Actinobacteria	Actinobacteria	Micrococcales	Micrococcaceae	Rothia	Rothia mucilaginosa
GCA_001055095.1_ASM105509v1_genomic.fna	gtdb	Bacteria	Proteobacteria	Gammaproteobacteria	Pasteurellales	Pasteurellaceae	Haemophilus	Haemophilus parainfluenzae
GCA_001172905.1_4840_7_5_genomic.fna	gtdb	Bacteria	Proteobacteria	Gammaproteobacteria	Enterobacterales	Yersiniaceae	Yersinia	Yersinia ruckeri
GCA_001184075.1_ASM118407v1_genomic.fna	gtdb	Bacteria	Proteobacteria	Gammaproteobacteria	Enterobacterales	Enterobacteriaceae	Shigella	Shigella flexneri
GCA_001189245.1_ASM118924v1_genomic.fna	gtdb	Bacteria	Proteobacteria	Alphaproteobacteria	Rhizobiales	Bradyrhizobiaceae	Bradyrhizobium	Bradyrhizobium pachyrhizi
GCA_001244635.1_8016_2_92_genomic.fna	gtdb	Bacteria	Proteobacteria	Gammaproteobacteria	Enterobacterales	Yersiniaceae	Yersinia	Yersinia pekkanenii
GCA_001219625.1_4976_2_8_genomic.fna	gtdb	Bacteria	Proteobacteria	Gammaproteobacteria	Enterobacterales	Yersiniaceae	Yersinia	Yersinia enterocolitica
GCA_001135745.1_8016_2_62_genomic.fna	gtdb	Bacteria	Proteobacteria	Gammaproteobacteria	Enterobacterales	Yersiniaceae	Yersinia	Yersinia enterocolitica
GCA_001103745.1_4976_7_7_genomic.fna	gtdb	Bacteria	Proteobacteria	Gammaproteobacteria	Enterobacterales	Yersiniaceae	Yersinia	Yersinia enterocolitica
GCA_001221145.1_4976_2_10_genomic.fna	gtdb	Bacteria	Proteobacteria	Gammaproteobacteria	Enterobacterales	Yersiniaceae	Yersinia	Yersinia enterocolitica
GCA_001220805.1_5139_3_4_genomic.fna	gtdb	Bacteria	Proteobacteria	Gammaproteobacteria	Enterobacterales	Yersiniaceae	Yersinia	Yersinia pseudotuberculosis
GCA_001220745.1_4976_2_3_genomic.fna	gtdb	Bacteria	Proteobacteria	Gammaproteobacteria	Enterobacterales	Yersiniaceae	Yersinia	Yersinia enterocolitica
GCA_001188335.1_DYA_1_genomic.fna	gtdb	Bacteria	Proteobacteria	Gammaproteobacteria	Enterobacterales	Yersiniaceae	Yersinia	Yersinia pestis
GCA_001218645.1_4821_7_4_genomic.fna	gtdb	Bacteria	Proteobacteria	Gammaproteobacteria	Enterobacterales	Yersiniaceae	Yersinia	Yersinia mollaretii
GCA_001147425.1_4821_5_9_genomic.fna	gtdb	Bacteria	Proteobacteria	Gammaproteobacteria	Enterobacterales	Yersiniaceae	Yersinia	Yersinia frederiksenii
GCA_001249555.1_Sg_201401054_AGTCAA_L001_genomic.fna	gtdb	Bacteria	Proteobacteria	Gammaproteobacteria	Enterobacterales	Enterobacteriaceae	Shigella	Shigella sonnei
GCA_001069405.1_ASM106940v1_genomic.fna	gtdb	Bacteria	Proteobacteria	Gammaproteobacteria	Xanthomonadales	Xanthomonadaceae	Stenotrophomonas	Stenotrophomonas maltophilia
GCA_001220845.1_4840_8_8_genomic.fna	gtdb	Bacteria	Proteobacteria	Gammaproteobacteria	Enterobacterales	Yersiniaceae	Yersinia	Yersinia mollaretii
GCA_001184485.1_ASM118448v1_genomic.fna	gtdb	Bacteria	Proteobacteria	Gammaproteobacteria	Pasteurellales	Pasteurellaceae	Haemophilus	Haemophilus influenzae
GCA_001058525.1_ASM105852v1_genomic.fna	gtdb	Bacteria	Actinobacteria	Actinobacteria	Corynebacteriales	Corynebacteriaceae	Corynebacterium	Corynebacterium jeikeium
GCA_001221865.1_5116_2_11_genomic.fna	gtdb	Bacteria	Proteobacteria	Gammaproteobacteria	Enterobacterales	Yersiniaceae	Yersinia	Yersinia enterocolitica
GCA_001071195.1_ASM107119v1_genomic.fna	gtdb	Bacteria	Proteobacteria	Gammaproteobacteria	Xanthomonadales	Xanthomonadaceae	Stenotrophomonas	Stenotrophomonas maltophilia
GCA_001221165.1_4821_7_8_genomic.fna	gtdb	Bacteria	Proteobacteria	Gammaproteobacteria	Enterobacterales	Yersiniaceae	Yersinia	Yersinia intermedia
GCA_001222445.1_4976_6_3_genomic.fna	gtdb	Bacteria	Proteobacteria	Gammaproteobacteria	Enterobacterales	Yersiniaceae	Yersinia	Yersinia enterocolitica
GCA_001249135.1_8289_7_88_genomic.fna	gtdb	Bacteria	Proteobacteria	Gammaproteobacteria	Enterobacterales	Enterobacteriaceae	Shigella	Shigella sonnei
GCA_001155565.1_4840_6_2_genomic.fna	gtdb	Bacteria	Proteobacteria	Gammaproteobacteria	Enterobacterales	Yersiniaceae	Yersinia	Yersinia frederiksenii
GCA_001152565.1_4821_6_12_genomic.fna	gtdb	Bacteria	Proteobacteria	Gammaproteobacteria	Enterobacterales	Yersiniaceae	Yersinia	Yersinia pekkanenii
GCA_001248155.1_12971_8_75_genomic.fna	gtdb	Bacteria	Proteobacteria	Gammaproteobacteria	Enterobacterales	Enterobacteriaceae	Shigella	Shigella sonnei
GCA_001136125.1_5139_3_10_genomic.fna	gtdb	Bacteria	Proteobacteria	Gammaproteobacteria	Enterobacterales	Yersiniaceae	Yersinia	Yersinia pseudotuberculosis
GCA_001249005.1_7655_8_14_genomic.fna	gtdb	Bacteria	Proteobacteria	Gammaproteobacteria	Enterobacterales	Enterobacteriaceae	Shigella	Shigella sonnei
GCA_001182365.1_8016_2_77_genomic.fna	gtdb	Bacteria	Proteobacteria	Gammaproteobacteria	Enterobacterales	Yersiniaceae	Yersinia	Yersinia enterocolitica
GCA_001186445.1_ASM118644v1_genomic.fna	gtdb	Bacteria	Actinobacteria	Actinobacteria	Corynebacteriales	Corynebacteriaceae	Corynebacterium	Corynebacterium pseudotuberculosis
GCA_001125285.1_5116_3_4_genomic.fna	gtdb	Bacteria	Proteobacteria	Gammaproteobacteria	Enterobacterales	Yersiniaceae	Yersinia	Yersinia enterocolitica
GCA_001218005.1_5103_7_11_genomic.fna	gtdb	Bacteria	Proteobacteria	Gammaproteobacteria	Enterobacterales	Yersiniaceae	Yersinia	Yersinia enterocolitica
GCA_001220565.1_5103_7_10_genomic.fna	gtdb	Bacteria	Proteobacteria	Gammaproteobacteria	Enterobacterales	Yersiniaceae	Yersinia	Yersinia enterocolitica
GCA_001063175.1_ASM106317v1_genomic.fna	gtdb	Bacteria	Proteobacteria	Gammaproteobacteria	Enterobacterales	Yersiniaceae	Serratia	Serratia marcescens
GCA_001188735.1_ASM118873v1_genomic.fna	gtdb	Bacteria	Proteobacteria	Gammaproteobacteria	Enterobacterales	Yersiniaceae	Yersinia	Yersinia pestis
GCA_001057275.1_ASM105727v1_genomic.fna	gtdb	Bacteria	Proteobacteria	Gammaproteobacteria	Aeromonadales	Aeromonadaceae	Aeromonas	Aeromonas hydrophila
GCA_001069645.1_ASM106964v1_genomic.fna	gtdb	Bacteria	Proteobacteria	Gammaproteobacteria	Xanthomonadales	Xanthomonadaceae	Stenotrophomonas	Stenotrophomonas maltophilia
GCA_001051115.1_ASM105111v1_genomic.fna	gtdb	Bacteria	Bacteroidetes	Flavobacteriia	Flavobacteriales	Flavobacteriaceae	Riemerella	Riemerella anatipestifer
GCA_001127065.1_5139_5_7_genomic.fna	gtdb	Bacteria	Proteobacteria	Gammaproteobacteria	Enterobacterales	Yersiniaceae	Yersinia	Yersinia mollaretii
GCA_001072195.1_ASM107219v1_genomic.fna	gtdb	Bacteria	Proteobacteria	Gammaproteobacteria	Xanthomonadales	Xanthomonadaceae	Stenotrophomonas	Stenotrophomonas maltophilia
GCA_001249575.1_8289_7_94_genomic.fna	gtdb	Bacteria	Proteobacteria	Gammaproteobacteria	Enterobacterales	Enterobacteriaceae	Shigella	Shigella sonnei
GCA_001110725.1_5139_3_3_genomic.fna	gtdb	Bacteria	Proteobacteria	Gammaproteobacteria	Enterobacterales	Yersiniaceae	Yersinia	Yersinia pseudotuberculosis
GCA_001073225.1_ASM107322v1_genomic.fna	gtdb	Bacteria	Proteobacteria	Gammaproteobacteria	Xanthomonadales	Xanthomonadaceae	Stenotrophomonas	Stenotrophomonas maltophilia
GCA_001249275.1_Sg_201312374_TCATTC_L001_genomic.fna	gtdb	Bacteria	Proteobacteria	Gammaproteobacteria	Enterobacterales	Enterobacteriaceae	Shigella	Shigella sonnei
GCA_001064675.1_ASM106467v1_genomic.fna	gtdb	Bacteria	Proteobacteria	Gammaproteobacteria	Enterobacterales	Enterobacteriaceae	Shigella	Shigella boydii
GCA_001083805.1_ASM108380v1_genomic.fna	gtdb	Bacteria	Proteobacteria	Gammaproteobacteria	Enterobacterales	Morganellaceae	Photorhabdus	Photorhabdus luminescens
GCA_001172325.1_5139_3_2_genomic.fna	gtdb	Bacteria	Proteobacteria	Gammaproteobacteria	Enterobacterales	Yersiniaceae	Yersinia	Yersinia pseudotuberculosis
GCA_001064485.1_ASM106448v1_genomic.fna	gtdb	Bacteria	Actinobacteria	Actinobacteria	Micrococcales	Micrococcaceae	Rothia	Rothia dentocariosa
GCA_001218705.1_4976_1_9_genomic.fna	gtdb	Bacteria	Proteobacteria	Gammaproteobacteria	Enterobacterales	Yersiniaceae	Yersinia	Yersinia enterocolitica
GCA_001131685.1_5139_5_11_genomic.fna	gtdb	Bacteria	Proteobacteria	Gammaproteobacteria	Enterobacterales	Yersiniaceae	Yersinia	Yersinia bercovieri
GCA_001247975.1_12971_8_32_genomic.fna	gtdb	Bacteria	Proteobacteria	Gammaproteobacteria	Enterobacterales	Enterobacteriaceae	Shigella	Shigella sonnei
GCA_001249215.1_8290_4_53_genomic.fna	gtdb	Bacteria	Proteobacteria	Gammaproteobacteria	Enterobacterales	Enterobacteriaceae	Shigella	Shigella sonnei
GCA_001090885.1_5116_3_8_genomic.fna	gtdb	Bacteria	Proteobacteria	Gammaproteobacteria	Enterobacterales	Yersiniaceae	Yersinia	Yersinia enterocolitica
GCA_001064415.1_ASM106441v1_genomic.fna	gtdb	Bacteria	Proteobacteria	Gammaproteobacteria	Pasteurellales	Pasteurellaceae	Pasteurella	Pasteurella multocida
GCA_001060585.1_ASM106058v1_genomic.fna	gtdb	Bacteria	Proteobacteria	Gammaproteobacteria	Enterobacterales	Yersiniaceae	Serratia	Serratia marcescens
GCA_001054455.1_ASM105445v1_genomic.fna	gtdb	Bacteria	Proteobacteria	Gammaproteobacteria	Pasteurellales	Pasteurellaceae	Haemophilus	Haemophilus influenzae
GCA_001248785.1_5417_3_8_genomic.fna	gtdb	Bacteria	Proteobacteria	Gammaproteobacteria	Enterobacterales	Enterobacteriaceae	Shigella	Shigella sonnei
GCA_001248625.1_5236_8_8_genomic.fna	gtdb	Bacteria	Proteobacteria	Gammaproteobacteria	Enterobacterales	Enterobacteriaceae	Shigella	Shigella sonnei
GCA_001053885.1_ASM105388v1_genomic.fna	gtdb	Bacteria	Proteobacteria	Gammaproteobacteria	Pasteurellales	Pasteurellaceae	Haemophilus	Haemophilus influenzae
GCA_001078805.1_14928_1_79_genomic.fna	gtdb	Bacteria	Proteobacteria	Gammaproteobacteria	Enterobacterales	Enterobacteriaceae	Shigella	Shigella flexneri
GCA_001056955.1_ASM105695v1_genomic.fna	gtdb	Bacteria	Proteobacteria	Gammaproteobacteria	Aeromonadales	Aeromonadaceae	Aeromonas	Aeromonas hydrophila
GCA_001059125.1_ASM105912v1_genomic.fna	gtdb	Bacteria	Proteobacteria	Gammaproteobacteria	Pasteurellales	Pasteurellaceae	Haemophilus	Haemophilus influenzae
GCA_001247385.1_8489_2_91_genomic.fna	gtdb	Bacteria	Proteobacteria	Gammaproteobacteria	Enterobacterales	Enterobacteriaceae	Shigella	Shigella sonnei
GCA_001064585.1_ASM106458v1_genomic.fna	gtdb	Bacteria	Actinobacteria	Actinobacteria	Micrococcales	Micrococcaceae	Rothia	Rothia mucilaginosa
GCA_001248705.1_8290_4_40_genomic.fna	gtdb	Bacteria	Proteobacteria	Gammaproteobacteria	Enterobacterales	Enterobacteriaceae	Shigella	Shigella sonnei
GCA_001182085.1_5749_7_4_genomic.fna	gtdb	Bacteria	Proteobacteria	Gammaproteobacteria	Enterobacterales	Yersiniaceae	Yersinia	Yersinia enterocolitica
GCA_001076435.1_ASM107643v1_genomic.fna	gtdb	Bacteria	Actinobacteria	Actinobacteria	Corynebacteriales	Corynebacteriaceae	Corynebacterium	Corynebacterium jeikeium
GCA_001088505.1_4840_7_1_genomic.fna	gtdb	Bacteria	Proteobacteria	Gammaproteobacteria	Enterobacterales	Yersiniaceae	Yersinia	Yersinia intermedia
GCA_001166025.1_5139_2_10_genomic.fna	gtdb	Bacteria	Proteobacteria	Gammaproteobacteria	Enterobacterales	Yersiniaceae	Yersinia	Yersinia pseudotuberculosis
GCA_001182345.1_8016_2_78_genomic.fna	gtdb	Bacteria	Proteobacteria	Gammaproteobacteria	Enterobacterales	Yersiniaceae	Yersinia	Yersinia enterocolitica
GCA_001220045.1_4976_3_1_genomic.fna	gtdb	Bacteria	Proteobacteria	Gammaproteobacteria	Enterobacterales	Yersiniaceae	Yersinia	Yersinia enterocolitica
GCA_001146765.1_8016_2_63_genomic.fna	gtdb	Bacteria	Proteobacteria	Gammaproteobacteria	Enterobacterales	Yersiniaceae	Yersinia	Yersinia enterocolitica
GCA_001055915.1_ASM105591v1_genomic.fna	gtdb	Bacteria	Actinobacteria	Actinobacteria	Corynebacteriales	Corynebacteriaceae	Corynebacterium	Corynebacterium jeikeium
GCA_001219605.1_5116_2_4_genomic.fna	gtdb	Bacteria	Proteobacteria	Gammaproteobacteria	Enterobacterales	Yersiniaceae	Yersinia	Yersinia enterocolitica
GCA_001058575.1_ASM105857v1_genomic.fna	gtdb	Bacteria	Proteobacteria	Gammaproteobacteria	Pasteurellales	Pasteurellaceae	Haemophilus	Haemophilus influenzae
GCA_001220765.1_4821_7_10_genomic.fna	gtdb	Bacteria	Proteobacteria	Gammaproteobacteria	Enterobacterales	Yersiniaceae	Yersinia	Yersinia mollaretii
GCA_001184255.1_ASM118425v1_genomic.fna	gtdb	Bacteria	Firmicutes	Bacilli	Lactobacillales	Leuconostocaceae	Leuconostoc	Leuconostoc mesenteroides
GCA_001150565.1_8016_2_83_genomic.fna	gtdb	Bacteria	Proteobacteria	Gammaproteobacteria	Enterobacterales	Yersiniaceae	Yersinia	Yersinia enterocolitica
GCA_001219785.1_4976_1_8_genomic.fna	gtdb	Bacteria	Proteobacteria	Gammaproteobacteria	Enterobacterales	Yersiniaceae	Yersinia	Yersinia enterocolitica
GCA_001182205.1_5116_3_1_genomic.fna	gtdb	Bacteria	Proteobacteria	Gammaproteobacteria	Enterobacterales	Yersiniaceae	Yersinia	Yersinia enterocolitica
GCA_001249235.1_5417_3_3_genomic.fna	gtdb	Bacteria	Proteobacteria	Gammaproteobacteria	Enterobacterales	Enterobacteriaceae	Shigella	Shigella sonnei
GCA_001218485.1_8016_2_82_genomic.fna	gtdb	Bacteria	Proteobacteria	Gammaproteobacteria	Enterobacterales	Yersiniaceae	Yersinia	Yersinia enterocolitica
GCA_001052725.1_ASM105272v1_genomic.fna	gtdb	Bacteria	Proteobacteria	Gammaproteobacteria	Pasteurellales	Pasteurellaceae	Haemophilus	Haemophilus influenzae
GCA_001105765.1_4821_5_3_genomic.fna	gtdb	Bacteria	Proteobacteria	Gammaproteobacteria	Enterobacterales	Yersiniaceae	Yersinia	Yersinia frederiksenii
GCA_001142745.1_4821_6_5_genomic.fna	gtdb	Bacteria	Proteobacteria	Gammaproteobacteria	Enterobacterales	Yersiniaceae	Yersinia	Yersinia frederiksenii
GCA_001222265.1_4976_3_3_genomic.fna	gtdb	Bacteria	Proteobacteria	Gammaproteobacteria	Enterobacterales	Yersiniaceae	Yersinia	Yersinia enterocolitica
GCA_001135485.1_5139_5_6_genomic.fna	gtdb	Bacteria	Proteobacteria	Gammaproteobacteria	Enterobacterales	Yersiniaceae	Yersinia	Yersinia frederiksenii
GCA_001064725.1_ASM106472v1_genomic.fna	gtdb	Bacteria	Proteobacteria	Gammaproteobacteria	Enterobacterales	Yersiniaceae	Serratia	Serratia marcescens
GCA_001105985.1_8016_2_86_genomic.fna	gtdb	Bacteria	Proteobacteria	Gammaproteobacteria	Enterobacterales	Yersiniaceae	Yersinia	Yersinia enterocolitica
GCA_001182165.1_4976_7_3_genomic.fna	gtdb	Bacteria	Proteobacteria	Gammaproteobacteria	Enterobacterales	Yersiniaceae	Yersinia	Yersinia enterocolitica
GCA_001248255.1_5236_8_2_genomic.fna	gtdb	Bacteria	Proteobacteria	Gammaproteobacteria	Enterobacterales	Enterobacteriaceae	Shigella	Shigella sonnei
GCA_001244605.1_5139_2_4_genomic.fna	gtdb	Bacteria	Proteobacteria	Gammaproteobacteria	Enterobacterales	Yersiniaceae	Yersinia	Yersinia kristensenii
GCA_001244675.1_5139_5_2_genomic.fna	gtdb	Bacteria	Proteobacteria	Gammaproteobacteria	Enterobacterales	Yersiniaceae	Yersinia	Yersinia intermedia
GCA_001249615.1_Sg_201400696_ACTTGA_L001_genomic.fna	gtdb	Bacteria	Proteobacteria	Gammaproteobacteria	Enterobacterales	Enterobacteriaceae	Shigella	Shigella sonnei
GCA_001188555.1_ASM118855v1_genomic.fna	gtdb	Bacteria	Proteobacteria	Alphaproteobacteria	Rhodobacterales	Rhodobacteraceae	Pannonibacter	Pannonibacter phragmitetus
GCA_001104645.1_4821_5_8_genomic.fna	gtdb	Bacteria	Proteobacteria	Gammaproteobacteria	Enterobacterales	Yersiniaceae	Yersinia	Yersinia intermedia
GCA_001124425.1_5139_2_9_genomic.fna	gtdb	Bacteria	Proteobacteria	Gammaproteobacteria	Enterobacterales	Yersiniaceae	Yersinia	Yersinia pseudotuberculosis
GCA_001249395.1_9870_6_6_genomic.fna	gtdb	Bacteria	Proteobacteria	Gammaproteobacteria	Enterobacterales	Enterobacteriaceae	Shigella	Shigella sonnei
GCA_001182145.1_4976_7_5_genomic.fna	gtdb	Bacteria	Proteobacteria	Gammaproteobacteria	Enterobacterales	Yersiniaceae	Yersinia	Yersinia enterocolitica
GCA_001057055.1_ASM105705v1_genomic.fna	gtdb	Bacteria	Actinobacteria	Actinobacteria	Micrococcales	Cellulomonadaceae	Cellulomonas	Cellulomonas flavigena
GCA_001155645.1_5139_1_10_genomic.fna	gtdb	Bacteria	Proteobacteria	Gammaproteobacteria	Enterobacterales	Yersiniaceae	Yersinia	Yersinia pseudotuberculosis
GCA_001055485.1_ASM105548v1_genomic.fna	gtdb	Bacteria	Proteobacteria	Gammaproteobacteria	Pasteurellales	Pasteurellaceae	Haemophilus	Haemophilus influenzae
GCA_001157385.1_5139_5_8_genomic.fna	gtdb	Bacteria	Proteobacteria	Gammaproteobacteria	Enterobacterales	Yersiniaceae	Yersinia	Yersinia intermedia
GCA_001064145.1_ASM106414v1_genomic.fna	gtdb	Bacteria	Actinobacteria	Actinobacteria	Micrococcales	Sanguibacteraceae	Sanguibacter	Sanguibacter keddieii
GCA_001238575.1_ASM123857v1_genomic.fna	gtdb	Bacteria	Proteobacteria	Gammaproteobacteria	Enterobacterales	Pectobacteriaceae	Pectobacterium	Pectobacterium carotovorum
GCA_001065915.1_ASM106591v1_genomic.fna	gtdb	Bacteria	Proteobacteria	Gammaproteobacteria	Enterobacterales	Morganellaceae	Proteus	Proteus mirabilis
GCA_001248385.1_6551_1_3_genomic.fna	gtdb	Bacteria	Proteobacteria	Gammaproteobacteria	Enterobacterales	Enterobacteriaceae	Shigella	Shigella sonnei
GCA_001222305.1_5103_7_2_genomic.fna	gtdb	Bacteria	Proteobacteria	Gammaproteobacteria	Enterobacterales	Yersiniaceae	Yersinia	Yersinia enterocolitica
GCA_001114105.1_5139_1_4_genomic.fna	gtdb	Bacteria	Proteobacteria	Gammaproteobacteria	Enterobacterales	Yersiniaceae	Yersinia	Yersinia similis
GCA_001069685.1_ASM106968v1_genomic.fna	gtdb	Bacteria	Proteobacteria	Gammaproteobacteria	Xanthomonadales	Xanthomonadaceae	Stenotrophomonas	Stenotrophomonas maltophilia
GCA_001220825.1_4976_2_9_genomic.fna	gtdb	Bacteria	Proteobacteria	Gammaproteobacteria	Enterobacterales	Yersiniaceae	Yersinia	Yersinia enterocolitica
GCA_001064655.1_ASM106465v1_genomic.fna	gtdb	Bacteria	Proteobacteria	Gammaproteobacteria	Pseudomonadales	Moraxellaceae	Moraxella	Moraxella catarrhalis
GCA_001051325.1_Rickettsia_aeschlimannii_genomic.fna	gtdb	Bacteria	Proteobacteria	Alphaproteobacteria	Rickettsiales	Rickettsiaceae	Rickettsia	Rickettsia aeschlimannii
GCA_001166725.1_4840_7_6_genomic.fna	gtdb	Bacteria	Proteobacteria	Gammaproteobacteria	Enterobacterales	Yersiniaceae	Yersinia	Yersinia ruckeri
GCA_001152185.1_5139_5_9_genomic.fna	gtdb	Bacteria	Proteobacteria	Gammaproteobacteria	Enterobacterales	Yersiniaceae	Yersinia	Yersinia rohdei
GCA_001121425.1_8016_2_68_genomic.fna	gtdb	Bacteria	Proteobacteria	Gammaproteobacteria	Enterobacterales	Yersiniaceae	Yersinia	Yersinia enterocolitica
GCA_001222925.1_4821_7_3_genomic.fna	gtdb	Bacteria	Proteobacteria	Gammaproteobacteria	Enterobacterales	Yersiniaceae	Yersinia	Yersinia mollaretii
GCA_001053095.1_5139_1_3_genomic.fna	gtdb	Bacteria	Proteobacteria	Gammaproteobacteria	Enterobacterales	Yersiniaceae	Yersinia	Yersinia similis
GCA_001220145.1_5116_2_8_genomic.fna	gtdb	Bacteria	Proteobacteria	Gammaproteobacteria	Enterobacterales	Yersiniaceae	Yersinia	Yersinia enterocolitica
GCA_001221085.1_5116_2_5_genomic.fna	gtdb	Bacteria	Proteobacteria	Gammaproteobacteria	Enterobacterales	Yersiniaceae	Yersinia	Yersinia enterocolitica
GCA_001217745.1_4976_6_4_genomic.fna	gtdb	Bacteria	Proteobacteria	Gammaproteobacteria	Enterobacterales	Yersiniaceae	Yersinia	Yersinia enterocolitica
GCA_001073045.1_ASM107304v1_genomic.fna	gtdb	Bacteria	Proteobacteria	Gammaproteobacteria	Xanthomonadales	Xanthomonadaceae	Stenotrophomonas	Stenotrophomonas maltophilia
GCA_001223145.1_4976_1_5_genomic.fna	gtdb	Bacteria	Proteobacteria	Gammaproteobacteria	Enterobacterales	Yersiniaceae	Yersinia	Yersinia enterocolitica
GCA_001218525.1_5116_2_6_genomic.fna	gtdb	Bacteria	Proteobacteria	Gammaproteobacteria	Enterobacterales	Yersiniaceae	Yersinia	Yersinia enterocolitica
GCA_001244655.1_5139_1_7_genomic.fna	gtdb	Bacteria	Proteobacteria	Gammaproteobacteria	Enterobacterales	Yersiniaceae	Yersinia	Yersinia pseudotuberculosis
GCA_001062855.1_ASM106285v1_genomic.fna	gtdb	Bacteria	Actinobacteria	Actinobacteria	Micrococcales	Micrococcaceae	Rothia	Rothia mucilaginosa
GCA_001059385.1_ASM105938v1_genomic.fna	gtdb	Bacteria	Actinobacteria	Actinobacteria	Corynebacteriales	Corynebacteriaceae	Corynebacterium	Corynebacterium jeikeium
GCA_001184245.1_ASM118424v1_genomic.fna	gtdb	Bacteria	Firmicutes	Bacilli	Lactobacillales	Leuconostocaceae	Leuconostoc	Leuconostoc mesenteroides
GCA_001122605.1_8016_2_88_genomic.fna	gtdb	Bacteria	Proteobacteria	Gammaproteobacteria	Enterobacterales	Yersiniaceae	Yersinia	Yersinia aldovae
GCA_001065405.1_ASM106540v1_genomic.fna	gtdb	Bacteria	Proteobacteria	Gammaproteobacteria	Enterobacterales	Yersiniaceae	Serratia	Serratia marcescens
GCA_001068765.1_ASM106876v1_genomic.fna	gtdb	Bacteria	Proteobacteria	Gammaproteobacteria	Xanthomonadales	Xanthomonadaceae	Stenotrophomonas	Stenotrophomonas maltophilia
GCA_001214465.1_7396_7_36_genomic.fna	gtdb	Bacteria	Actinobacteria	Actinobacteria	Corynebacteriales	Mycobacteriaceae	Mycobacteroides	Mycobacteroides abscessus
GCA_001158505.1_5139_5_5_genomic.fna	gtdb	Bacteria	Proteobacteria	Gammaproteobacteria	Enterobacterales	Yersiniaceae	Yersinia	Yersinia kristensenii
GCA_001160345.1_8016_2_61_genomic.fna	gtdb	Bacteria	Proteobacteria	Gammaproteobacteria	Enterobacterales	Yersiniaceae	Yersinia	Yersinia enterocolitica
GCA_001171185.1_5116_3_5_genomic.fna	gtdb	Bacteria	Proteobacteria	Gammaproteobacteria	Enterobacterales	Yersiniaceae	Yersinia	Yersinia enterocolitica
GCA_001245685.1_12971_8_30_genomic.fna	gtdb	Bacteria	Proteobacteria	Gammaproteobacteria	Enterobacterales	Enterobacteriaceae	Shigella	Shigella sonnei
GCA_001220185.1_4976_1_11_genomic.fna	gtdb	Bacteria	Proteobacteria	Gammaproteobacteria	Enterobacterales	Yersiniaceae	Yersinia	Yersinia enterocolitica
GCA_001153385.1_4821_5_2_genomic.fna	gtdb	Bacteria	Proteobacteria	Gammaproteobacteria	Enterobacterales	Yersiniaceae	Yersinia	Yersinia intermedia
GCA_001077695.1_ASM107769v1_genomic.fna	gtdb	Bacteria	Proteobacteria	Gammaproteobacteria	Alteromonadales	Alteromonadaceae	Alteromonas	Alteromonas macleodii
GCA_001058455.1_ASM105845v1_genomic.fna	gtdb	Bacteria	Actinobacteria	Actinobacteria	Corynebacteriales	Corynebacteriaceae	Corynebacterium	Corynebacterium striatum
GCA_001077275.1_ASM107727v1_genomic.fna	gtdb	Bacteria	Firmicutes	Bacilli	Lactobacillales	Leuconostocaceae	Leuconostoc	Leuconostoc citreum
GCA_001249355.1_12971_8_69_genomic.fna	gtdb	Bacteria	Proteobacteria	Gammaproteobacteria	Enterobacterales	Enterobacteriaceae	Shigella	Shigella sonnei
GCA_001064835.1_ASM106483v1_genomic.fna	gtdb	Bacteria	Proteobacteria	Gammaproteobacteria	Enterobacterales	Yersiniaceae	Serratia	Serratia marcescens
GCA_001246385.1_5417_3_1_genomic.fna	gtdb	Bacteria	Proteobacteria	Gammaproteobacteria	Enterobacterales	Enterobacteriaceae	Shigella	Shigella sonnei
GCA_001140765.1_4821_5_11_genomic.fna	gtdb	Bacteria	Proteobacteria	Gammaproteobacteria	Enterobacterales	Yersiniaceae	Yersinia	Yersinia intermedia
GCA_001248345.1_8290_4_87_genomic.fna	gtdb	Bacteria	Proteobacteria	Gammaproteobacteria	Enterobacterales	Enterobacteriaceae	Shigella	Shigella sonnei
GCA_001248725.1_9870_6_5_genomic.fna	gtdb	Bacteria	Proteobacteria	Gammaproteobacteria	Enterobacterales	Enterobacteriaceae	Shigella	Shigella sonnei
GCA_001062845.1_ASM106284v1_genomic.fna	gtdb	Bacteria	Proteobacteria	Gammaproteobacteria	Pseudomonadales	Moraxellaceae	Moraxella	Moraxella catarrhalis
GCA_001248315.1_5236_3_11_genomic.fna	gtdb	Bacteria	Proteobacteria	Gammaproteobacteria	Enterobacterales	Enterobacteriaceae	Shigella	Shigella sonnei
GCA_001071115.1_ASM107111v1_genomic.fna	gtdb	Bacteria	Proteobacteria	Gammaproteobacteria	Xanthomonadales	Xanthomonadaceae	Stenotrophomonas	Stenotrophomonas maltophilia
GCA_001060765.1_ASM106076v1_genomic.fna	gtdb	Bacteria	Proteobacteria	Gammaproteobacteria	Enterobacterales	Morganellaceae	Proteus	Proteus mirabilis
GCA_001249115.1_12971_8_80_genomic.fna	gtdb	Bacteria	Proteobacteria	Gammaproteobacteria	Enterobacterales	Enterobacteriaceae	Shigella	Shigella sonnei
GCA_001059955.1_ASM105995v1_genomic.fna	gtdb	Bacteria	Actinobacteria	Actinobacteria	Corynebacteriales	Corynebacteriaceae	Corynebacterium	Corynebacterium striatum
GCA_001247905.1_12971_8_78_genomic.fna	gtdb	Bacteria	Proteobacteria	Gammaproteobacteria	Enterobacterales	Enterobacteriaceae	Shigella	Shigella sonnei
GCA_001055995.1_ASM105599v1_genomic.fna	gtdb	Bacteria	Actinobacteria	Actinobacteria	Corynebacteriales	Corynebacteriaceae	Corynebacterium	Corynebacterium jeikeium
GCA_001222805.1_4976_1_1_genomic.fna	gtdb	Bacteria	Proteobacteria	Gammaproteobacteria	Enterobacterales	Yersiniaceae	Yersinia	Yersinia enterocolitica
GCA_001168925.1_5116_3_7_genomic.fna	gtdb	Bacteria	Proteobacteria	Gammaproteobacteria	Enterobacterales	Yersiniaceae	Yersinia	Yersinia enterocolitica
GCA_001125325.1_5103_7_5_genomic.fna	gtdb	Bacteria	Proteobacteria	Gammaproteobacteria	Enterobacterales	Yersiniaceae	Yersinia	Yersinia enterocolitica
GCA_001248685.1_8290_4_4_genomic.fna	gtdb	Bacteria	Proteobacteria	Gammaproteobacteria	Enterobacterales	Enterobacteriaceae	Shigella	Shigella sonnei
GCA_001223425.1_5749_7_2_genomic.fna	gtdb	Bacteria	Proteobacteria	Gammaproteobacteria	Enterobacterales	Yersiniaceae	Yersinia	Yersinia enterocolitica
GCA_000473025.1_ASM47302v1_genomic.fna	gtdb	Bacteria	Proteobacteria	Alphaproteobacteria	Rhizobiales	Bradyrhizobiaceae	Bradyrhizobium	Bradyrhizobium diazoefficiens
GCA_000425645.1_ASM42564v1_genomic.fna	gtdb	Bacteria	Bacteroidetes	Flavobacteriia	Flavobacteriales	Flavobacteriaceae	Gaetbulibacter	Gaetbulibacter saemankumensis
GCA_000455225.1_Megasphaera_massiliensis_genomic.fna	gtdb	Bacteria	Firmicutes	Negativicutes	Veillonellales	Veillonellaceae	Megasphaera	Megasphaera massiliensis
GCA_000465615.2_GS_De_Novo_Assembly_genomic.fna	gtdb	Bacteria	Proteobacteria	Gammaproteobacteria	Enterobacterales	Yersiniaceae	Serratia	Serratia marcescens
GCA_000427825.1_ASM42782v1_genomic.fna	gtdb	Bacteria	Actinobacteria	Actinobacteria	Pseudonocardiales	Pseudonocardiaceae	Thermocrispum	Thermocrispum municipale
GCA_000473105.1_ASM47310v1_genomic.fna	gtdb	Bacteria	Proteobacteria	Alphaproteobacteria	Rhodobacterales	Rhodobacteraceae	Phaeobacter	Phaeobacter inhibens
GCA_000472965.1_ASM47296v1_genomic.fna	gtdb	Bacteria	Proteobacteria	Alphaproteobacteria	Rhizobiales	Bradyrhizobiaceae	Bradyrhizobium	Bradyrhizobium elkanii
GCA_000480035.1_Bruc_suis_06-791-1309_V1_genomic.fna	gtdb	Bacteria	Proteobacteria	Alphaproteobacteria	Rhizobiales	Brucellaceae	Brucella	Brucella suis
GCA_000473425.1_ASM47342v1_genomic.fna	gtdb	Bacteria	Proteobacteria	Alphaproteobacteria	Rhizobiales	Rhizobiaceae	Sinorhizobium	Sinorhizobium meliloti
GCA_000447435.2_ASM44743v2_genomic.fna	gtdb	Bacteria	Proteobacteria	Gammaproteobacteria	Aeromonadales	Aeromonadaceae	Aeromonas	Aeromonas salmonicida
GCA_000467955.1_ASM46795v1_genomic.fna	gtdb	Bacteria	Bacteroidetes	Bacteroidia	Bacteroidales	Porphyromonadaceae	Porphyromonas	Porphyromonas gingivalis
GCA_000425185.1_ASM42518v1_genomic.fna	gtdb	Bacteria	Proteobacteria	Alphaproteobacteria	Rhizobiales	Methylocystaceae	Pleomorphomonas	Pleomorphomonas koreensis
GCA_000428885.1_ASM42888v1_genomic.fna	gtdb	Bacteria	Acidobacteria	Holophagae	Holophagales	Holophagaceae	Geothrix	Geothrix fermentans
GCA_000447885.1_LLT1.01_genomic.fna	gtdb	Bacteria	Firmicutes	Bacilli	Lactobacillales	Streptococcaceae	Lactococcus	Lactococcus lactis
GCA_000429065.1_ASM42906v1_genomic.fna	gtdb	Bacteria	Proteobacteria	Gammaproteobacteria	Xanthomonadales	Xanthomonadaceae	Silanimonas	Silanimonas lenta
GCA_000467245.1_Shigella_dysenteriae_strain_SD1D_genomic.fna	gtdb	Bacteria	Proteobacteria	Gammaproteobacteria	Enterobacterales	Enterobacteriaceae	Shigella	Shigella dysenteriae
GCA_000429125.1_ASM42912v1_genomic.fna	gtdb	Bacteria	Bacteroidetes	Flavobacteriia	Flavobacteriales	Flavobacteriaceae	Aequorivita	Aequorivita capsosiphonis
GCA_000473205.1_ASM47320v1_genomic.fna	gtdb	Bacteria	Proteobacteria	Alphaproteobacteria	Rhodobacterales	Rhodobacteraceae	Pseudophaeobacter	Pseudophaeobacter arcticus
GCA_000443105.1_MhD38v2_genomic.fna	gtdb	Bacteria	Proteobacteria	Gammaproteobacteria	Pasteurellales	Pasteurellaceae	Mannheimia	Mannheimia haemolytica
GCA_000468055.1_ASM46805v1_genomic.fna	gtdb	Bacteria	Spirochaetes	Spirochaetia	Spirochaetales	Spirochaetaceae	Treponema	Treponema lecithinolyticum
GCA_000421725.1_ASM42172v1_genomic.fna	gtdb	Bacteria	Firmicutes	Clostridia	Thermoanaerobacterales	Thermoanaerobacterales Family III. Incertae Sedis	Caldicellulosiruptor	Caldicellulosiruptor acetigenus
GCA_000464785.1_NC407_1_genomic.fna	gtdb	Bacteria	Cyanobacteria	NA	Oscillatoriales	Microcoleaceae	Planktothrix	Planktothrix rubescens
GCA_000478885.1_ASM47888v1_genomic.fna	gtdb	Bacteria	Actinobacteria	Coriobacteriia	Eggerthellales	Eggerthellaceae	Adlercreutzia	Adlercreutzia equolifaciens
GCA_000421625.1_ASM42162v1_genomic.fna	gtdb	Bacteria	Deinococcus-Thermus	Deinococci	Thermales	Thermaceae	Thermus	Thermus islandicus
GCA_000472485.1_ASM47248v1_genomic.fna	gtdb	Bacteria	Bacteroidetes	Cytophagia	Cytophagales	Hymenobacteraceae	Pontibacter	Pontibacter actiniarum
GCA_000468595.1_Cbal13_1.0_genomic.fna	gtdb	Bacteria	Bacteroidetes	Flavobacteriia	Flavobacteriales	Flavobacteriaceae	Cellulophaga	Cellulophaga baltica
GCA_000447905.1_LLDT2.01_genomic.fna	gtdb	Bacteria	Firmicutes	Bacilli	Lactobacillales	Streptococcaceae	Lactococcus	Lactococcus lactis
GCA_000421285.1_ASM42128v1_genomic.fna	gtdb	Bacteria	Proteobacteria	Deltaproteobacteria	Desulfobacterales	Desulfobacteraceae	Desulfotignum	Desulfotignum balticum
GCA_000479285.1_Fuso_nucl_CTI-1_V1_genomic.fna	gtdb	Bacteria	Fusobacteria	Fusobacteriia	Fusobacteriales	Fusobacteriaceae	Fusobacterium	Fusobacterium nucleatum
GCA_000451885.2_ASM45188v2_genomic.fna	gtdb	Bacteria	Firmicutes	Clostridia	Clostridiales	Peptostreptococcaceae	Clostridioides	Clostridioides difficile
GCA_000428705.1_ASM42870v1_genomic.fna	gtdb	Bacteria	Tenericutes	Mollicutes	Acholeplasmatales	Acholeplasmataceae	Acholeplasma	Acholeplasma axanthum
GCA_000472605.1_ASM47260v1_genomic.fna	gtdb	Bacteria	Proteobacteria	Alphaproteobacteria	Pelagibacterales	Pelagibacteraceae	Candidatus Pelagibacter	Candidatus Pelagibacter ubique
GCA_000429865.1_ASM42986v1_genomic.fna	gtdb	Bacteria	Proteobacteria	Alphaproteobacteria	Rhizobiales	Hyphomicrobiaceae	Cucumibacter	Cucumibacter marinus
GCA_000427645.1_ASM42764v1_genomic.fna	gtdb	Bacteria	Proteobacteria	Alphaproteobacteria	Sphingomonadales	Sphingomonadaceae	Sphingomonas	Sphingomonas phyllosphaerae
GCA_000423065.1_ASM42306v1_genomic.fna	gtdb	Bacteria	Bacteroidetes	Flavobacteriia	Flavobacteriales	Flavobacteriaceae	Gramella	Gramella echinicola
GCA_000428665.1_ASM42866v1_genomic.fna	gtdb	Bacteria	Proteobacteria	Gammaproteobacteria	Xanthomonadales	Xanthomonadaceae	Xylella	Xylella fastidiosa
GCA_000427745.1_ASM42774v1_genomic.fna	gtdb	Bacteria	Proteobacteria	Alphaproteobacteria	Rhizobiales	Rhizobiaceae	Sinorhizobium	Sinorhizobium meliloti
GCA_000465555.2_GS_De_Novo_Assembly_genomic.fna	gtdb	Bacteria	Proteobacteria	Gammaproteobacteria	Enterobacterales	Erwiniaceae	Pantoea	Pantoea dispersa
GCA_000427485.1_ASM42748v1_genomic.fna	gtdb	Bacteria	Proteobacteria	Alphaproteobacteria	Rhizobiales	Rhizobiaceae	Sinorhizobium	Sinorhizobium meliloti
GCA_000423905.1_ASM42390v1_genomic.fna	gtdb	Bacteria	Deinococcus-Thermus	Deinococci	Thermales	Thermaceae	Thermus	Thermus antranikianii
GCA_000472865.1_ASM47286v1_genomic.fna	gtdb	Bacteria	Proteobacteria	Alphaproteobacteria	Rhizobiales	Bradyrhizobiaceae	Bradyrhizobium	Bradyrhizobium elkanii
GCA_000466185.1_ASM46618v1_genomic.fna	gtdb	Bacteria	Actinobacteria	Actinobacteria	Actinomycetales	Actinomycetaceae	Actinomyces	Actinomyces graevenitzii
GCA_000449565.2_ASM44956v2_genomic.fna	gtdb	Bacteria	Firmicutes	Clostridia	Clostridiales	Peptostreptococcaceae	Clostridioides	Clostridioides difficile
GCA_000439225.1_AtWRT31V1.0_genomic.fna	gtdb	Bacteria	Proteobacteria	Alphaproteobacteria	Rhizobiales	Rhizobiaceae	Agrobacterium	Agrobacterium tumefaciens
GCA_000422265.1_ASM42226v1_genomic.fna	gtdb	Bacteria	Bacteroidetes	Flavobacteriia	Flavobacteriales	Flavobacteriaceae	Chryseobacterium	Chryseobacterium palustre
GCA_000478275.1_AO9412_01_genomic.fna	gtdb	Bacteria	Actinobacteria	Actinobacteria	Pseudonocardiales	Pseudonocardiaceae	Amycolatopsis	Amycolatopsis orientalis
GCA_000425425.1_ASM42542v1_genomic.fna	gtdb	Bacteria	Bacteroidetes	Flavobacteriia	Flavobacteriales	Flavobacteriaceae	Flavobacterium	Flavobacterium daejeonense
GCA_000474945.1_ASM47494v1_genomic.fna	gtdb	Bacteria	Proteobacteria	Gammaproteobacteria	Nevskiales	Sinobacteraceae	Solimonas	Solimonas soli
GCA_000426465.1_ASM42646v1_genomic.fna	gtdb	Bacteria	Bacteroidetes	Flavobacteriia	Flavobacteriales	Flavobacteriaceae	Chryseobacterium	Chryseobacterium caeni
GCA_000422305.1_ASM42230v1_genomic.fna	gtdb	Bacteria	Proteobacteria	Gammaproteobacteria	Xanthomonadales	Xanthomonadaceae	Luteimonas	Luteimonas mephitis
GCA_000421545.1_ASM42154v1_genomic.fna	gtdb	Bacteria	Actinobacteria	Actinobacteria	Micrococcales	Microbacteriaceae	Agromyces	Agromyces italicus
GCA_000474215.1_ASM47421v1_genomic.fna	gtdb	Bacteria	Proteobacteria	Gammaproteobacteria	Enterobacterales	Hafniaceae	Edwardsiella	Edwardsiella hoshinae
GCA_000471625.1_PsAq1.0_genomic.fna	gtdb	Bacteria	Proteobacteria	Gammaproteobacteria	Pseudomonadales	Moraxellaceae	Psychrobacter	Psychrobacter aquaticus
GCA_000472565.1_ASM47256v1_genomic.fna	gtdb	Bacteria	Proteobacteria	Alphaproteobacteria	Pelagibacterales	Pelagibacteraceae	Candidatus Pelagibacter	Candidatus Pelagibacter ubique
GCA_000423005.1_ASM42300v1_genomic.fna	gtdb	Bacteria	Bacteroidetes	Flavobacteriia	Flavobacteriales	Flavobacteriaceae	Gelidibacter	Gelidibacter mesophilus
GCA_000427465.1_ASM42746v1_genomic.fna	gtdb	Bacteria	Proteobacteria	Alphaproteobacteria	Rhizobiales	Rhizobiaceae	Sinorhizobium	Sinorhizobium arboris
GCA_000423485.1_ASM42348v1_genomic.fna	gtdb	Bacteria	Actinobacteria	Actinobacteria	Propionibacteriales	Propionibacteriaceae	Propionimicrobium	Propionimicrobium lymphophilum
GCA_000463645.1_TM16_assembly2012_genomic.fna	gtdb	Bacteria	Actinobacteria	Actinobacteria	Propionibacteriales	Propionibacteriaceae	Cutibacterium	Cutibacterium avidum
GCA_000427445.1_ASM42744v1_genomic.fna	gtdb	Bacteria	Proteobacteria	Alphaproteobacteria	Rhizobiales	Beijerinckiaceae	Methylocapsa	Methylocapsa acidiphila
GCA_000421525.1_ASM42152v1_genomic.fna	gtdb	Bacteria	Actinobacteria	Actinobacteria	Propionibacteriales	Propionibacteriaceae	Aestuariimicrobium	Aestuariimicrobium kwangyangense
GCA_000450105.2_ASM45010v2_genomic.fna	gtdb	Bacteria	Firmicutes	Clostridia	Clostridiales	Peptostreptococcaceae	Clostridioides	Clostridioides difficile
GCA_000422365.1_ASM42236v1_genomic.fna	gtdb	Bacteria	Bacteroidetes	Flavobacteriia	Flavobacteriales	Flavobacteriaceae	Mesoflavibacter	Mesoflavibacter zeaxanthinifaciens
GCA_000424685.1_ASM42468v1_genomic.fna	gtdb	Bacteria	Proteobacteria	Gammaproteobacteria	Methylococcales	Methylococcaceae	Methylococcus	Methylococcus capsulatus
GCA_000475035.1_ASM47503v1_genomic.fna	gtdb	Bacteria	Proteobacteria	Gammaproteobacteria	Enterobacterales	Erwiniaceae	Pantoea	Pantoea ananatis
GCA_000480055.1_Bruc_suis_04-0115_V1_genomic.fna	gtdb	Bacteria	Proteobacteria	Alphaproteobacteria	Rhizobiales	Brucellaceae	Brucella	Brucella suis
GCA_000478545.1_ASM47854v1_genomic.fna	gtdb	Bacteria	Proteobacteria	Gammaproteobacteria	Enterobacterales	Yersiniaceae	Serratia	Serratia plymuthica
GCA_000480215.1_Bruc_meli_11-1823-3434_V1_genomic.fna	gtdb	Bacteria	Proteobacteria	Alphaproteobacteria	Rhizobiales	Brucellaceae	Brucella	Brucella melitensis
GCA_000470885.1_RhoBCP1_1.0_genomic.fna	gtdb	Bacteria	Actinobacteria	Actinobacteria	Corynebacteriales	Nocardiaceae	Rhodococcus	Rhodococcus aetherivorans
GCA_000422945.1_ASM42294v1_genomic.fna	gtdb	Bacteria	Bacteroidetes	Sphingobacteriia	Sphingobacteriales	Sphingobacteriaceae	Pedobacter	Pedobacter oryzae
GCA_000421645.1_ASM42164v1_genomic.fna	gtdb	Bacteria	Proteobacteria	Alphaproteobacteria	Rhizobiales	Aurantimonadaceae	Aurantimonas	Aurantimonas coralicida
GCA_000421185.1_ASM42118v1_genomic.fna	gtdb	Bacteria	Actinobacteria	Actinobacteria	Micrococcales	Intrasporangiaceae	Ornithinimicrobium	Ornithinimicrobium pekingense
GCA_000430025.1_ASM43002v1_genomic.fna	gtdb	Bacteria	Bacteroidetes	Flavobacteriia	Flavobacteriales	Flavobacteriaceae	Flavobacterium	Flavobacterium suncheonense
GCA_000468755.1_OprofF0195v1.0_genomic.fna	gtdb	Bacteria	Actinobacteria	Coriobacteriia	Coriobacteriales	Atopobiaceae	Olsenella	Olsenella profusa
GCA_000422685.1_ASM42268v1_genomic.fna	gtdb	Bacteria	Bacteroidetes	Flavobacteriia	Flavobacteriales	Flavobacteriaceae	Flavobacterium	Flavobacterium gelidilacus
GCA_000452325.2_ASM45232v2_genomic.fna	gtdb	Bacteria	Firmicutes	Clostridia	Clostridiales	Peptostreptococcaceae	Clostridioides	Clostridioides difficile
GCA_000442845.1_LLA12V1_genomic.fna	gtdb	Bacteria	Firmicutes	Bacilli	Lactobacillales	Streptococcaceae	Lactococcus	Lactococcus lactis
GCA_000423705.1_ASM42370v1_genomic.fna	gtdb	Bacteria	Proteobacteria	Alphaproteobacteria	Rhodobacterales	Rhodobacteraceae	Stappia	Stappia stellulata
GCA_000480095.1_Bruc_meli_02-5863-1_V1_genomic.fna	gtdb	Bacteria	Proteobacteria	Alphaproteobacteria	Rhizobiales	Brucellaceae	Brucella	Brucella melitensis
GCA_000445475.1_Version_1_of_the_Sulfurimonas_hongkongensis_AST-10_genome_genomic.fna	gtdb	Bacteria	Proteobacteria	Epsilonproteobacteria	Campylobacterales	Helicobacteraceae	Sulfurimonas	Sulfurimonas hongkongensis
GCA_000423445.1_ASM42344v1_genomic.fna	gtdb	Bacteria	Actinobacteria	Actinobacteria	Propionibacteriales	Propionibacteriaceae	Acidipropionibacterium	Acidipropionibacterium thoenii
GCA_000480155.1_Bruc_suis_97-9757_V1_genomic.fna	gtdb	Bacteria	Proteobacteria	Alphaproteobacteria	Rhizobiales	Brucellaceae	Brucella	Brucella suis
GCA_000443185.1_MhSwine2000v2_genomic.fna	gtdb	Bacteria	Proteobacteria	Gammaproteobacteria	Pasteurellales	Pasteurellaceae	Mannheimia	Mannheimia haemolytica
GCA_000421705.1_ASM42170v1_genomic.fna	gtdb	Bacteria	Proteobacteria	Alphaproteobacteria	Caulobacterales	Caulobacteraceae	Brevundimonas	Brevundimonas naejangsanensis
GCA_000479245.1_Fuso_nucl_CTI-3_V1_genomic.fna	gtdb	Bacteria	Fusobacteria	Fusobacteriia	Fusobacteriales	Fusobacteriaceae	Fusobacterium	Fusobacterium nucleatum
GCA_000426845.1_ASM42684v1_genomic.fna	gtdb	Bacteria	Proteobacteria	Alphaproteobacteria	Rhizobiales	Bradyrhizobiaceae	Bradyrhizobium	Bradyrhizobium japonicum
GCA_000480175.1_Bruc_abor_89-2646-1238_V1_genomic.fna	gtdb	Bacteria	Proteobacteria	Alphaproteobacteria	Rhizobiales	Brucellaceae	Brucella	Brucella abortus
GCA_000479225.1_Fuso_nucl_CTI-5_V1_genomic.fna	gtdb	Bacteria	Fusobacteria	Fusobacteriia	Fusobacteriales	Fusobacteriaceae	Fusobacterium	Fusobacterium nucleatum
GCA_000472025.1_Gordonia_amicalis_CCMA-559_genomic.fna	gtdb	Bacteria	Actinobacteria	Actinobacteria	Corynebacteriales	Gordoniaceae	Gordonia	Gordonia amicalis
GCA_000454725.1_ibidis.assembly_genomic.fna	gtdb	Bacteria	Chlamydiae	Chlamydiia	Chlamydiales	Chlamydiaceae	Chlamydia	Chlamydia ibidis
GCA_000427365.1_ASM42736v1_genomic.fna	gtdb	Bacteria	Bacteroidetes	Bacteroidia	Bacteroidales	Rikenellaceae	Rikenella	Rikenella microfusus
GCA_000427605.1_ASM42760v1_genomic.fna	gtdb	Bacteria	Proteobacteria	Gammaproteobacteria	Cellvibrionales	Cellvibrionaceae	Teredinibacter	Teredinibacter turnerae
GCA_000472985.1_ASM47298v1_genomic.fna	gtdb	Bacteria	Proteobacteria	Alphaproteobacteria	Rhizobiales	Bradyrhizobiaceae	Bradyrhizobium	Bradyrhizobium japonicum
GCA_000429005.1_ASM42900v1_genomic.fna	gtdb	Bacteria	Proteobacteria	Alphaproteobacteria	Sphingomonadales	Sphingomonadaceae	Novosphingobium	Novosphingobium acidiphilum
GCA_000422885.1_ASM42288v1_genomic.fna	gtdb	Bacteria	Proteobacteria	Betaproteobacteria	Burkholderiales	Comamonadaceae	Ottowia	Ottowia thiooxydans
GCA_000468635.1_PbaroF0067v1.0_genomic.fna	gtdb	Bacteria	Bacteroidetes	Bacteroidia	Bacteroidales	Prevotellaceae	Prevotella	Prevotella baroniae
GCA_000467795.1_ASM46779v1_genomic.fna	gtdb	Bacteria	Bacteroidetes	Bacteroidia	Bacteroidales	Porphyromonadaceae	Porphyromonas	Porphyromonas gingivalis
GCA_000468115.1_TsocrATCC35536v1.0_genomic.fna	gtdb	Bacteria	Spirochaetes	Spirochaetia	Spirochaetales	Spirochaetaceae	Treponema	Treponema socranskii
GCA_000472765.1_ASM47276v1_genomic.fna	gtdb	Bacteria	Proteobacteria	Alphaproteobacteria	Rhizobiales	Bradyrhizobiaceae	Bradyrhizobium	Bradyrhizobium elkanii
GCA_000424885.1_ASM42488v1_genomic.fna	gtdb	Bacteria	Actinobacteria	Actinobacteria	Micromonosporales	Micromonosporaceae	Salinispora	Salinispora arenicola
GCA_000451105.2_ASM45110v2_genomic.fna	gtdb	Bacteria	Firmicutes	Clostridia	Clostridiales	Peptostreptococcaceae	Clostridioides	Clostridioides difficile
GCA_000422985.1_ASM42298v1_genomic.fna	gtdb	Bacteria	Proteobacteria	Alphaproteobacteria	Sphingomonadales	Erythrobacteraceae	Porphyrobacter	Porphyrobacter cryptus
GCA_000427625.1_ASM42762v1_genomic.fna	gtdb	Bacteria	Proteobacteria	Gammaproteobacteria	Methylococcales	Methylococcaceae	Methylobacter	Methylobacter luteus
GCA_000450365.2_ASM45036v2_genomic.fna	gtdb	Bacteria	Firmicutes	Clostridia	Clostridiales	Peptostreptococcaceae	Clostridioides	Clostridioides difficile
GCA_000472685.1_ASM47268v1_genomic.fna	gtdb	Bacteria	Proteobacteria	Alphaproteobacteria	Rhizobiales	Bradyrhizobiaceae	Bradyrhizobium	Bradyrhizobium arachidis
GCA_000443085.1_MhD35v2_genomic.fna	gtdb	Bacteria	Proteobacteria	Gammaproteobacteria	Pasteurellales	Pasteurellaceae	Mannheimia	Mannheimia haemolytica
GCA_000472365.1_ASM47236v1_genomic.fna	gtdb	Bacteria	Proteobacteria	Alphaproteobacteria	Rhizobiales	Phyllobacteriaceae	Mesorhizobium	Mesorhizobium ciceri
GCA_000428465.1_ASM42846v1_genomic.fna	gtdb	Bacteria	Proteobacteria	Betaproteobacteria	Burkholderiales	Burkholderiaceae	Chitinimonas	Chitinimonas koreensis
GCA_000428005.1_ASM42800v1_genomic.fna	gtdb	Bacteria	Proteobacteria	Alphaproteobacteria	Rhizobiales	Rhizobiaceae	Sinorhizobium	Sinorhizobium meliloti
GCA_000423345.1_ASM42334v1_genomic.fna	gtdb	Bacteria	Proteobacteria	Gammaproteobacteria	Cellvibrionales	Cellvibrionaceae	Marinimicrobium	Marinimicrobium agarilyticum
GCA_000425585.1_ASM42558v1_genomic.fna	gtdb	Bacteria	Bacteroidetes	Chitinophagia	Chitinophagales	Chitinophagaceae	Terrimonas	Terrimonas ferruginea
GCA_000455805.1_ASM45580v1_genomic.fna	gtdb	Bacteria	Actinobacteria	Actinobacteria	Corynebacteriales	Corynebacteriaceae	Corynebacterium	Corynebacterium diphtheriae
GCA_000421565.1_ASM42156v1_genomic.fna	gtdb	Bacteria	Actinobacteria	Actinobacteria	Micrococcales	Microbacteriaceae	Agromyces	Agromyces subbeticus
GCA_000473145.1_ASM47314v1_genomic.fna	gtdb	Bacteria	Proteobacteria	Alphaproteobacteria	Rhodobacterales	Rhodobacteraceae	Leisingera	Leisingera daeponensis
GCA_000464765.1_NC406_1_genomic.fna	gtdb	Bacteria	Cyanobacteria	NA	Oscillatoriales	Microcoleaceae	Planktothrix	Planktothrix prolifica
GCA_000428505.1_ASM42850v1_genomic.fna	gtdb	Bacteria	Proteobacteria	Gammaproteobacteria	Oceanospirillales	Halomonadaceae	Halomonas	Halomonas anticariensis
GCA_000421845.1_ASM42184v1_genomic.fna	gtdb	Bacteria	Actinobacteria	Actinobacteria	Micrococcales	Microbacteriaceae	Leucobacter	Leucobacter chironomi
GCA_000476315.1_UTAD54_1_genomic.fna	gtdb	Bacteria	Proteobacteria	Gammaproteobacteria	Enterobacterales	Yersiniaceae	Serratia	Serratia fonticola
GCA_000473165.1_ASM47316v1_genomic.fna	gtdb	Bacteria	Proteobacteria	Alphaproteobacteria	Rhodobacterales	Rhodobacteraceae	Leisingera	Leisingera aquimarina
GCA_000442515.1_PhaespirillumFulvum_1.0_genomic.fna	gtdb	Bacteria	Proteobacteria	Alphaproteobacteria	Rhodospirillales	Rhodospirillaceae	Phaeospirillum	Phaeospirillum fulvum
GCA_000429405.1_ASM42940v1_genomic.fna	gtdb	Bacteria	Bacteroidetes	Cytophagia	Cytophagales	Cyclobacteriaceae	Algoriphagus	Algoriphagus marincola
GCA_000467835.1_ASM46783v1_genomic.fna	gtdb	Bacteria	Bacteroidetes	Bacteroidia	Bacteroidales	Porphyromonadaceae	Porphyromonas	Porphyromonas gingivalis
GCA_000473955.1__oprFasNSB1_genomic.fna	gtdb	Bacteria	Bacteroidetes	Bacteroidia	Bacteroidales	Barnesiellaceae	Coprobacter	Coprobacter fastidiosus
GCA_000473405.1_ASM47340v1_genomic.fna	gtdb	Bacteria	Proteobacteria	Alphaproteobacteria	Rhizobiales	Rhizobiaceae	Sinorhizobium	Sinorhizobium meliloti
GCA_000423645.1_ASM42364v1_genomic.fna	gtdb	Bacteria	Proteobacteria	Alphaproteobacteria	Rhodobacterales	Rhodobacteraceae	Sediminimonas	Sediminimonas qiaohouensis
GCA_000425045.1_ASM42504v1_genomic.fna	gtdb	Bacteria	Firmicutes	Negativicutes	Acidaminococcales	Acidaminococcaceae	Acidaminococcus	Acidaminococcus intestini
GCA_000425465.1_ASM42546v1_genomic.fna	gtdb	Bacteria	Bacteroidetes	Flavobacteriia	Flavobacteriales	Flavobacteriaceae	Flavobacterium	Flavobacterium filum
GCA_000475115.2_YP113_v2_genomic.fna	gtdb	Bacteria	Proteobacteria	Gammaproteobacteria	Enterobacterales	Yersiniaceae	Yersinia	Yersinia pestis
GCA_000425485.1_ASM42548v1_genomic.fna	gtdb	Bacteria	Bacteroidetes	Flavobacteriia	Flavobacteriales	Flavobacteriaceae	Flavobacterium	Flavobacterium tegetincola
GCA_000442275.2_Thalar_genomic.fna	gtdb	Bacteria	Proteobacteria	Alphaproteobacteria	Rhodobacterales	Rhodobacteraceae	Litoreibacter	Litoreibacter arenae
GCA_000421305.1_ASM42130v1_genomic.fna	gtdb	Bacteria	Proteobacteria	Alphaproteobacteria	Rhizobiales	Bradyrhizobiaceae	Bradyrhizobium	Bradyrhizobium japonicum
GCA_000445065.1_ASM44506v1_genomic.fna	gtdb	Bacteria	Proteobacteria	Alphaproteobacteria	Sphingomonadales	Sphingomonadaceae	Sphingobium	Sphingobium quisquiliarum
GCA_000429105.1_ASM42910v1_genomic.fna	gtdb	Bacteria	Actinobacteria	Actinobacteria	Actinomycetales	Actinomycetaceae	Schaalia	Schaalia suimastitidis
GCA_000426805.1_ASM42680v1_genomic.fna	gtdb	Bacteria	Proteobacteria	Gammaproteobacteria	Cellvibrionales	Cellvibrionaceae	Teredinibacter	Teredinibacter turnerae
GCA_000423365.1_ASM42336v1_genomic.fna	gtdb	Bacteria	Proteobacteria	Alphaproteobacteria	Rhizobiales	Hyphomicrobiaceae	Maritalea	Maritalea myrionectae
GCA_000426925.1_Acir310F_genomic.fna	gtdb	Bacteria	Cyanobacteria	NA	Nostocales	Aphanizomenonaceae	Dolichospermum	Dolichospermum circinale
GCA_000429965.1_ASM42996v1_genomic.fna	gtdb	Bacteria	Proteobacteria	Deltaproteobacteria	Desulfobacterales	Desulfobulbaceae	Desulfobulbus	Desulfobulbus mediterraneus
GCA_000480135.1_Bruc_suis_06-997-1672_V1_genomic.fna	gtdb	Bacteria	Proteobacteria	Alphaproteobacteria	Rhizobiales	Brucellaceae	Brucella	Brucella suis
GCA_000425145.1_ASM42514v1_genomic.fna	gtdb	Bacteria	Bacteroidetes	Sphingobacteriia	Sphingobacteriales	Sphingobacteriaceae	Pedobacter	Pedobacter glucosidilyticus
GCA_000430825.1_ASM43082v1_genomic.fna	gtdb	Bacteria	Bacteroidetes	Flavobacteriia	Flavobacteriales	Flavobacteriaceae	Chryseobacterium	Chryseobacterium daeguense
GCA_000450565.2_ASM45056v2_genomic.fna	gtdb	Bacteria	Firmicutes	Clostridia	Clostridiales	Peptostreptococcaceae	Clostridioides	Clostridioides difficile
GCA_000426505.1_ASM42650v1_genomic.fna	gtdb	Bacteria	Proteobacteria	Alphaproteobacteria	Rhodospirillales	Rhodospirillaceae	Nisaea	Nisaea denitrificans
GCA_000467975.1_ASM46797v1_genomic.fna	gtdb	Bacteria	Bacteroidetes	Bacteroidia	Bacteroidales	Porphyromonadaceae	Porphyromonas	Porphyromonas gingivalis
GCA_000470745.1_version_1_of_the_Halomonas_huanghegensis_genomic.fna	gtdb	Bacteria	Proteobacteria	Gammaproteobacteria	Oceanospirillales	Halomonadaceae	Halomonas	Halomonas huangheensis
GCA_000427585.1_ASM42758v1_genomic.fna	gtdb	Bacteria	Proteobacteria	Alphaproteobacteria	Rhizobiales	Rhizobiaceae	Sinorhizobium	Sinorhizobium meliloti
GCA_000443225.1_MhBrainv2_genomic.fna	gtdb	Bacteria	Proteobacteria	Gammaproteobacteria	Pasteurellales	Pasteurellaceae	Mannheimia	Mannheimia haemolytica
GCA_000426865.1_ASM42686v1_genomic.fna	gtdb	Bacteria	Proteobacteria	Deltaproteobacteria	Desulfuromonadales	Geobacteraceae	Geobacter	Geobacter bremensis
GCA_000428865.1_ASM42886v1_genomic.fna	gtdb	Bacteria	Firmicutes	Bacilli	Lactobacillales	Aerococcaceae	Eremococcus	Eremococcus coleocola
GCA_000479975.1_Bruc_meli_02-7258_V1_genomic.fna	gtdb	Bacteria	Proteobacteria	Alphaproteobacteria	Rhizobiales	Brucellaceae	Brucella	Brucella melitensis
GCA_000420765.1_ASM42076v1_genomic.fna	gtdb	Bacteria	Proteobacteria	Alphaproteobacteria	Sphingomonadales	Sphingomonadaceae	Sandarakinorhabdus	Sandarakinorhabdus limnophila
GCA_000473225.1_ASM47322v1_genomic.fna	gtdb	Bacteria	Proteobacteria	Alphaproteobacteria	Rhodobacterales	Rhodobacteraceae	Sedimentitalea	Sedimentitalea nanhaiensis
GCA_000427705.1_ASM42770v1_genomic.fna	gtdb	Bacteria	Proteobacteria	Alphaproteobacteria	Rhizobiales	Rhizobiaceae	Rhizobium	Rhizobium leguminosarum
GCA_000427195.1_ASM42719v1_genomic.fna	gtdb	Bacteria	Proteobacteria	Betaproteobacteria	Burkholderiales	Burkholderiaceae	Ralstonia	Ralstonia solanacearum
GCA_000420625.1_ASM42062v1_genomic.fna	gtdb	Bacteria	Proteobacteria	Alphaproteobacteria	Rhodospirillales	Rhodospirillaceae	Fodinicurvata	Fodinicurvata sediminis
GCA_000442985.1_AtP4V1.0_genomic.fna	gtdb	Bacteria	Proteobacteria	Alphaproteobacteria	Rhizobiales	Rhizobiaceae	Agrobacterium	Agrobacterium tumefaciens
GCA_000422285.1_ASM42228v1_genomic.fna	gtdb	Bacteria	Proteobacteria	Deltaproteobacteria	Desulfobacterales	Desulfobacteraceae	Desulfatiglans	Desulfatiglans anilini
GCA_000450405.2_ASM45040v2_genomic.fna	gtdb	Bacteria	Firmicutes	Clostridia	Clostridiales	Peptostreptococcaceae	Clostridioides	Clostridioides difficile
GCA_000420665.1_ASM42066v1_genomic.fna	gtdb	Bacteria	Proteobacteria	Alphaproteobacteria	Rhodobacterales	Hyphomonadaceae	Ponticaulis	Ponticaulis koreensis
GCA_000430545.1_ASM43054v1_genomic.fna	gtdb	Bacteria	Bacteroidetes	Flavobacteriia	Flavobacteriales	Flavobacteriaceae	Tenacibaculum	Tenacibaculum ovolyticum
GCA_000478765.1_PtemJ3_1.0_genomic.fna	gtdb	Bacteria	Proteobacteria	Gammaproteobacteria	Enterobacterales	Morganellaceae	Photorhabdus	Photorhabdus temperata
GCA_000473915.1_Prescottia_equi_Genome_sequencing_genomic.fna	gtdb	Bacteria	Actinobacteria	Actinobacteria	Corynebacteriales	Nocardiaceae	Rhodococcus	Rhodococcus hoagii
GCA_000423565.1_ASM42356v1_genomic.fna	gtdb	Bacteria	Bacteroidetes	Cytophagia	Cytophagales	Cytophagaceae	Runella	Runella zeae
GCA_000423505.1_ASM42350v1_genomic.fna	gtdb	Bacteria	Actinobacteria	Actinobacteria	Micrococcales	Microbacteriaceae	Pseudoclavibacter	Pseudoclavibacter soli
GCA_000427665.1_ASM42766v1_genomic.fna	gtdb	Bacteria	Proteobacteria	Alphaproteobacteria	Rhodospirillales	Geminicoccaceae	Geminicoccus	Geminicoccus roseus
GCA_000423805.1_ASM42380v1_genomic.fna	gtdb	Bacteria	Proteobacteria	Alphaproteobacteria	Rhodospirillales	Rhodospirillaceae	Thalassobaculum	Thalassobaculum salexigens
GCA_000472705.1_ASM47270v1_genomic.fna	gtdb	Bacteria	Proteobacteria	Alphaproteobacteria	Rhizobiales	Phyllobacteriaceae	Mesorhizobium	Mesorhizobium erdmanii
GCA_000467815.1_ASM46781v1_genomic.fna	gtdb	Bacteria	Bacteroidetes	Bacteroidia	Bacteroidales	Porphyromonadaceae	Porphyromonas	Porphyromonas gingivalis
GCA_000430645.1_ASM43064v1_genomic.fna	gtdb	Bacteria	Bacteroidetes	Flavobacteriia	Flavobacteriales	Flavobacteriaceae	Aquimarina	Aquimarina latercula
GCA_000467995.1_ASM46799v1_genomic.fna	gtdb	Bacteria	Bacteroidetes	Bacteroidia	Bacteroidales	Porphyromonadaceae	Porphyromonas	Porphyromonas gingivalis
GCA_000478845.1_FT_99A_genomic.fna	gtdb	Bacteria	Proteobacteria	Gammaproteobacteria	Thiotrichales	Francisellaceae	Francisella	Francisella tularensis
GCA_000426585.1_ASM42658v1_genomic.fna	gtdb	Bacteria	Bacteroidetes	Bacteroidia	Bacteroidales	Prevotellaceae	Prevotella	Prevotella baroniae
GCA_000429445.1_ASM42944v1_genomic.fna	gtdb	Bacteria	Bacteroidetes	Cytophagia	Cytophagales	Cyclobacteriaceae	Algoriphagus	Algoriphagus terrigena
GCA_000426225.1_ASM42622v1_genomic.fna	gtdb	Bacteria	Proteobacteria	Deltaproteobacteria	Desulfobacterales	Desulfobacteraceae	Desulforegula	Desulforegula conservatrix
GCA_000472785.1_ASM47278v1_genomic.fna	gtdb	Bacteria	Proteobacteria	Alphaproteobacteria	Rhizobiales	Phyllobacteriaceae	Mesorhizobium	Mesorhizobium loti
GCA_000420685.1_ASM42068v1_genomic.fna	gtdb	Bacteria	Actinobacteria	Actinobacteria	Corynebacteriales	Gordoniaceae	Gordonia	Gordonia hirsuta
GCA_000463315.1_B_cell_WH2_1.0_genomic.fna	gtdb	Bacteria	Bacteroidetes	Bacteroidia	Bacteroidales	Bacteroidaceae	Bacteroides	Bacteroides cellulosilyticus
GCA_000473365.1_ASM47336v1_genomic.fna	gtdb	Bacteria	Bacteroidetes	Cytophagia	Cytophagales	Hymenobacteraceae	Adhaeribacter	Adhaeribacter aquaticus
GCA_000473325.1_ASM47332v1_genomic.fna	gtdb	Bacteria	Proteobacteria	Alphaproteobacteria	Rhodobacterales	Rhodobacteraceae	Leisingera	Leisingera caerulea
GCA_000424745.1_ASM42474v1_genomic.fna	gtdb	Bacteria	Actinobacteria	Actinobacteria	Micromonosporales	Micromonosporaceae	Salinispora	Salinispora arenicola
GCA_000422805.1_ASM42280v1_genomic.fna	gtdb	Bacteria	Actinobacteria	Actinobacteria	Propionibacteriales	Nocardioidaceae	Nocardioides	Nocardioides halotolerans
GCA_000420745.1_ASM42074v1_genomic.fna	gtdb	Bacteria	Proteobacteria	Alphaproteobacteria	Rhodobacterales	Rhodobacteraceae	Pseudorhodobacter	Pseudorhodobacter ferrugineus
GCA_000464845.1_NC98_2_genomic.fna	gtdb	Bacteria	Cyanobacteria	NA	Oscillatoriales	Microcoleaceae	Planktothrix	Planktothrix prolifica
GCA_000472745.1_ASM47274v1_genomic.fna	gtdb	Bacteria	Proteobacteria	Alphaproteobacteria	Rhizobiales	Bradyrhizobiaceae	Bradyrhizobium	Bradyrhizobium japonicum
GCA_000464665.1_NC15_1_genomic.fna	gtdb	Bacteria	Cyanobacteria	NA	Oscillatoriales	Microcoleaceae	Planktothrix	Planktothrix agardhii
GCA_000474655.1_Dickeya1.0_genomic.fna	gtdb	Bacteria	Proteobacteria	Gammaproteobacteria	Enterobacterales	Pectobacteriaceae	Dickeya	Dickeya solani
GCA_000429165.1_ASM42916v1_genomic.fna	gtdb	Bacteria	Proteobacteria	Alphaproteobacteria	Rhodospirillales	Acetobacteraceae	Acetobacter	Acetobacter nitrogenifigens
GCA_000473005.1_ASM47300v1_genomic.fna	gtdb	Bacteria	Proteobacteria	Alphaproteobacteria	Rhizobiales	Bradyrhizobiaceae	Bradyrhizobium	Bradyrhizobium elkanii
GCA_000472725.1_ASM47272v1_genomic.fna	gtdb	Bacteria	Proteobacteria	Alphaproteobacteria	Rhizobiales	Bradyrhizobiaceae	Bradyrhizobium	Bradyrhizobium ottawaense
GCA_000443205.1_MhD193v2_genomic.fna	gtdb	Bacteria	Proteobacteria	Gammaproteobacteria	Pasteurellales	Pasteurellaceae	Mannheimia	Mannheimia haemolytica
GCA_000472945.1_ASM47294v1_genomic.fna	gtdb	Bacteria	Proteobacteria	Alphaproteobacteria	Rhizobiales	Bradyrhizobiaceae	Bradyrhizobium	Bradyrhizobium japonicum
GCA_000427925.1_ASM42792v1_genomic.fna	gtdb	Bacteria	Proteobacteria	Alphaproteobacteria	Rhizobiales	Rhizobiaceae	Rhizobium	Rhizobium mesoamericanum
GCA_000473085.1_ASM47308v1_genomic.fna	gtdb	Bacteria	Proteobacteria	Alphaproteobacteria	Rhizobiales	Xanthobacteraceae	Azorhizobium	Azorhizobium doebereinerae
GCA_000469645.1_ASM46964v1_genomic.fna	gtdb	Bacteria	Actinobacteria	Actinobacteria	Corynebacteriales	Nocardiaceae	Rhodococcus	Rhodococcus rhodochrous
GCA_000426365.1_ASM42636v1_genomic.fna	gtdb	Bacteria	Proteobacteria	Gammaproteobacteria	Xanthomonadales	Xanthomonadaceae	Arenimonas	Arenimonas composti
GCA_000472585.1_ASM47258v1_genomic.fna	gtdb	Bacteria	Proteobacteria	Alphaproteobacteria	Pelagibacterales	Pelagibacteraceae	Candidatus Pelagibacter	Candidatus Pelagibacter ubique
GCA_000428765.1_ASM42876v1_genomic.fna	gtdb	Bacteria	Proteobacteria	Alphaproteobacteria	Caulobacterales	Caulobacteraceae	Brevundimonas	Brevundimonas aveniformis
GCA_000423845.1_ASM42384v1_genomic.fna	gtdb	Bacteria	Thermodesulfobacteria	Thermodesulfobacteria	Thermodesulfobacteriales	Thermodesulfobacteriaceae	Thermodesulfobacterium	Thermodesulfobacterium hveragerdense
GCA_000423045.1_ASM42304v1_genomic.fna	gtdb	Bacteria	Bacteroidetes	Flavobacteriia	Flavobacteriales	Flavobacteriaceae	Gramella	Gramella portivictoriae
GCA_000443165.1_TT_genomic.fna	gtdb	Bacteria	Proteobacteria	Betaproteobacteria	Rhodocyclales	Zoogloeaceae	Thauera	Thauera terpenica
GCA_000429925.1_ASM42992v1_genomic.fna	gtdb	Bacteria	Proteobacteria	Deltaproteobacteria	Desulfobacterales	Desulfobacteraceae	Desulfatirhabdium	Desulfatirhabdium butyrativorans
GCA_000425105.1_ASM42510v1_genomic.fna	gtdb	Bacteria	Actinobacteria	Actinobacteria	Micrococcales	Microbacteriaceae	Agrococcus	Agrococcus lahaulensis
GCA_000439555.1_ASM43955v1_genomic.fna	gtdb	Bacteria	Proteobacteria	Gammaproteobacteria	Alteromonadales	Alteromonadaceae	Alteromonas	Alteromonas mediterranea
GCA_001713215.1_ASM171321v1_genomic.fna	gtdb	Bacteria	Spirochaetes	Spirochaetia	Spirochaetales	Spirochaetaceae	Treponema	Treponema pallidum
GCA_001679365.1_ASM167936v1_genomic.fna	gtdb	Bacteria	Proteobacteria	Gammaproteobacteria	Pasteurellales	Pasteurellaceae	Haemophilus	Haemophilus influenzae
GCA_001681955.1_ASM168195v1_genomic.fna	gtdb	Bacteria	Proteobacteria	Alphaproteobacteria	Rhodobacterales	Rhodobacteraceae	Epibacterium	Epibacterium mobile
GCA_001680765.1_ASM168076v1_genomic.fna	gtdb	Bacteria	Proteobacteria	Gammaproteobacteria	Pasteurellales	Pasteurellaceae	Aggregatibacter	Aggregatibacter aphrophilus
GCA_001676875.1_ASM167687v1_genomic.fna	gtdb	Bacteria	Proteobacteria	Betaproteobacteria	Neisseriales	Chromobacteriaceae	Chromobacterium	Chromobacterium subtsugae
GCA_001703535.1_ASM170353v1_genomic.fna	gtdb	Bacteria	Firmicutes	Bacilli	Bacillales	Listeriaceae	Brochothrix	Brochothrix thermosphacta
GCA_001688145.1_ASM168814v1_genomic.fna	gtdb	Bacteria	Proteobacteria	Gammaproteobacteria	Enterobacterales	Enterobacteriaceae	Shigella	Shigella sonnei
GCA_001696935.1_FTUL005-SEQ-1-ASM-1_genomic.fna	gtdb	Bacteria	Proteobacteria	Gammaproteobacteria	Thiotrichales	Francisellaceae	Francisella	Francisella tularensis
GCA_001662055.1_ASM166205v1_genomic.fna	gtdb	Bacteria	Proteobacteria	Alphaproteobacteria	Rhizobiales	Rhizobiaceae	Rhizobium	Rhizobium bangladeshense
GCA_001698225.1_ASM169822v1_genomic.fna	gtdb	Bacteria	Actinobacteria	Actinobacteria	Corynebacteriales	Gordoniaceae	Gordonia	Gordonia terrae
GCA_001670545.1_ASM167054v1_genomic.fna	gtdb	Bacteria	Proteobacteria	Gammaproteobacteria	Pasteurellales	Pasteurellaceae	Pasteurella	Pasteurella multocida
GCA_001691555.1_ASM169155v1_genomic.fna	gtdb	Bacteria	Proteobacteria	Gammaproteobacteria	Enterobacterales	Erwiniaceae	Pantoea	Pantoea eucrina
GCA_001699795.1_ASM169979v1_genomic.fna	gtdb	Bacteria	Proteobacteria	Betaproteobacteria	Burkholderiales	Burkholderiaceae	Ralstonia	Ralstonia pickettii
GCA_001679805.1_ASM167980v1_genomic.fna	gtdb	Bacteria	Firmicutes	Clostridia	Clostridiales	Clostridiaceae	Clostridium	Clostridium paraputrificum
GCA_001679235.1_ASM167923v1_genomic.fna	gtdb	Bacteria	Proteobacteria	Gammaproteobacteria	Pasteurellales	Pasteurellaceae	Haemophilus	Haemophilus influenzae
GCA_001700315.1_ASM170031v1_genomic.fna	gtdb	Bacteria	Firmicutes	Bacilli	Bacillales	Planococcaceae	Caryophanon	Caryophanon tenue
GCA_001689265.1_ASM168926v1_genomic.fna	gtdb	Bacteria	Proteobacteria	Gammaproteobacteria	Enterobacterales	Enterobacteriaceae	Shigella	Shigella sonnei
GCA_001656035.1_ASM165603v1_genomic.fna	gtdb	Bacteria	Proteobacteria	Gammaproteobacteria	Enterobacterales	Yersiniaceae	Yersinia	Yersinia entomophaga
GCA_001681525.1_ASM168152v1_genomic.fna	gtdb	Bacteria	Proteobacteria	Alphaproteobacteria	Rhodobacterales	Rhodobacteraceae	Epibacterium	Epibacterium mobile
GCA_001715655.1_ASM171565v1_genomic.fna	gtdb	Bacteria	Firmicutes	Bacilli	Bacillales	Listeriaceae	Brochothrix	Brochothrix thermosphacta
GCA_001656505.1_ASM165650v1_genomic.fna	gtdb	Bacteria	Proteobacteria	Gammaproteobacteria	Pseudomonadales	Moraxellaceae	Moraxella	Moraxella catarrhalis
GCA_001685575.1_ASM168557v1_genomic.fna	gtdb	Bacteria	Proteobacteria	Gammaproteobacteria	Legionellales	Legionellaceae	Legionella	Legionella pneumophila
GCA_001715735.1_ASM171573v1_genomic.fna	gtdb	Bacteria	Firmicutes	Bacilli	Bacillales	Listeriaceae	Brochothrix	Brochothrix thermosphacta
GCA_001660965.1_ASM166096v1_genomic.fna	gtdb	Bacteria	Actinobacteria	Actinobacteria	Propionibacteriales	Propionibacteriaceae	Cutibacterium	Cutibacterium acnes
GCA_001682035.1_ASM168203v1_genomic.fna	gtdb	Bacteria	Proteobacteria	Alphaproteobacteria	Rhodobacterales	Rhodobacteraceae	Epibacterium	Epibacterium mobile
GCA_001686935.1_ASM168693v1_genomic.fna	gtdb	Bacteria	Bacteroidetes	Flavobacteriia	Flavobacteriales	Flavobacteriaceae	Flavobacterium	Flavobacterium glycines
GCA_001649125.1_ASM164912v1_genomic.fna	gtdb	Bacteria	Proteobacteria	Gammaproteobacteria	Enterobacterales	Enterobacteriaceae	Shigella	Shigella flexneri
GCA_001688475.1_ASM168847v1_genomic.fna	gtdb	Bacteria	Proteobacteria	Gammaproteobacteria	Enterobacterales	Enterobacteriaceae	Shigella	Shigella sonnei
GCA_001654915.1_Bfe51602_DRAFTv1_genomic.fna	gtdb	Bacteria	Proteobacteria	Gammaproteobacteria	Enterobacterales	Enterobacteriaceae	Buttiauxella	Buttiauxella ferragutiae
GCA_001653675.1_ASM165367v1_genomic.fna	gtdb	Bacteria	Proteobacteria	Gammaproteobacteria	Enterobacterales	Morganellaceae	Morganella	Morganella morganii
GCA_001670525.1_ASM167052v1_genomic.fna	gtdb	Bacteria	Proteobacteria	Gammaproteobacteria	Pasteurellales	Pasteurellaceae	Pasteurella	Pasteurella multocida
GCA_001686265.1_ER_CSP_1.0_genomic.fna	gtdb	Bacteria	Proteobacteria	Alphaproteobacteria	Rickettsiales	Anaplasmataceae	Ehrlichia	Ehrlichia ruminantium
GCA_001649175.1_ASM164917v1_genomic.fna	gtdb	Bacteria	Proteobacteria	Gammaproteobacteria	Enterobacterales	Enterobacteriaceae	Shigella	Shigella flexneri
GCA_001662285.1_ASM166228v1_genomic.fna	gtdb	Bacteria	Proteobacteria	Gammaproteobacteria	Oceanospirillales	Halomonadaceae	Halomonas	Halomonas caseinilytica
GCA_001693815.1_ASM169381v1_genomic.fna	gtdb	Bacteria	Actinobacteria	Actinobacteria	Propionibacteriales	Propionibacteriaceae	Tessaracoccus	Tessaracoccus lapidicaptus
GCA_001716015.1_ASM171601v1_genomic.fna	gtdb	Bacteria	Firmicutes	Bacilli	Bacillales	Listeriaceae	Brochothrix	Brochothrix thermosphacta
GCA_001689015.1_ASM168901v1_genomic.fna	gtdb	Bacteria	Proteobacteria	Gammaproteobacteria	Enterobacterales	Enterobacteriaceae	Shigella	Shigella sonnei
GCA_001650835.1_ASM165083v1_genomic.fna	gtdb	Bacteria	Proteobacteria	Alphaproteobacteria	Rhodobacterales	Rhodobacteraceae	Sulfitobacter	Sulfitobacter pontiacus
GCA_001650195.1_ASM165019v1_genomic.fna	gtdb	Bacteria	Cyanobacteria	NA	Synechococcales	Leptolyngbyaceae	Phormidesmis	Phormidesmis priestleyi
GCA_001715645.1_ASM171564v1_genomic.fna	gtdb	Bacteria	Firmicutes	Bacilli	Bacillales	Listeriaceae	Brochothrix	Brochothrix thermosphacta
GCA_001699865.1_ASM169986v1_genomic.fna	gtdb	Bacteria	Bacteroidetes	Bacteroidia	Bacteroidales	Bacteroidaceae	Bacteroides	Bacteroides fragilis
GCA_001688075.1_ASM168807v1_genomic.fna	gtdb	Bacteria	Proteobacteria	Gammaproteobacteria	Enterobacterales	Enterobacteriaceae	Shigella	Shigella sonnei
GCA_001671475.1_ASM167147v1_genomic.fna	gtdb	Bacteria	Proteobacteria	Alphaproteobacteria	Rhizobiales	Phyllobacteriaceae	Mesorhizobium	Mesorhizobium loti
GCA_001696955.1_FTUL002-SEQ-1-ASM-1_genomic.fna	gtdb	Bacteria	Proteobacteria	Gammaproteobacteria	Thiotrichales	Francisellaceae	Francisella	Francisella tularensis
GCA_001649215.1_ASM164921v1_genomic.fna	gtdb	Bacteria	Proteobacteria	Gammaproteobacteria	Enterobacterales	Enterobacteriaceae	Shigella	Shigella flexneri
GCA_001689355.1_ASM168935v1_genomic.fna	gtdb	Bacteria	Proteobacteria	Gammaproteobacteria	Enterobacterales	Enterobacteriaceae	Shigella	Shigella sonnei
GCA_001662905.1_ASM166290v1_genomic.fna	gtdb	Bacteria	Proteobacteria	Alphaproteobacteria	Rhodospirillales	Acetobacteraceae	Acetobacter	Acetobacter pasteurianus
GCA_001679415.1_ASM167941v1_genomic.fna	gtdb	Bacteria	Proteobacteria	Gammaproteobacteria	Pasteurellales	Pasteurellaceae	Haemophilus	Haemophilus influenzae
GCA_001686925.1_ASM168692v1_genomic.fna	gtdb	Bacteria	Bacteroidetes	Flavobacteriia	Flavobacteriales	Flavobacteriaceae	Flavobacterium	Flavobacterium piscis
GCA_001679275.1_ASM167927v1_genomic.fna	gtdb	Bacteria	Proteobacteria	Gammaproteobacteria	Pseudomonadales	Moraxellaceae	Moraxella	Moraxella osloensis
GCA_001659725.1_ASM165972v1_genomic.fna	gtdb	Bacteria	Proteobacteria	Betaproteobacteria	Burkholderiales	Burkholderiaceae	Polynucleobacter	Polynucleobacter wuianus
GCA_001649265.1_ASM164926v1_genomic.fna	gtdb	Bacteria	Proteobacteria	Gammaproteobacteria	Enterobacterales	Enterobacteriaceae	Shigella	Shigella flexneri
GCA_001681715.1_ASM168171v1_genomic.fna	gtdb	Bacteria	Proteobacteria	Alphaproteobacteria	Rhodobacterales	Rhodobacteraceae	Epibacterium	Epibacterium mobile
GCA_001670875.1_RCAD0127_genomic.fna	gtdb	Bacteria	Bacteroidetes	Flavobacteriia	Flavobacteriales	Flavobacteriaceae	Riemerella	Riemerella anatipestifer
GCA_001653715.1_ASM165371v1_genomic.fna	gtdb	Bacteria	Proteobacteria	Alphaproteobacteria	Rhizobiales	Methylobacteriaceae	Methylobacterium	Methylobacterium platani
GCA_001681255.1_ASM168125v1_genomic.fna	gtdb	Bacteria	Proteobacteria	Alphaproteobacteria	Rhodobacterales	Rhodobacteraceae	Epibacterium	Epibacterium mobile
GCA_001687935.1_ASM168793v1_genomic.fna	gtdb	Bacteria	Proteobacteria	Gammaproteobacteria	Enterobacterales	Enterobacteriaceae	Shigella	Shigella sonnei
GCA_001684415.1_ASM168441v1_genomic.fna	gtdb	Bacteria	Proteobacteria	Gammaproteobacteria	Xanthomonadales	Xanthomonadaceae	Xylella	Xylella fastidiosa
GCA_001660955.1_ASM166095v1_genomic.fna	gtdb	Bacteria	Actinobacteria	Actinobacteria	Propionibacteriales	Propionibacteriaceae	Cutibacterium	Cutibacterium acnes
GCA_001655315.1_ASM165531v1_genomic.fna	gtdb	Bacteria	Spirochaetes	Spirochaetia	Spirochaetales	Spirochaetaceae	Treponema	Treponema pallidum
GCA_001678995.1_ASM167899v1_genomic.fna	gtdb	Bacteria	Proteobacteria	Gammaproteobacteria	Pseudomonadales	Moraxellaceae	Moraxella	Moraxella atlantae
GCA_001688755.1_ASM168875v1_genomic.fna	gtdb	Bacteria	Proteobacteria	Gammaproteobacteria	Enterobacterales	Enterobacteriaceae	Shigella	Shigella sonnei
GCA_001712955.1_ASM171295v1_genomic.fna	gtdb	Bacteria	Spirochaetes	Spirochaetia	Spirochaetales	Spirochaetaceae	Treponema	Treponema pallidum
GCA_001713335.1_ASM171333v1_genomic.fna	gtdb	Bacteria	Spirochaetes	Spirochaetia	Spirochaetales	Spirochaetaceae	Treponema	Treponema pallidum
GCA_001688605.1_ASM168860v1_genomic.fna	gtdb	Bacteria	Proteobacteria	Gammaproteobacteria	Enterobacterales	Enterobacteriaceae	Shigella	Shigella sonnei
GCA_001656475.1_ASM165647v1_genomic.fna	gtdb	Bacteria	Proteobacteria	Gammaproteobacteria	Pseudomonadales	Moraxellaceae	Moraxella	Moraxella catarrhalis
GCA_001712915.1_ASM171291v1_genomic.fna	gtdb	Bacteria	Spirochaetes	Spirochaetia	Spirochaetales	Spirochaetaceae	Treponema	Treponema pallidum
GCA_001688115.1_ASM168811v1_genomic.fna	gtdb	Bacteria	Proteobacteria	Gammaproteobacteria	Enterobacterales	Enterobacteriaceae	Shigella	Shigella sonnei
GCA_001680805.1_ASM168080v1_genomic.fna	gtdb	Bacteria	Proteobacteria	Gammaproteobacteria	Pasteurellales	Pasteurellaceae	Aggregatibacter	Aggregatibacter aphrophilus
GCA_001730205.1_ASM173020v1_genomic.fna	gtdb	Bacteria	Proteobacteria	Gammaproteobacteria	Aeromonadales	Aeromonadaceae	Aeromonas	Aeromonas caviae
GCA_001681675.1_ASM168167v1_genomic.fna	gtdb	Bacteria	Proteobacteria	Alphaproteobacteria	Rhodobacterales	Rhodobacteraceae	Epibacterium	Epibacterium mobile
GCA_001688045.1_ASM168804v1_genomic.fna	gtdb	Bacteria	Proteobacteria	Gammaproteobacteria	Enterobacterales	Enterobacteriaceae	Shigella	Shigella sonnei
GCA_001670435.1_ASM167043v1_genomic.fna	gtdb	Bacteria	Proteobacteria	Gammaproteobacteria	Pasteurellales	Pasteurellaceae	Pasteurella	Pasteurella multocida
GCA_001672355.1_NZP2042_genomic.fna	gtdb	Bacteria	Proteobacteria	Alphaproteobacteria	Rhizobiales	Phyllobacteriaceae	Mesorhizobium	Mesorhizobium loti
GCA_001679065.1_ASM167906v1_genomic.fna	gtdb	Bacteria	Proteobacteria	Gammaproteobacteria	Pseudomonadales	Moraxellaceae	Moraxella	Moraxella atlantae
GCA_001656115.1_ASM165611v1_genomic.fna	gtdb	Bacteria	Proteobacteria	Gammaproteobacteria	Pseudomonadales	Moraxellaceae	Moraxella	Moraxella catarrhalis
GCA_001682055.1_ASM168205v1_genomic.fna	gtdb	Bacteria	Proteobacteria	Alphaproteobacteria	Rhodobacterales	Rhodobacteraceae	Epibacterium	Epibacterium mobile
GCA_001692245.1_ASM169224v1_genomic.fna	gtdb	Bacteria	Proteobacteria	Alphaproteobacteria	Rhizobiales	Rhizobiaceae	Agrobacterium	Agrobacterium tumefaciens
GCA_001703555.1_ASM170355v1_genomic.fna	gtdb	Bacteria	Firmicutes	Bacilli	Lactobacillales	Carnobacteriaceae	Carnobacterium	Carnobacterium divergens
GCA_001660865.1_ASM166086v1_genomic.fna	gtdb	Bacteria	Actinobacteria	Actinobacteria	Propionibacteriales	Propionibacteriaceae	Cutibacterium	Cutibacterium acnes
GCA_001656195.1_ASM165619v1_genomic.fna	gtdb	Bacteria	Proteobacteria	Gammaproteobacteria	Pseudomonadales	Moraxellaceae	Moraxella	Moraxella catarrhalis
GCA_001662875.1_ASM166287v1_genomic.fna	gtdb	Bacteria	Proteobacteria	Alphaproteobacteria	Rhodospirillales	Rhodospirillaceae	Thalassospira	Thalassospira tepidiphila
GCA_001670785.1_RCAD0183_genomic.fna	gtdb	Bacteria	Bacteroidetes	Flavobacteriia	Flavobacteriales	Flavobacteriaceae	Riemerella	Riemerella anatipestifer
GCA_001676315.1_ASM167631v1_genomic.fna	gtdb	Bacteria	Proteobacteria	Gammaproteobacteria	Xanthomonadales	Xanthomonadaceae	Stenotrophomonas	Stenotrophomonas maltophilia
GCA_001692265.1_ASM169226v1_genomic.fna	gtdb	Bacteria	Proteobacteria	Alphaproteobacteria	Rhizobiales	Rhizobiaceae	Agrobacterium	Agrobacterium tumefaciens
GCA_001679445.1_ASM167944v1_genomic.fna	gtdb	Bacteria	Proteobacteria	Gammaproteobacteria	Pasteurellales	Pasteurellaceae	Haemophilus	Haemophilus haemolyticus
GCA_001656425.1_ASM165642v1_genomic.fna	gtdb	Bacteria	Proteobacteria	Gammaproteobacteria	Pseudomonadales	Moraxellaceae	Moraxella	Moraxella catarrhalis
GCA_001670775.1_ASM167077v1_genomic.fna	gtdb	Bacteria	Proteobacteria	Gammaproteobacteria	Pasteurellales	Pasteurellaceae	Pasteurella	Pasteurella multocida
GCA_001671465.1_ASM167146v1_genomic.fna	gtdb	Bacteria	Proteobacteria	Alphaproteobacteria	Rhizobiales	Phyllobacteriaceae	Mesorhizobium	Mesorhizobium loti
GCA_001688135.1_ASM168813v1_genomic.fna	gtdb	Bacteria	Proteobacteria	Gammaproteobacteria	Enterobacterales	Enterobacteriaceae	Shigella	Shigella sonnei
GCA_001713135.1_ASM171313v1_genomic.fna	gtdb	Bacteria	Spirochaetes	Spirochaetia	Spirochaetales	Spirochaetaceae	Treponema	Treponema pallidum
GCA_001689085.1_ASM168908v1_genomic.fna	gtdb	Bacteria	Proteobacteria	Gammaproteobacteria	Enterobacterales	Enterobacteriaceae	Shigella	Shigella sonnei
GCA_001712975.1_ASM171297v1_genomic.fna	gtdb	Bacteria	Spirochaetes	Spirochaetia	Spirochaetales	Spirochaetaceae	Treponema	Treponema pallidum
GCA_001654865.1_Bno51607_DRAFTv1_genomic.fna	gtdb	Bacteria	Proteobacteria	Gammaproteobacteria	Enterobacterales	Enterobacteriaceae	Buttiauxella	Buttiauxella noackiae
GCA_001671485.1_ASM167148v1_genomic.fna	gtdb	Bacteria	Proteobacteria	Alphaproteobacteria	Rhizobiales	Phyllobacteriaceae	Mesorhizobium	Mesorhizobium loti
GCA_001681815.1_ASM168181v1_genomic.fna	gtdb	Bacteria	Proteobacteria	Alphaproteobacteria	Rhodobacterales	Rhodobacteraceae	Epibacterium	Epibacterium mobile
GCA_001679335.1_ASM167933v1_genomic.fna	gtdb	Bacteria	Proteobacteria	Gammaproteobacteria	Pasteurellales	Pasteurellaceae	Haemophilus	Haemophilus aegyptius
GCA_001671145.1_RCAD0121_genomic.fna	gtdb	Bacteria	Bacteroidetes	Flavobacteriia	Flavobacteriales	Flavobacteriaceae	Riemerella	Riemerella anatipestifer
GCA_001689225.1_ASM168922v1_genomic.fna	gtdb	Bacteria	Proteobacteria	Gammaproteobacteria	Enterobacterales	Enterobacteriaceae	Shigella	Shigella sonnei
GCA_001707485.1_ASM170748v1_genomic.fna	gtdb	Bacteria	Proteobacteria	Betaproteobacteria	Burkholderiales	Alcaligenaceae	Achromobacter	Achromobacter xylosoxidans
GCA_001663495.1_ASM166349v1_genomic.fna	gtdb	Bacteria	Actinobacteria	Actinobacteria	Corynebacteriales	Corynebacteriaceae	Corynebacterium	Corynebacterium pseudotuberculosis
GCA_001688105.1_ASM168810v1_genomic.fna	gtdb	Bacteria	Proteobacteria	Gammaproteobacteria	Enterobacterales	Enterobacteriaceae	Shigella	Shigella sonnei
GCA_001676385.1_ASM167638v1_genomic.fna	gtdb	Bacteria	Proteobacteria	Gammaproteobacteria	Xanthomonadales	Xanthomonadaceae	Stenotrophomonas	Stenotrophomonas maltophilia
GCA_001691475.1_ASM169147v1_genomic.fna	gtdb	Bacteria	Proteobacteria	Gammaproteobacteria	Legionellales	Legionellaceae	Legionella	Legionella jamestowniensis
GCA_001713315.1_ASM171331v1_genomic.fna	gtdb	Bacteria	Spirochaetes	Spirochaetia	Spirochaetales	Spirochaetaceae	Treponema	Treponema pallidum
GCA_001718205.1_ASM171820v1_genomic.fna	gtdb	Bacteria	Proteobacteria	Alphaproteobacteria	Rhizobiales	Bradyrhizobiaceae	Bradyrhizobium	Bradyrhizobium elkanii
GCA_001696805.1_ASM169680v1_genomic.fna	gtdb	Bacteria	Proteobacteria	Gammaproteobacteria	Enterobacterales	Morganellaceae	Photorhabdus	Photorhabdus australis
GCA_001685985.1_ASM168598v1_genomic.fna	gtdb	Bacteria	Actinobacteria	Actinobacteria	Bifidobacteriales	Bifidobacteriaceae	Bifidobacterium	Bifidobacterium pseudocatenulatum
GCA_001682005.1_ASM168200v1_genomic.fna	gtdb	Bacteria	Proteobacteria	Alphaproteobacteria	Rhodobacterales	Rhodobacteraceae	Epibacterium	Epibacterium mobile
GCA_001653095.1_ASM165309v1_genomic.fna	gtdb	Bacteria	Actinobacteria	Actinobacteria	Corynebacteriales	Mycobacteriaceae	Hoyosella	Hoyosella altamirensis
GCA_001689005.1_ASM168900v1_genomic.fna	gtdb	Bacteria	Proteobacteria	Gammaproteobacteria	Enterobacterales	Enterobacteriaceae	Shigella	Shigella sonnei
GCA_001687645.1_ASM168764v1_genomic.fna	gtdb	Bacteria	Actinobacteria	Actinobacteria	Corynebacteriales	Corynebacteriaceae	Corynebacterium	Corynebacterium glutamicum
[truncated: 29,990 more rows]
